# Supplementary material for: A general protocol for stereoselective construction of enaminyl sulfonyl fluorides
Source: Royal Society of Chemistry journal article supplement (doi:10.1039/d2qo01810a), 2023-01-01

## Supporting Information

### **A general protocol for stereoselective construction of enaminyll sulfonyl fluorides**

Liu-Yang Chen<sup>a</sup>, K. P. Rakesh<sup>b</sup> and Hua-Li Qin<sup>\*a</sup>

<sup>a</sup> School of Chemistry, Chemical Engineering and Life Sciences; and State Key Laboratory of Advanced Technology for Materials Synthesis and Processing, Wuhan University of Technology, 205 Luoshi Road, Wuhan, 430070, P. R. China.

<sup>b</sup> Department of Radiology, Biomedical Research Imaging Center, University of North Carolina at Chapel Hill, Chapel Hill, NC 27599, USA.

\*Corresponding author: Hua-Li Qin;

*E-mail:* qinhuali@whut.edu.cn

## Table of Contents

|                                                                                                  |     |
|--------------------------------------------------------------------------------------------------|-----|
| 1. General Information.....                                                                      | S1  |
| 2. Optimization of the Reaction Conditions.....                                                  | S2  |
| 3. Experimental Procedures.....                                                                  | S7  |
| 3.1 Preparation of 2-chloroprop-2-ene-1-sulfonyl fluoride (CESF, <b>2</b> ).....                 | S7  |
| 3.2 Preparation of amine substrates ( <b>1</b> ).....                                            | S8  |
| 3.3 General procedure for preparation of <i>N</i> -ESF ( <b>3</b> ).....                         | S8  |
| 4. Characterization.....                                                                         | S9  |
| 5. Procedure for Scale-up Reaction of <i>N</i> -ESF ( <b>3</b> ).....                            | S27 |
| 6. NOESY of ( <i>E</i> )-2-(methyl(phenyl)amino)prop-1-ene-1-sulfonyl fluoride ( <b>3a</b> ).... | S28 |
| 7. References.....                                                                               | S29 |
| 8. NMR Spectra.....                                                                              | S30 |

## 1. General Information

All reactions were carried out under an air atmosphere unless otherwise specified. Reagents used in the reactions were all purchased from commercial sources and used without further purification. Unless otherwise specified, NMR spectra were recorded in CDCl<sub>3</sub> or DMSO-*d*<sub>6</sub> on a 500 MHz (for <sup>1</sup>H), 471 MHz (for <sup>19</sup>F), and 126 MHz (for <sup>13</sup>C) Bruker Avance spectrometer, and were internally referenced to solvent residual signals (note: CDCl<sub>3</sub>:  $\delta$  H = 7.264 ppm,  $\delta$  C = 77.16 ppm; DMSO-*d*<sub>6</sub>:  $\delta$  H = 2.500 ppm,  $\delta$  C = 39.52 ppm). The following abbreviations were used to explain the multiplicities: s = singlet, d = doublet, t = triplet, q = quartet, m = multiplet. All chemical shifts were reported in ppm relative to TMS (0 ppm) as internal standards. The HPLC experiments were carried out on a Waters e2695 instrument (column: J&K, RP-C18, 5  $\mu$ m, 4.6  $\times$  150 mm), and the yields of the products were determined by using the corresponding pure compounds as the external standards. Melting points of the products were measured on a micro melting point apparatus (SGW X-4) and uncorrected. HRMS experiments were performed on a TOF-Q ESI or CI/EI instrument. The coupling constants were reported in Hertz (Hz). The product spots on the thin layer chromatography (TLC) were visualized under ultraviolet light (254 nm or 365 nm) followed by staining with potassium permanganate or phosphomolybdic acid.

## 2. Optimization of the Reaction Conditions

Table S1 Screening the Solvent<sup>a</sup>

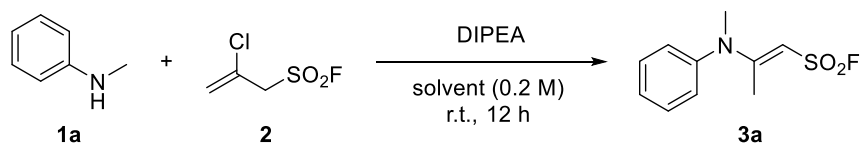

| Entry    | Solvent            | Yield ( <b>3a</b> , %) <sup>b</sup> |
|----------|--------------------|-------------------------------------|
| 1        | CH <sub>3</sub> CN | 62                                  |
| 2        | EtOH               | 35                                  |
| 3        | DMSO               | 71                                  |
| 4        | DMF                | 72                                  |
| 5        | Acetone            | 67                                  |
| 6        | 1,4-Dioxane        | 63                                  |
| <b>7</b> | <b>THF</b>         | <b>79</b>                           |
| 8        | DCM                | 53                                  |
| 9        | Toluene            | 45                                  |
| 10       | H <sub>2</sub> O   | N.D.                                |

<sup>a</sup>Reaction conditions: a mixture of *N*-Methylaniline (**1a**, 21 mg, 0.2 mmol, 1.0 equiv.), CESF (**2**, 32 mg, 0.2 mmol, 1.0 equiv.) and DIPEA (26 mg, 0.2 mmol, 1.0 equiv.) in solvent (1.0 mL) was stirred at r.t. for 12 h under air. <sup>b</sup>The yield was determined by HPLC using pure **3a** as the external standard ( $t_R = 3.981$  min,  $\lambda_{max} = 264.2$  nm, water/methanol =30:70 (v/v)). N.D. = Not detectable.



**Table S2** Screening the base<sup>a</sup>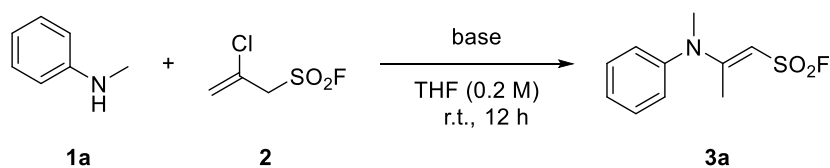

| Entry    | Base                            | Yield ( <b>3a</b> , %) <sup>b</sup> |
|----------|---------------------------------|-------------------------------------|
| 1        | DIPEA                           | 79                                  |
| 2        | DABCO                           | 52                                  |
| 3        | DBU                             | 34                                  |
| 4        | TMEDA                           | 87                                  |
| <b>5</b> | <b>Et<sub>3</sub>N</b>          | <b>93</b>                           |
| 6        | Tripropylamine                  | 47                                  |
| 7        | NaHCO <sub>3</sub>              | 11                                  |
| 8        | K <sub>2</sub> CO <sub>3</sub>  | 64                                  |
| 9        | Cs <sub>2</sub> CO <sub>3</sub> | 76                                  |

<sup>a</sup>Reaction conditions: a mixture of *N*-Methylaniline (**1a**, 21 mg, 0.2 mmol, 1.0 equiv.), CESF (**2**, 32 mg, 0.2 mmol, 1.0 equiv.) and base (0.2 mmol, 1.0 equiv.) in THF (1.0 mL) was stirred at r.t. for 12 h under air. <sup>b</sup>The yield was determined by HPLC using pure **3a** as the external standard ( $t_R = 3.981$  min,  $\lambda_{max} = 264.2$  nm, water/methanol = 30: 70 (v/v)). N.D. = Not detectable.

**Table S3** Screening the loading of CESF (**2**)<sup>a</sup>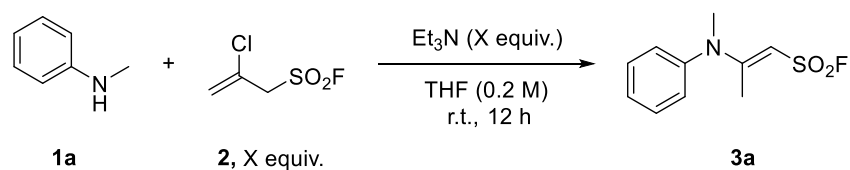

| Entry | X equiv.   | Yield ( <b>3a</b> , %) <sup>b</sup> |
|-------|------------|-------------------------------------|
| 1     | 1.0        | 93                                  |
| 2     | <b>1.2</b> | <b>97</b>                           |
| 3     | 1.5        | 95                                  |
| 4     | 2.0        | 97                                  |

<sup>a</sup>Reaction conditions: a mixture of *N*-Methylaniline (**1a**, 21 mg, 0.2 mmol, 1.0 equiv.), CESF (**2**, X equiv.) and  $\text{Et}_3\text{N}$  (X equiv.) in THF (1.0 mL) was stirred at r.t. for 12 h under air. <sup>b</sup>The yield was determined by HPLC using pure **3a** as the external standard ( $t_{\text{R}} = 3.981$  min,  $\lambda_{\text{max}} = 264.2$  nm, water/methanol = 30:70 (v/v)). N.D. = Not detectable.

**Table S4** Screening the loading of base<sup>a</sup>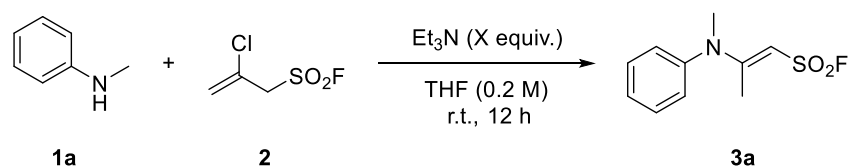

| Entry    | Et <sub>3</sub> N (X equiv.) | Yield ( <b>3a</b> , %) <sup>b</sup> |
|----------|------------------------------|-------------------------------------|
| <b>1</b> | <b>1.2</b>                   | <b>97</b>                           |
| 2        | 1.4                          | 96                                  |
| 3        | 1.6                          | 94                                  |

<sup>a</sup>Reaction conditions: a mixture of *N*-Methylaniline (**1a**, 21 mg, 0.2 mmol, 1.0 equiv.), CESF (**2**, 38 mg, 0.24 mmol, 1.2 equiv.) and Et<sub>3</sub>N (X equiv.) in THF (1.0 mL) was stirred at r.t. for 12 h under air. <sup>b</sup>The yield was determined by HPLC using pure **3a** as the external standard (*t*<sub>R</sub> = 3.981 min, λ<sub>max</sub> = 264.2 nm, water/methanol = 30:70 (v/v)). N.D. = Not detectable.

**Table S5** Screening the time of reaction<sup>a</sup>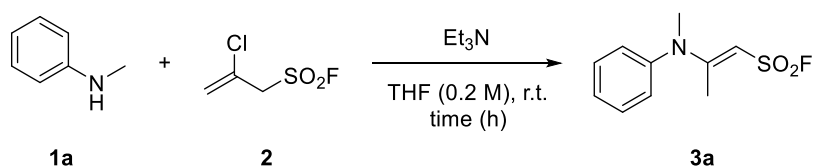

| Entry    | Time (h)   | Yield ( <b>3a</b> , %) <sup>b</sup> |
|----------|------------|-------------------------------------|
| 1        | 0.5        | 81                                  |
| 2        | 1.0        | 89                                  |
| 3        | 2.0        | 94                                  |
| <b>4</b> | <b>3.0</b> | <b>96</b>                           |
| 5        | 6.0        | 96                                  |

<sup>a</sup>Reaction conditions: a mixture of *N*-Methylaniline (**1a**, 21 mg, 0.2 mmol, 1.0 equiv.), CESF (**2**, 38 mg, 0.24 mmol, 1.2 equiv.) and  $\text{Et}_3\text{N}$  (25 mg, 0.24 mmol, 1.2 equiv.) in THF (1.0 mL) was stirred at r.t. for the corresponding time under air. <sup>b</sup>The yield was determined by HPLC using pure **3a** as the external standard ( $t_{\text{R}} = 3.981$  min,  $\lambda_{\text{max}} = 264.2$  nm, water/methanol =30:70 (v/v)). N.D. = Not detectable.

### 3. Experimental Procedures

#### 3.1 Preparation of 2-chloroprop-2-ene-1-sulfonyl fluoride (CESF)<sup>[1][2]</sup>

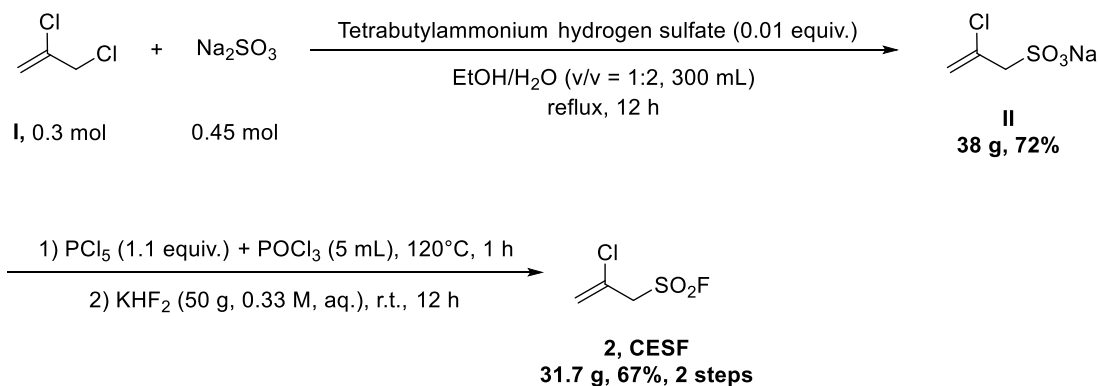

**Step 1:** 1,2-Dichloro-2-propene (33 g, 0.3 mol), Na<sub>2</sub>SO<sub>3</sub> (56 g, 0.45 mol, 1.5 equiv.) and tetrabutylammonium hydrogen sulfate (1.0 g, 0.003 mol, 0.01 equiv.) were added to a solution of EtOH and H<sub>2</sub>O (v/v = 1:2, 300 mL) with stirring and heating. The mixture was then refluxed for 12 h and the solvent evaporated in vacuo. To the residue was added EtOH (250 mL), and the mixture was refluxed with stirring for 1 h. After removing some insoluble material by filtration of the hot mixture, the filtrate was cooled. The crystalline sodium 2-chloro-2-propene-1-sulfonate was collected by filtration: 38.0 g (0.216 mol, 72%).

**Step 2:** A mixture of this sodium salt (38.0 g, 0.216 mol) and PCl<sub>5</sub> (49.5 g, 0.238 mol, 1.1 equiv.) was stirred vigorously until the mixture liquified. The solids remaining on the walls of the bottle were rinsed with phosphorus oxychloride (5 mL), then the mixture was rapidly heated to 120 °C for 1 hour, cooled, and poured onto ice with vigorous stirring. Kept the reaction mixture stirring at low temperature and extracted with CH<sub>2</sub>Cl<sub>2</sub> (50 mL). The organic phase was washed with ice water, 5% NaHCO<sub>3</sub> solution (2×100 mL), then dried, and evaporated in vacuo. The evaporated 2-chloro-2-propene sulfonyl chloride was added dropwise to the solution of KHF<sub>2</sub> (50 g, 0.33 M) with stirring for 12 hours. The reaction mixture was further extracted with CH<sub>2</sub>Cl<sub>2</sub> (2×25 mL), then dried, and evaporated in vacuo. 2-Chloroprop-2-ene-1-sulfonyl fluoride (CESF) was distilled under reduced pressure to give colorless oil 31.7 g (**2**, 67%, 2 steps). <sup>1</sup>H NMR (500 MHz, CDCl<sub>3</sub>) δ 5.75 (dd,

$J_1 = 2.4$  Hz,  $J_2 = 1.0$  Hz, 1H), 5.72 (d,  $J = 2.5$  Hz, 1H), 4.33 (dd,  $J_1 = 3.8$  Hz,  $J_2 = 0.8$  Hz, 2H).  $^{19}\text{F}$  NMR (471 MHz,  $\text{CDCl}_3$ )  $\delta$  56.4 (s, 1F).  $^{13}\text{C}$  NMR (126 MHz,  $\text{CDCl}_3$ )  $\delta$  126.6, 123.6 (d,  $J = 1.5$  Hz), 59.3 (d,  $J = 19.4$  Hz). HRMS-ESI (m/z) calcd. for  $[\text{C}_3\text{H}_5\text{ClFO}_2\text{S}]^+$  ( $[\text{M}+\text{H}]^+$ ): 158.9677, found: 158.9674.

### 3.2 Preparation of amine substrates (**1**)<sup>[3]</sup>

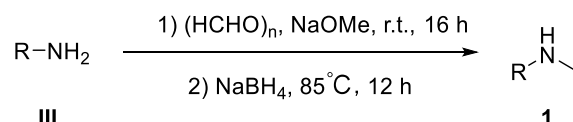

Compound **1b** was taken as an example to illustrate the preparation process of the substrate: p-methylaniline (0.53 g, 5 mmol) was added to the methanol solution (10 ml) containing sodium methanol (1.71 g, 30 mmol) in drops, and the mixed solution was continuously stirred for 0.5 h. The methanol solution (5 mL) of paraformaldehyde (0.32 g, 10 mmol) was added to the above mixture by drop and stirred for 16 h at room temperature. Sodium borocyanide (0.2 g, 5 mmol) was added to the mixture in proportion, and the reaction was heated and kept reflux for 6 h. The reaction was detected by TLC. After the reaction, the solution was concentrated under vacuum to remove the solvent. Water (50 mL) was added to the residue and the reaction mixture was extracted with ethyl acetate (3×20 mL). The extracts were dried over anhydrous  $\text{Na}_2\text{SO}_4$ , and concentrated under reduced pressure. The residue was purified by column chromatography on silica gel using a mixture of petroleum ether and ethyl acetate (10:1) as eluents to give the desired product **1b** as a white solid, 526 mg, 87% yield. The synthesis of amine substrates (**1c-1u**) can be referred to the above process.<sup>[4][5]</sup> Amine substrates (**1a**, **1v**, **1w**, **1aa-1ad**) were all purchased from commercial sources and used without further purification.

### 3.3 General procedure for preparation of N-ESF (**3**)

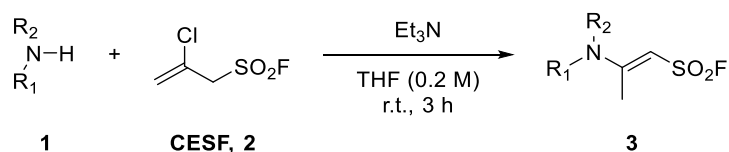

An oven-dried reaction tube (20 mL) equipped with a magnetic stirring bar was charged with amines (**1**, 1.0 mmol, 1.0 equiv.), CESF (**2**, 189 mg, 1.2 mmol, 1.2

equiv.) and 4.0 mL THF. Then, trimethylamine (122 mg, 1.2 mmol, 1.2 equiv.) dissolved in THF (1.0 mL) was added dropwise to the above solution and the solution slowly became turbid. The mixture was stirred at room temperature for 3 h under an air atmosphere monitored by TLC. After the reaction was completed, water (20 mL) was added to the mixture and the reaction mixture was extracted with ethyl acetate (3×10 mL). The extracts were dried over anhydrous Na<sub>2</sub>SO<sub>4</sub>, and concentrated under reduced pressure. The residue was purified by column chromatography on silica gel using a mixture of petroleum ether and ethyl acetate as eluents to give the desired product **3**.

#### 4. Characterization

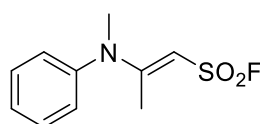

**3a**

*(E)*-2-(methyl(phenyl)amino)prop-1-ene-1-sulfonyl fluoride (**3a**). White solid, 219 mg, 96% yield. M.p. 74–76 °C. Purification by column chromatography on silica gel using petroleum ether / ethyl acetate = 10:1 (v/v) as eluent. <sup>1</sup>H NMR (500 MHz, CDCl<sub>3</sub>) δ 7.45 (t, *J* = 7.6 Hz, 2H), 7.38 (t, *J* = 7.0 Hz, 1H), 7.14 (d, *J* = 8.5 Hz, 2H), 5.06 (s, 1H), 3.26 (s, 3H), 2.19 (s, 3H). <sup>19</sup>F NMR (471 MHz, CDCl<sub>3</sub>) δ 72.3 (s, 1F). <sup>13</sup>C NMR (126 MHz, CDCl<sub>3</sub>) δ 162.6, 144.6, 130.3, 128.5, 127.0, 85.7 (d, *J* = 24.3 Hz), 41.6, 17.8. HRMS-ESI (m/z) calcd. for [C<sub>10</sub>H<sub>13</sub>FNO<sub>2</sub>S]<sup>+</sup> ([M+H]<sup>+</sup>): 230.0646, found: 230.0645.

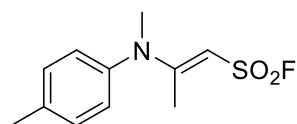

**3b**

*(E)*-2-(methyl(*p*-tolyl)amino)prop-1-ene-1-sulfonyl fluoride (**3b**). White solid, 228 mg, 94% yield. M.p. 81–83 °C. Purification by column chromatography on silica gel using petroleum ether / ethyl acetate = 10:1 (v/v) as eluent. <sup>1</sup>H NMR (500 MHz, CDCl<sub>3</sub>) δ

7.24 (d,  $J = 8.0$  Hz, 2H), 7.01 (d,  $J = 8.0$  Hz, 2H), 5.03 (s, 1H), 3.24 (s, 3H), 2.39 (s, 3H), 2.18 (s, 3H).  $^{19}\text{F}$  NMR (471 MHz,  $\text{CDCl}_3$ )  $\delta$  72.3 (s, 1F).  $^{13}\text{C}$  NMR (126 MHz,  $\text{CDCl}_3$ )  $\delta$  162.8, 142.0, 138.6, 130.8, 126.7, 85.3 (d,  $J = 24.1$  Hz), 41.7, 21.2, 17.8. **HRMS-ESI** (m/z) calcd. for  $[\text{C}_{11}\text{H}_{15}\text{FNO}_2\text{S}]^+$  ( $[\text{M}+\text{H}]^+$ ): 244.0802, found: 244.0795.

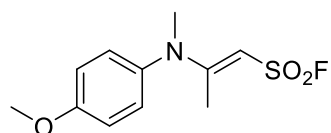

**3c**

*(E)*-2-((4-methoxyphenyl)(methyl)amino)prop-1-ene-1-sulfonyl fluoride (**3c**). White solid, 241 mg, 93% yield. M.p. 69–71 °C. Purification by column chromatography on silica gel using petroleum ether / ethyl acetate = 10:1 (v/v) as eluent.  $^1\text{H}$  NMR (500 MHz,  $\text{CDCl}_3$ )  $\delta$  7.04 (d,  $J = 9.0$  Hz, 2H), 6.93 (d,  $J = 9.0$  Hz, 2H), 5.02 (s, 1H), 3.83 (s, 3H), 3.23 (s, 3H), 2.18 (s, 3H).  $^{19}\text{F}$  NMR (471 MHz,  $\text{CDCl}_3$ )  $\delta$  72.3 (s, 1F).  $^{13}\text{C}$  NMR (126 MHz,  $\text{CDCl}_3$ )  $\delta$  162.9, 159.2, 137.2, 127.9, 115.2, 85.1 (d,  $J = 24.2$  Hz), 55.6, 41.7, 17.7. **HRMS-ESI** (m/z) calcd. for  $[\text{C}_{11}\text{H}_{15}\text{FNO}_3\text{S}]^+$  ( $[\text{M}+\text{H}]^+$ ): 260.0751, found: 260.0752.

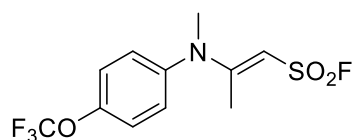

**3d**

*(E)*-2-(methyl(4-(trifluoromethoxy)phenyl)amino)prop-1-ene-1-sulfonyl fluoride (**3d**). White solid, 278 mg, 89% yield. M.p. 51–53 °C. Purification by column chromatography on silica gel using petroleum ether / ethyl acetate = 10:1 (v/v) as eluent.  $^1\text{H}$  NMR (500 MHz,  $\text{CDCl}_3$ )  $\delta$  7.31 (d,  $J = 8.5$  Hz, 2H), 7.20 (d,  $J = 8.5$  Hz, 2H), 5.09 (s, 1H), 3.26 (s, 3H), 2.20 (s, 3H).  $^{19}\text{F}$  NMR (471 MHz,  $\text{CDCl}_3$ )  $\delta$  72.1 (s, 1F), -58.0 (s, 3F).  $^{13}\text{C}$  NMR (126 MHz,  $\text{CDCl}_3$ )  $\delta$  162.3, 148.7 (d,  $J = 2.0$  Hz), 142.9, 128.8, 122.7, 120.5 (q,  $J = 258.8$  Hz), 87.1 (d,  $J = 24.7$  Hz), 41.7, 17.9. **HRMS-ESI** (m/z) calcd. for  $[\text{C}_{11}\text{H}_{12}\text{F}_4\text{NO}_3\text{S}]^+$  ( $[\text{M}+\text{H}]^+$ ): 314.0469, found: 314.0476.



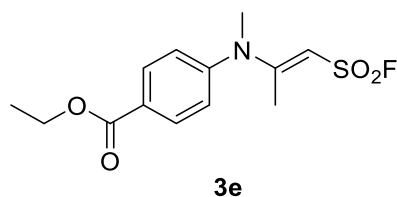

*methyl (E)-4-((1-(fluorosulfonyl)prop-1-en-2-yl)(methyl)amino)benzoate (3e)*. White solid, 243 mg, 85% yield. M.p. 84–86 °C. Purification by column chromatography on silica gel using petroleum ether / ethyl acetate = 10:1 (v/v) as eluent. <sup>1</sup>H NMR (500 MHz, CDCl<sub>3</sub>) δ 8.13 (d, *J* = 8.5 Hz, 2H), 7.22 (d, *J* = 8.5 Hz, 2H), 5.13 (s, 1H), 4.41 (q, *J* = 7.0 Hz, 2H), 3.28 (s, 3H), 2.20 (s, 3H), 1.41 (t, *J* = 7.1 Hz, 3H). <sup>19</sup>F NMR (471 MHz, CDCl<sub>3</sub>) δ 72.0 (s, 1F). <sup>13</sup>C NMR (126 MHz, CDCl<sub>3</sub>) δ 165.5, 161.9, 148.3, 131.6, 130.5, 127.1, 87.6 (d, *J* = 24.8 Hz), 61.6, 41.5, 18.0, 14.4. HRMS-ESI (m/z) calcd. for [C<sub>13</sub>H<sub>17</sub>FNO<sub>4</sub>S]<sup>+</sup> ([M+H]<sup>+</sup>): 302.0857, found: 302.0858.

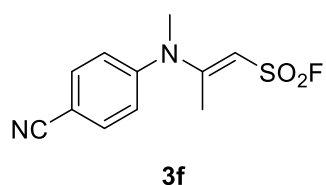

*(E)-2-((4-cyanophenyl)(methyl)amino)prop-1-ene-1-sulfonyl fluoride (3f)*. Light yellow solid, 175 mg, 69% yield. M.p. 119–121 °C. Purification by column chromatography on silica gel using petroleum ether / ethyl acetate = 5:1 (v/v) as eluent. <sup>1</sup>H NMR (500 MHz, CDCl<sub>3</sub>) δ 7.78 (d, *J* = 8.5 Hz, 2H), 7.30 (d, *J* = 8.5 Hz, 2H), 5.18 (s, 1H), 3.29 (s, 3H), 2.22 (s, 3H). <sup>19</sup>F NMR (471 MHz, CDCl<sub>3</sub>) δ 71.9 (s, 1F). <sup>13</sup>C NMR (126 MHz, CDCl<sub>3</sub>) δ 161.5, 148.3, 134.2, 128.2, 117.7, 112.3, 88.9 (d, *J* = 25.2 Hz), 41.5, 17.9. HRMS-ESI (m/z) calcd. for [C<sub>11</sub>H<sub>12</sub>FN<sub>2</sub>O<sub>2</sub>S]<sup>+</sup> ([M+H]<sup>+</sup>): 255.0598, found: 255.0605.

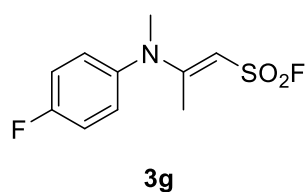

*(E)-2-((4-fluorophenyl)(methyl)amino)prop-1-ene-1-sulfonyl fluoride (3g)*. White solid,

212 mg, 86% yield. M.p. 61–63 °C. Purification by column chromatography on silica gel using petroleum ether / ethyl acetate = 10:1 (v/v) as eluent.  $^1\text{H NMR}$  (500 MHz,  $\text{CDCl}_3$ )  $\delta$  7.16 – 7.13 (m, 4H), 5.05 (s, 1H), 3.24 (s, 3H), 2.18 (s, 3H).  $^{19}\text{F NMR}$  (471 MHz,  $\text{CDCl}_3$ )  $\delta$  72.2 (s, 1F), -112.1 (m, 1F).  $^{13}\text{C NMR}$  (126 MHz,  $\text{CDCl}_3$ )  $\delta$  162.8 (d,  $J = 49.3$  Hz), 161.0, 140.6 (d,  $J = 3.5$  Hz), 128.9 (d,  $J = 8.7$  Hz), 117.2 (d,  $J = 23.1$  Hz), 86.3 (d,  $J = 24.4$  Hz), 41.7, 17.8. **HRMS-ESI** (m/z) calcd. for  $[\text{C}_{10}\text{H}_{12}\text{F}_2\text{NO}_2\text{S}]^+$  ( $[\text{M}+\text{H}]^+$ ): 248.0551, found: 248.0545.

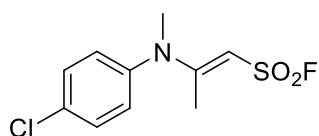

**3h**

*(E)*-2-((4-chlorophenyl)(methyl)amino)prop-1-ene-1-sulfonyl fluoride (**3h**). White solid, 236 mg, 90% yield. M.p. 77–79 °C. Purification by column chromatography on silica gel using petroleum ether / ethyl acetate = 10:1 (v/v) as eluent.  $^1\text{H NMR}$  (500 MHz,  $\text{CDCl}_3$ )  $\delta$  7.43 (d,  $J = 8.5$  Hz, 2H), 7.09 (d,  $J = 8.7$  Hz, 2H), 5.07 (s, 1H), 3.24 (s, 3H), 2.19 (s, 3H).  $^{19}\text{F NMR}$  (471 MHz,  $\text{CDCl}_3$ )  $\delta$  72.1 (s, 1F).  $^{13}\text{C NMR}$  (126 MHz,  $\text{CDCl}_3$ )  $\delta$  162.3, 143.0, 134.4, 130.5, 128.5, 86.8 (d,  $J = 24.6$  Hz), 41.6, 17.8. **HRMS-ESI** (m/z) calcd. for  $[\text{C}_{10}\text{H}_{12}\text{ClFNO}_2\text{S}]^+$  ( $[\text{M}+\text{H}]^+$ ): 264.0256, found: 264.0259.

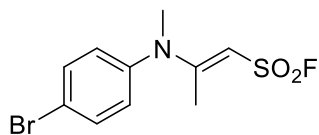

**3i**

*(E)*-2-((4-bromophenyl)(methyl)amino)prop-1-ene-1-sulfonyl fluoride (**3i**). Yellow solid, 278 mg, 91% yield. M.p. 96–98 °C. Purification by column chromatography on silica gel using petroleum ether / ethyl acetate = 10:1 (v/v) as eluent.  $^1\text{H NMR}$  (500 MHz,  $\text{CDCl}_3$ )  $\delta$  7.58 (d,  $J = 8.5$  Hz, 2H), 7.03 (d,  $J = 8.5$  Hz, 2H), 5.08 (s, 1H), 3.24 (s, 3H), 2.19 (s, 3H).  $^{19}\text{F NMR}$  (471 MHz,  $\text{CDCl}_3$ )  $\delta$  72.1 (s, 1F).  $^{13}\text{C NMR}$  (126

MHz, CDCl<sub>3</sub>)  $\delta$  162.2, 143.6, 133.5, 128.8, 122.3, 86.9 (d,  $J = 24.6$  Hz), 41.6, 17.8.

**HRMS-ESI** (m/z) calcd. for [C<sub>10</sub>H<sub>12</sub>BrFNO<sub>2</sub>S]<sup>+</sup> ([M+H]<sup>+</sup>): 307.9751, found: 307.9759.

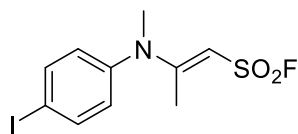

**3j**

(*E*)-2-((4-iodophenyl)(methyl)amino)prop-1-ene-1-sulfonyl fluoride (**3j**). Purple solid, 322 mg, 91% yield. M.p. 124–126 °C. Purification by column chromatography on silica gel using petroleum ether / ethyl acetate = 10:1 (v/v) as eluent. **<sup>1</sup>H NMR** (500 MHz, CDCl<sub>3</sub>)  $\delta$  7.80 – 7.77 (m, 2H), 6.91 – 6.88 (m, 2H), 5.08 (s, 1H), 3.23 (s, 3H), 2.19 (s, 3H). **<sup>19</sup>F NMR** (471 MHz, CDCl<sub>3</sub>)  $\delta$  72.1 (s, 1F). **<sup>13</sup>C NMR** (126 MHz, CDCl<sub>3</sub>)  $\delta$  162.1, 144.3, 139.5, 129.0, 93.7, 87.0 (d,  $J = 24.8$  Hz), 41.5, 17.9. **HRMS-ESI** (m/z) calcd. for [C<sub>10</sub>H<sub>12</sub>FINO<sub>2</sub>S]<sup>+</sup> ([M+H]<sup>+</sup>): 355.9612, found: 355.9617.

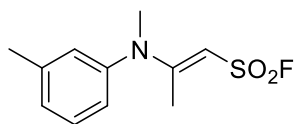

**3k**

(*E*)-2-(methyl(*m*-tolyl)amino)prop-1-ene-1-sulfonyl fluoride (**3k**). White solid, 230 mg, 95% yield. M.p. 84–86 °C. Purification by column chromatography on silica gel using petroleum ether / ethyl acetate = 10:1 (v/v) as eluent. **<sup>1</sup>H NMR** (500 MHz, CDCl<sub>3</sub>)  $\delta$  7.32 (t,  $J = 7.7$  Hz, 1H), 7.18 (d,  $J = 7.6$  Hz, 1H), 6.94 – 6.91 (m, 2H), 5.04 (s, 1H), 3.24 (s, 3H), 2.38 (s, 3H), 2.19 (s, 3H). **<sup>19</sup>F NMR** (471 MHz, CDCl<sub>3</sub>)  $\delta$  72.3 (s, 1F). **<sup>13</sup>C NMR** (126 MHz, CDCl<sub>3</sub>)  $\delta$  162.7, 144.5, 140.5, 130.0, 129.2, 127.5, 123.9, 85.3 (d,  $J = 24.1$  Hz), 41.6, 21.4, 17.8. **HRMS-ESI** (m/z) calcd. for [C<sub>11</sub>H<sub>15</sub>FNO<sub>2</sub>S]<sup>+</sup> ([M+H]<sup>+</sup>): 244.0802, found: 244.0798.

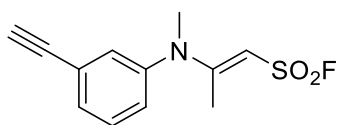

**3l**

(*E*)-2-((3-ethynylphenyl)(methyl)amino)prop-1-ene-1-sulfonyl fluoride (**3l**). White solid, 222 mg, 92% yield. M.p. 88–90 °C. Purification by column chromatography on silica gel using petroleum ether / ethyl acetate = 10:1 (v/v) as eluent.  $^1\text{H NMR}$  (500 MHz,  $\text{CDCl}_3$ )  $\delta$  7.48 (d,  $J = 7.5$  Hz, 1H), 7.40 (t,  $J = 8.0$  Hz, 1H), 7.26 (s, 1H), 7.13 (d,  $J = 8.0$  Hz, 1H), 5.06 (s, 1H), 3.23 (s, 3H), 3.16 (s, 1H), 2.18 (s, 3H).  $^{19}\text{F NMR}$  (471 MHz,  $\text{CDCl}_3$ )  $\delta$  72.2 (s, 1F).  $^{13}\text{C NMR}$  (126 MHz,  $\text{CDCl}_3$ )  $\delta$  162.3, 144.6, 132.1, 130.6, 130.4, 127.7, 124.5, 86.6 (d,  $J = 24.4$  Hz), 82.0, 79.3, 41.5, 17.8. **HRMS-ESI** (m/z) calcd. for  $[\text{C}_{12}\text{H}_{13}\text{FNO}_2\text{S}]^+$  ( $[\text{M}+\text{H}]^+$ ): 254.0646, found: 254.0637.

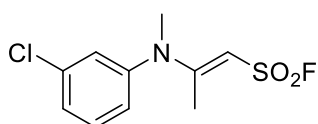

**3m**

(*E*)-2-((3-chlorophenyl)(methyl)amino)prop-1-ene-1-sulfonyl fluoride (**3m**). White solid, 236 mg, 90% yield. M.p. 108–110 °C. Purification by column chromatography on silica gel using petroleum ether / ethyl acetate = 10:1 (v/v) as eluent.  $^1\text{H NMR}$  (500 MHz,  $\text{CDCl}_3$ )  $\delta$  7.42 – 7.36 (m, 2H), 7.17 (t,  $J = 2.0$  Hz, 1H), 7.07 – 7.04 (m, 1H), 5.09 (s, 1H), 3.25 (s, 3H), 2.20 (s, 3H).  $^{19}\text{F NMR}$  (471 MHz,  $\text{CDCl}_3$ )  $\delta$  72.1 (s, 1F).  $^{13}\text{C NMR}$  (126 MHz,  $\text{CDCl}_3$ )  $\delta$  162.2, 145.6, 135.7, 131.3, 128.8, 127.5, 125.5, 87.0 (d,  $J = 24.7$  Hz), 41.5, 17.8. **HRMS-ESI** (m/z) calcd. for  $[\text{C}_{10}\text{H}_{12}\text{ClFNO}_2\text{S}]^+$  ( $[\text{M}+\text{H}]^+$ ): 264.0256, found: 264.0256.

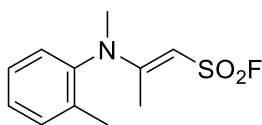

**3n**

(*E*)-2-(methyl(*o*-tolyl)amino)prop-1-ene-1-sulfonyl fluoride (**3n**). White solid, 225 mg,

93% yield. M.p. 73–75 °C. Purification by column chromatography on silica gel using petroleum ether / ethyl acetate = 10:1 (v/v) as eluent.  $^1\text{H NMR}$  (500 MHz,  $\text{CDCl}_3$ )  $\delta$  7.32 (t,  $J = 7.7$  Hz, 1H), 7.18 (d,  $J = 7.6$  Hz, 1H), 6.94 – 6.91 (m, 2H), 5.04 (s, 1H), 3.24 (s, 3H), 2.38 (s, 3H), 2.19 (s, 3H).  $^{19}\text{F NMR}$  (471 MHz,  $\text{CDCl}_3$ )  $\delta$  72.3 (s, 1F).  $^{13}\text{C NMR}$  (126 MHz,  $\text{CDCl}_3$ )  $\delta$  162.7, 144.5, 140.5, 130.0, 129.2, 127.5, 123.9, 85.3 (d,  $J = 24.1$  Hz), 41.6, 21.4, 17.8. **HRMS-ESI** (m/z) calcd. for  $[\text{C}_{11}\text{H}_{15}\text{FNO}_2\text{S}]^+$  ( $[\text{M}+\text{H}]^+$ ): 244.0802, found: 244.0798.

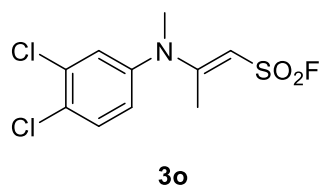

*(E)*-2-((3,4-dichlorophenyl)(methyl)amino)prop-1-ene-1-sulfonyl fluoride (**3o**). White solid, 264 mg, 89% yield. M.p. 102–104 °C. Purification by column chromatography on silica gel using petroleum ether / ethyl acetate = 10:1 (v/v) as eluent.  $^1\text{H NMR}$  (500 MHz,  $\text{CDCl}_3$ )  $\delta$  7.54 (d,  $J = 8.5$  Hz, 1H), 7.29 (d,  $J = 2.5$  Hz, 1H), 7.03 (dd,  $J_1 = 8.5$  Hz,  $J_2 = 2.5$  Hz, 1H), 5.11 (s, 1H), 3.24 (s, 3H), 2.21 (s, 3H).  $^{19}\text{F NMR}$  (471 MHz,  $\text{CDCl}_3$ )  $\delta$  72.0 (s, 1F).  $^{13}\text{C NMR}$  (126 MHz,  $\text{CDCl}_3$ )  $\delta$  161.9, 143.7, 134.2, 133.0, 131.9, 129.3, 126.7, 88.0 (d,  $J = 24.8$  Hz), 41.6, 17.8. **HRMS-ESI** (m/z) calcd. for  $[\text{C}_{10}\text{H}_{11}\text{Cl}_2\text{FNO}_2\text{S}]^+$  ( $[\text{M}+\text{H}]^+$ ): 297.9866, found: 297.9875.

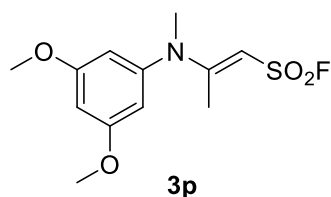

*(E)*-2-((3,5-dimethoxyphenyl)(methyl)amino)prop-1-ene-1-sulfonyl fluoride (**3p**). White solid, 271 mg, 94% yield. M.p. 141–143 °C. Purification by column chromatography on silica gel using petroleum ether / ethyl acetate = 10:1 (v/v) as eluent.  $^1\text{H NMR}$  (500 MHz,  $\text{CDCl}_3$ )  $\delta$  6.45 (t,  $J = 2.5$  Hz, 1H), 6.26 (d,  $J = 2.5$  Hz, 2H), 5.06 (s, 1H), 3.80 (s, 6H), 3.23 (s, 3H), 2.23 (s, 3H).  $^{19}\text{F NMR}$  (471 MHz,  $\text{CDCl}_3$ )

$\delta$  72.2 (s, 1F).  $^{13}\text{C}$  NMR (126 MHz,  $\text{CDCl}_3$ )  $\delta$  162.5, 161.9, 146.1, 105.3, 100.3, 85.6 (d,  $J = 24.2$  Hz), 55.7, 41.4, 17.7. **HRMS-ESI** (m/z) calcd. for  $[\text{C}_{12}\text{H}_{17}\text{FNO}_4\text{S}]^+$  ( $[\text{M}+\text{H}]^+$ ): 290.0857, found: 290.0863.

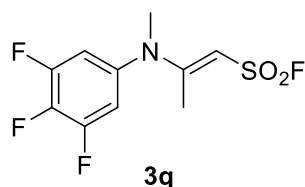

(*E*)-2-(methyl(3,4,5-trifluorophenyl)amino)prop-1-ene-1-sulfonyl fluoride (**3q**). White solid, 219 mg, 83% yield. M.p. 89–91 °C. Purification by column chromatography on silica gel using petroleum ether / ethyl acetate = 10:1 (v/v) as eluent.  $^1\text{H}$  NMR (500 MHz,  $\text{CDCl}_3$ )  $\delta$  6.88 – 6.85 (m, 2H), 5.11 (s, 1H), 3.23 (s, 3H), 2.21 (s, 3H).  $^{19}\text{F}$  NMR (471 MHz,  $\text{CDCl}_3$ )  $\delta$  71.9 (s, 1F), -130.39 (dd,  $J_1 = 20.3$ ,  $J_2 = 7.1$  Hz, 2F), -158.52 – -158.62 (m, 1F).  $^{13}\text{C}$  NMR (126 MHz,  $\text{CDCl}_3$ )  $\delta$  161.8, 151.8 (dq,  $J_1 = 254.8$  Hz,  $J_2 = 5.04$  Hz), 140.0 (dt,  $J_1 = 255.7$  Hz,  $J_2 = 15.0$  Hz), 139.8 – 139.6 (m), 112.5 (dd,  $J_1 = 16.8$  Hz,  $J_2 = 5.7$  Hz), 88.7 (d,  $J = 25.2$  Hz), 41.5, 17.7. **HRMS-ESI** (m/z) calcd. for  $[\text{C}_{10}\text{H}_{10}\text{F}_4\text{NO}_2\text{S}]^+$  ( $[\text{M}+\text{H}]^+$ ): 284.0363, found: 284.0359.

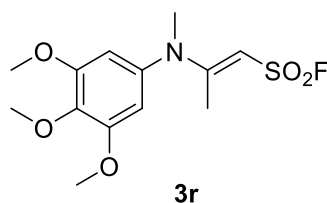

(*E*)-2-(methyl(3,4,5-trimethoxyphenyl)amino)prop-1-ene-1-sulfonyl fluoride (**3r**). White solid, 303 mg, 95% yield. M.p. 156–158 °C. Purification by column chromatography on silica gel using petroleum ether / ethyl acetate = 10:1 (v/v) as eluent.  $^1\text{H}$  NMR (500 MHz,  $\text{CDCl}_3$ )  $\delta$  6.34 (s, 2H), 5.04 (s, 1H), 3.86 (s, 3H), 3.85 (s, 6H), 3.24 (s, 3H), 2.23 (s, 3H).  $^{19}\text{F}$  NMR (471 MHz,  $\text{CDCl}_3$ )  $\delta$  72.3 (s, 1F).  $^{13}\text{C}$  NMR (126 MHz,  $\text{CDCl}_3$ )  $\delta$  162.7, 154.2, 140.1, 138.1, 104.3, 85.5 (d,  $J = 24.3$  Hz), 61.1, 56.5, 41.6, 17.7. **HRMS-ESI** (m/z) calcd. for  $[\text{C}_{13}\text{H}_{19}\text{FNO}_5\text{S}]^+$  ( $[\text{M}+\text{H}]^+$ ): 320.0962,

found: 320.0957.

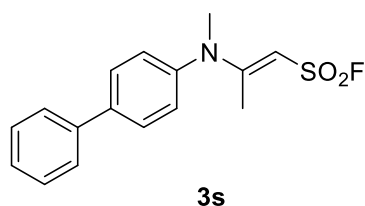

*(E)*-2-([1,1'-biphenyl]-4-yl(methyl)amino)prop-1-ene-1-sulfonyl fluoride (**3s**). White solid, 280 mg, 92% yield. M.p. 131–133 °C. Purification by column chromatography on silica gel using petroleum ether / ethyl acetate = 10:1 (v/v) as eluent.  $^1\text{H NMR}$  (500 MHz,  $\text{CDCl}_3$ )  $\delta$  7.66 (d,  $J = 8.5$  Hz, 2H), 7.59 (d,  $J = 7.0$  Hz, 2H), 7.48 (t,  $J = 8.0$  Hz, 2H), 7.40 (t,  $J = 7.5$  Hz, 1H), 7.21 (d,  $J = 8.5$  Hz, 2H), 5.11 (s, 1H), 3.30 (s, 3H), 2.25 (s, 3H).  $^{19}\text{F NMR}$  (471 MHz,  $\text{CDCl}_3$ )  $\delta$  72.3 (s, 1F).  $^{13}\text{C NMR}$  (126 MHz,  $\text{CDCl}_3$ )  $\delta$  162.6, 143.6, 141.5, 139.8, 129.1, 128.9, 128.1, 127.4, 127.2, 86.1 (d,  $J = 24.2$  Hz), 41.7, 18.0. **HRMS-ESI** (m/z) calcd. for  $[\text{C}_{16}\text{H}_{17}\text{FNO}_2\text{S}]^+$  ( $[\text{M}+\text{H}]^+$ ): 306.0959, found: 306.0964.

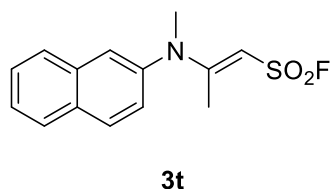

*(E)*-2-(methyl(naphthalen-2-yl)amino)prop-1-ene-1-sulfonyl fluoride (**3t**). White solid, 253 mg, 91% yield. M.p. 121–123 °C. Purification by column chromatography on silica gel using petroleum ether / ethyl acetate = 10:1 (v/v) as eluent.  $^1\text{H NMR}$  (500 MHz,  $\text{CDCl}_3$ )  $\delta$  7.99 – 7.88 (m, 3H), 7.67 (s, 1H), 7.63 – 7.61 (m, 2H), 7.31 – 7.24 (m, 1H), 5.18 (s, 1H), 3.39 (s, 3H), 2.29 (s, 3H).  $^{19}\text{F NMR}$  (471 MHz,  $\text{CDCl}_3$ )  $\delta$  72.4 (s, 1F).  $^{13}\text{C NMR}$  (126 MHz,  $\text{CDCl}_3$ )  $\delta$  162.7, 141.8, 133.7, 132.6, 130.5, 128.0, 128.0, 127.4, 127.3, 125.7, 124.6, 86.0 (d,  $J = 24.1$  Hz), 41.7, 18.0. **HRMS-ESI** (m/z) calcd. for  $[\text{C}_{14}\text{H}_{15}\text{FNO}_2\text{S}]^+$  ( $[\text{M}+\text{H}]^+$ ): 280.0802, found: 280.0798.

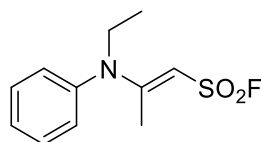

**3u**

*(E)*-2-(ethyl(phenyl)amino)prop-1-ene-1-sulfonyl fluoride (**3u**). White solid, 217 mg, 95% yield. M.p. 79–81 °C. Purification by column chromatography on silica gel using petroleum ether / ethyl acetate = 10:1 (v/v) as eluent.  $^1\text{H NMR}$  (500 MHz,  $\text{CDCl}_3$ )  $\delta$  7.62 (t,  $J = 7.5$  Hz, 2H), 7.55 (t,  $J = 7.4$  Hz, 1H), 7.27 (d,  $J = 7.0$  Hz, 2H), 5.17 (s, 1H), 3.80 (q,  $J = 7.0$  Hz, 2H), 2.35 (s, 3H), 1.36 (t,  $J = 7.5$  Hz, 3H).  $^{19}\text{F NMR}$  (471 MHz,  $\text{CDCl}_3$ )  $\delta$  72.6 (s, 1F).  $^{13}\text{C NMR}$  (126 MHz,  $\text{CDCl}_3$ )  $\delta$  162.0, 142.8, 130.3, 128.6, 127.9, 84.8 (d,  $J = 23.9$  Hz), 48.4, 17.7, 12.0. **HRMS-ESI** (m/z) calcd. for  $[\text{C}_{11}\text{H}_{15}\text{FNO}_2\text{S}]^+$  ( $[\text{M}+\text{H}]^+$ ): 244.0802, found: 244.0792.

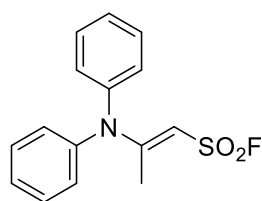

**3v**

*(E)*-2-(diphenylamino)prop-1-ene-1-sulfonyl fluoride (**3v**). White solid, 198 mg, 68% yield. M.p. 103–105 °C. Purification by column chromatography on silica gel using petroleum ether / ethyl acetate = 10:1 (v/v) as eluent.  $^1\text{H NMR}$  (500 MHz,  $\text{CDCl}_3$ )  $\delta$  7.45 (t,  $J = 7.5$  Hz, 4H), 7.35 (t,  $J = 7.5$  Hz, 2H), 7.27 (d,  $J = 7.0$  Hz, 4H), 5.12 (s, 1H), 2.36 (s, 3H).  $^{19}\text{F NMR}$  (471 MHz,  $\text{CDCl}_3$ )  $\delta$  71.9 (s, 1F).  $^{13}\text{C NMR}$  (126 MHz,  $\text{CDCl}_3$ )  $\delta$  163.0, 143.3, 130.3, 128.2, 127.9, 90.9 (d,  $J = 24.4$  Hz), 18.5. **HRMS-ESI** (m/z) calcd. for  $[\text{C}_{15}\text{H}_{15}\text{FNO}_2\text{S}]^+$  ( $[\text{M}+\text{H}]^+$ ): 292.0802, found: 292.0811.

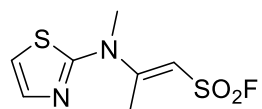

**3w**

*(E)*-2-(methyl(thiazol-2-yl)amino)prop-1-ene-1-sulfonyl fluoride (**3w**). Light yellow



solid, 186 mg, 79% yield. M.p. 158–160 °C. Purification by column chromatography on silica gel using petroleum ether / ethyl acetate = 3:1 (v/v) as eluent.  $^1\text{H NMR}$  (500 MHz,  $\text{CDCl}_3$ )  $\delta$  7.60 (d,  $J = 3.6$  Hz, 1H), 7.31 (d,  $J = 3.6$  Hz, 1H), 5.57 (s, 1H), 3.37 (s, 3H), 2.36 (s, 3H).  $^{19}\text{F NMR}$  (471 MHz,  $\text{CDCl}_3$ )  $\delta$  71.4 (s, 1F).  $^{13}\text{C NMR}$  (126 MHz,  $\text{CDCl}_3$ )  $\delta$  164.4, 161.3, 140.4, 119.8, 93.1 (d,  $J = 25.4$  Hz), 41.4, 17.8. **HRMS-ESI** (m/z) calcd. for  $[\text{C}_7\text{H}_{10}\text{FN}_2\text{O}_2\text{S}_2]^+$  ( $[\text{M}+\text{H}]^+$ ): 237.0162, found: 237.0165.

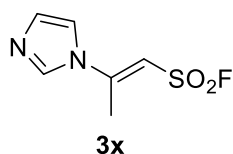

(*E*)-2-(1*H*-imidazol-1-yl)prop-1-ene-1-sulfonyl fluoride (**3x**). Light yellow solid, 154 mg, 81% yield. M.p. 135–137 °C. Purification by column chromatography on silica gel using petroleum ether / ethyl acetate = 5:1 (v/v) as eluent.  $^1\text{H NMR}$  (500 MHz,  $\text{CDCl}_3$ )  $\delta$  7.93 (s, 1H), 7.25 (t,  $J = 1.6$  Hz, 1H), 7.21 (d,  $J = 1.5$  Hz, 1H), 6.54 (s, 1H), 2.74 (s, 3H).  $^{19}\text{F NMR}$  (471 MHz,  $\text{CDCl}_3$ )  $\delta$  67.0 (s, 1F).  $^{13}\text{C NMR}$  (126 MHz,  $\text{CDCl}_3$ )  $\delta$  151.1 (d,  $J = 2.7$  Hz), 135.6, 132.5, 116.6, 108.6 (d,  $J = 29.5$  Hz), 17.0. **HRMS-ESI** (m/z) calcd. for  $[\text{C}_6\text{H}_8\text{FN}_2\text{O}_2\text{S}]^+$  ( $[\text{M}+\text{H}]^+$ ): 191.0285, found: 191.0285.

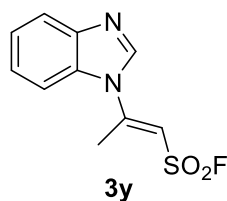

(*E*)-2-(1*H*-benzo[*d*]imidazol-1-yl)prop-1-ene-1-sulfonyl fluoride (**3y**). Light yellow solid, 134 mg, 56% yield. M.p. 158–160 °C. Purification by column chromatography on silica gel using petroleum ether / ethyl acetate = 5:1 (v/v) as eluent.  $^1\text{H NMR}$  (500 MHz,  $\text{CDCl}_3$ )  $\delta$  8.18 (s, 1H), 7.87 (dd,  $J = 7.6, 1.9$  Hz, 1H), 7.67 – 7.64 (m, 1H), 7.49 – 7.40 (m, 2H), 6.76 (s, 1H), 2.90 (s, 3H).  $^{19}\text{F NMR}$  (471 MHz,  $\text{CDCl}_3$ )  $\delta$  70.0 (s, 1F).  $^{13}\text{C NMR}$  (126 MHz,  $\text{CDCl}_3$ )  $\delta$  151.9 (d,  $J = 2.4$  Hz), 145.1, 140.7, 131.6, 125.7, 125.0, 121.9, 112.4, 110.8 (d,  $J = 29.2$  Hz), 18.5. **HRMS-ESI** (m/z) calcd. for  $[\text{C}_{10}\text{H}_{10}\text{FN}_2\text{O}_2\text{S}]^+$  ( $[\text{M}+\text{H}]^+$ ): 241.0442, found: 241.0443.

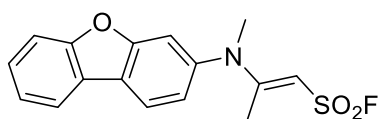

**3z**

*(E)*-2-((dibenzo[*b,d*]furan-3-yl(methyl)amino)prop-1-ene-1-sulfonyl fluoride (**3u**).

Light yellow solid, 293 mg, 92% yield. M.p. 154–156 °C. Purification by column chromatography on silica gel using petroleum ether / ethyl acetate = 7:1 (v/v) as eluent. <sup>1</sup>H NMR (500 MHz, CDCl<sub>3</sub>) δ 7.99 (dd, *J*<sub>1</sub> = 13.5 Hz, *J*<sub>2</sub> = 8.5 Hz, 2H), 7.61 (d, *J* = 8.5 Hz, 1H), 7.54 – 7.50 (m, 1H), 7.42 – 7.37 (m, 2H), 7.13 (dd, *J*<sub>1</sub> = 8.5 Hz, *J*<sub>2</sub> = 2.0 Hz, 1H), 5.14 (s, 1H), 3.34 (s, 3H), 2.24 (s, 3H). <sup>19</sup>F NMR (471 MHz, CDCl<sub>3</sub>) δ 72.2 (s, 1F). <sup>13</sup>C NMR (126 MHz, CDCl<sub>3</sub>) δ 162.6, 157.2, 156.5, 143.3, 128.2, 124.6, 123.5, 123.3, 121.9, 121.8, 121.0, 112.1, 110.8, 86.5 (d, *J* = 24.6 Hz), 42.0, 18.0. HRMS-ESI (m/z) calcd. for [C<sub>16</sub>H<sub>15</sub>FNO<sub>3</sub>S]<sup>+</sup> ([M+H]<sup>+</sup>): 320.0751, found: 320.0755.

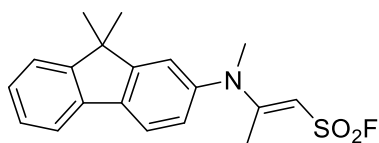

**3aa**

*(E)*-2-((9,9-dimethyl-9H-fluoren-2-yl)(methyl)amino)prop-1-ene-1-sulfonyl fluoride

(**3t**). Light yellow solid, 314 mg, 91% yield. M.p. 115–117 °C. Purification by column chromatography on silica gel using petroleum ether / ethyl acetate = 10:1 (v/v) as eluent. <sup>1</sup>H NMR (500 MHz, CDCl<sub>3</sub>) δ 7.77 – 7.73 (m, 2H), 7.48 – 7.46 (m, 1H), 7.38 – 7.37 (m, 2H), 7.19 (d, *J* = 2.0 Hz, 1H), 7.10 (dd, *J*<sub>1</sub> = 8.0 Hz, *J*<sub>2</sub> = 2.0 Hz, 1H), 5.13 (s, 1H), 3.32 (s, 3H), 2.24 (s, 3H), 1.51 (s, 6H). <sup>19</sup>F NMR (471 MHz, CDCl<sub>3</sub>) δ 72.4 (s, 1F). <sup>13</sup>C NMR (126 MHz, CDCl<sub>3</sub>) δ 162.7, 155.8, 153.9, 143.5, 139.5, 137.8, 128.1, 127.4, 125.8, 122.6, 121.3, 121.2, 120.4, 85.5 (d, *J* = 24.2 Hz), 47.3, 41.9, 27.1, 18.0. HRMS-ESI (m/z) calcd. for [C<sub>19</sub>H<sub>21</sub>FNO<sub>2</sub>S]<sup>+</sup> ([M+H]<sup>+</sup>): 346.1272, found: 346.1265.

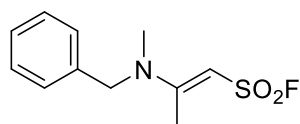

**3ab**

(*E*)-2-(benzyl(methyl)amino)prop-1-ene-1-sulfonyl fluoride (**3aa**). White solid, 192 mg, 79% yield. M.p. 94–96 °C. Purification by column chromatography on silica gel using petroleum ether / ethyl acetate = 10:1 (v/v) as eluent.  $^1\text{H NMR}$  (500 MHz,  $\text{CDCl}_3$ )  $\delta$  7.39 (t,  $J = 8.0$  Hz, 2H), 7.33 (t,  $J = 7.0$  Hz, 1H), 7.11 (d,  $J = 7.0$  Hz, 2H), 5.01 (s, 1H), 4.57 (s, 2H), 2.98 (s, 3H), 2.43 (s, 3H).  $^{19}\text{F NMR}$  (471 MHz,  $\text{CDCl}_3$ )  $\delta$  73.0 (s, 1F).  $^{13}\text{C NMR}$  (126 MHz,  $\text{CDCl}_3$ )  $\delta$  162.8, 129.3, 128.2, 126.3, 84.2 (d,  $J = 24.2$  Hz), 55.9, 39.2, 16.4. **HRMS-ESI** (m/z) calcd. for  $[\text{C}_{11}\text{H}_{15}\text{FNO}_2\text{S}]^+$  ( $[\text{M}+\text{H}]^+$ ): 244.0802, found: 244.0812.

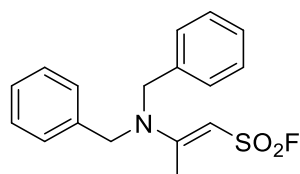

**3ac**

(*E*)-2-(dibenzylamino)prop-1-ene-1-sulfonyl fluoride (**3ab**). White solid, 277 mg, 87% yield. M.p. 105–107 °C. Purification by column chromatography on silica gel using petroleum ether / ethyl acetate = 10:1 (v/v) as eluent.  $^1\text{H NMR}$  (500 MHz,  $\text{CDCl}_3$ )  $\delta$  7.40 (t,  $J = 8.0$  Hz, 4H), 7.34 (t,  $J = 7.5$  Hz, 2H), 7.14 (d,  $J = 7.1$  Hz, 4H), 5.16 (s, 1H), 4.57 (s, 4H), 2.52 (s, 3H).  $^{19}\text{F NMR}$  (471 MHz,  $\text{CDCl}_3$ )  $\delta$  73.0 (s, 1F).  $^{13}\text{C NMR}$  (126 MHz,  $\text{CDCl}_3$ )  $\delta$  162.9, 134.7, 129.4, 128.2, 126.4, 85.4 (d,  $J = 24.3$  Hz), 54.0, 16.6. **HRMS-ESI** (m/z) calcd. for  $[\text{C}_{17}\text{H}_{19}\text{FNO}_2\text{S}]^+$  ( $[\text{M}+\text{H}]^+$ ): 320.1117, found: 320.1115.

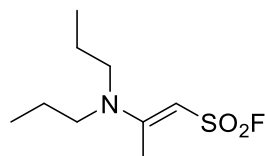

**3ad**

(*E*)-2-(dipropylamino)prop-1-ene-1-sulfonyl fluoride (**3ac**). White solid, 187 mg, 84%

yield. M.p. 47–49 °C. Purification by column chromatography on silica gel using petroleum ether / ethyl acetate = 10:1 (v/v) as eluent.  $^1\text{H NMR}$  (500 MHz,  $\text{CDCl}_3$ )  $\delta$  4.83 (s, 1H), 3.18 (t,  $J = 7.5$  Hz, 4H), 2.34 (s, 3H), 1.66 – 1.59 (m, 4H), 0.93 (t,  $J = 7.5$  Hz, 6H).  $^{19}\text{F NMR}$  (471 MHz,  $\text{CDCl}_3$ )  $\delta$  73.1 (s, 1F).  $^{13}\text{C NMR}$  (126 MHz,  $\text{CDCl}_3$ )  $\delta$  161.5, 82.0 (d,  $J = 23.7$  Hz), 52.9, 16.2, 11.3. **HRMS-ESI** (m/z) calcd. for  $[\text{C}_9\text{H}_{19}\text{FNO}_2\text{S}]^+$  ( $[\text{M}+\text{H}]^+$ ): 224.1115, found: 224.1120.

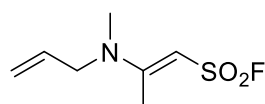

**3ae**

(*E*)-2-(allyl(methyl)amino)prop-1-ene-1-sulfonyl fluoride (**3ad**). White solid, 194 mg, 75% yield. M.p. 46–48 °C. Purification by column chromatography on silica gel using petroleum ether / ethyl acetate = 10:1 (v/v) as eluent.  $^1\text{H NMR}$  (500 MHz,  $\text{CDCl}_3$ )  $\delta$  5.79 – 5.72 (m, 1H), 5.27 (d,  $J = 10.5$  Hz, 1H), 5.12 (d,  $J = 17.0$  Hz, 1H), 4.91 (s, 1H), 3.93 (s, 2H), 2.95 (s, 3H), 2.35 (s, 3H).  $^{19}\text{F NMR}$  (471 MHz,  $\text{CDCl}_3$ )  $\delta$  72.9 (s, 1F).  $^{13}\text{C NMR}$  (126 MHz,  $\text{CDCl}_3$ )  $\delta$  162.6, 131.3, 117.7, 83.4 (d,  $J = 23.7$  Hz), 54.9, 38.8, 16.0. **HRMS-ESI** (m/z) calcd. for  $[\text{C}_7\text{H}_{13}\text{FNO}_2\text{S}]^+$  ( $[\text{M}+\text{H}]^+$ ): 194.0646, found: 194.0651.

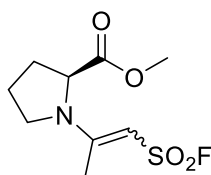

**3af**

Methyl(*Z/E*) (1-(fluorosulfonyl)prop-1-en-2-yl)glycinate (**3af**). White solid, 202 mg, 81% yield. M.p. 66–68 °C. Purification by column chromatography on silica gel using petroleum ether / ethyl acetate = 10:1 (v/v) as eluent.  $^1\text{H NMR}$  (500 MHz,  $\text{DMSO}-d_6$ )  $\delta$  5.06 (s, 2.2H), 4.92 – 4.79 (m, 2.2H), 4.70 (s, 1H), 4.44 (dd,  $J = 8.9, 2.3$  Hz, 1H), 3.71 (d,  $J = 6.0$  Hz, 9.6H), 3.64 – 3.58 (m, 1H), 3.39 – 3.37 (m, 3.21H), 3.29 – 3.24 (m, 2.2H), 2.37 (s, 3H), 2.27 – 2.24 (m, 1H), 2.22 (s, 6.62H), 2.22 – 2.16 (m, 2.25H),

2.16 – 1.76 (m, 10.23H). **<sup>19</sup>F NMR** (471 MHz, DMSO-*d*<sub>6</sub>) δ 75.2 (s, 1F), 75.1 (s, 1F). **<sup>13</sup>C NMR** (126 MHz, DMSO-*d*<sub>6</sub>) δ 172.3, 171.4, 162.3, 161.7, 82.3 (d, *J* = 22.1 Hz), 81.7 (d, *J* = 22.3 Hz), 61.4, 53.2, 52.9, 49.9, 49.8, 30.4, 30.4, 23.4, 23.2, 17.6, 17.1. **HRMS-ESI** (*m/z*) calcd. for [C<sub>9</sub>H<sub>15</sub>FNO<sub>4</sub>S]<sup>+</sup> ([M+H]<sup>+</sup>): 252.0700, found: 252.0698.

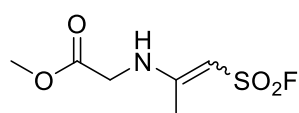

**3ag**

*Methyl(Z/E) (1-(fluorosulfonyl)prop-1-en-2-yl) glycinate (3ag)*. White solid, 184 mg, 87% yield. M.p. 41–43 °C. Purification by column chromatography on silica gel using petroleum ether / ethyl acetate = 5:1 (v/v) as eluent. **<sup>1</sup>H NMR** (500 MHz, DMSO-*d*<sub>6</sub>) δ 8.24 (t, *J* = 6.0 Hz, 1H), 7.65 (s, 0.1H), 5.06 (s, 0.1H), 5.04 (s, 1H), 4.21 (d, *J* = 5.8 Hz, 0.2H), 4.03 (d, *J* = 6.0 Hz, 2H), 3.71 (s, 0.3H), 3.70 (s, 3H), 2.24 (s, 3H), 2.05 – 1.89 (m, 0.3H). **<sup>19</sup>F NMR** (471 MHz, DMSO-*d*<sub>6</sub>) δ 75.0 (s, 1F), 73.2 (s, 1F). **<sup>13</sup>C NMR** (126 MHz, DMSO-*d*<sub>6</sub>) δ 170.4, 169.3, 164.1, 163.6, 80.2 (d, *J* = 22.3 Hz), 77.6 (d, *J* = 20.6 Hz), 52.7, 52.5, 45.1, 44.7, 20.0, 19.1. **HRMS-ESI** (*m/z*) calcd. for [C<sub>6</sub>H<sub>11</sub>FNO<sub>4</sub>S]<sup>+</sup> ([M+H]<sup>+</sup>): 212.0387, found: 212.0381.

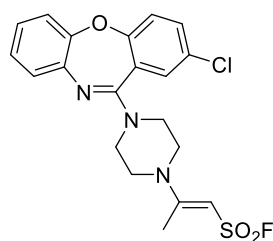

**3ah**

*(E)-2-(4-(2-chlorodibenzo[b,f][1,4]oxazepin-11-yl)piperazin-1-yl)prop-1-ene-1-sulfonyl fluoride (3ah)*. White solid, 379 mg, 87% yield. M.p. 185–187 °C. Purification by column chromatography on silica gel using petroleum ether / ethyl acetate = 3:1 (v/v) as eluent. **<sup>1</sup>H NMR** (500 MHz, CDCl<sub>3</sub>) δ 7.44 – 7.42 (m, 1H), 7.31 (d, *J* = 2.5 Hz, 1H), 7.22 (d, *J* = 8.5 Hz, 1H), 7.16 – 7.02 (m, 4H), 5.09 (s, 1H), 3.61 (s, 4H), 3.49 (s, 4H), 2.38 (s, 3H). **<sup>19</sup>F NMR** (471 MHz, CDCl<sub>3</sub>) δ 73.0 (s, 1F). **<sup>13</sup>C NMR** (126 MHz,

CDCl<sub>3</sub>)  $\delta$  162.1, 159.5, 158.3, 151.8, 139.7, 133.2, 130.6, 128.8, 127.2, 126.1, 125.4, 124.5, 123.1, 120.4, 86.4 (d,  $J = 24.5$  Hz), 46.1, 16.6. **HRMS-ESI** (m/z) calcd. for [C<sub>20</sub>H<sub>20</sub>Cl<sub>1</sub>FN<sub>3</sub>O<sub>3</sub>S]<sup>+</sup> ([M+H]<sup>+</sup>): 436.0892, found: 436.0892.

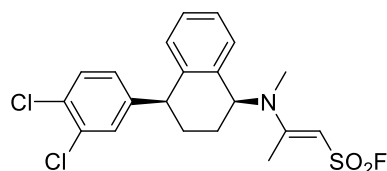

**3ai**

(*E*)-2-(((1*S*,4*S*)-4-(3,4-dichlorophenyl)-1,2,3,4-tetrahydronaphthalen-1-yl)(methyl)amino)prop-1-ene-1-sulfonyl fluoride (**3ai**). White solid, 358 mg, 84% yield. M.p. 176–178 °C. Purification by column chromatography on silica gel using petroleum ether / ethyl acetate = 3:1 (v/v) as eluent. <sup>1</sup>H NMR (500 MHz, CDCl<sub>3</sub>)  $\delta$  7.38 – 7.27 (m, 3H), 7.10 – 7.03 (m, 3H), 6.70 (d,  $J = 8.5$  Hz, 1H), 5.18 – 5.03 (m, 2H), 4.25 (t,  $J = 4.0$  Hz, 1H), 2.64 (s, 3H), 2.53 (s, 3H), 2.34 – 2.28 (m, 1H), 2.13 – 2.10 (m, 1H), 1.85 – 1.77 (m, 1H). <sup>19</sup>F NMR (471 MHz, CDCl<sub>3</sub>)  $\delta$  73.2 (s, 1F). <sup>13</sup>C NMR (126 MHz, CDCl<sub>3</sub>)  $\delta$  162.4, 146.4, 138.1, 135.0, 132.7, 131.5, 130.7, 128.5, 128.2, 128.0, 126.7, 84.6 (d,  $J = 24.1$  Hz), 58.4, 42.7, 34.5, 30.0, 23.0, 16.1. **HRMS-ESI** (m/z) calcd. for [C<sub>20</sub>H<sub>21</sub>Cl<sub>2</sub>FNO<sub>2</sub>S]<sup>+</sup> ([M+H]<sup>+</sup>): 428.0649, found: 428.0645.

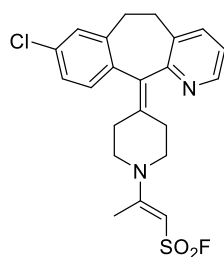

**3aj**

(*E*)-2-(4-(8-chloro-5,6-dihydro-11*H*-benzo[5,6]cyclohepta[1,2-*b*]pyridin-11-ylidene)piperidin-1-yl)prop-1-ene-1-sulfonyl fluoride (**3aj**). White solid, 341 mg, 79% yield. M.p. 159–161 °C. Purification by column chromatography on silica gel using petroleum ether / ethyl acetate = 3:1 (v/v) as eluent. <sup>1</sup>H NMR (500 MHz, CDCl<sub>3</sub>)  $\delta$  8.39 (dd,  $J = 3.5, 1.5$  Hz, 1H), 7.46 – 7.44 (m, 1H), 7.19 – 7.10 (m, 4H), 4.94 (s, 1H),

3.61 – 3.52 (m, 2H), 3.37 – 3.23 (m, 4H), 2.89 – 2.76 (m, 2H), 2.62 – 2.56 (m, 1H), 2.45 – 2.37 (m, 2H), 2.33 (s, 3H).  $^{19}\text{F}$  NMR (471 MHz,  $\text{CDCl}_3$ )  $\delta$  73.4 (s, 1F).  $^{13}\text{C}$  NMR (126 MHz,  $\text{CDCl}_3$ )  $\delta$  161.4, 156.2, 146.7, 137.9, 137.3, 135.7, 134.4, 133.4, 130.2, 129.1, 126.3, 122.6, 83.9 (d,  $J = 24.1$  Hz), 46.7, 46.6, 46.5, 46.4, 31.6, 31.5, 29.5, 16.5. **HRMS-ESI** (m/z) calcd. for  $[\text{C}_7\text{H}_{13}\text{FNO}_2\text{S}]^+$  ( $[\text{M}+\text{H}]^+$ ): 433.1147, found: 433.1147.

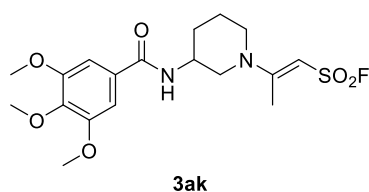

(*E*)-2-(3-(3,4,5-trimethoxybenzamido)piperidin-1-yl)prop-1-ene-1-sulfonyl fluoride (**3ak**). White solid, 379 mg, 91% yield. M.p. 177–179 °C. Purification by column chromatography on silica gel using petroleum ether / ethyl acetate = 10:1 (v/v) as eluent.  $^1\text{H}$  NMR (500 MHz,  $\text{CDCl}_3$ )  $\delta$  7.0 (s, 2H), 6.29 (d,  $J = 7.0$  Hz, 1H), 5.12 (s, 1H), 4.05 – 4.00 (m, 1H), 3.94 – 3.91 (m, 1H), 3.87 (s, 6H), 3.85 (s, 3H), 3.59 – 3.56 (m, 1H), 3.15 – 3.09 (m, 1H), 2.33 (s, 3H), 2.13 – 2.09 (m, 1H), 1.87 – 1.82 (m, 1H), 1.75 – 1.64 (m, 2H).  $^{19}\text{F}$  NMR (471 MHz,  $\text{CDCl}_3$ )  $\delta$  73.6 (s, 1F).  $^{13}\text{C}$  NMR (126 MHz,  $\text{CDCl}_3$ )  $\delta$  167.3, 162.0, 153.3, 141.2, 129.4, 104.5, 84.8 (d,  $J = 22.9$  Hz), 61.0, 56.4, 51.6, 47.7, 46.8, 29.6, 21.1, 16.6. **HRMS-ESI** (m/z) calcd. for  $[\text{C}_7\text{H}_{13}\text{FNO}_2\text{S}]^+$  ( $[\text{M}+\text{H}]^+$ ): 417.1490, found: 417.1493.

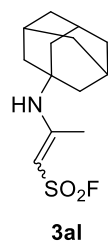

(*Z/E*)-2-(adamantan-1-ylamino)prop-1-ene-1-sulfonyl fluoride (**3al**). White solid, 196 mg, 72% yield. M.p. 196–198 °C. Purification by column chromatography on silica gel using petroleum ether / ethyl acetate = 3:1 (v/v) as eluent.  $^1\text{H}$  NMR (500 MHz,  $\text{CDCl}_3$ )  $\delta$  7.15 (s, 0.65H), 5.18 (s, 1H), 4.54 (s, 1H), 4.48 (d,  $J = 3.5$  Hz, 0.64H), 2.26

(s, 3H), 2.16 – 2.14 (m, 6.92H), 1.95 – 1.94 (m, 9.91H), 1.74 – 1.65 (m, 11.36H). <sup>19</sup>F NMR (471 MHz, CDCl<sub>3</sub>) δ 72.4 (s, 1F), 72.3 (s, 1F). <sup>13</sup>C NMR (126 MHz, CDCl<sub>3</sub>) δ 162.3, 158.5, 83.8 (d, *J* = 24.1 Hz), 78.2 (d, *J* = 23.6 Hz), 54.9, 54.0, 43.4, 41.2, 36.1, 36.0, 29.6, 29.4, 22.1, 22.0. HRMS-ESI (m/z) calcd. for [C<sub>13</sub>H<sub>21</sub>FNO<sub>2</sub>S]<sup>+</sup> ([M+H]<sup>+</sup>): 274.1272, found: 274.1272.

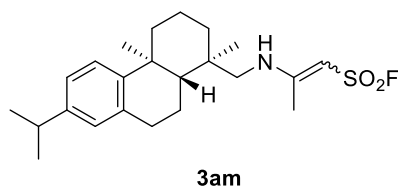

(*Z/E*)-2-((((1*R*,4*aS*,10*aR*)-7-isopropyl-1,4*a*-dimethyl-1,2,3,4,4*a*,9,10,10*a*-octahydrophenanthren-1-yl)methyl)amino)prop-1-ene-1-sulfonyl fluoride (**3am**). White solid, 341 mg, 84% yield. M.p. 116–118 °C. Purification by column chromatography on silica gel using petroleum ether / ethyl acetate = 2:1 (v/v) as eluent. <sup>1</sup>H NMR (500 MHz, CDCl<sub>3</sub>) δ 7.30 (t, *J* = 6.0 Hz, 2.39H), 7.20 – 7.17 (m, 3.37H), 7.04 – 7.00 (m, 3.37H), 6.94 – 6.90 (m, 3.38H), 4.99 (s, 1H), 4.71 (s, 1H), 4.62 (d, *J* = 3.5 Hz, 2.35H), 3.25 – 3.21 (m, 2.32H), 3.02 – 2.81 (m, 14.34H), 3.38 – 2.30 (m, 6.58H), 2.01 – 2.00 (m, 7.0H), 1.85 – 1.70 (m, 13.54H), 1.59 – 1.55 (m, 3.4H), 1.52 – 1.48 (m, 1.01 H), 1.47 – 1.39 (m, 6.90 H), 1.27 – 1.22 (m, 34.10H), 1.03 (s, 2.98H), 1.00 (s, 7.06H). <sup>19</sup>F NMR (471 MHz, CDCl<sub>3</sub>) δ 72.9 (s, 1F), 72.7 (s, 1F). <sup>13</sup>C NMR (126 MHz, CDCl<sub>3</sub>) δ 162.1, 161.4, 146.8, 146.7, 146.2, 145.9, 134.4, 134.3, 127.1, 127.0, 124.4, 124.3, 124.2, 124.2, 82.4 (d, *J* = 25.6 Hz), 77.78 (d, *J* = 23.9 Hz), 55.3, 54.6, 46.7, 45.9, 38.3, 38.3, 38.0, 37.7, 37.6, 37.2, 36.5, 36.3, 33.6, 30.2, 29.9, 25.5, 25.3, 24.1, 24.1, 20.5, 19.4, 19.2, 19.1, 18.6, 18.5, 18.1, 18.0. HRMS-ESI (m/z) calcd. for [C<sub>7</sub>H<sub>13</sub>FNO<sub>2</sub>S]<sup>+</sup> ([M+H]<sup>+</sup>): 408.2367, found: 408.2369.



### 5. Procedure for Scale-up Reaction of *N*-ESF (**3**)

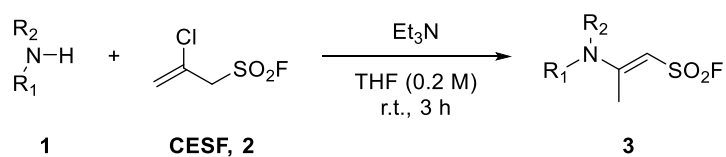

An oven-dried reaction tube (50 mL) equipped with a magnetic stirring bar was charged with amines (**1**, 6.0 mmol, 1.0 equiv.) and CESF (**2**, 1.14 g, 7.2 mmol, 1.2 equiv.), 30.0 mL THF. After stirring evenly, trimethylamine (0.73 g, 7.2 mmol, 1.2 equiv.) was added to the above solution slowly with stirring, and the mixed solution became turbid slowly. The mixture was stirred at room temperature under an air atmosphere for 3 h monitored by TLC. After the reaction was completed, water (50 mL) was added to the mixture and the reaction mixture was extracted with ethyl acetate (3×20 mL). The extracts were dried over anhydrous Na<sub>2</sub>SO<sub>4</sub>, and concentrated under reduced pressure. The residue was purified by column chromatography on silica gel using a mixture of petroleum ether and ethyl acetate as eluents to afford the target product **3**.

## 6. NOESY of (*E*)-2-(methyl(phenyl)amino)prop-1-ene-1-sulfonyl fluoride (**3a**)

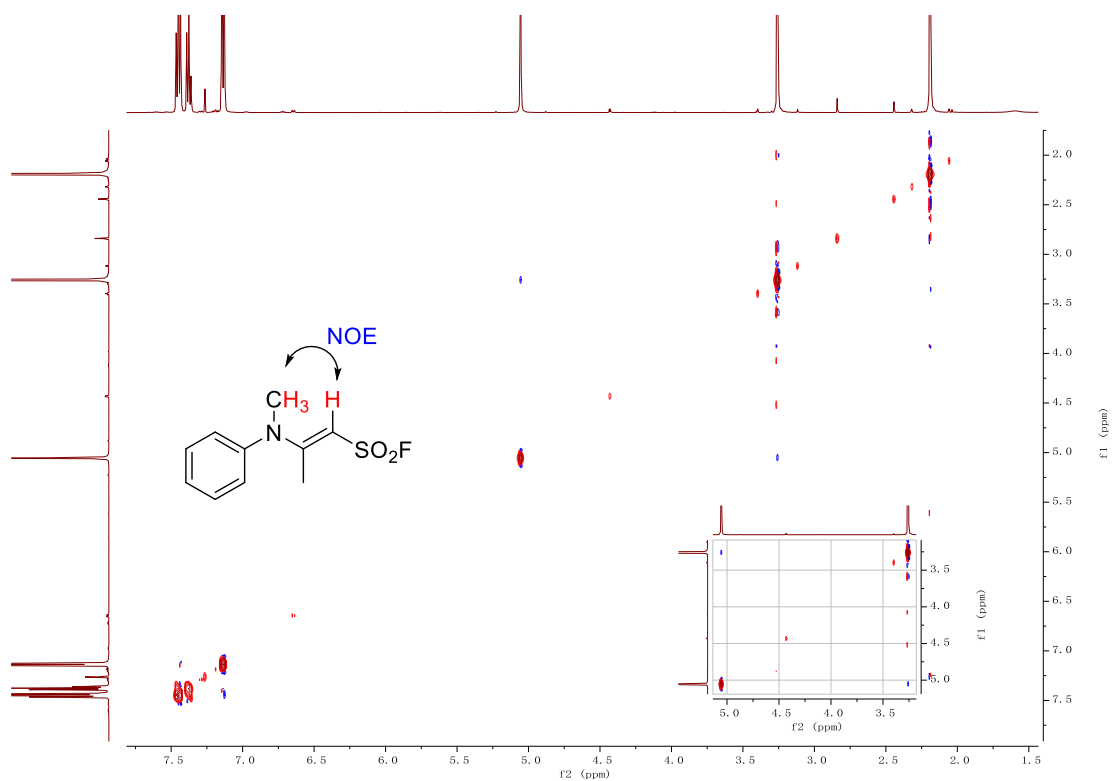

Figure S1 NOESY spectrum of compound **3a** (in CDCl<sub>3</sub>)

## 7. References

- [1] M. J. Brienne, D. Varech, M. Leclercq, J. Jacques, N. Radembino, M. C. Dessalles, G. Mahuzier, C. Gueyouche, C. Bories, P. Loiseau and P. Gayral, New antifilarial agents. 1. Epoxy sulfonamides and ethynesulfonamides, *J. Med. Chem.*, 1987, **30**, 2232-2239.
- [2] Z.-W. Zhang, S.-M. Wang, W.-Y. Fang, R. Lekkala and H.-L. Qin, Protocol for stereoselective construction of highly functionalized dienyl sulfonyl fluoride warheads, *J. Org. Chem.*, 2020, **85**, 13721-13734.
- [3] J. Gong, Q. Wan and Q. Kang, Asymmetric [3+2] Cycloaddition Employing N,N'-Cyclic Azomethine Imines Catalyzed by Chiral-at-Metal Rhodium Complex, *Org. Lett.*, 2018, **20**, 3354-3357.
- [4] H. Zhang, J. Fan, H. Dong, S. Zhang, W. Xu, J. Wang, P. Gao and X. Peng, Fluorene-derived two-photon fluorescent probes for specific and simultaneous bioimaging of endoplasmic reticulum and lysosomes: group-effect and localization, *J. Mater. Chem. B.*, 2013, **1**, 5450-5455.
- [5] S. Natori, Antibacterial Effect of Lichen Substances and Related Compounds. VII. The Structure-Activity Relationship observed in Compounds related to Dibenzofuran and an Approach to the Elucidation of the Mode of Action, *Pharm. Bull.*, 1957, **5**, 539-560.

## 8. NMR Spectra

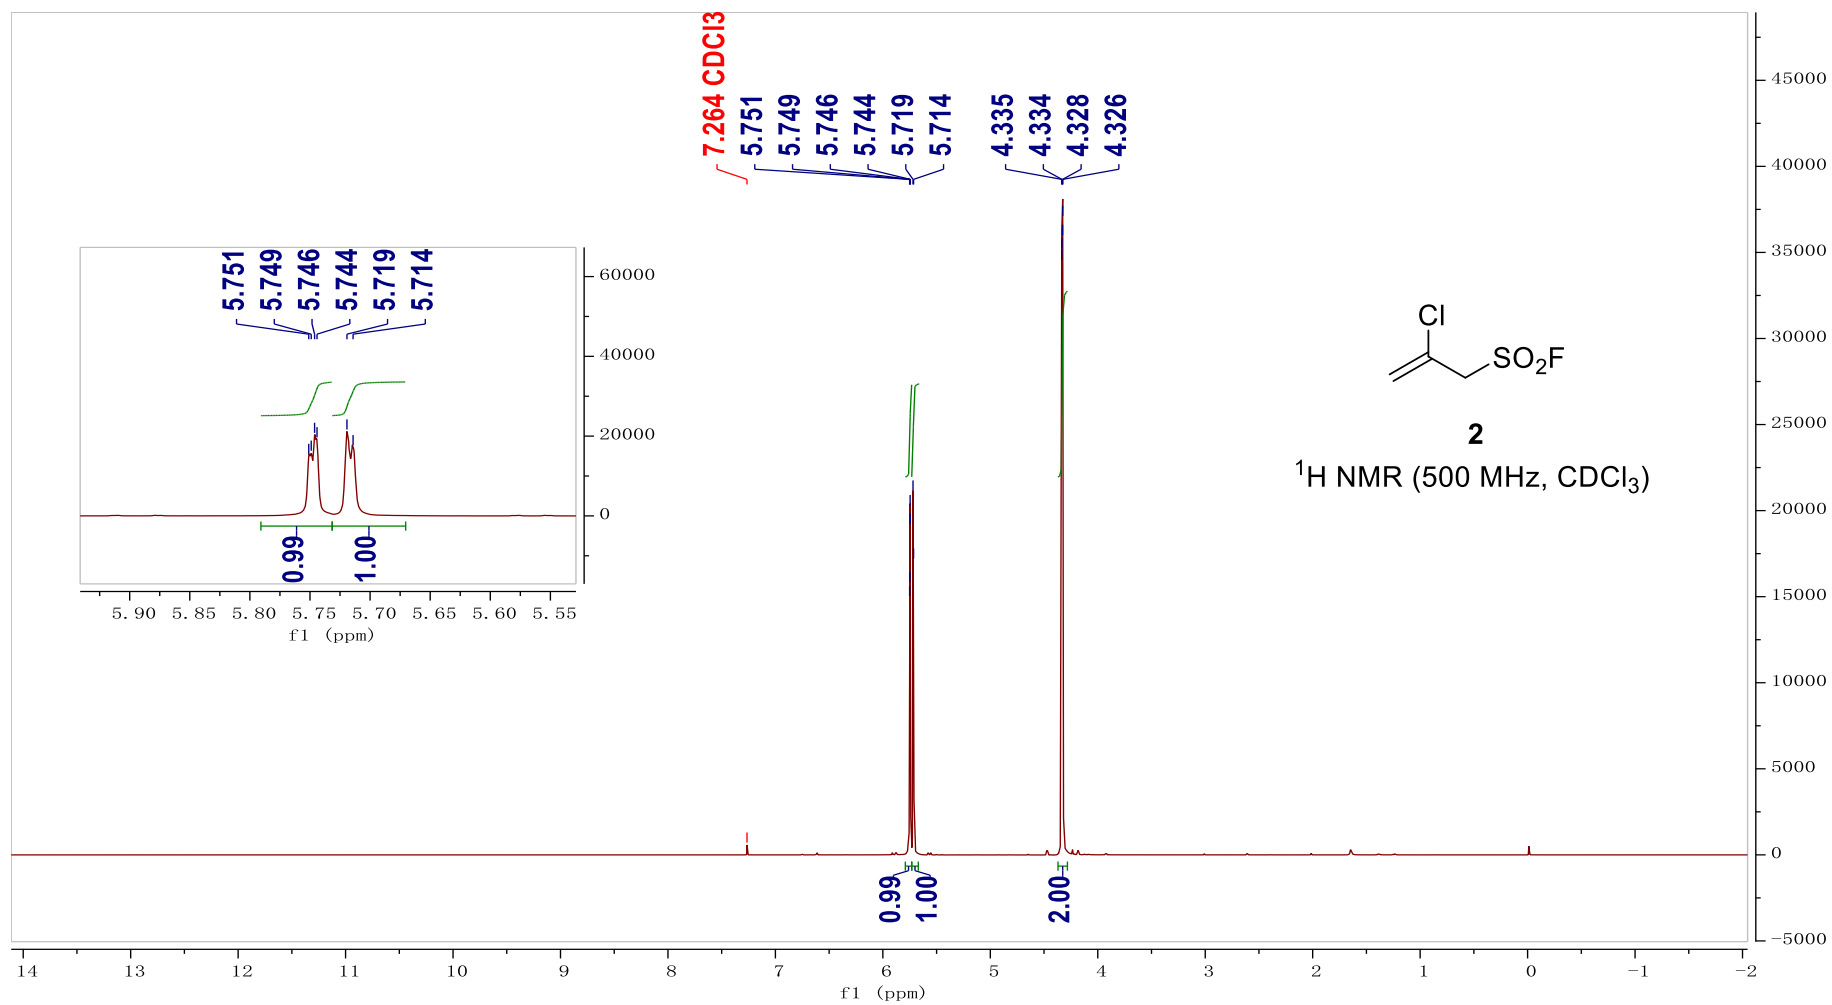

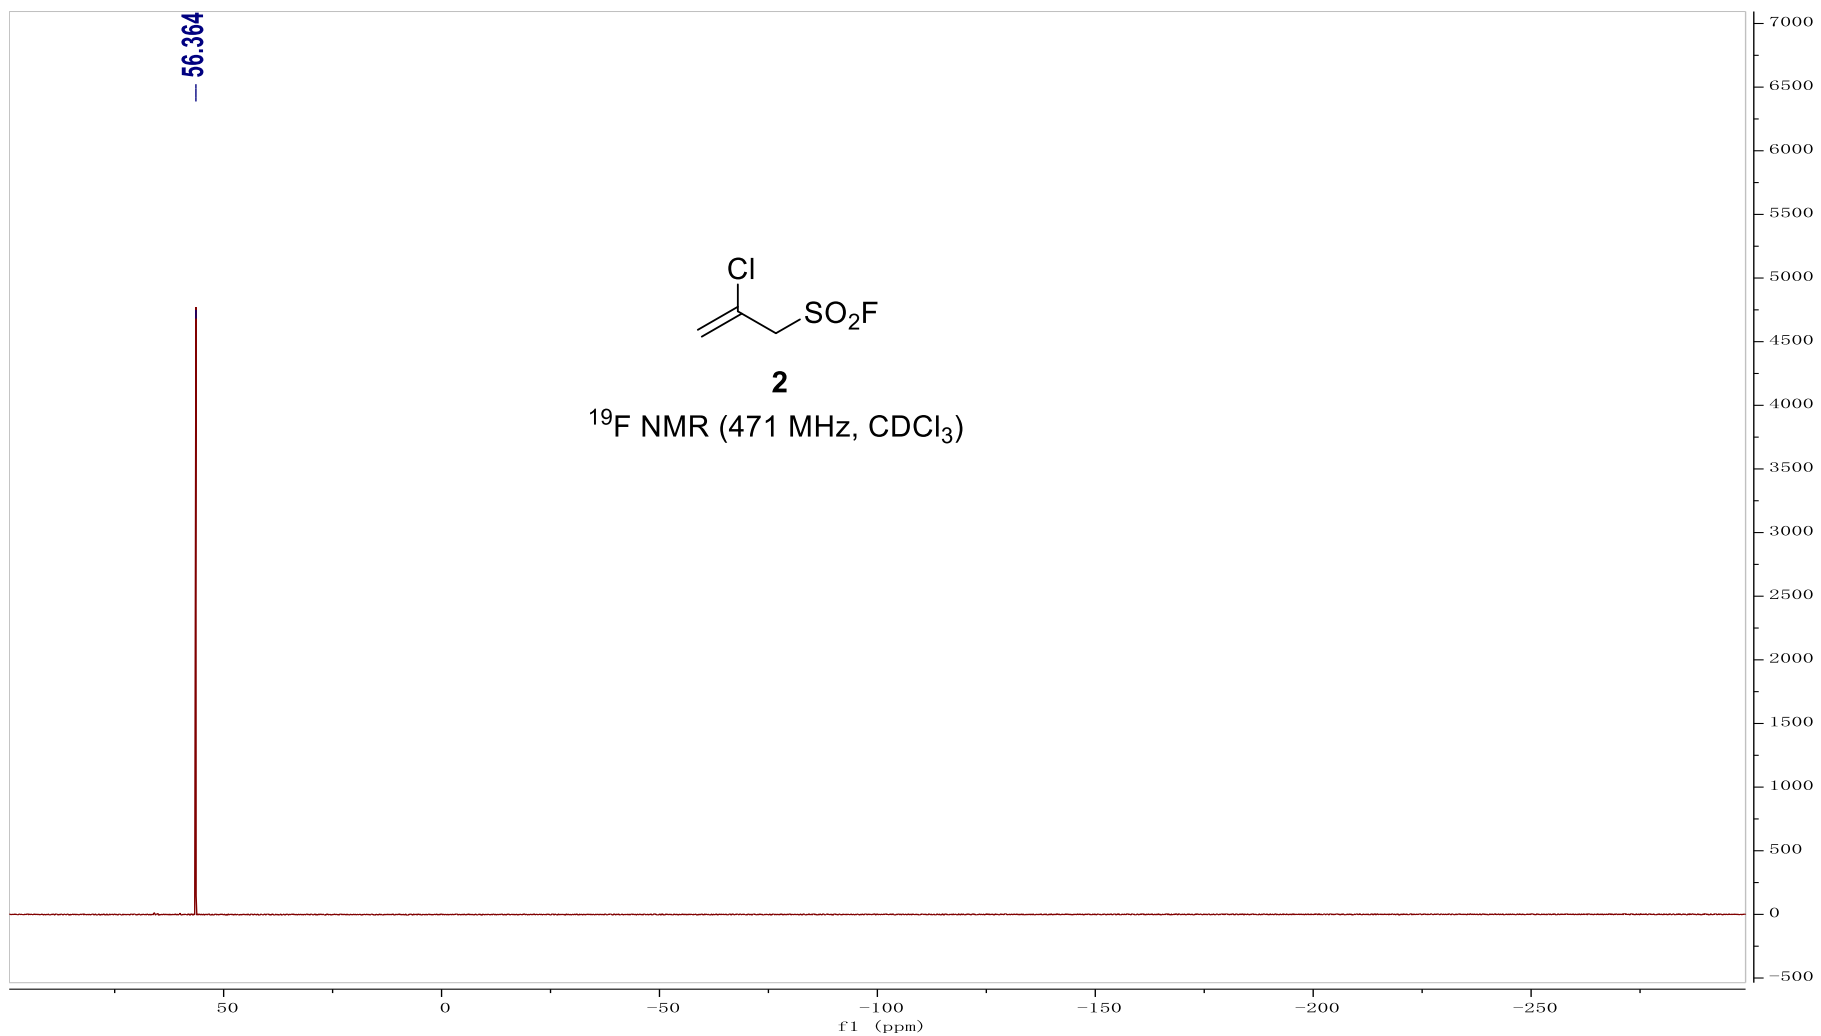

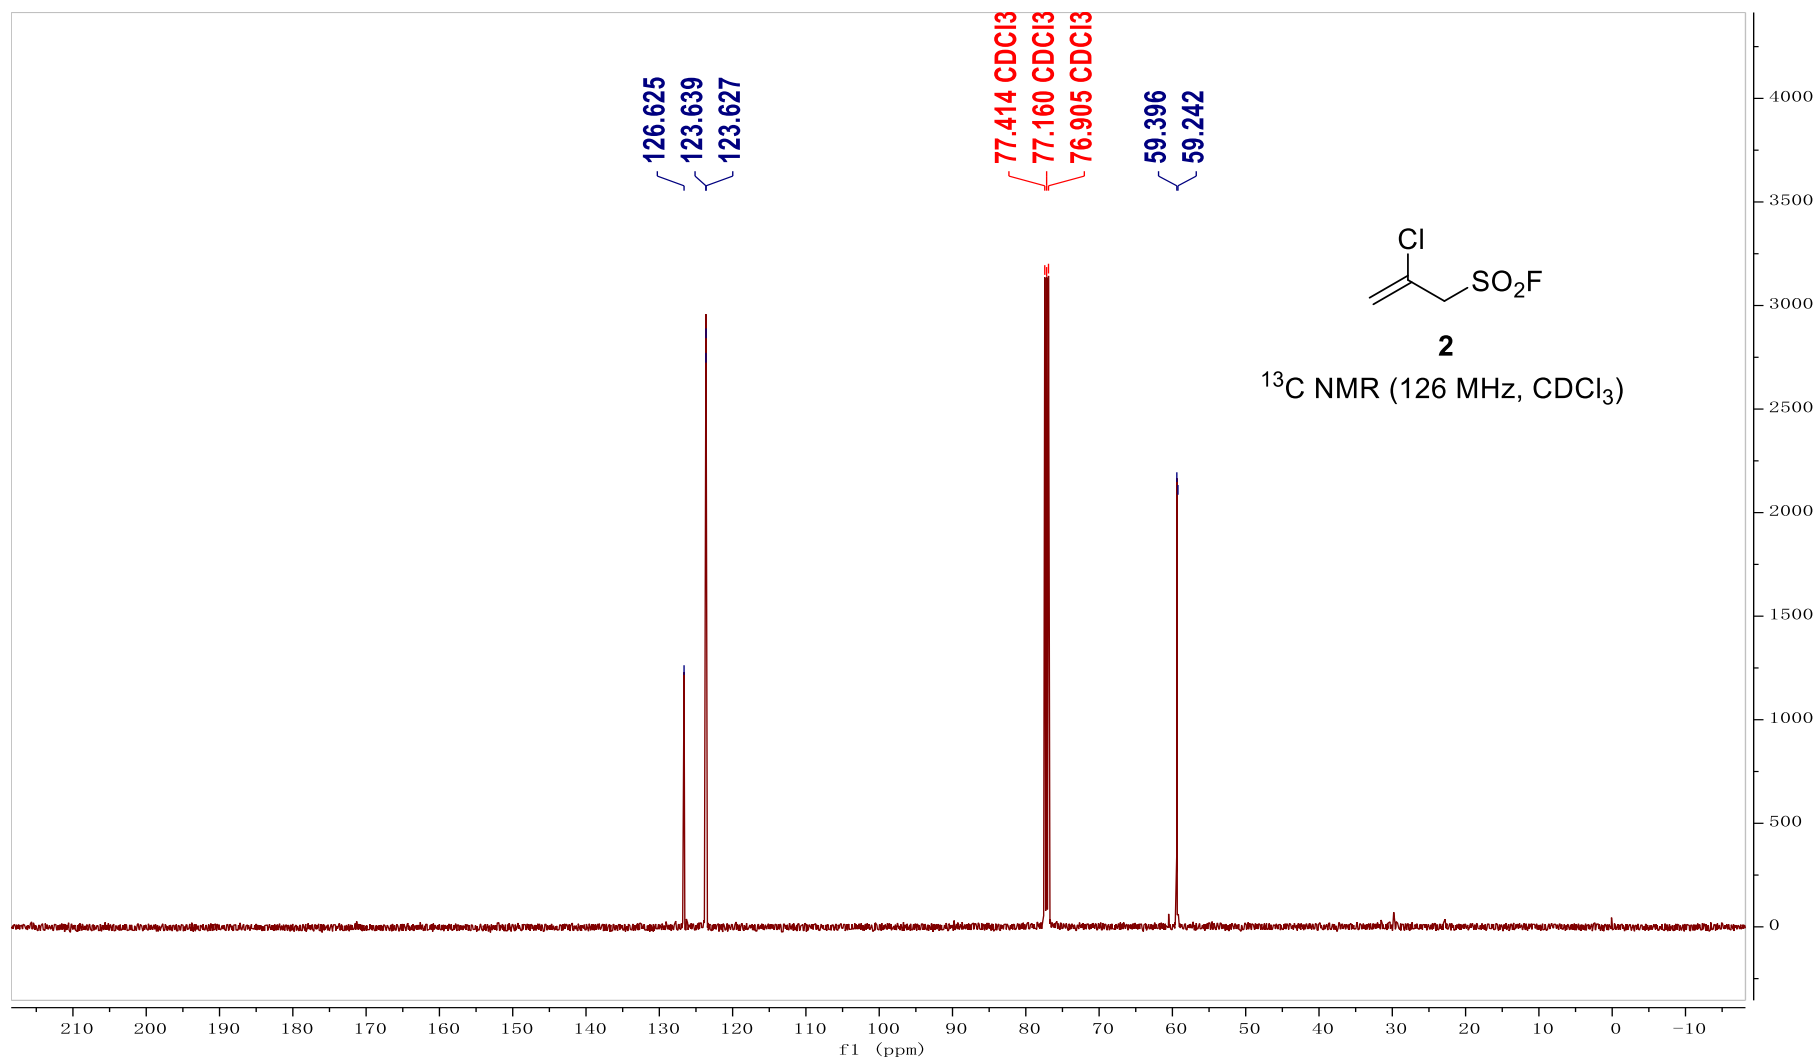

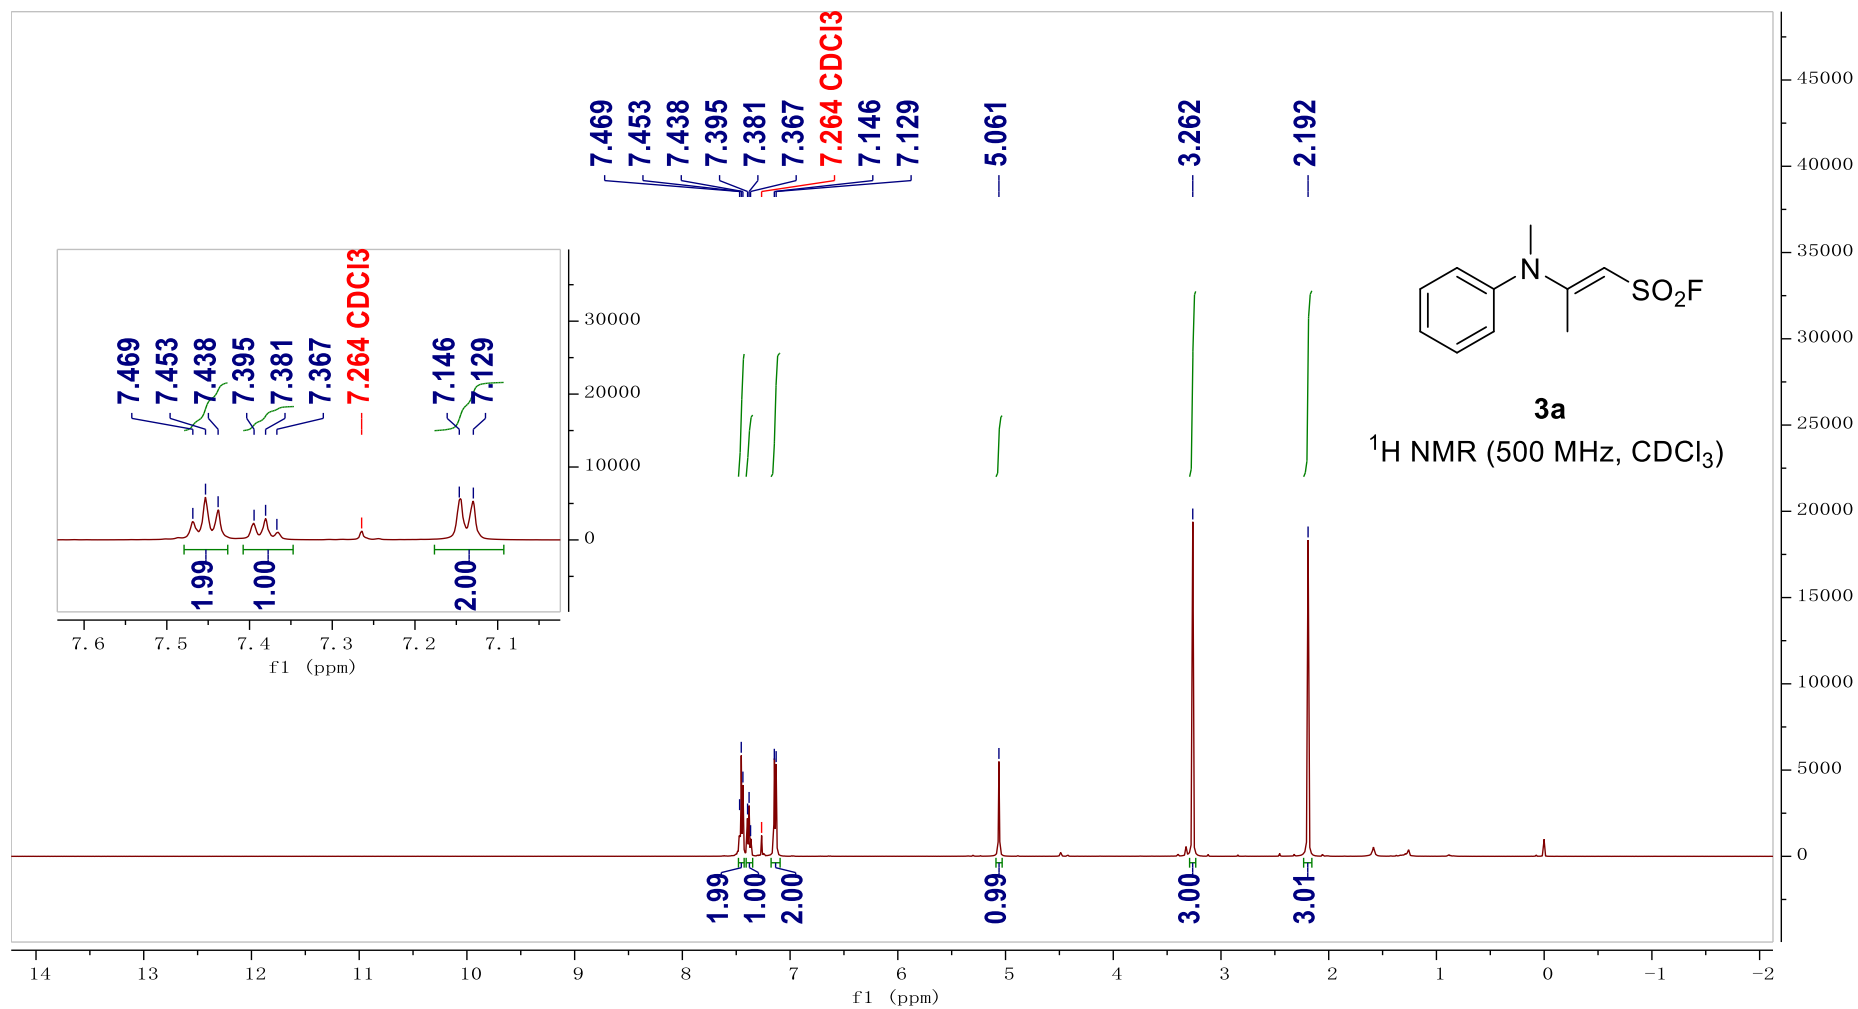

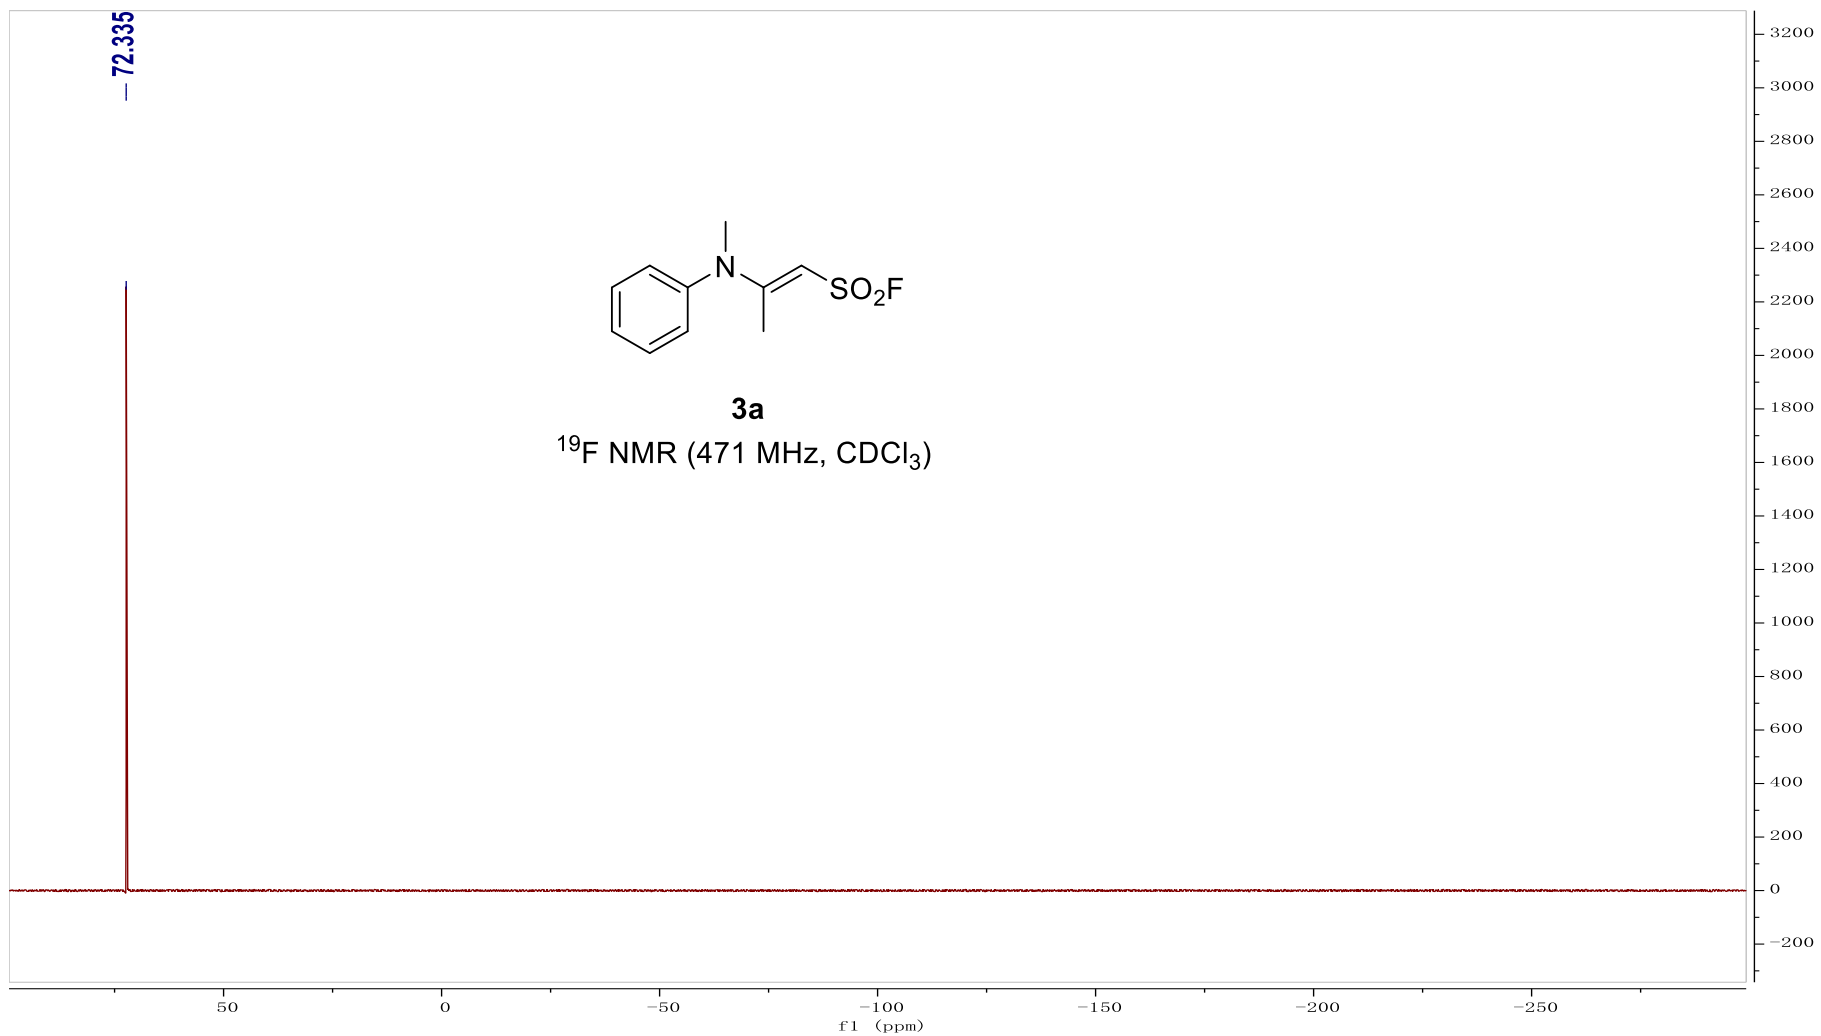



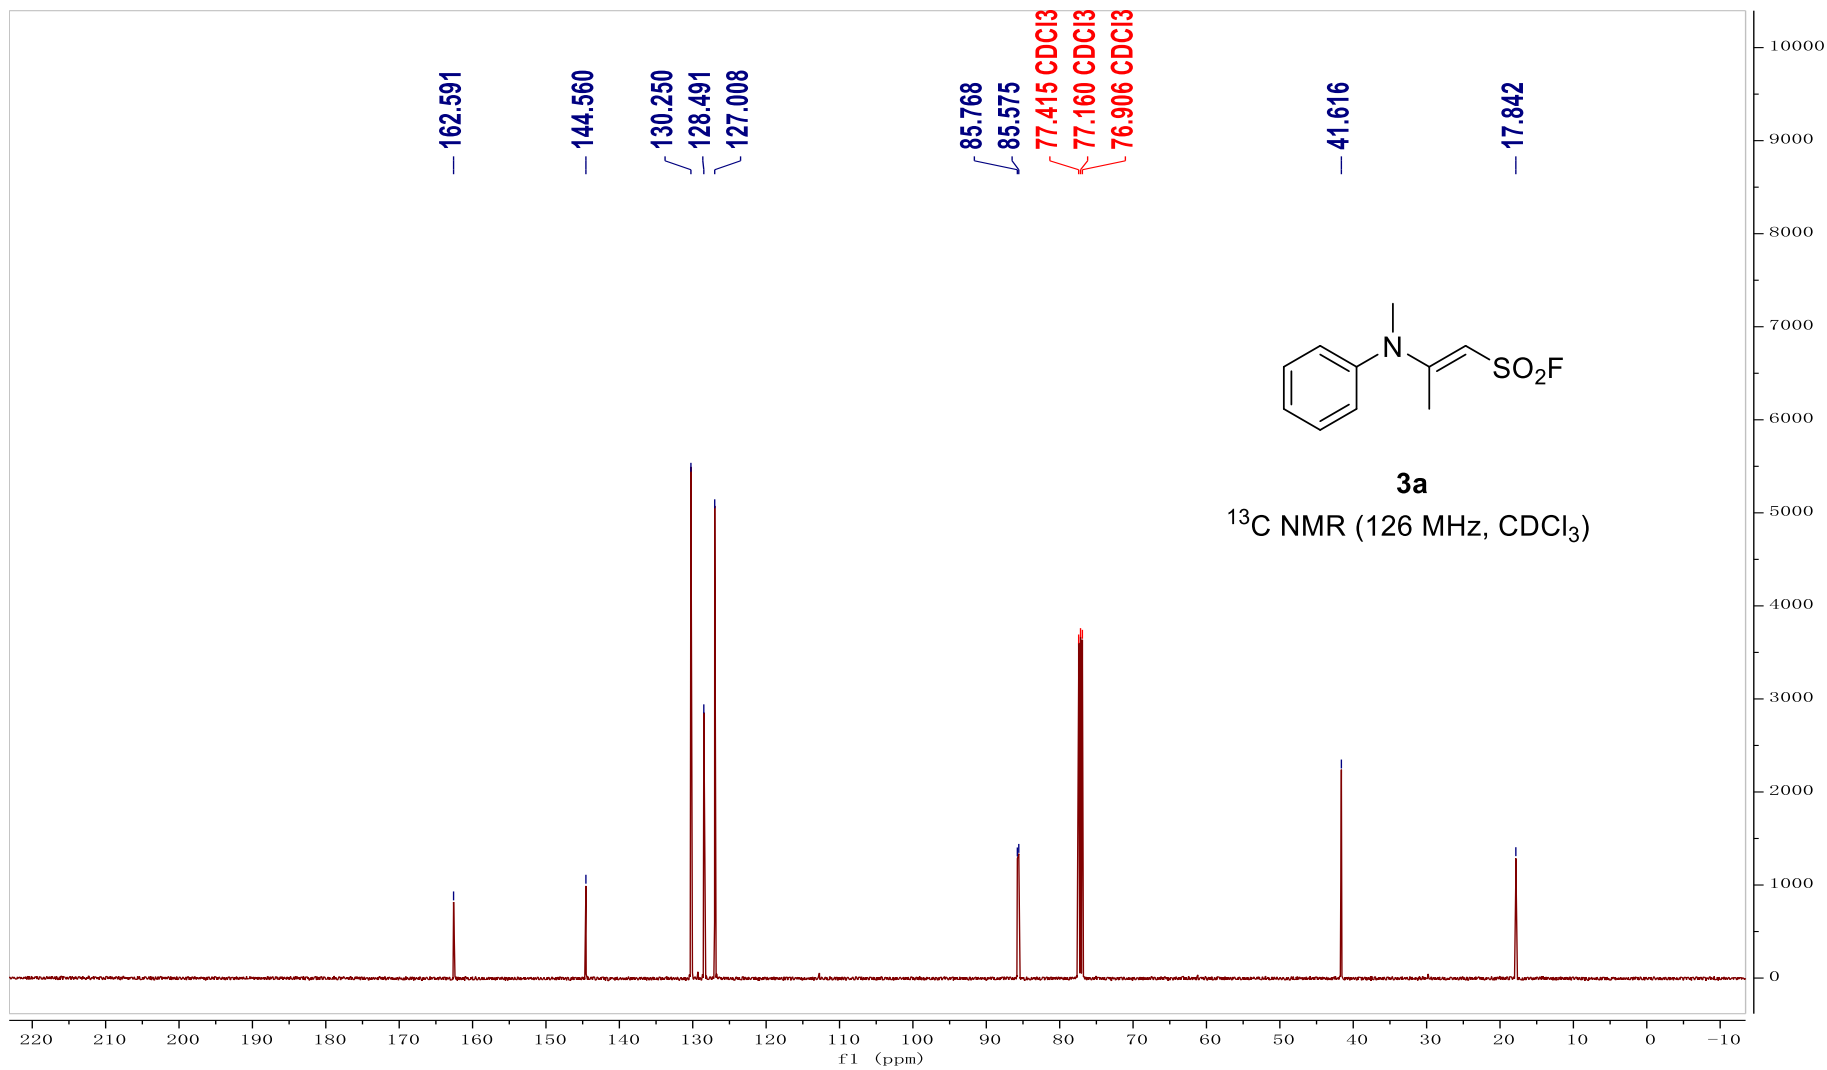

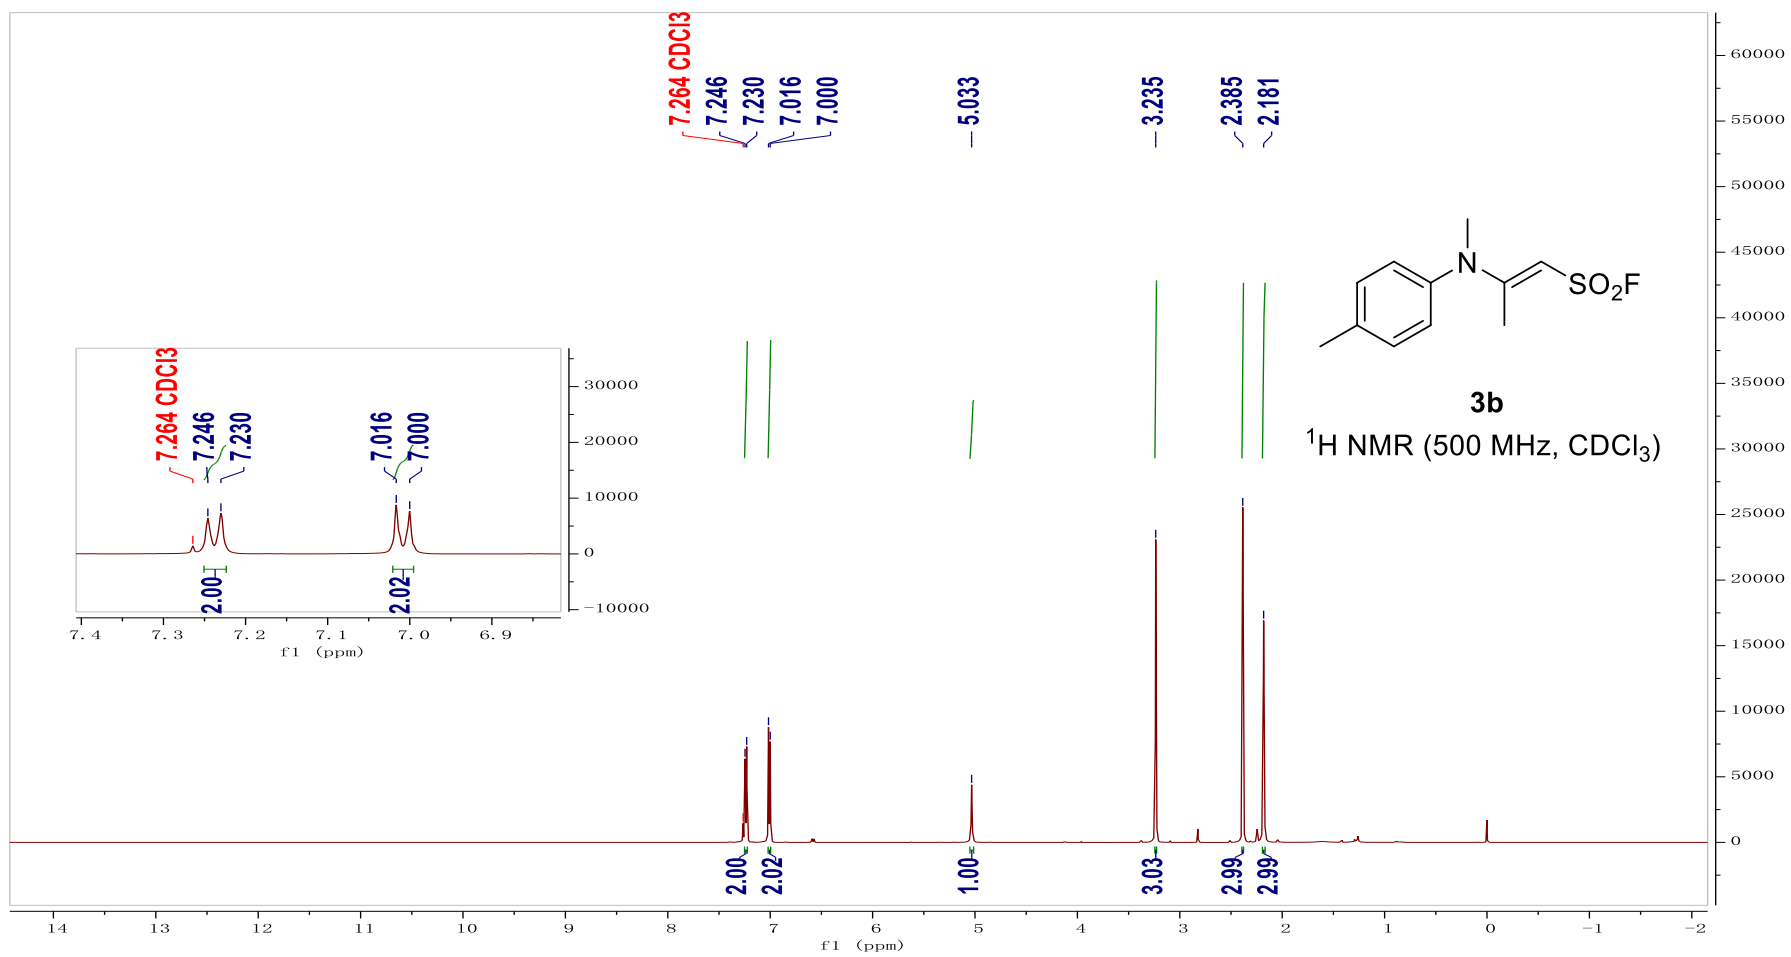

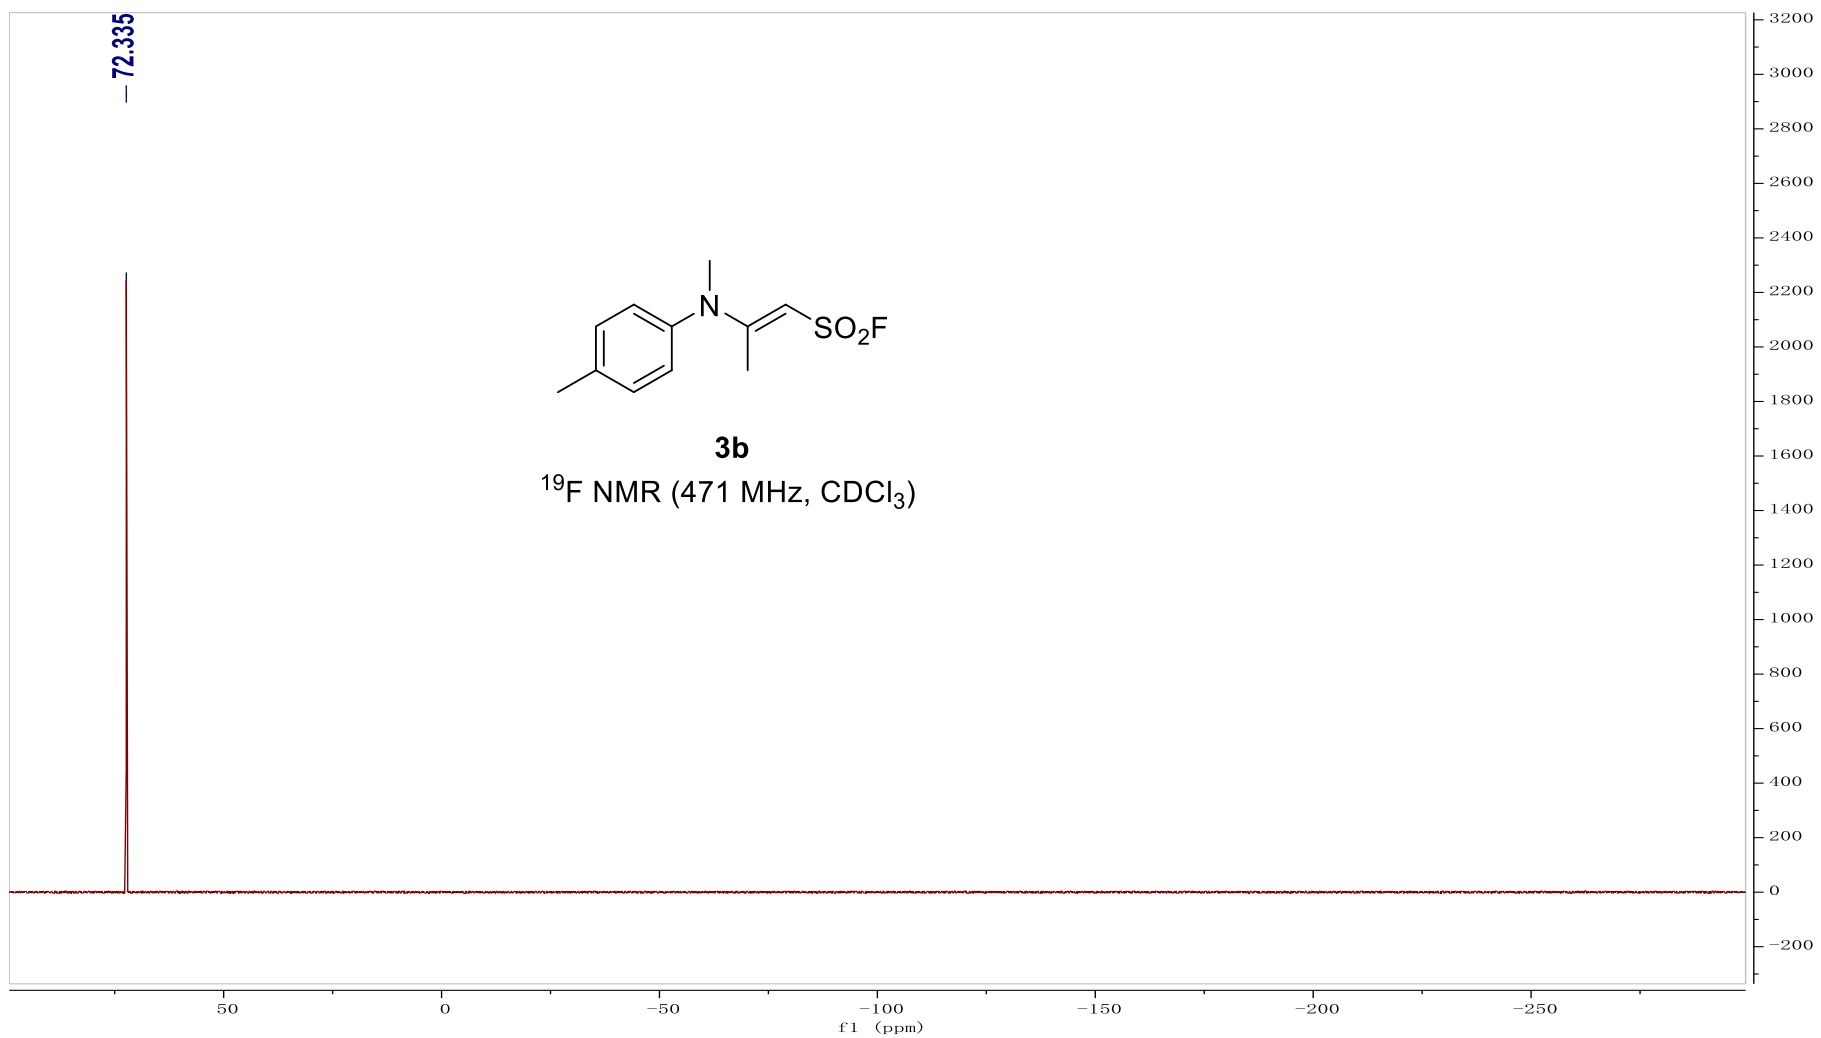

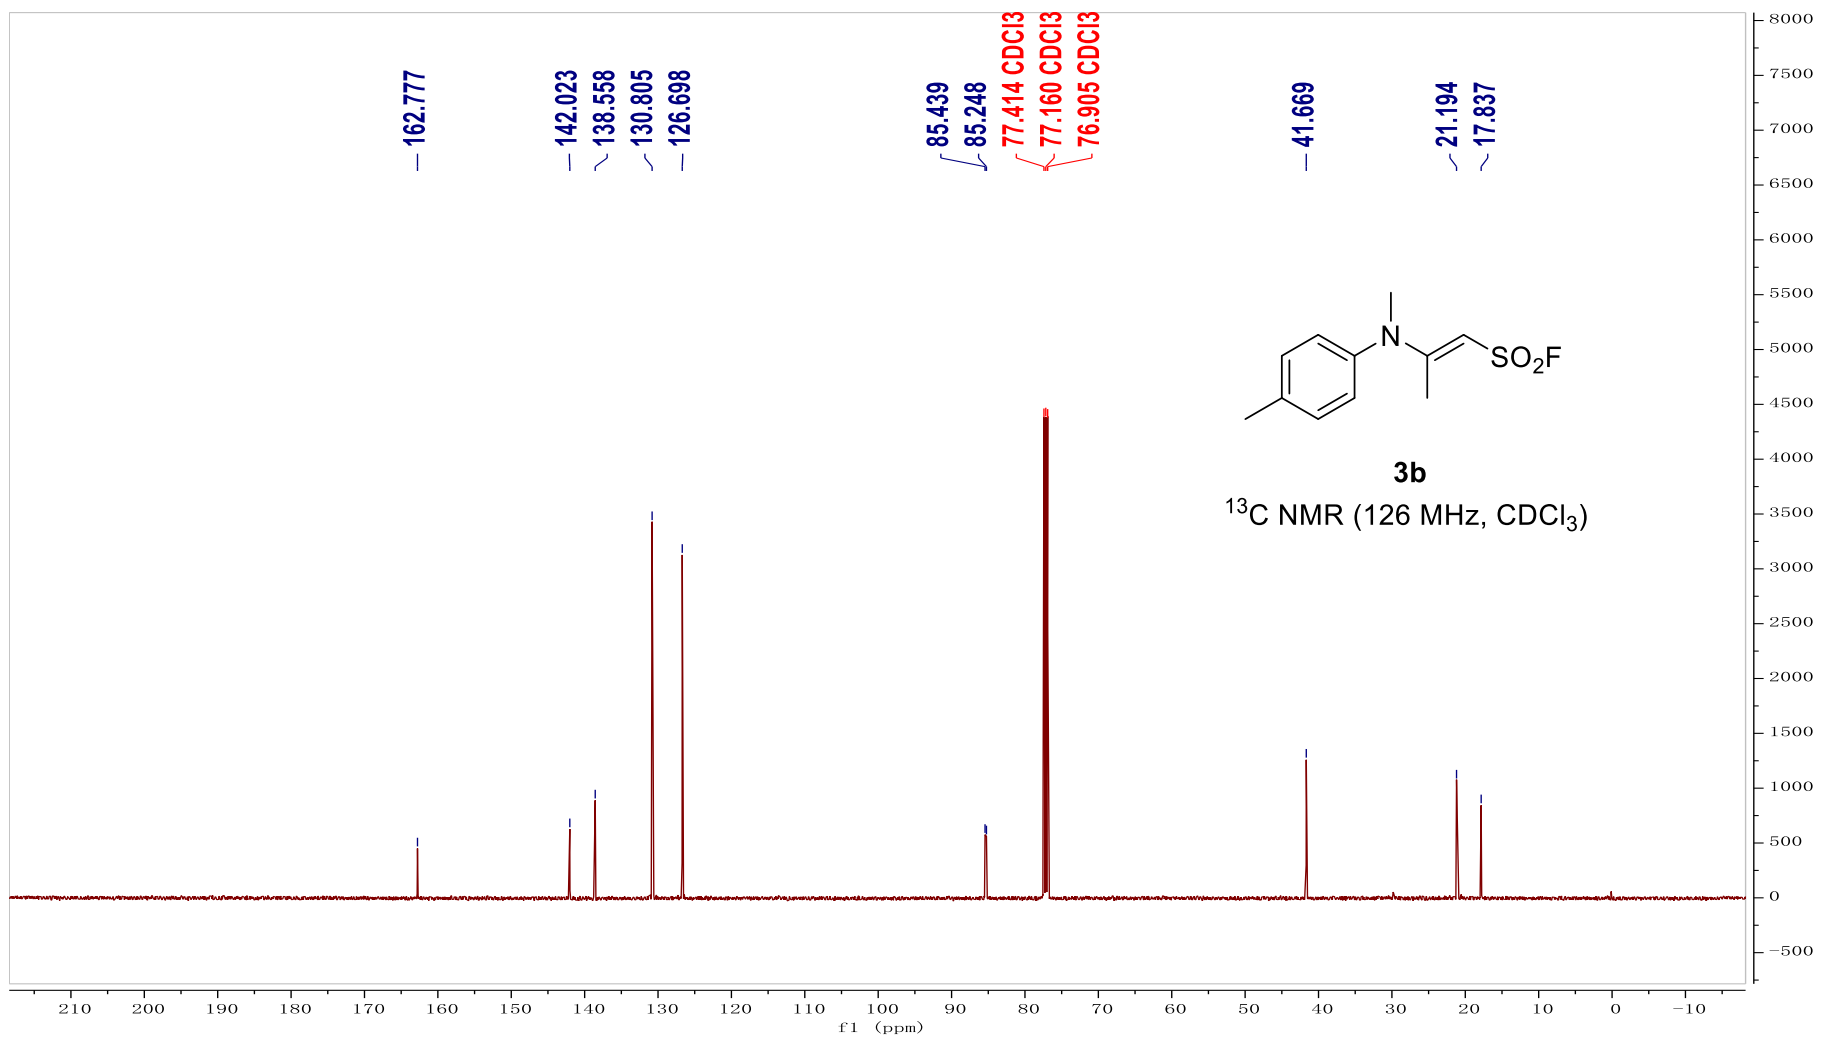

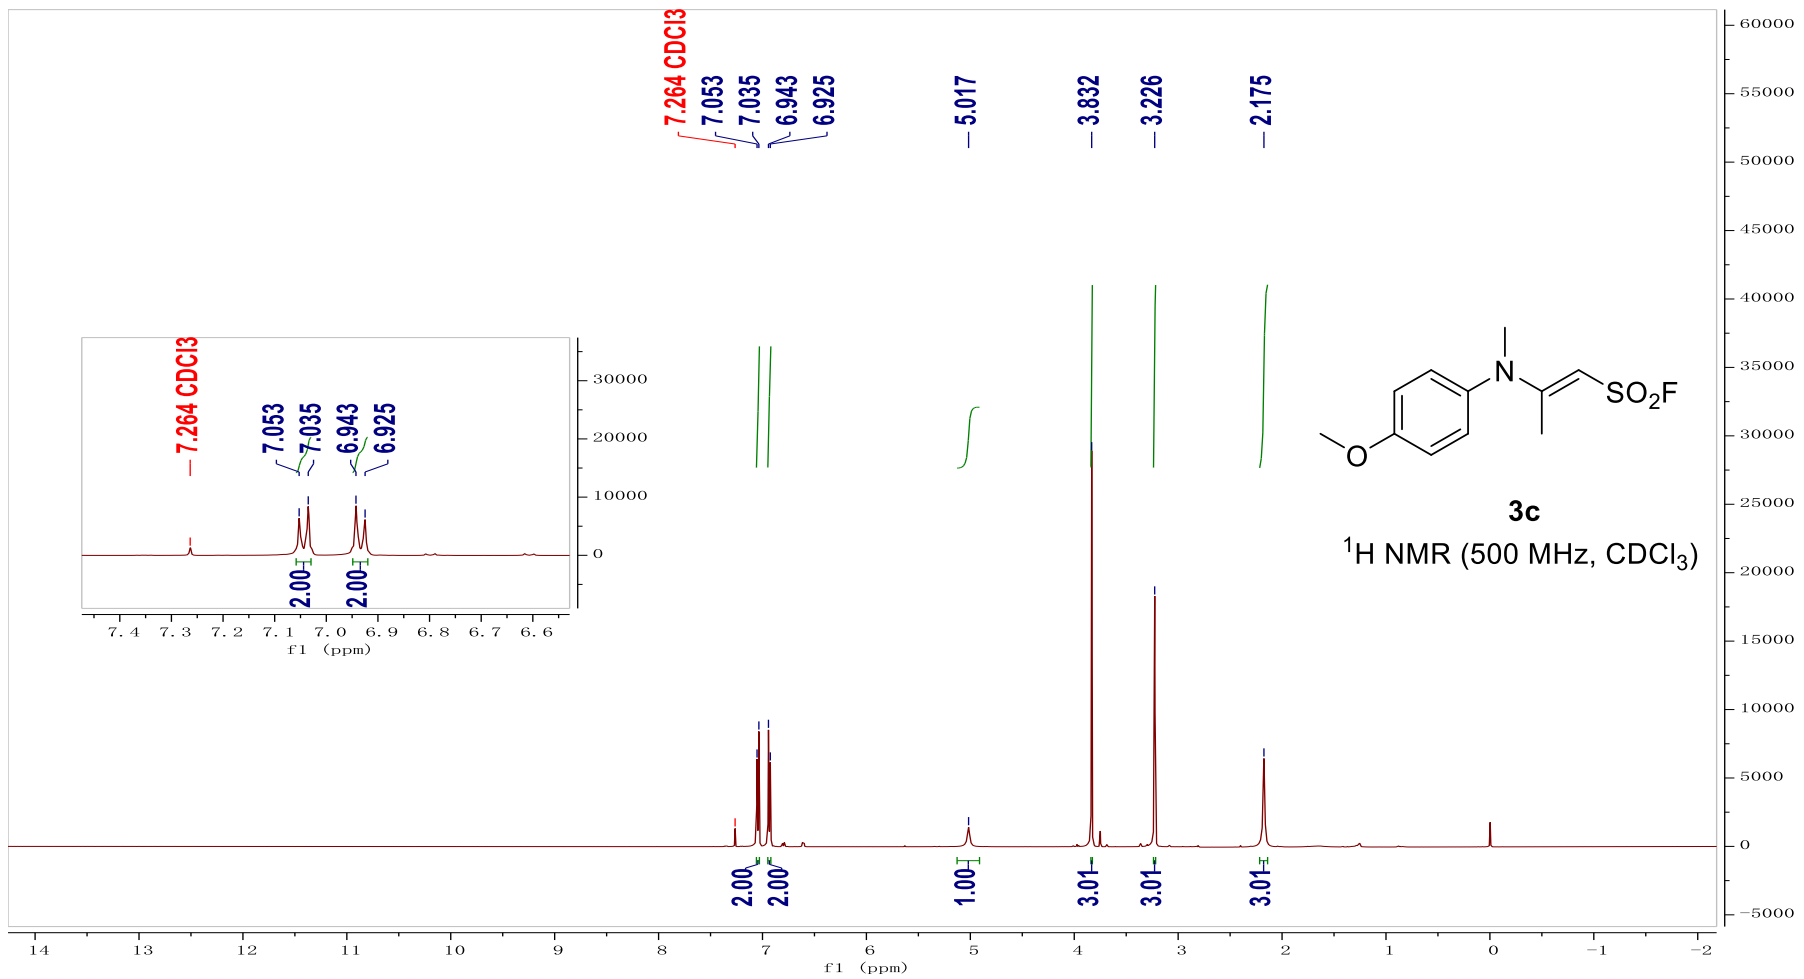

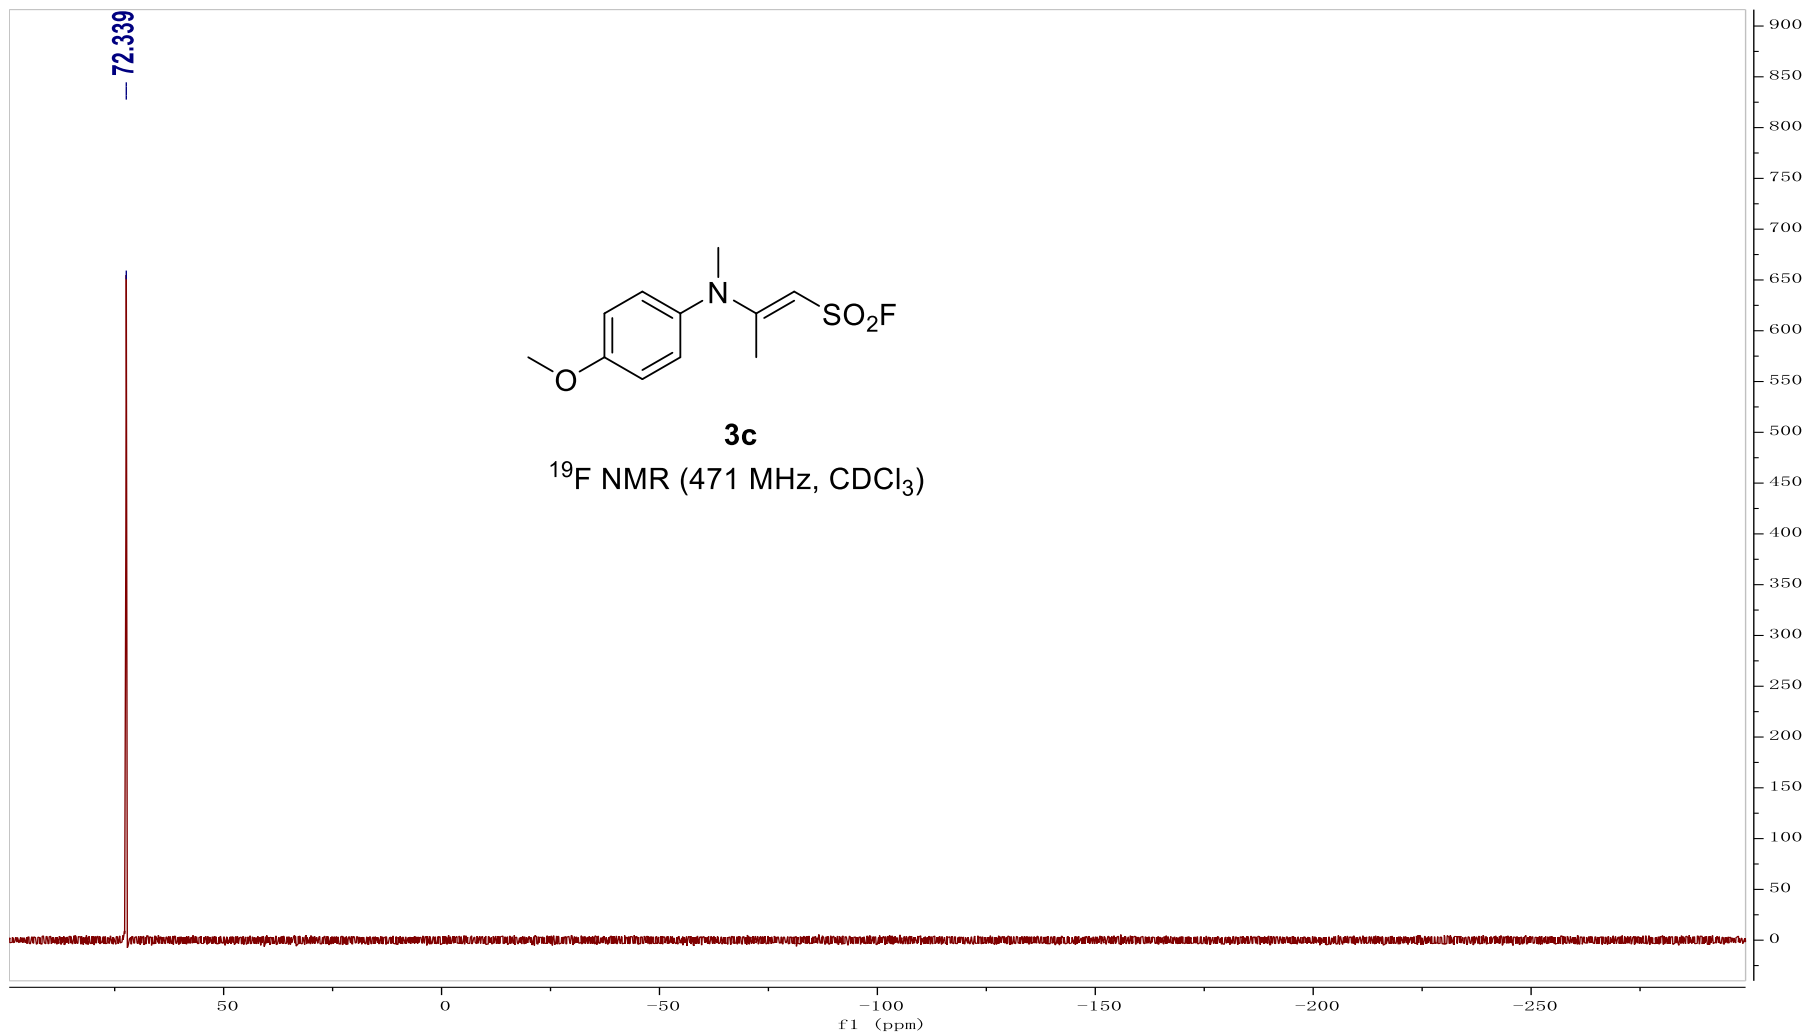

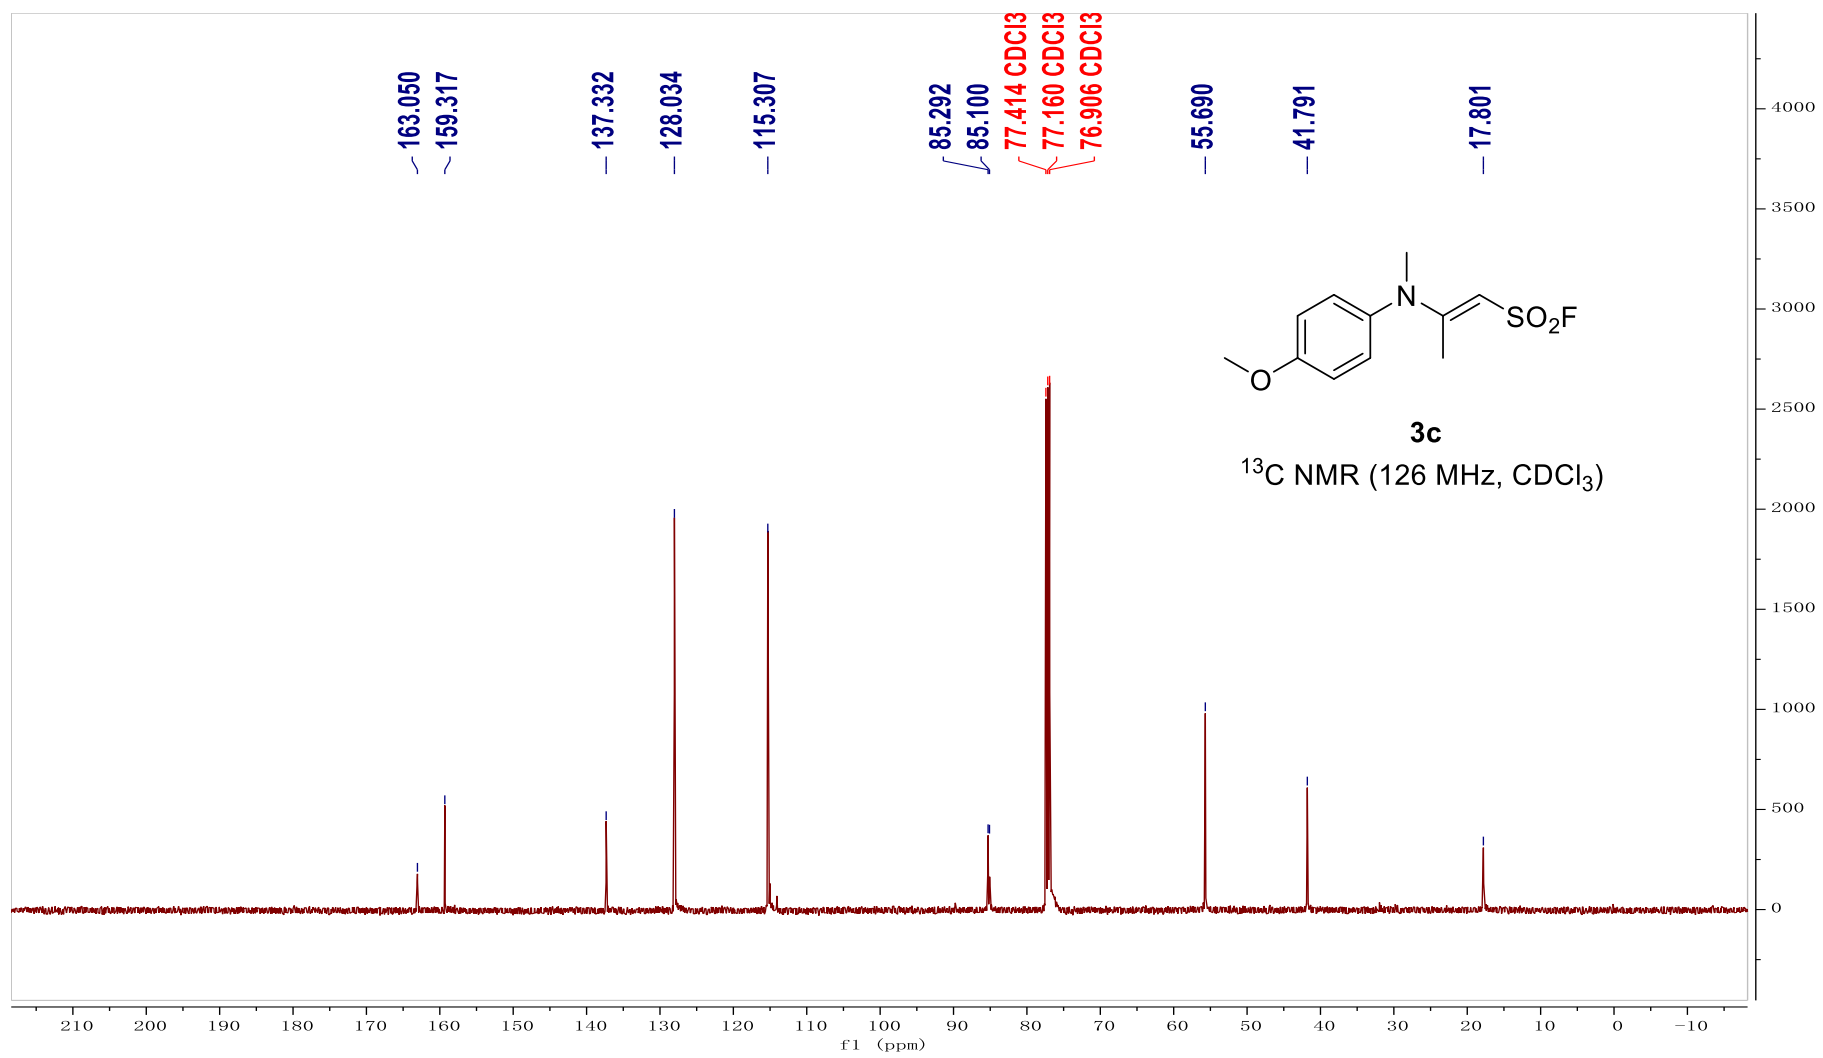

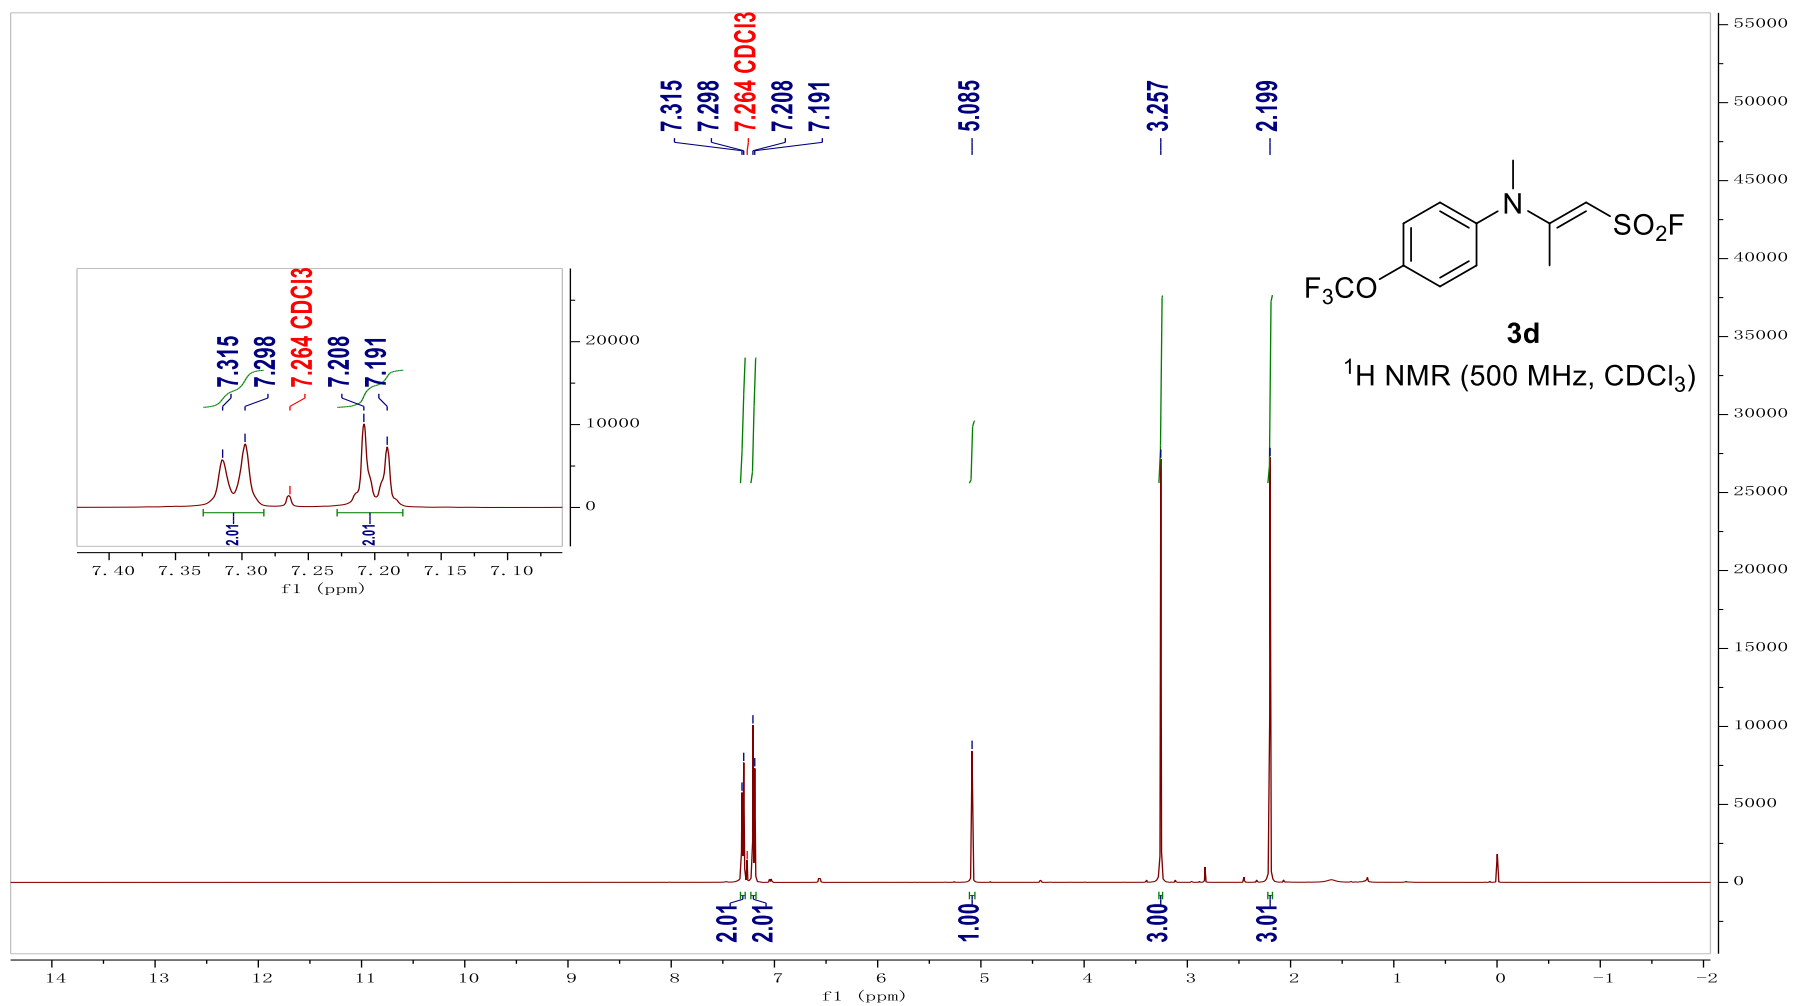



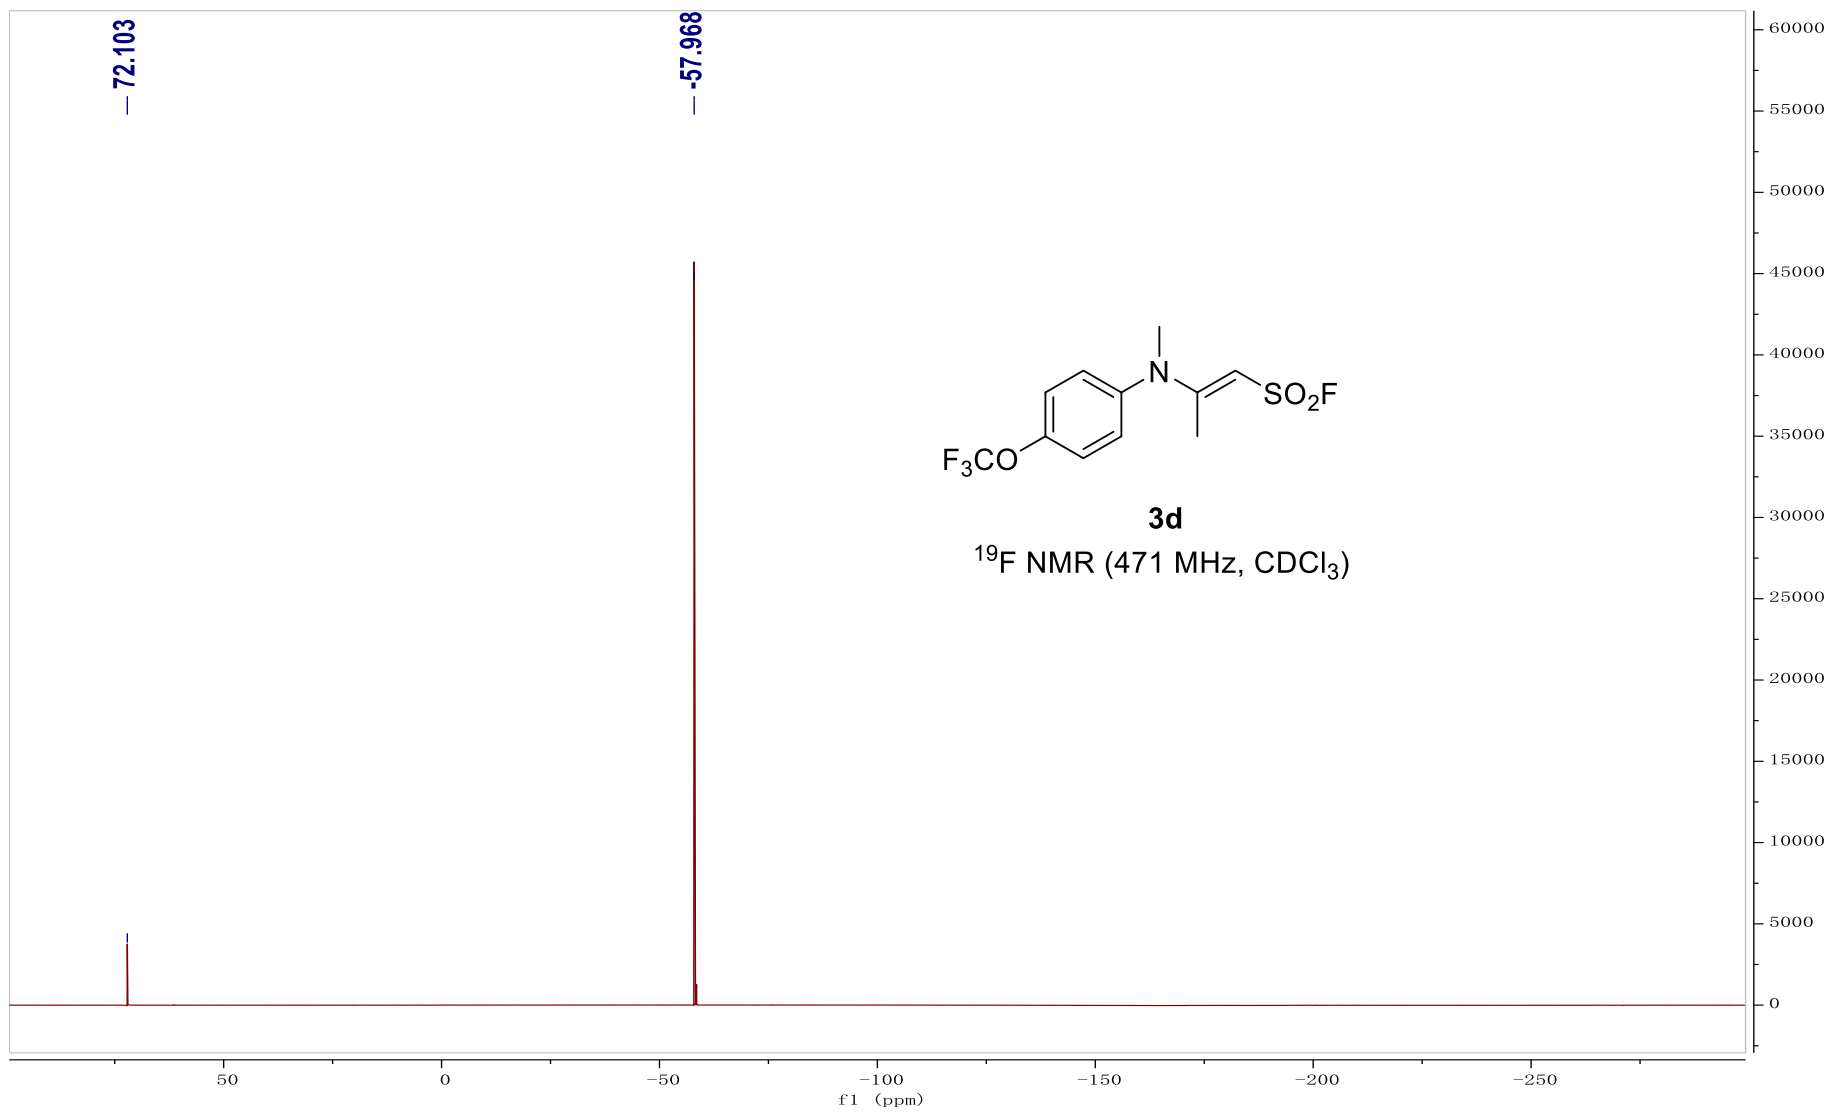

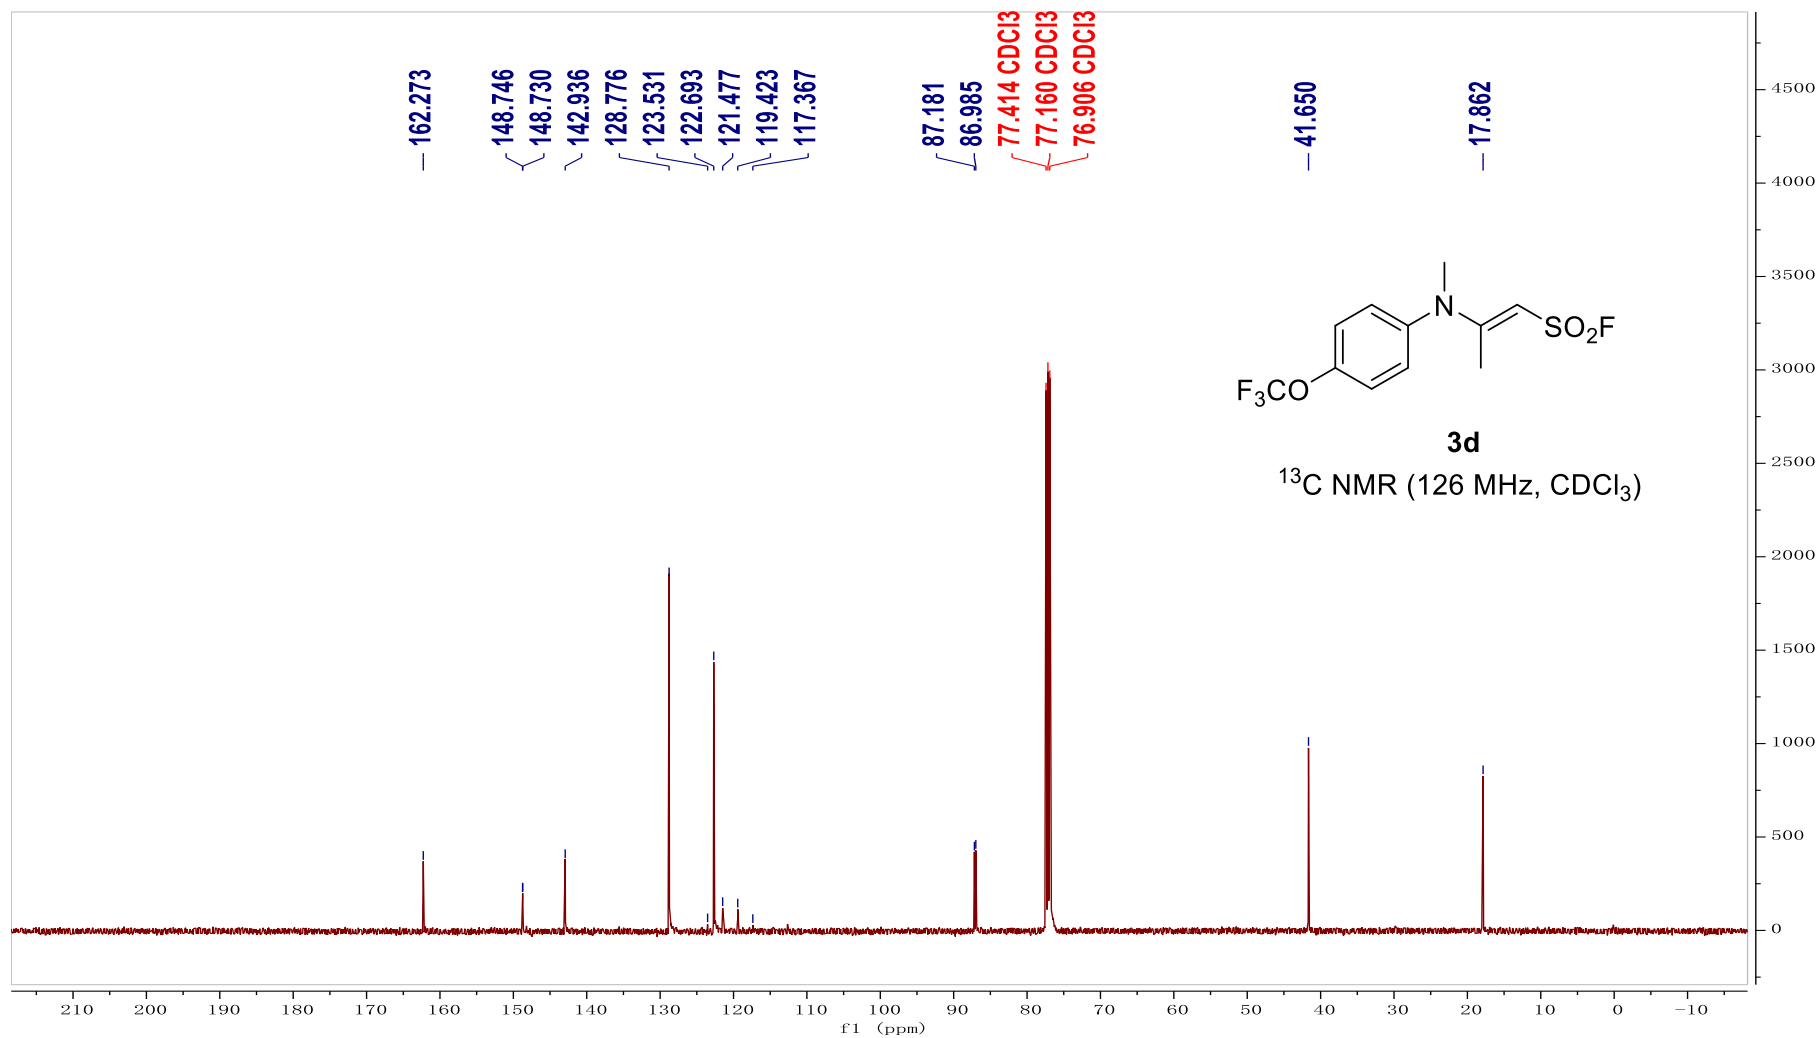

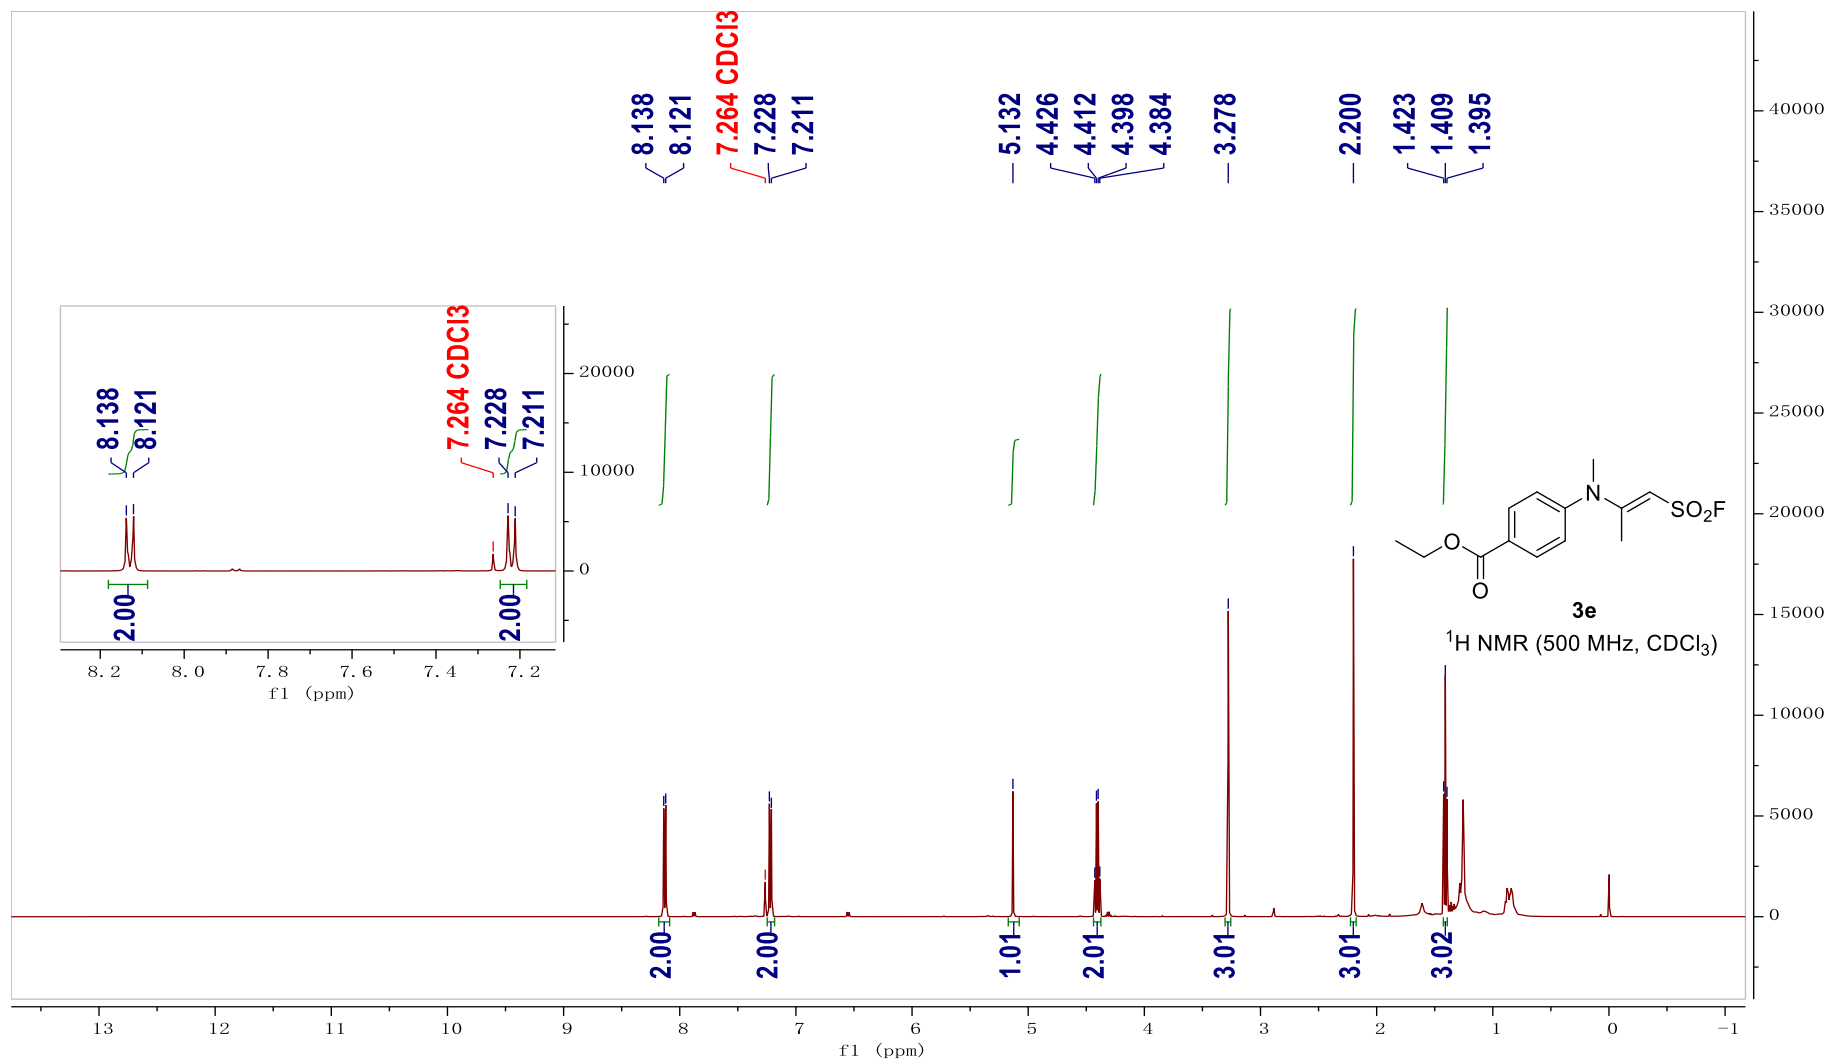

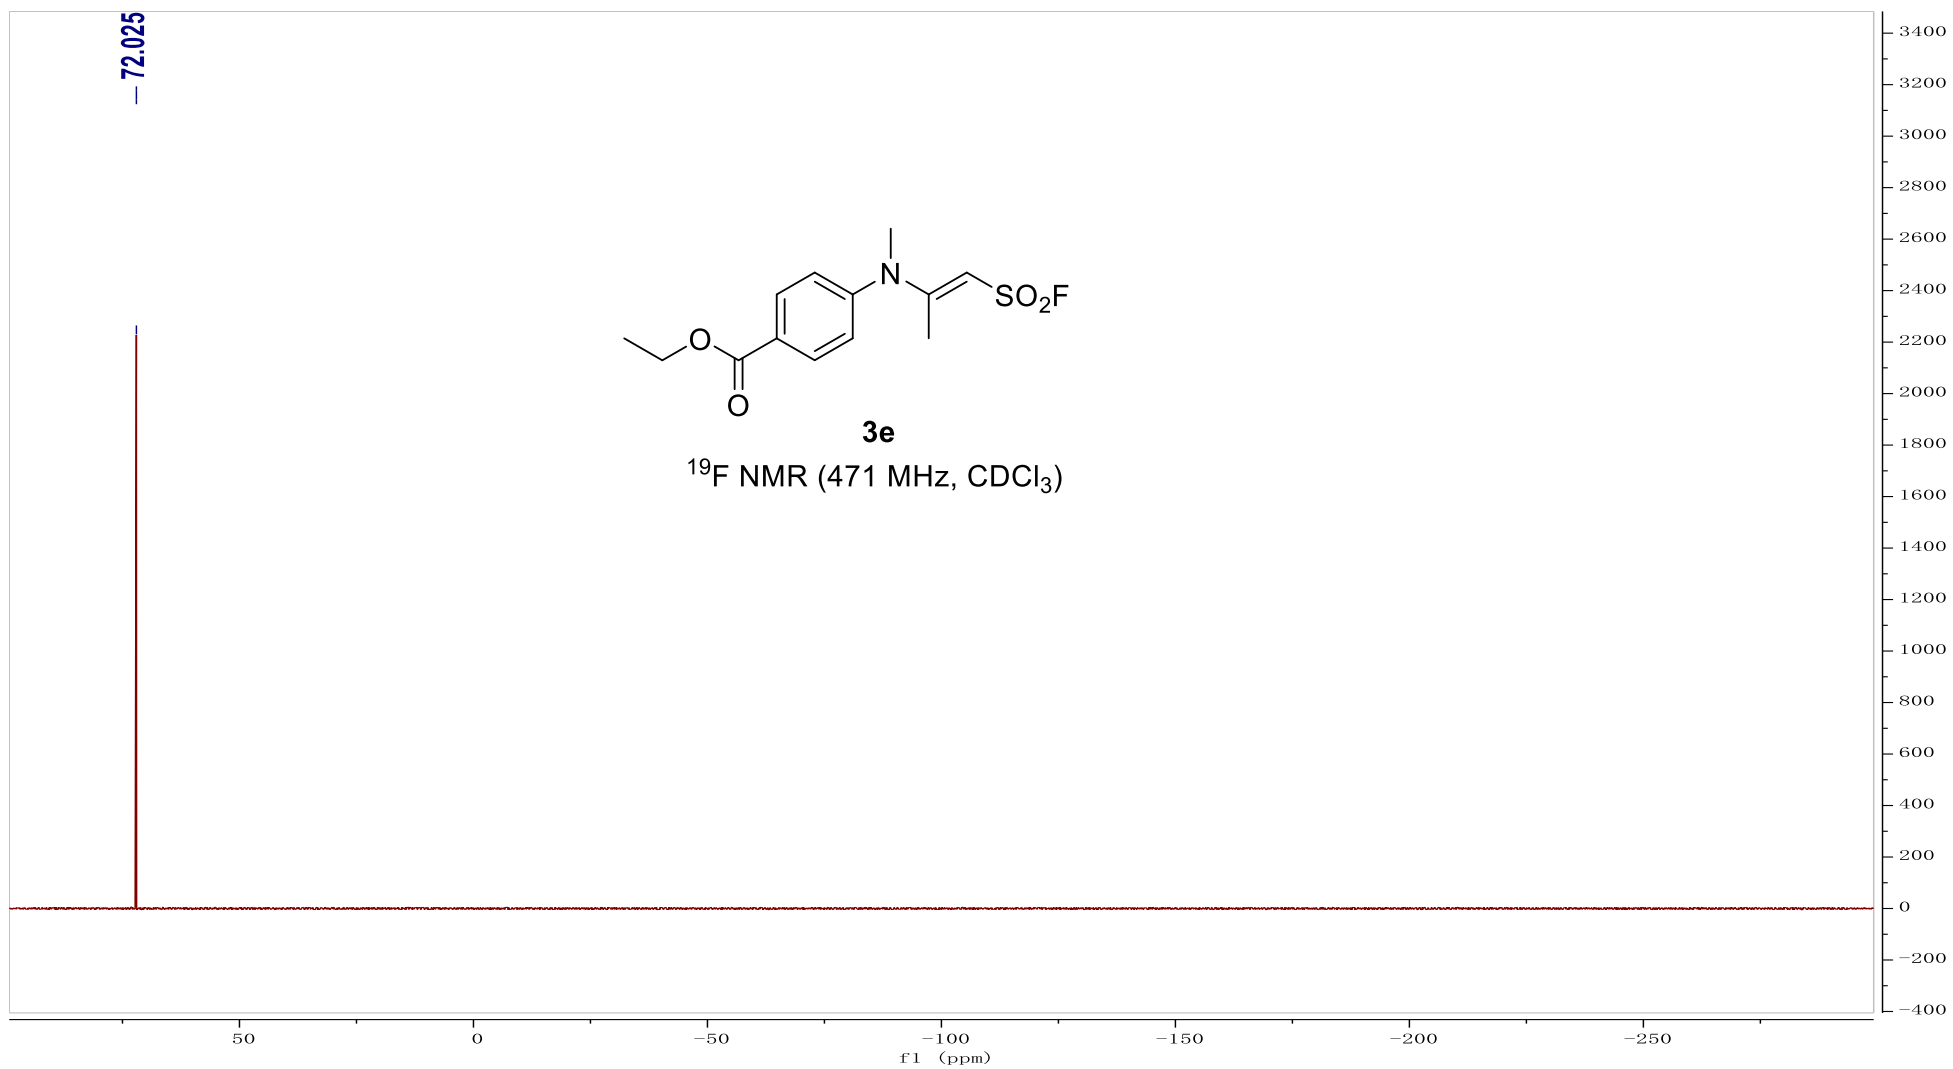

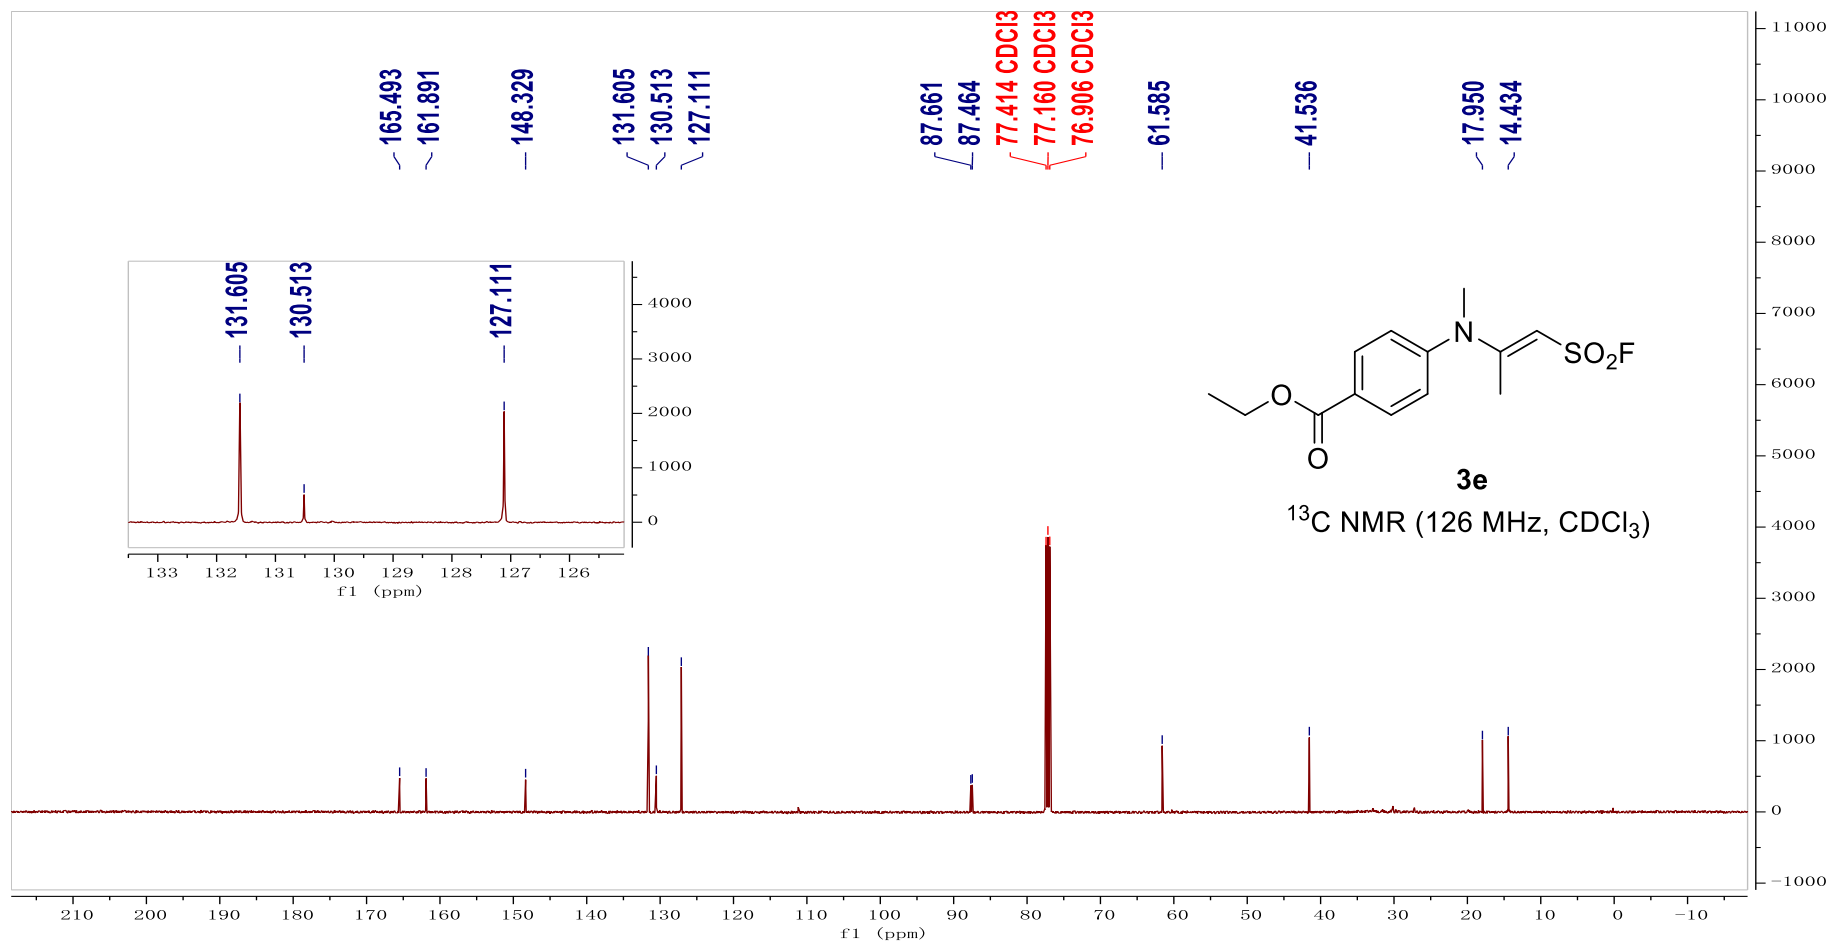

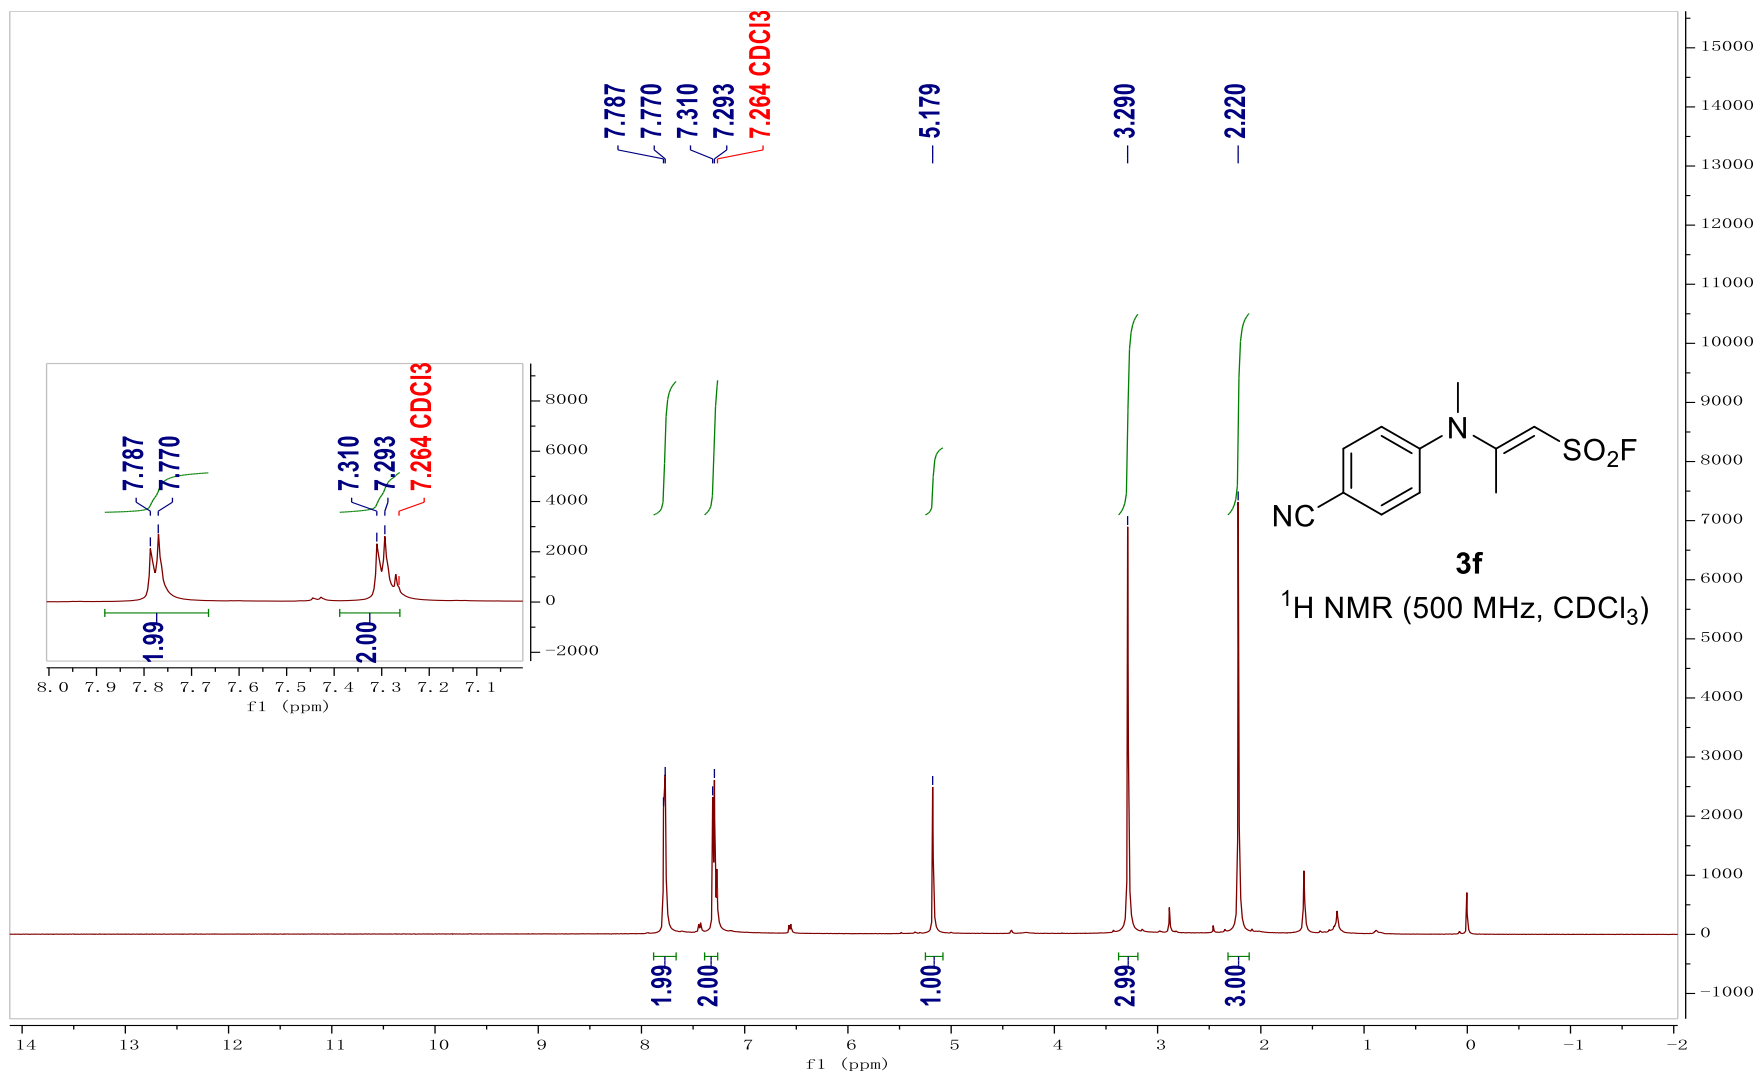

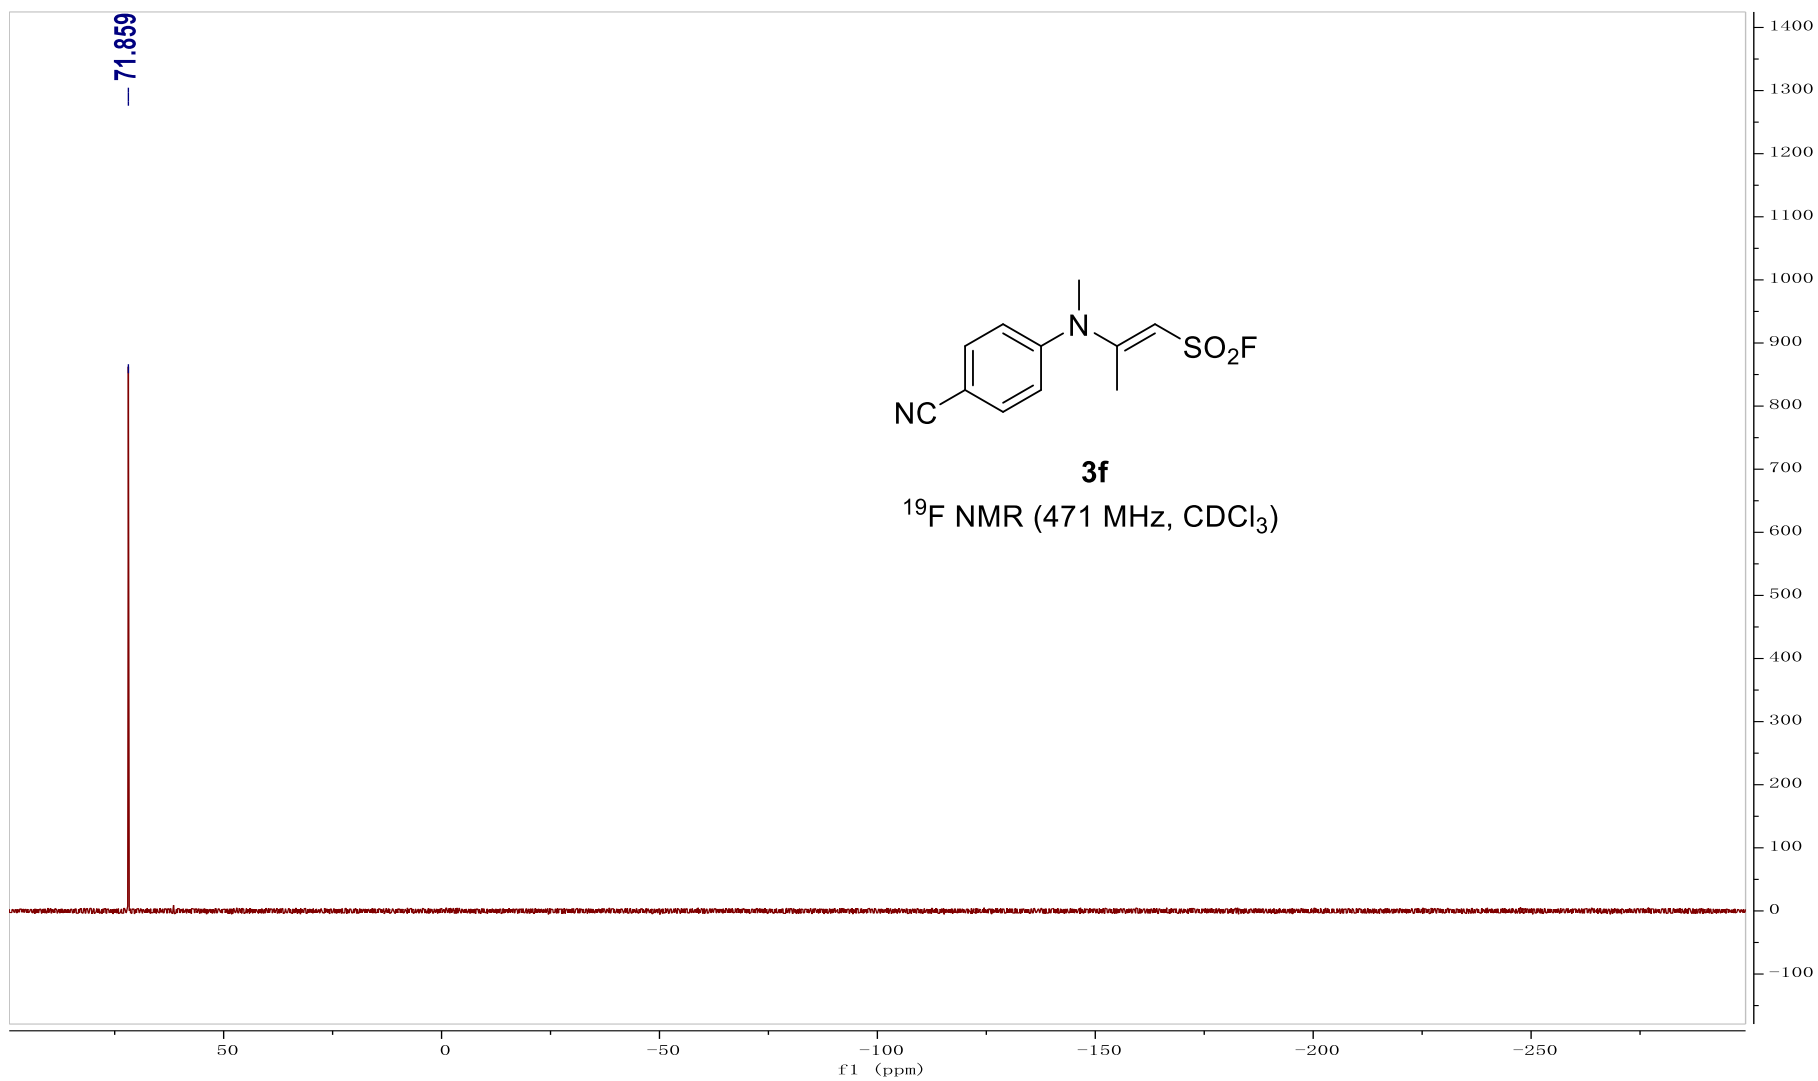

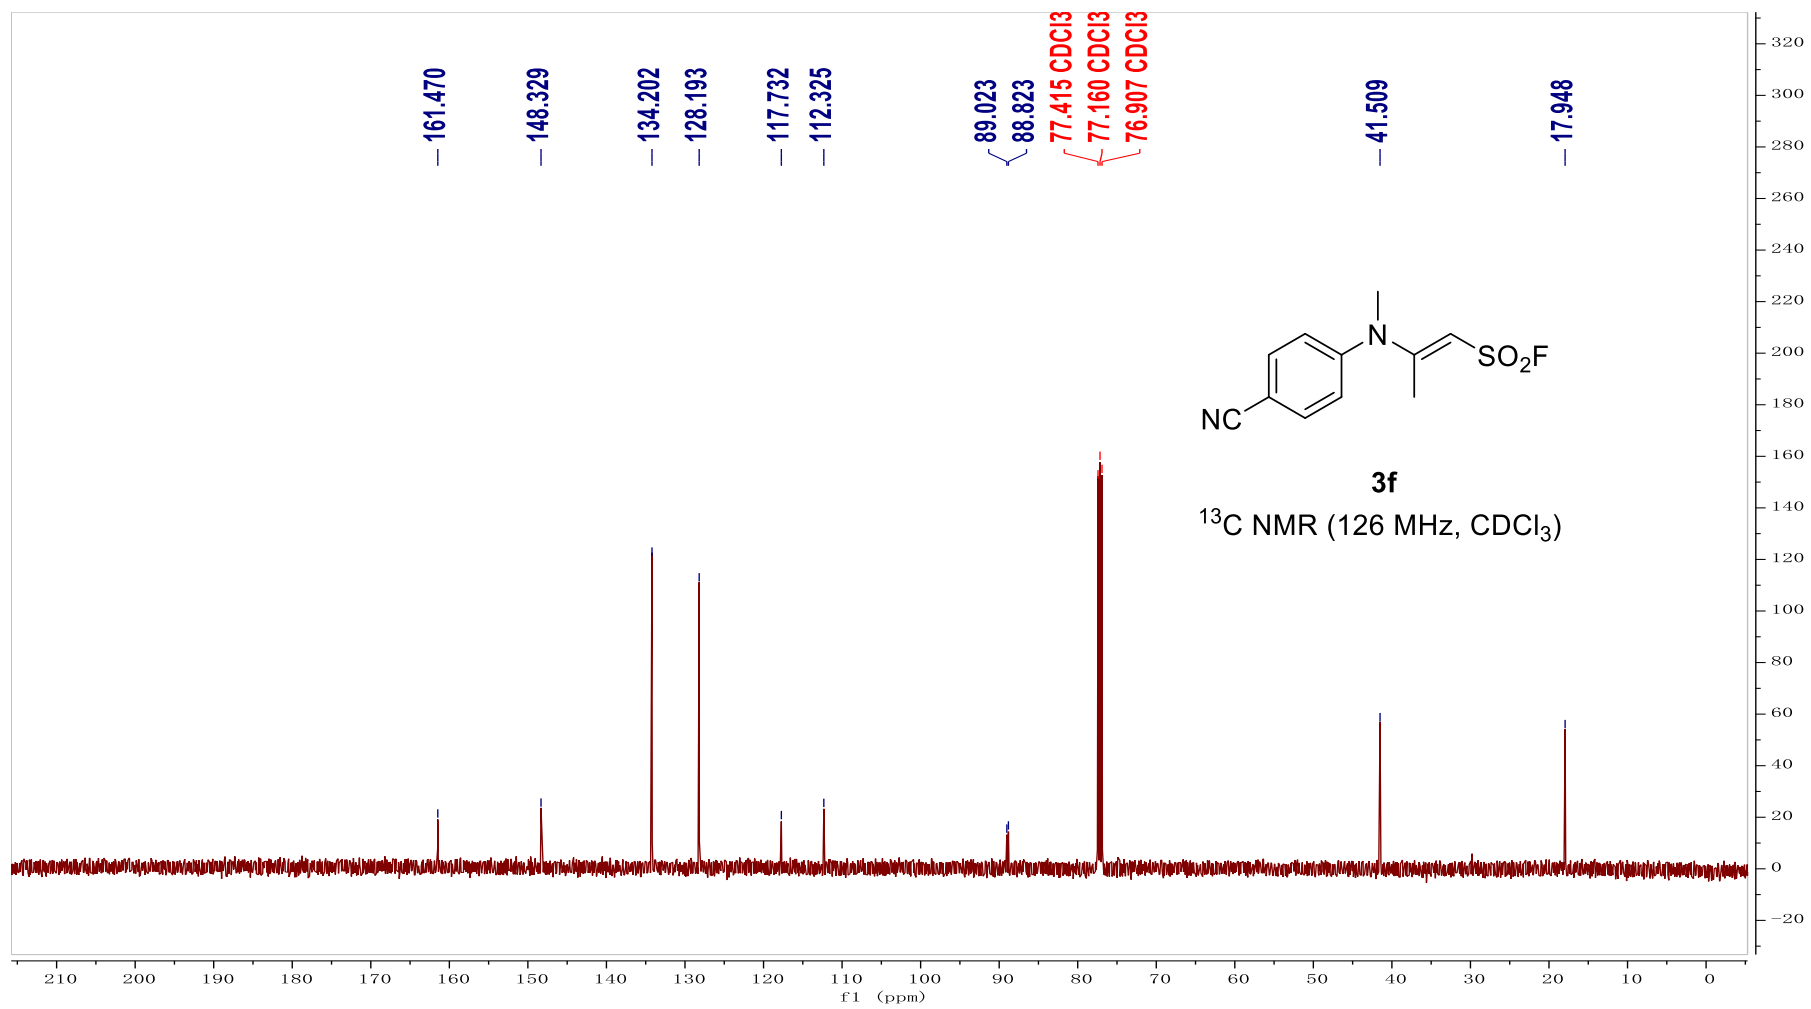



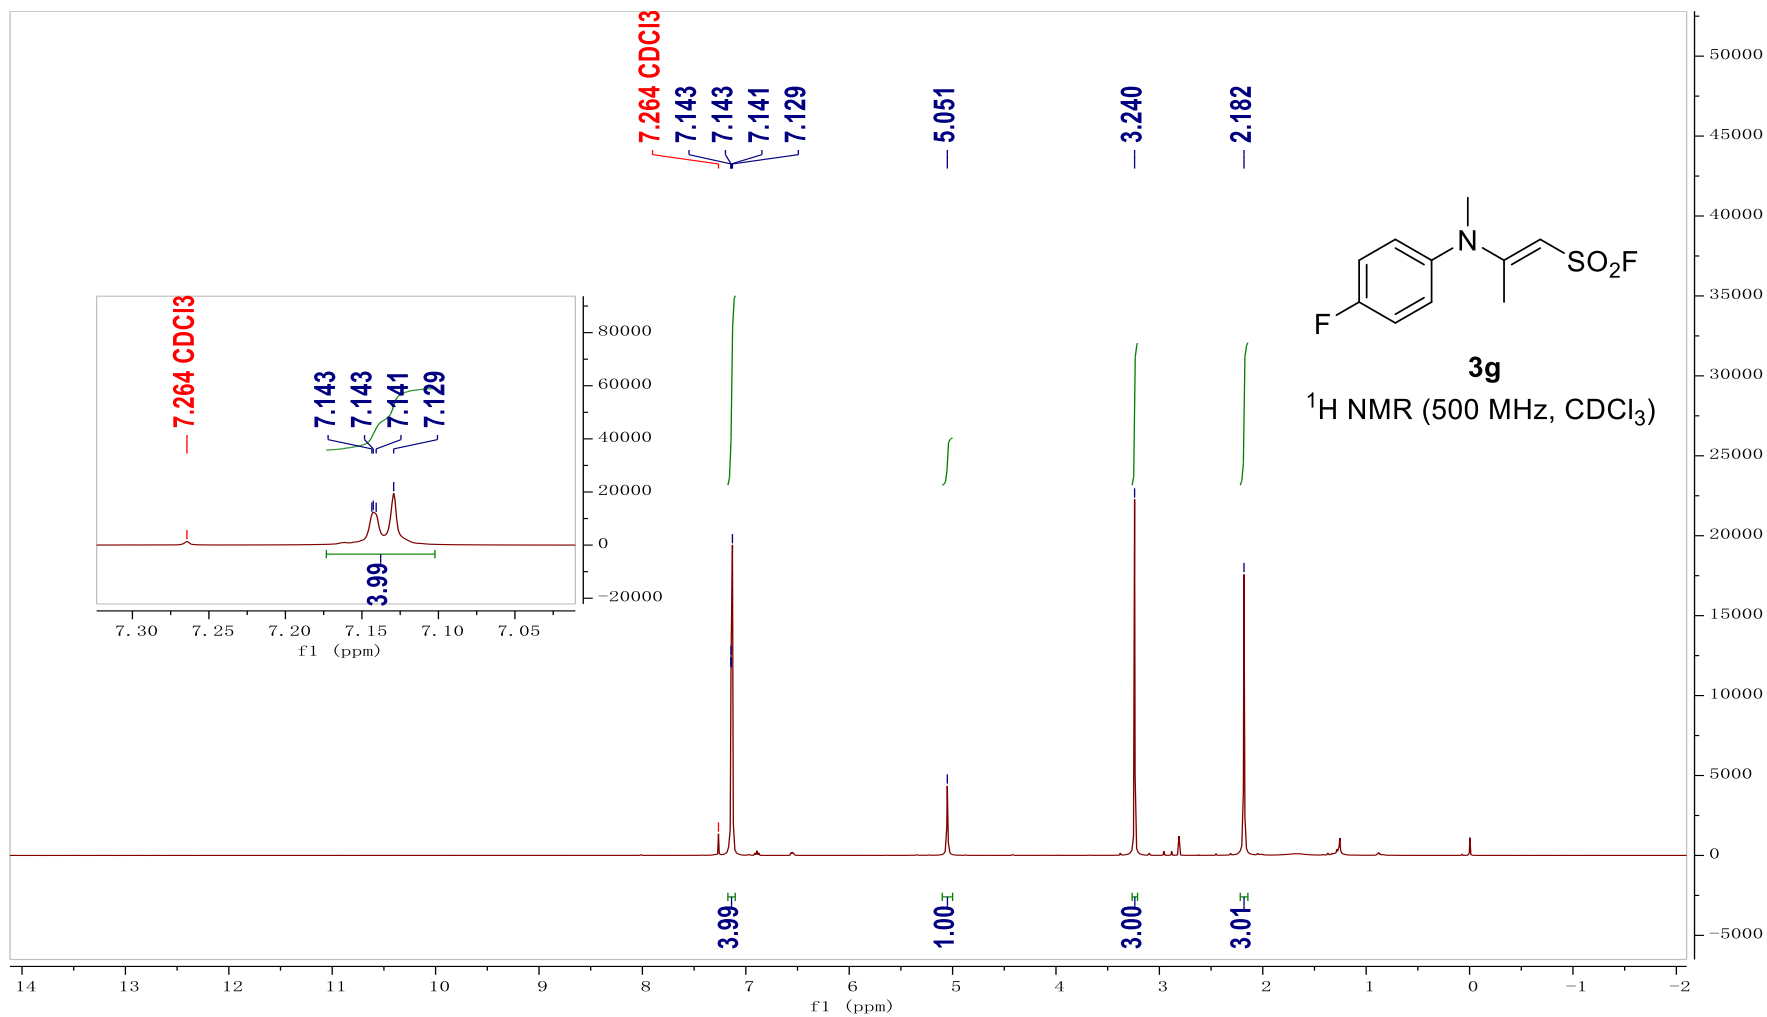

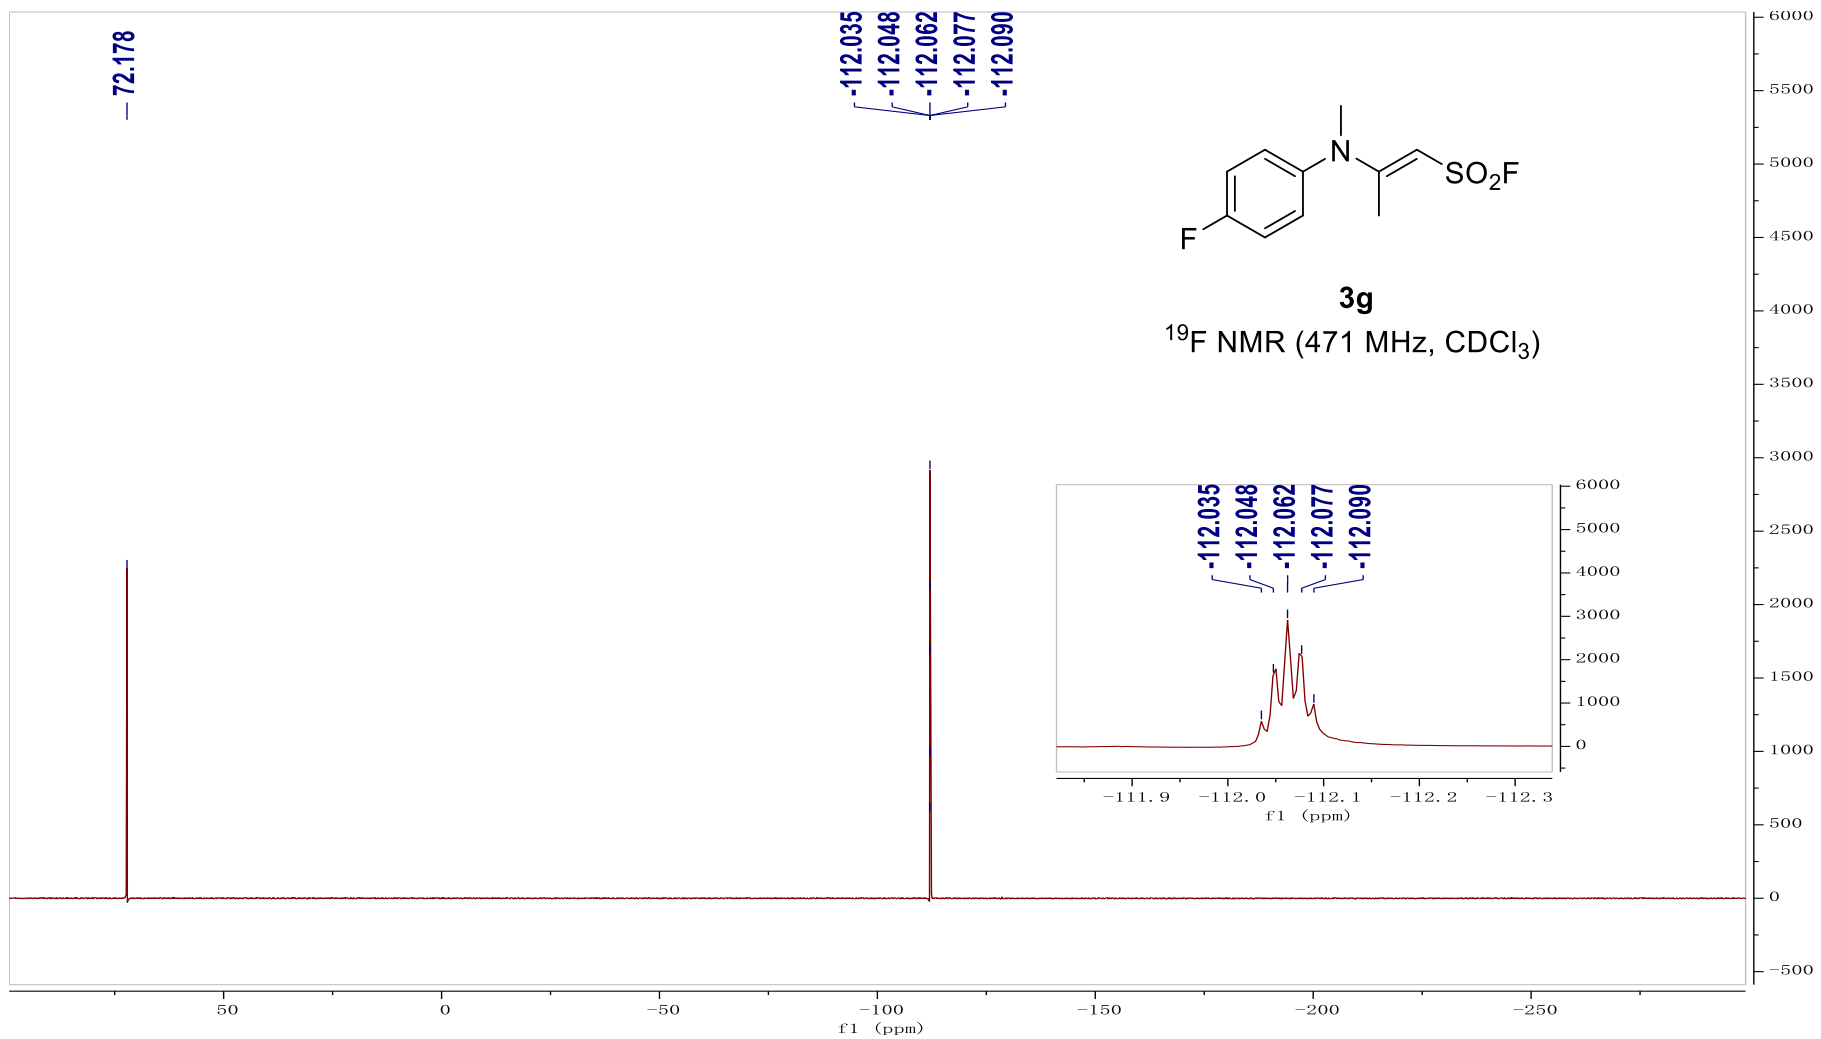

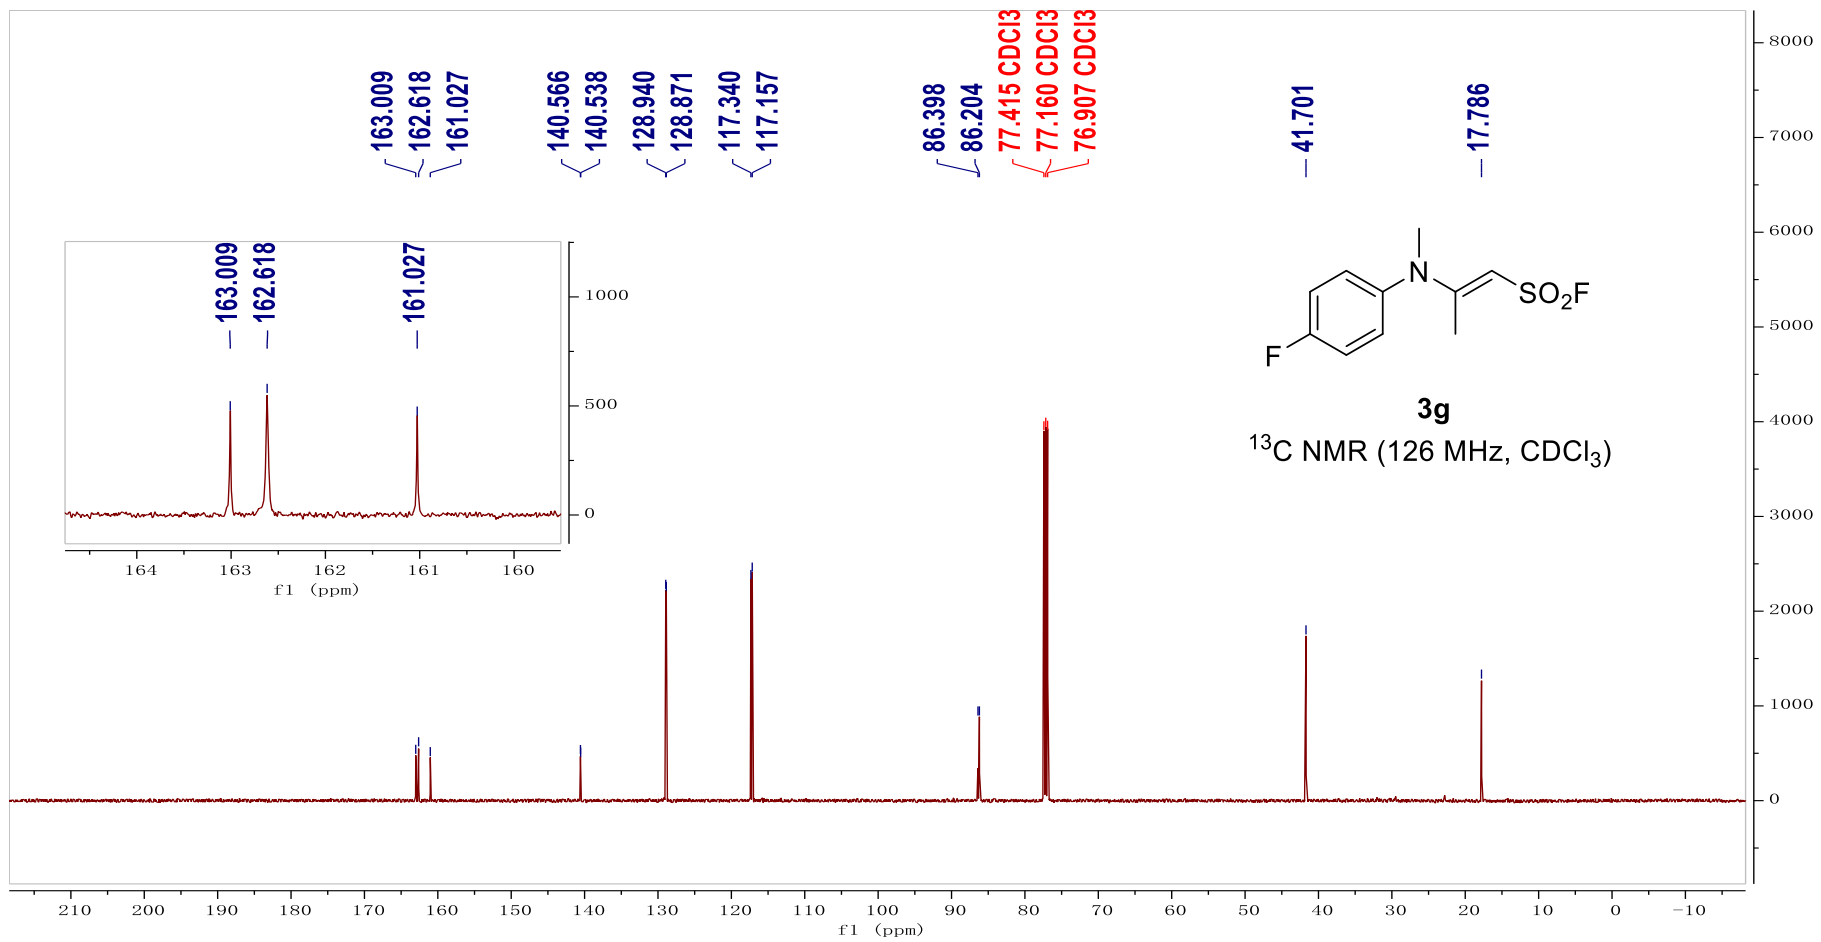

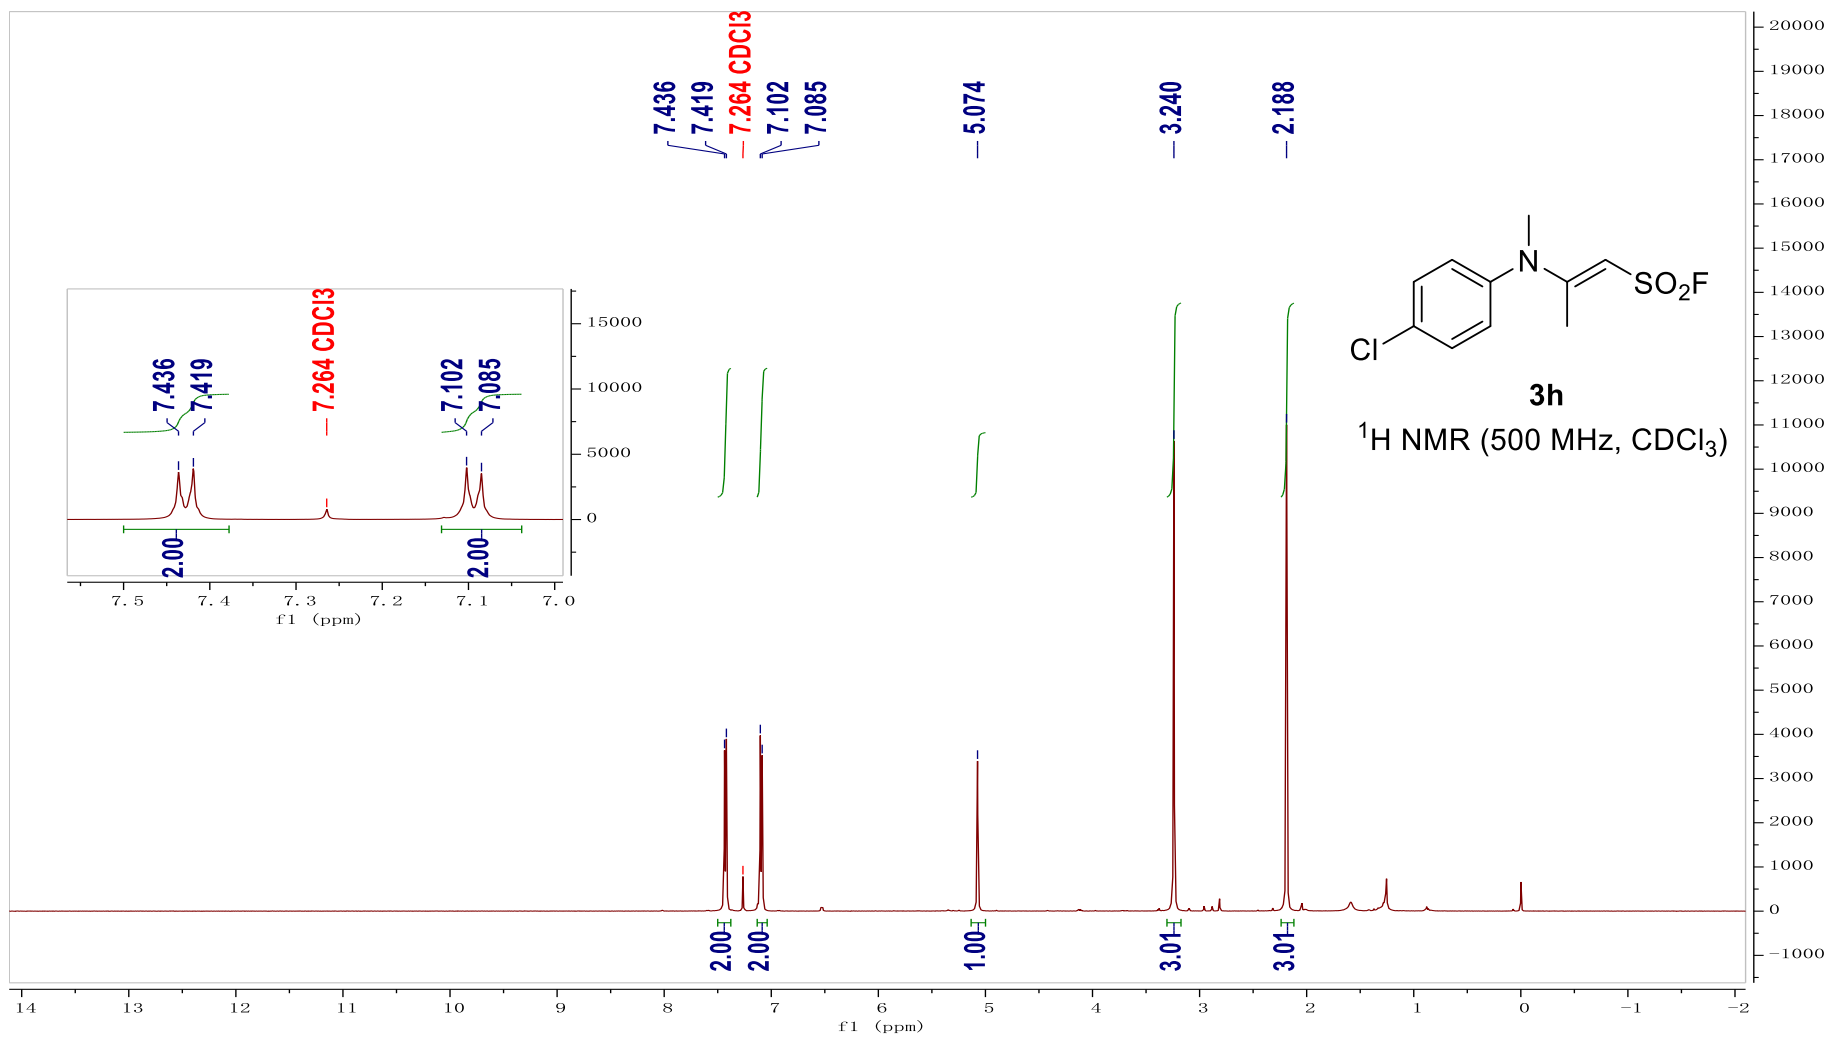

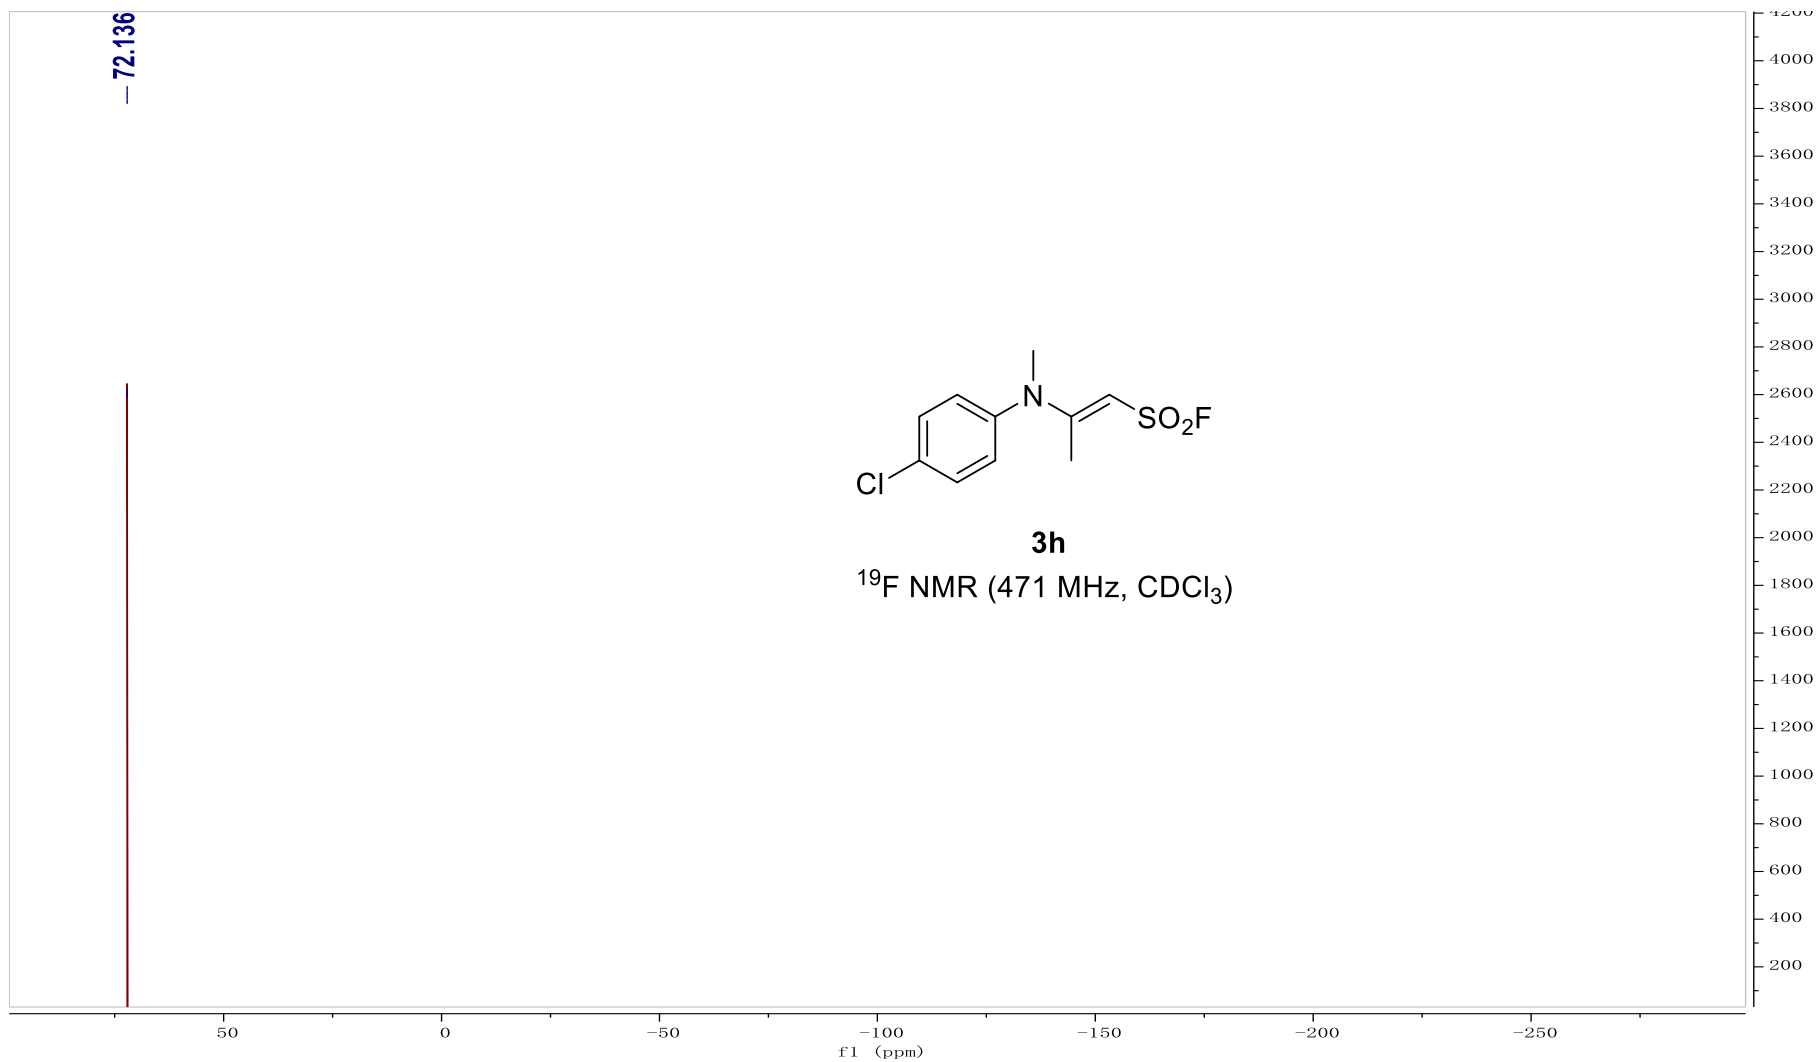

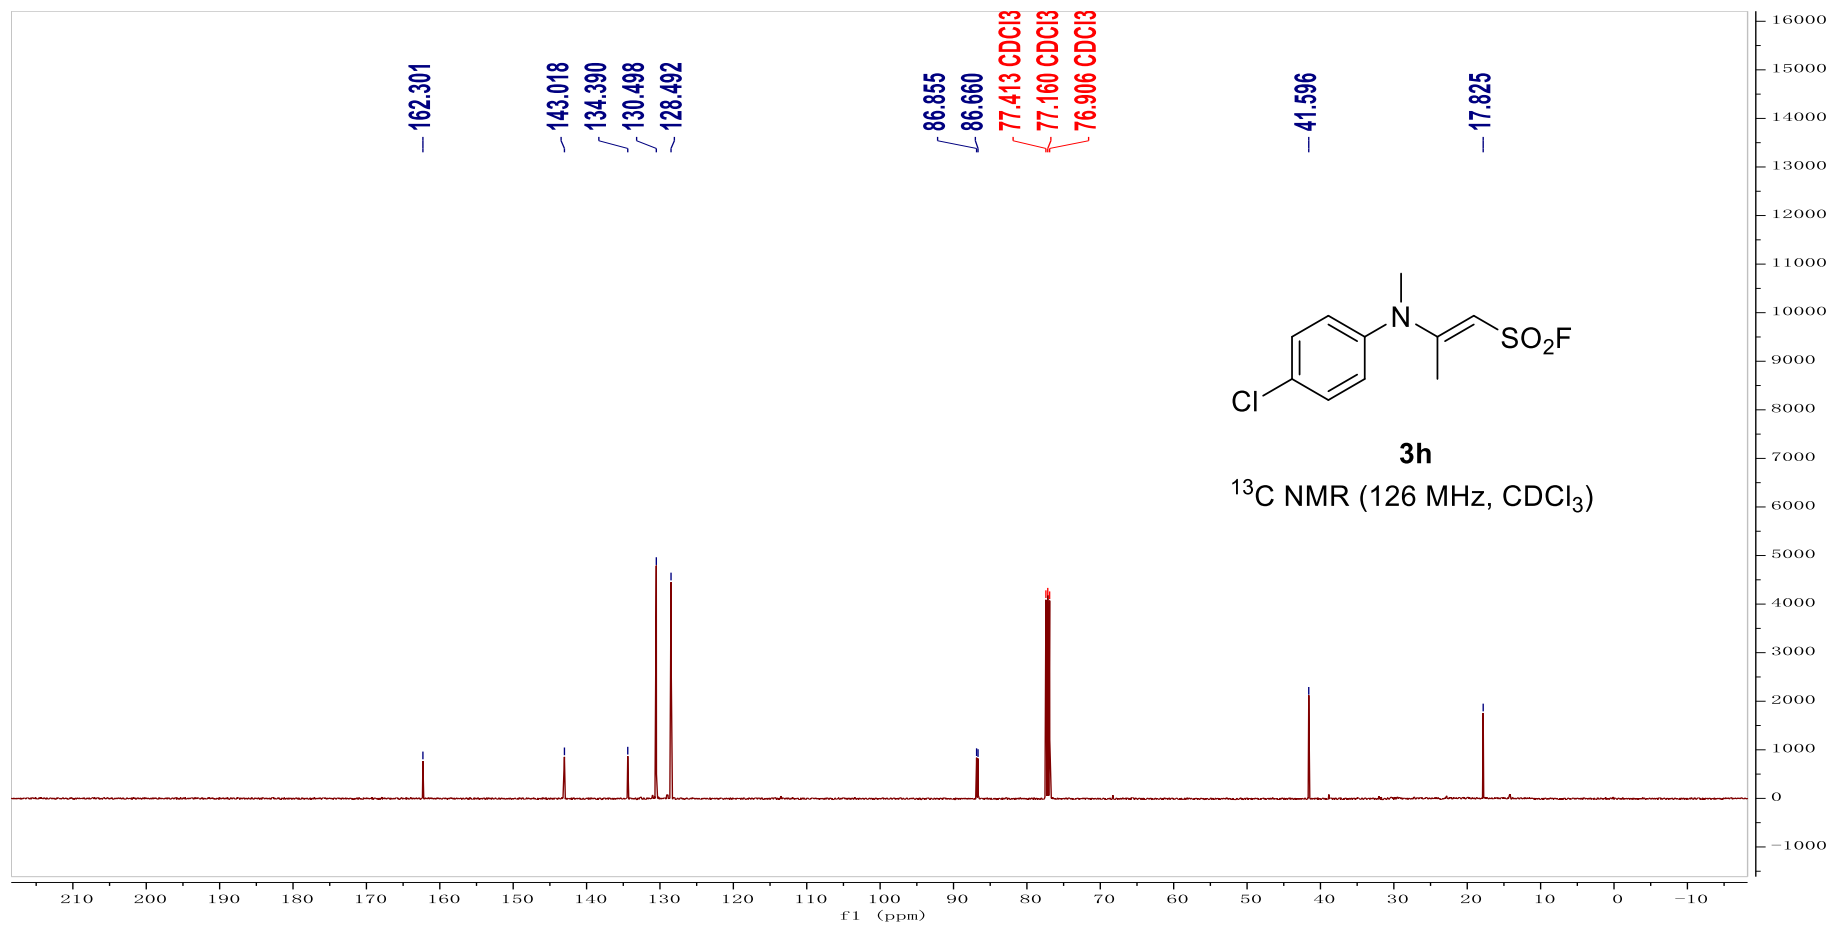

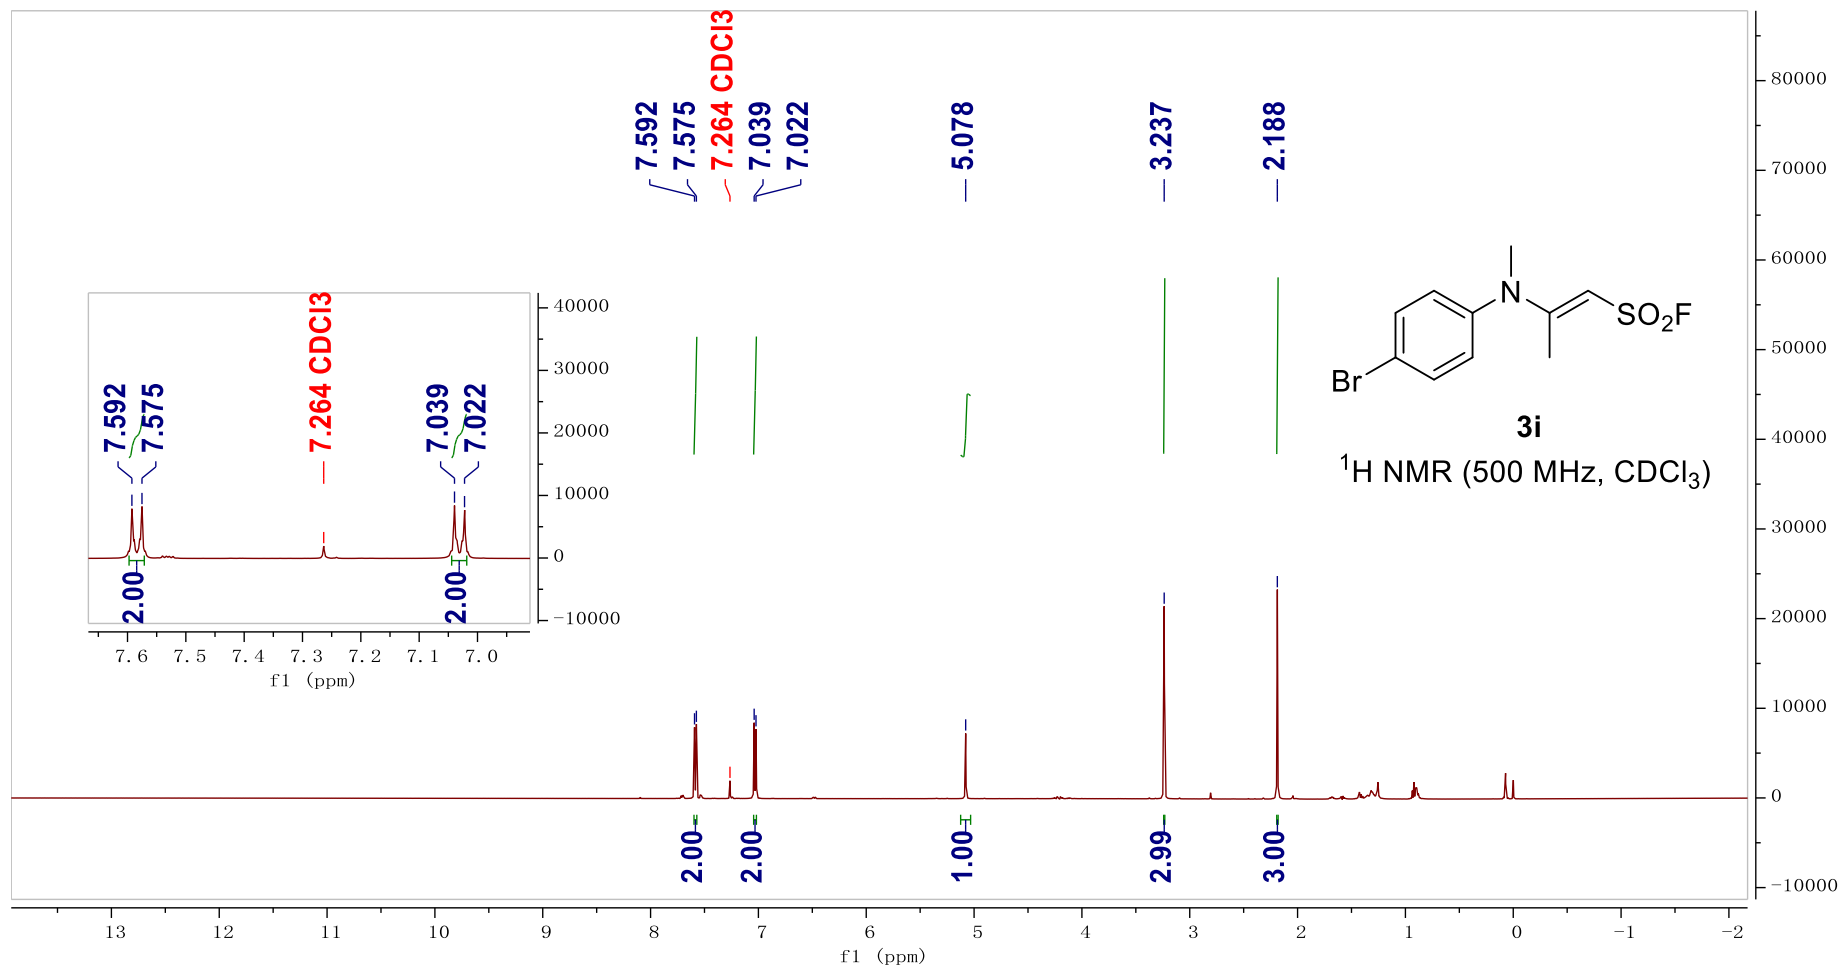

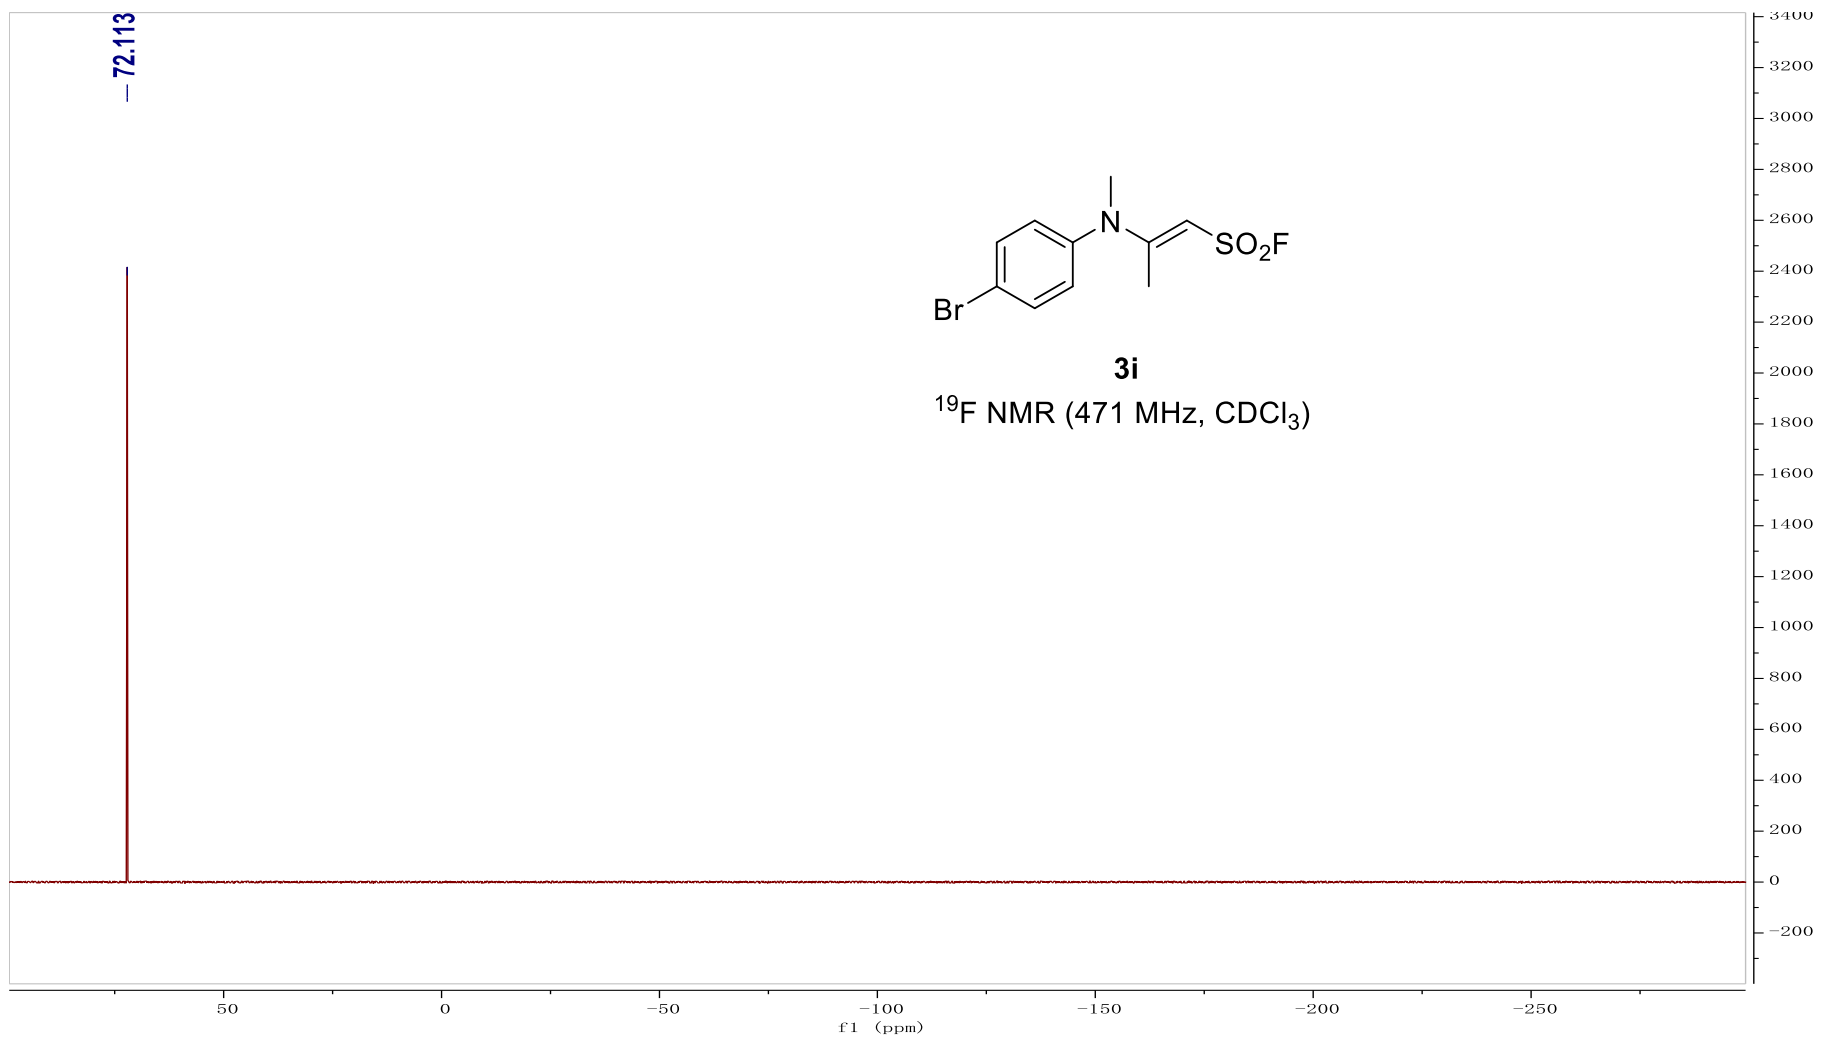



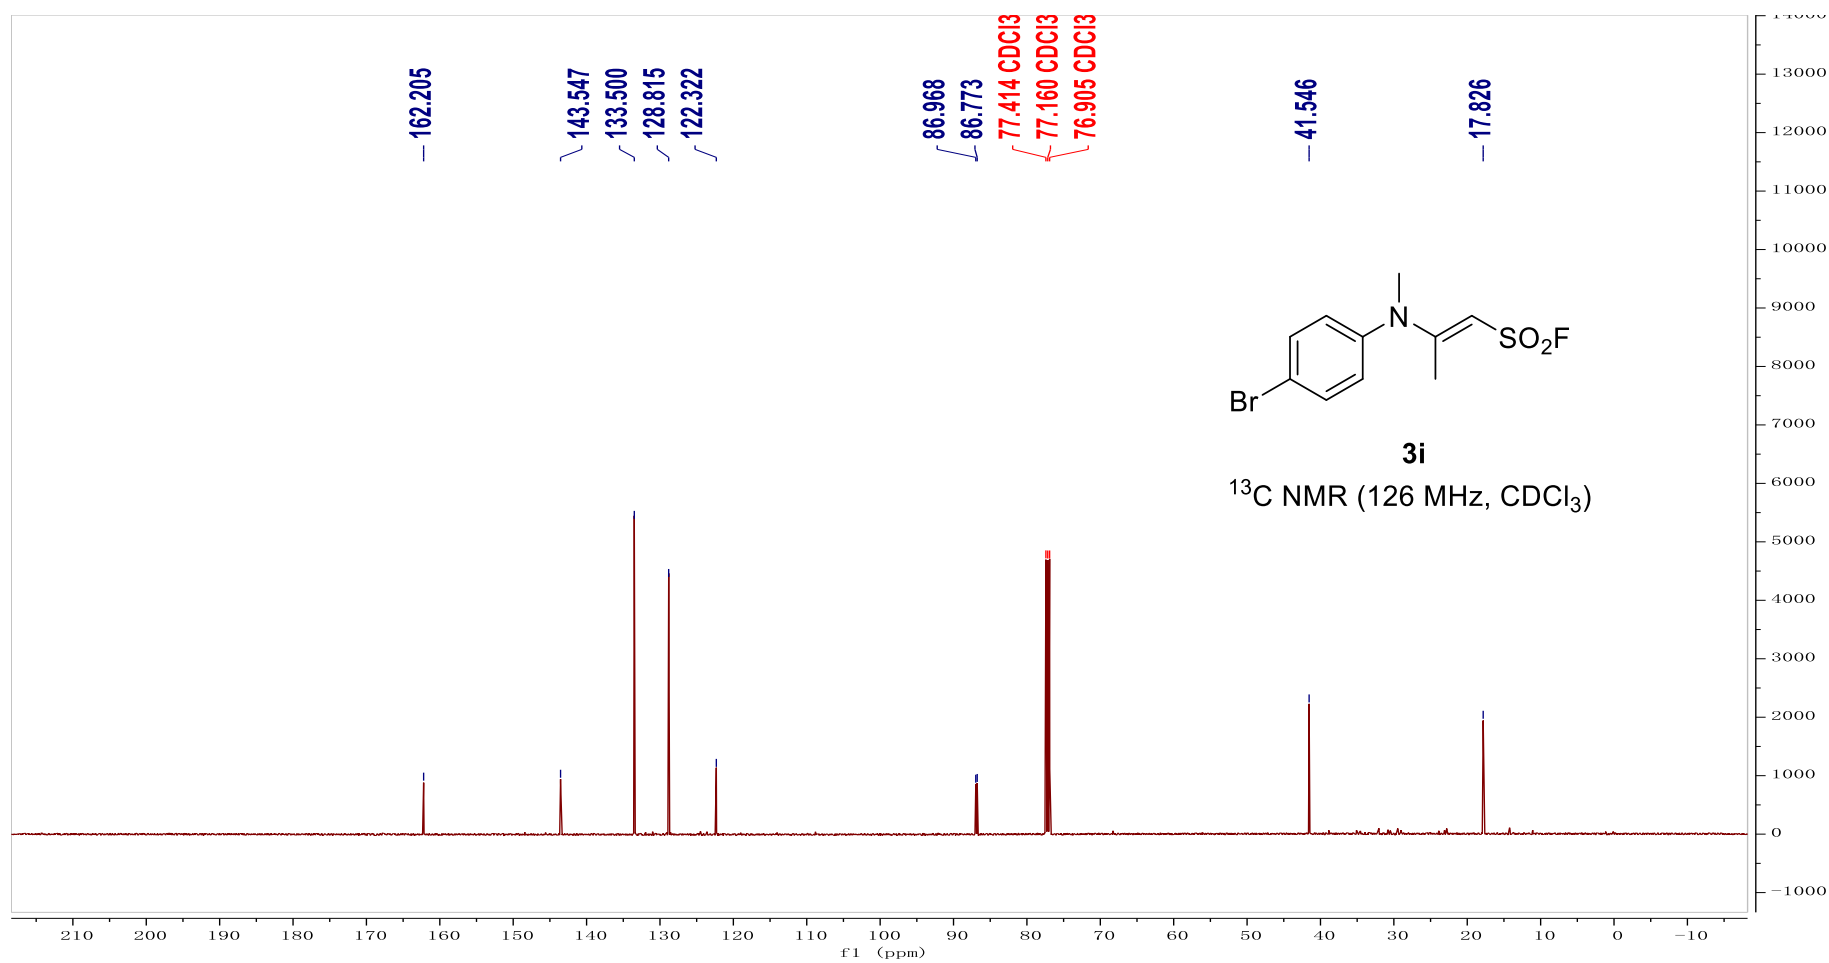

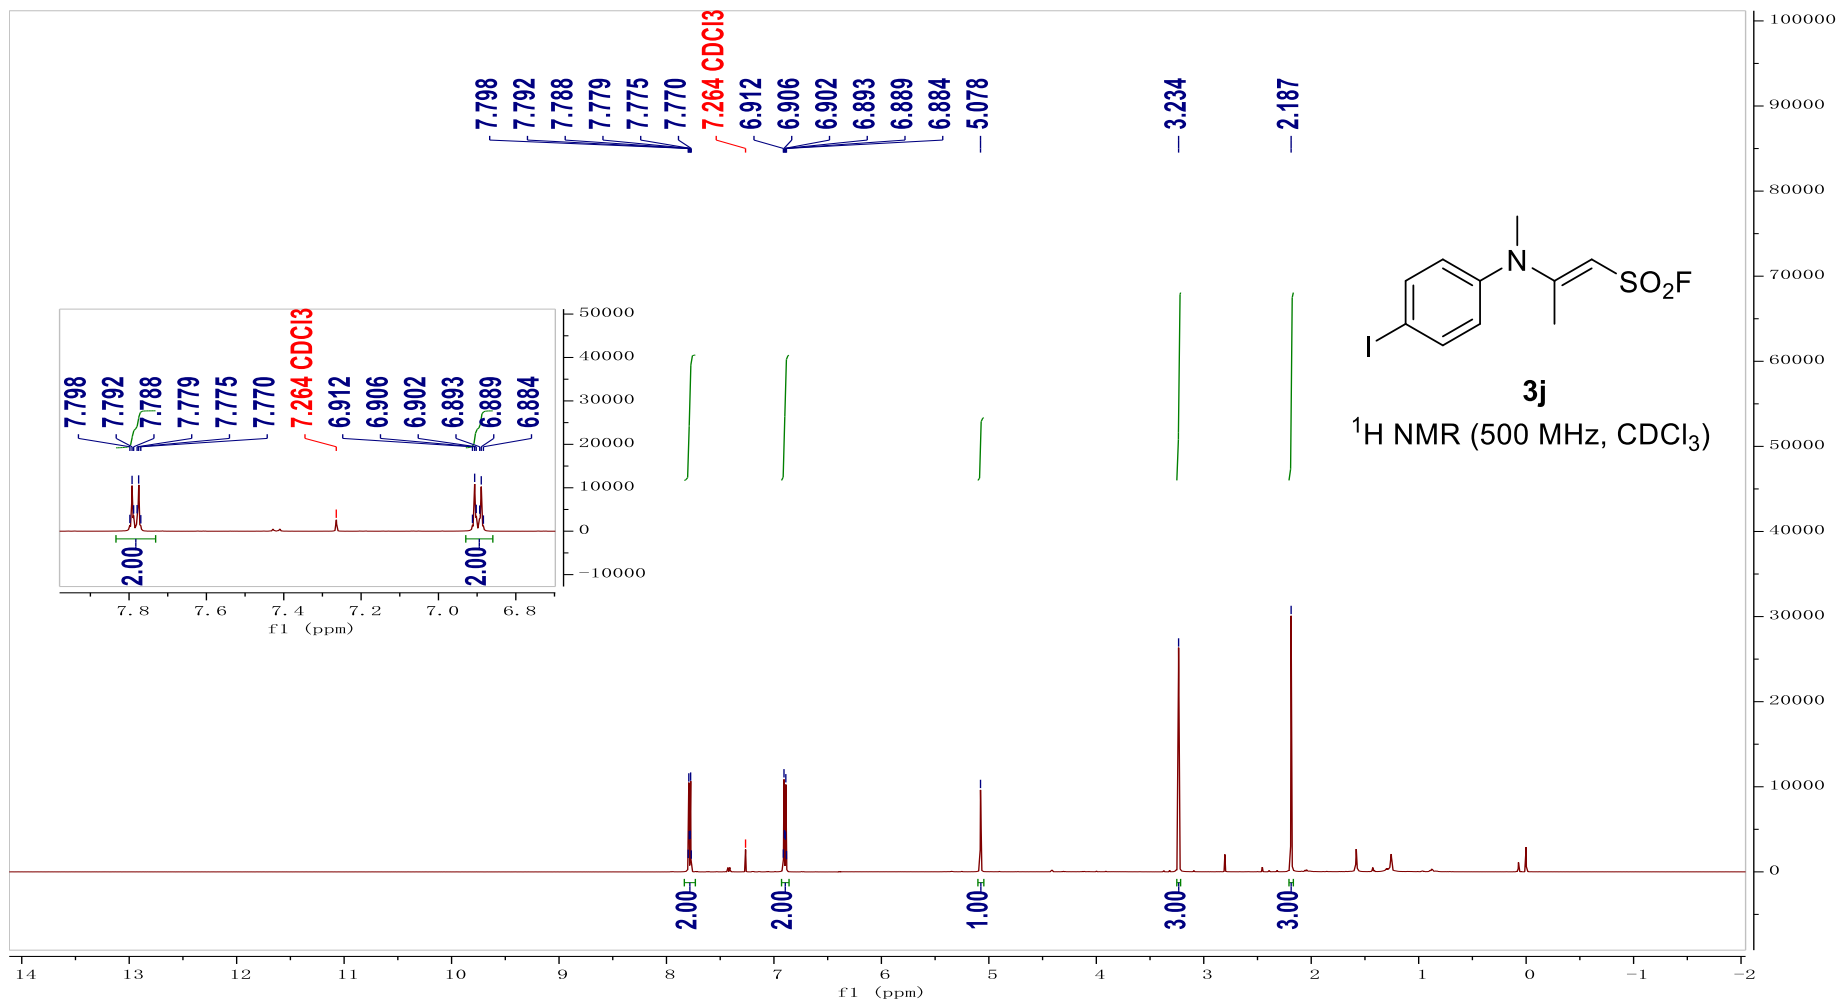

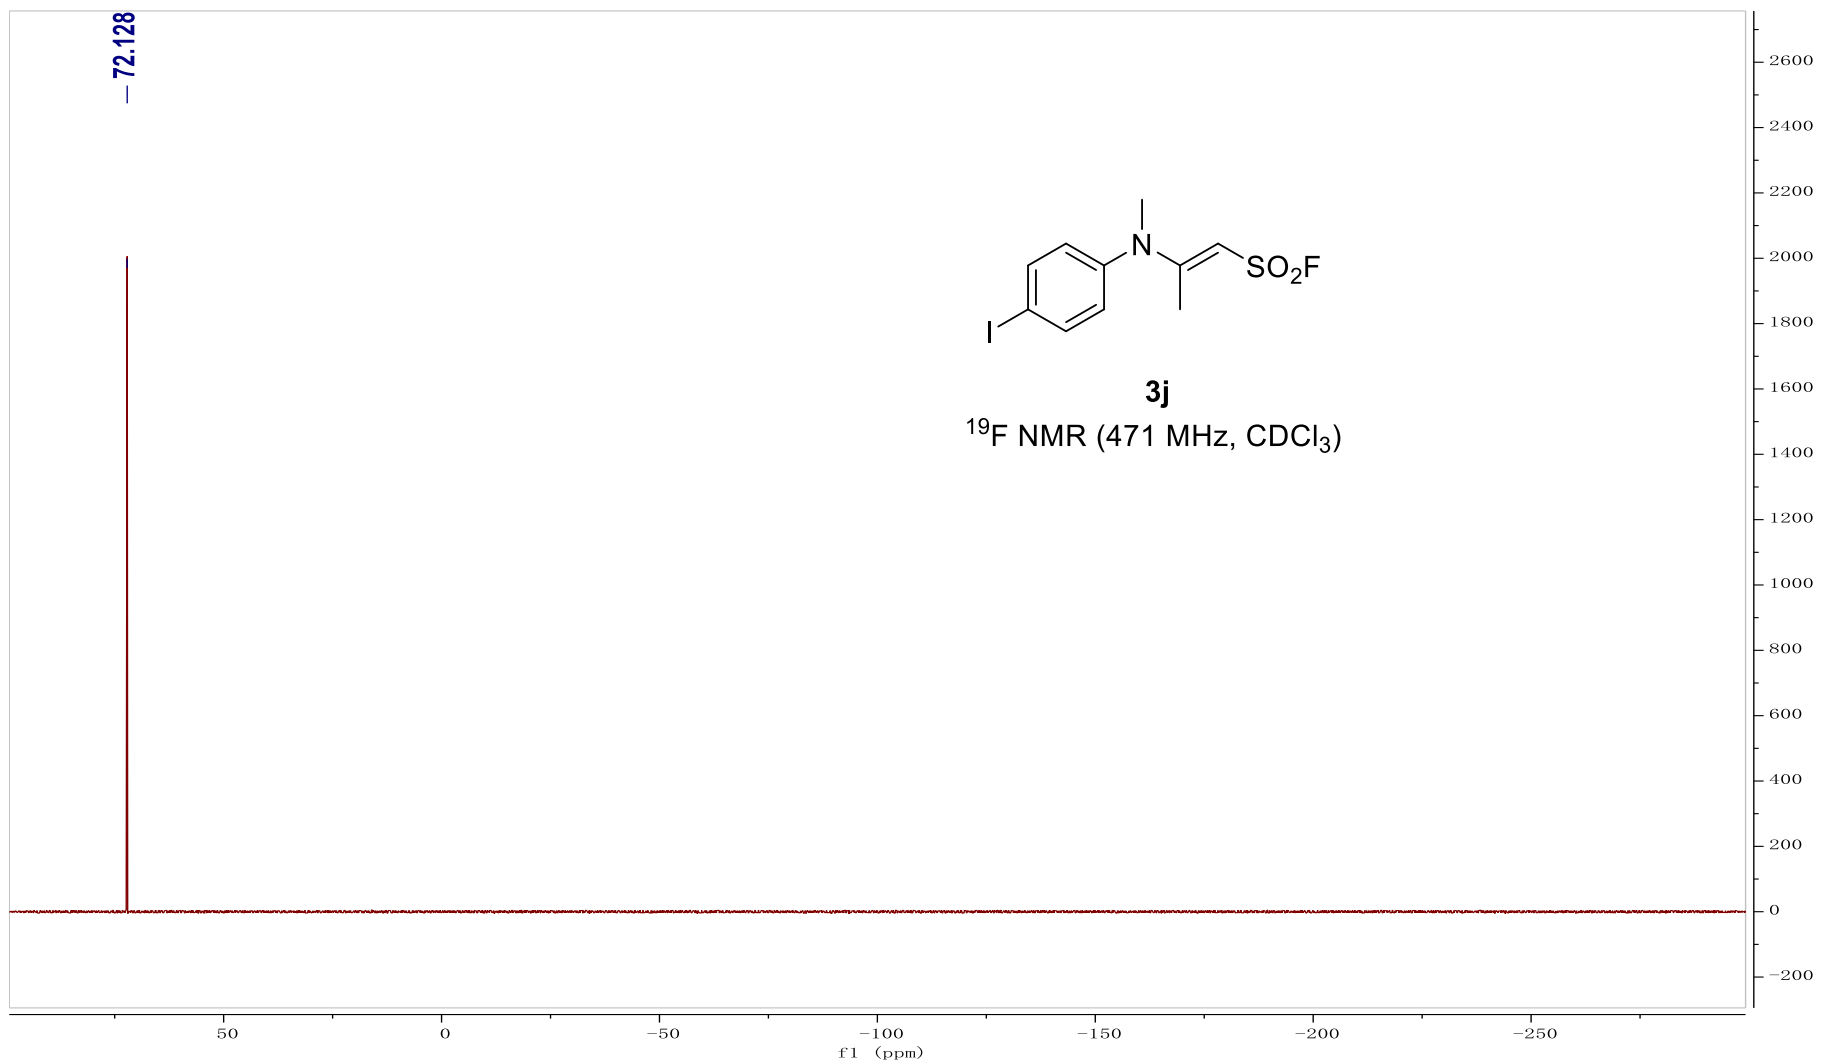

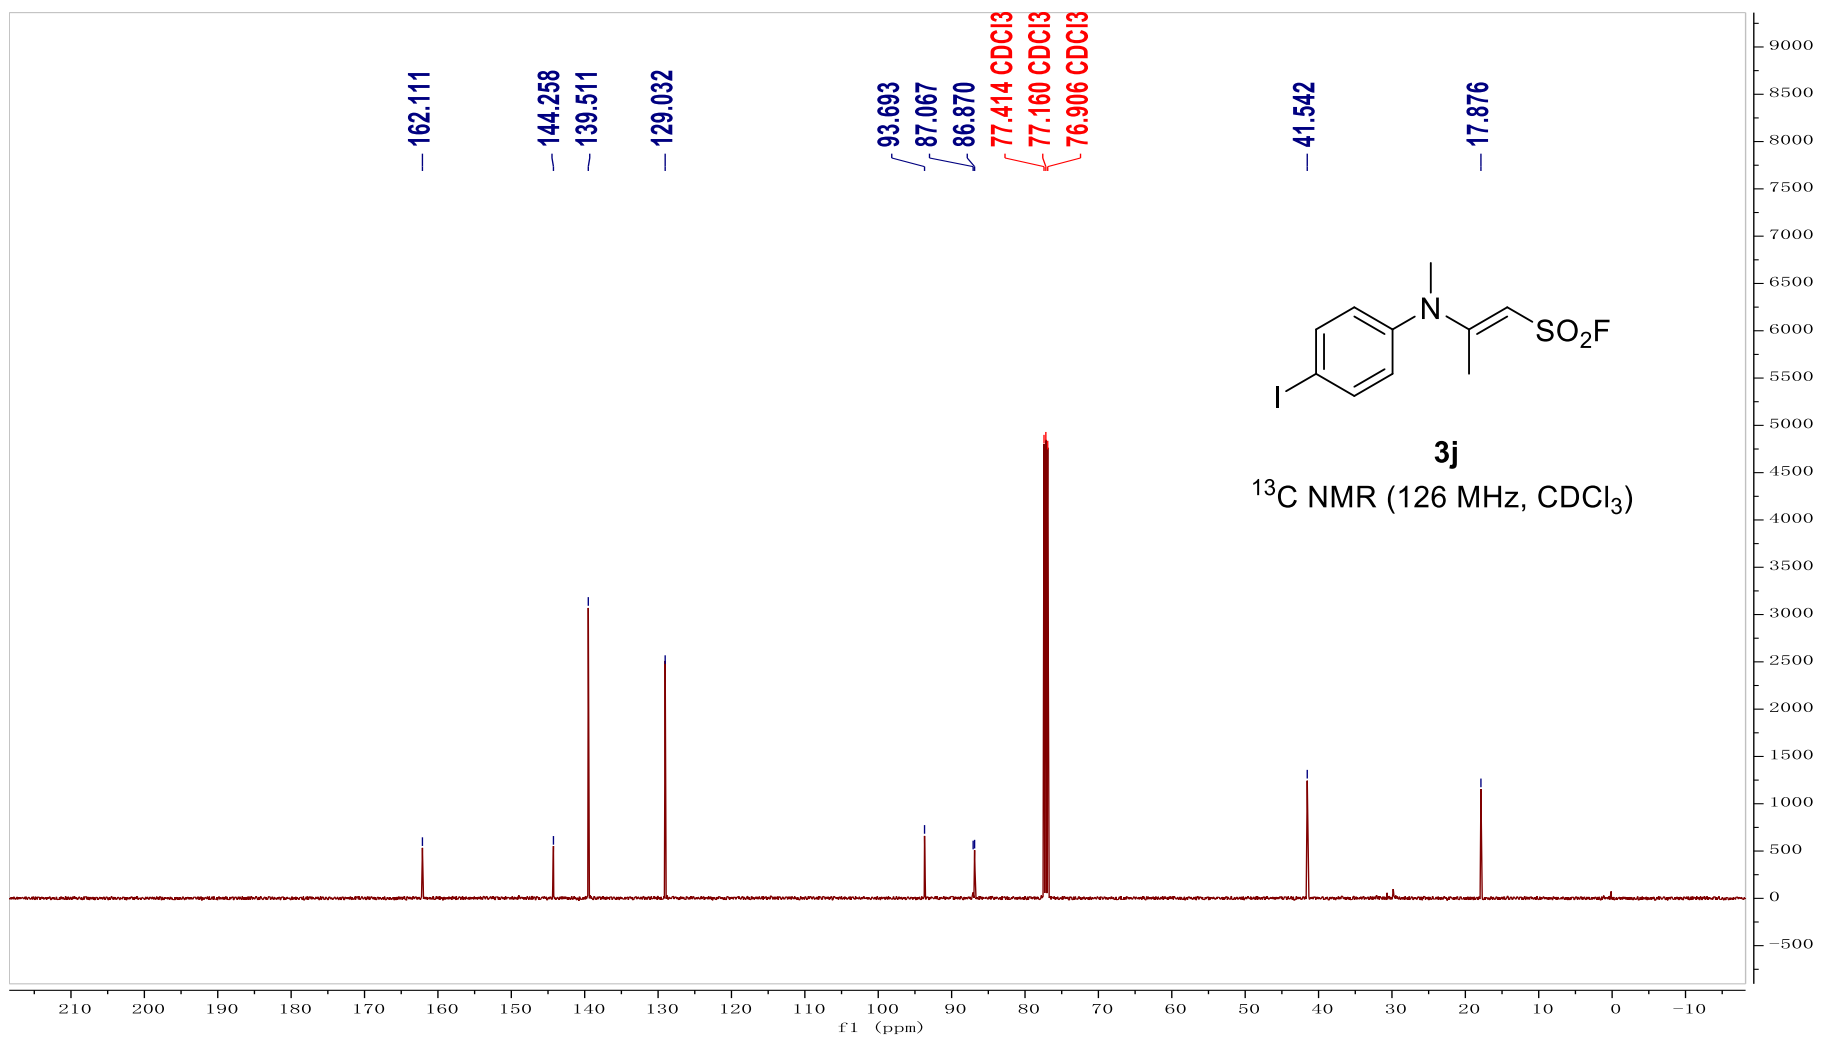

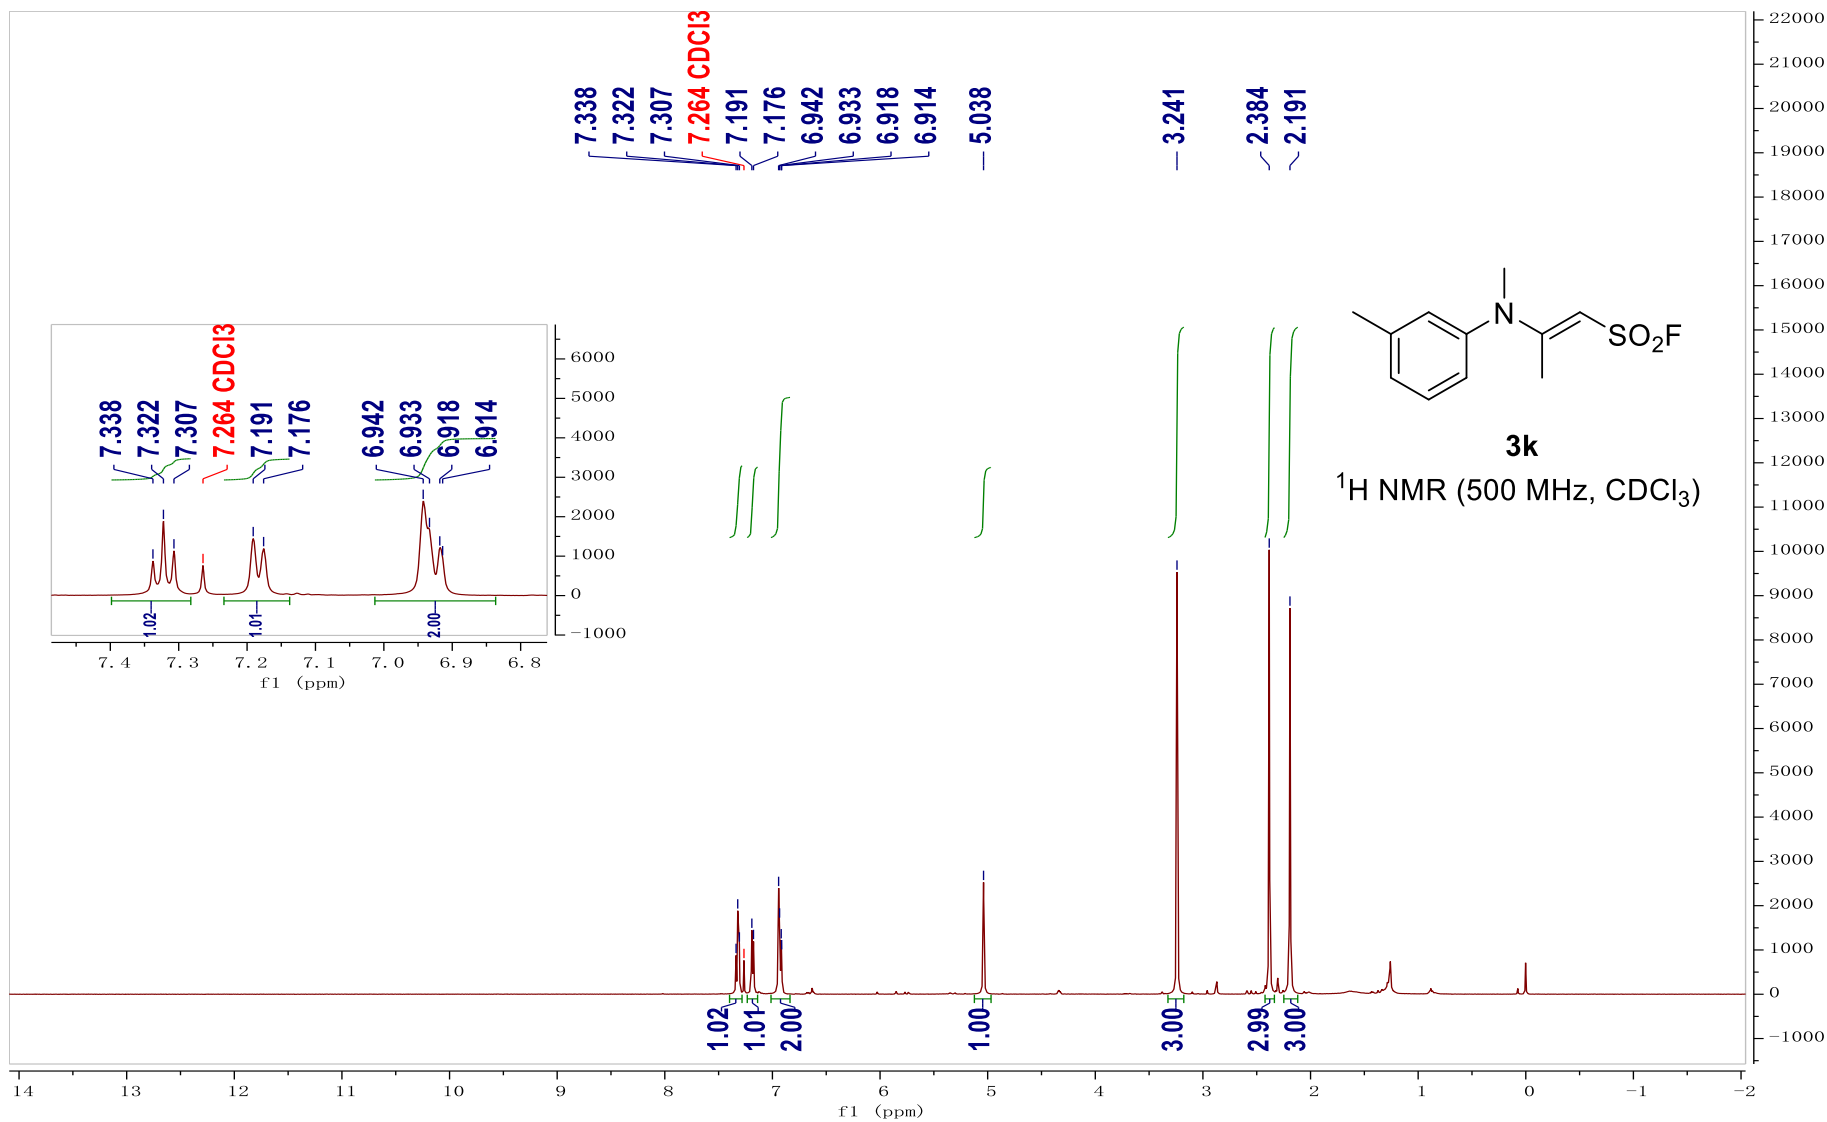

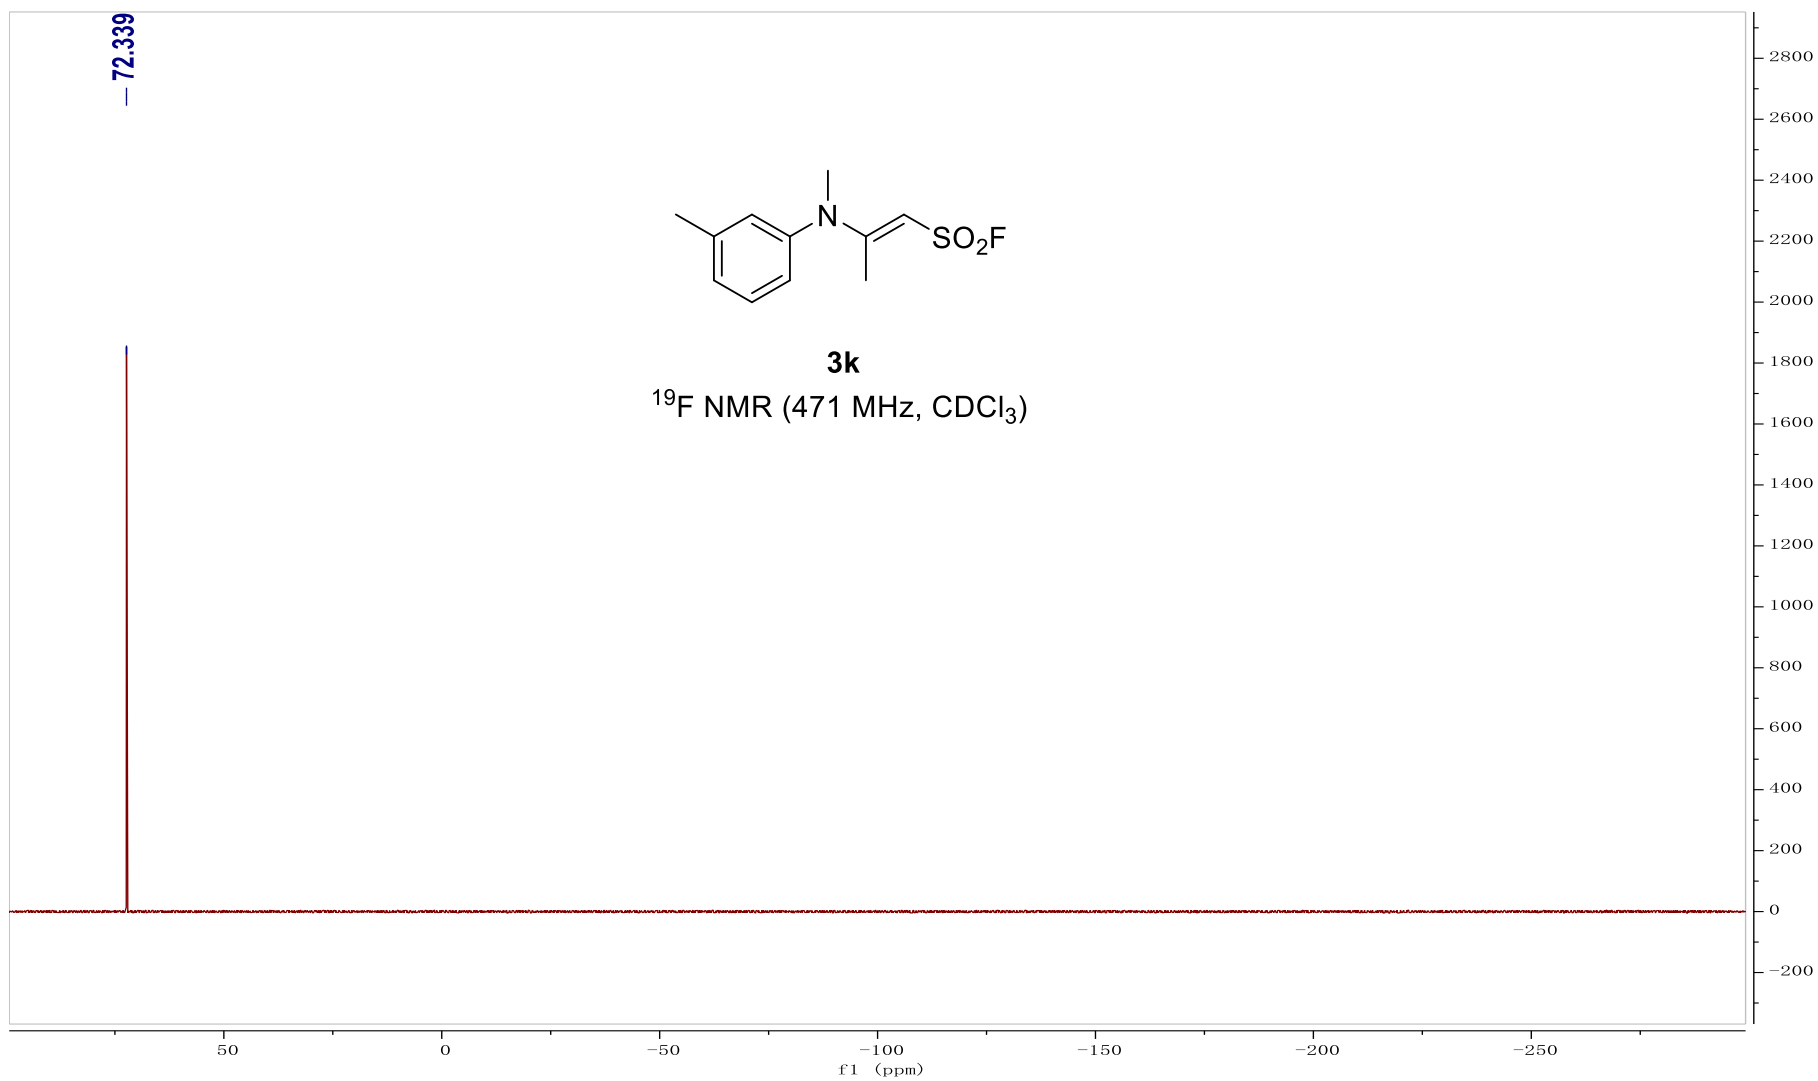

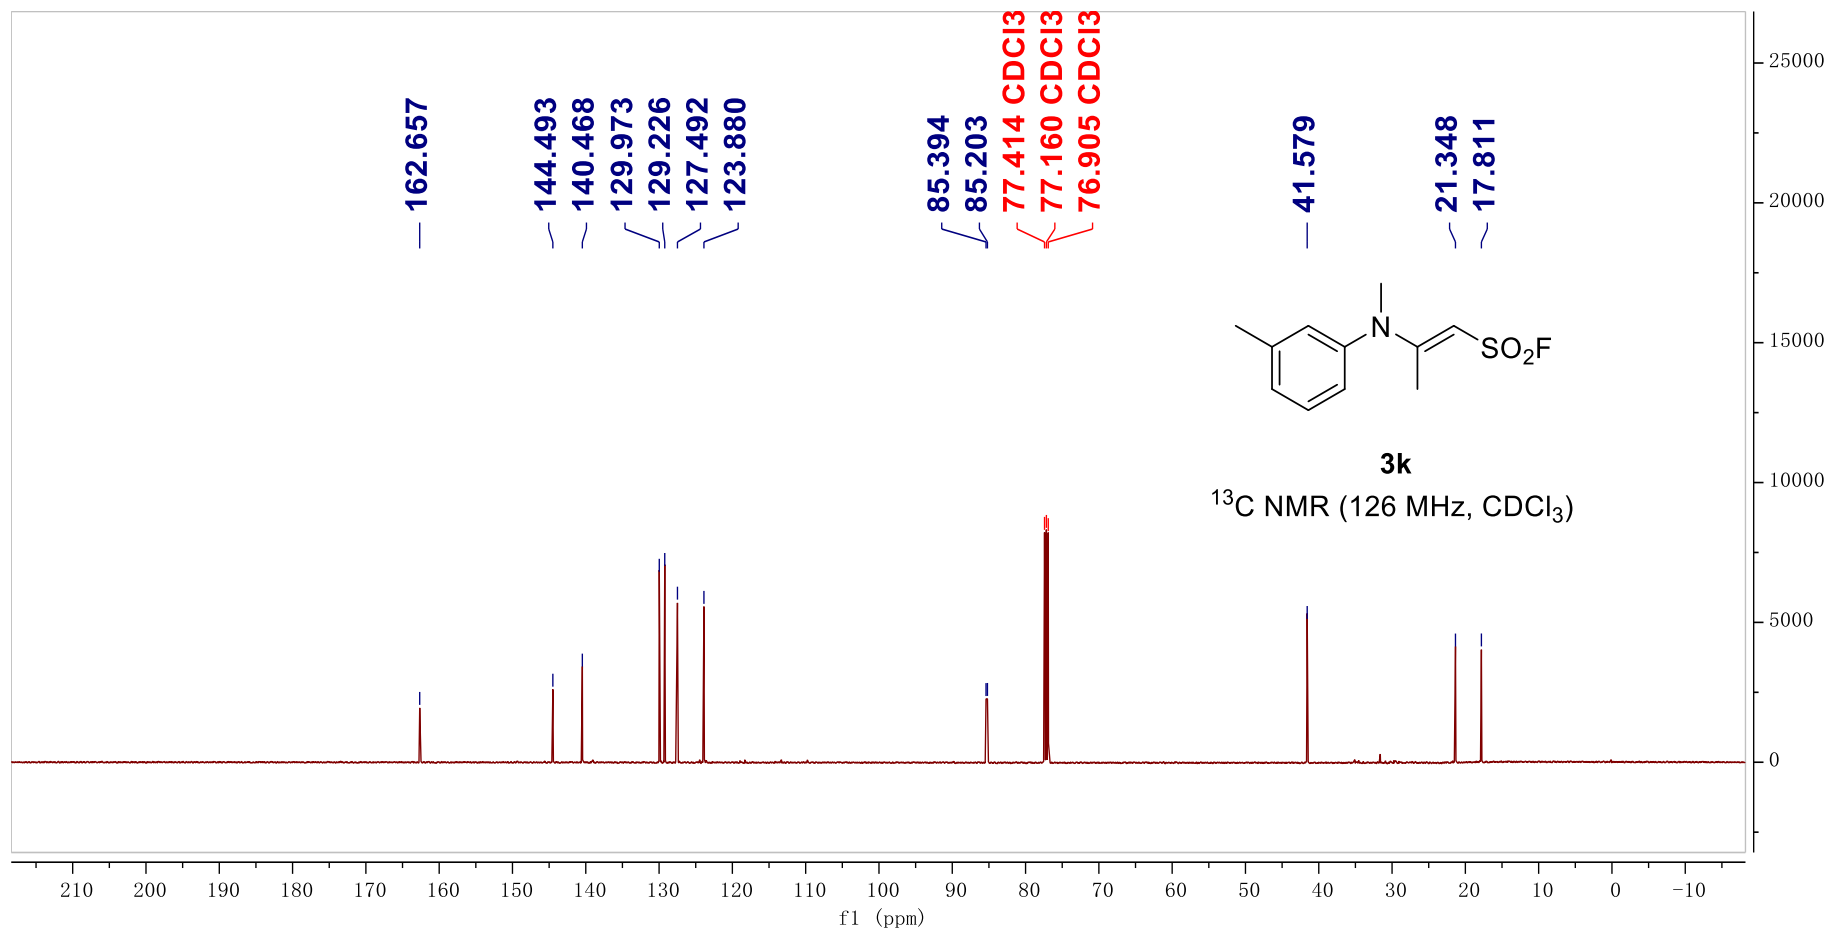

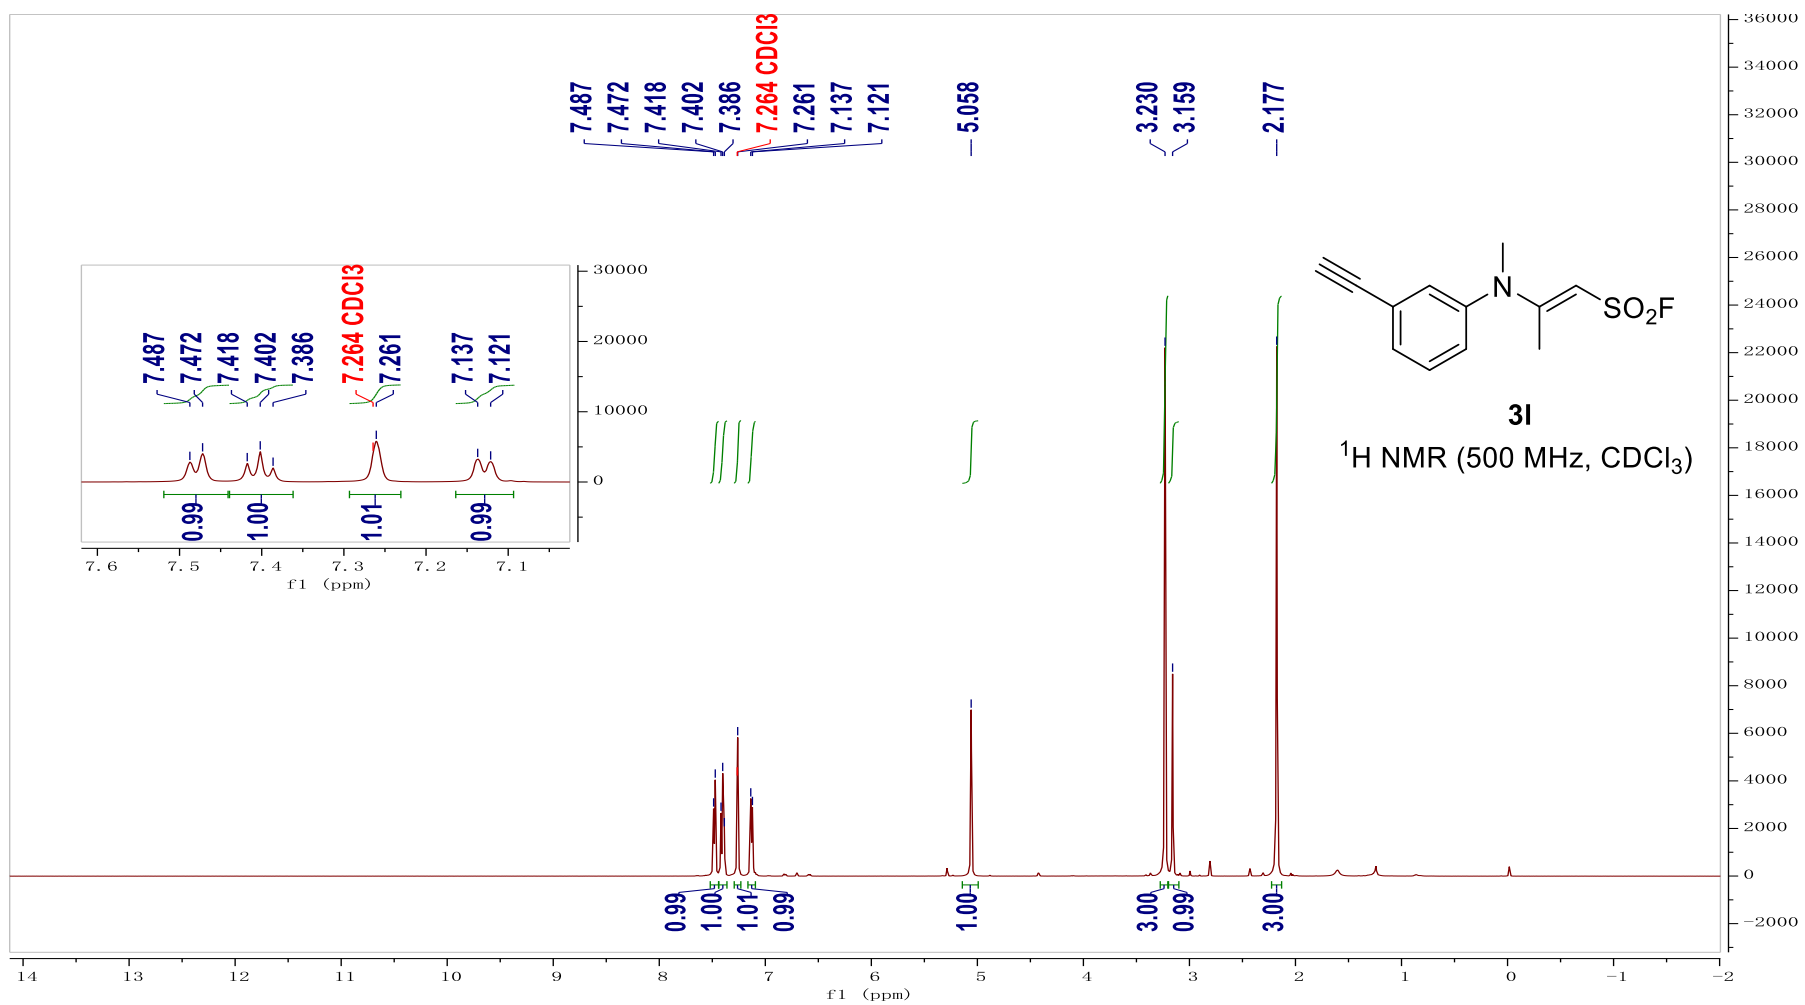



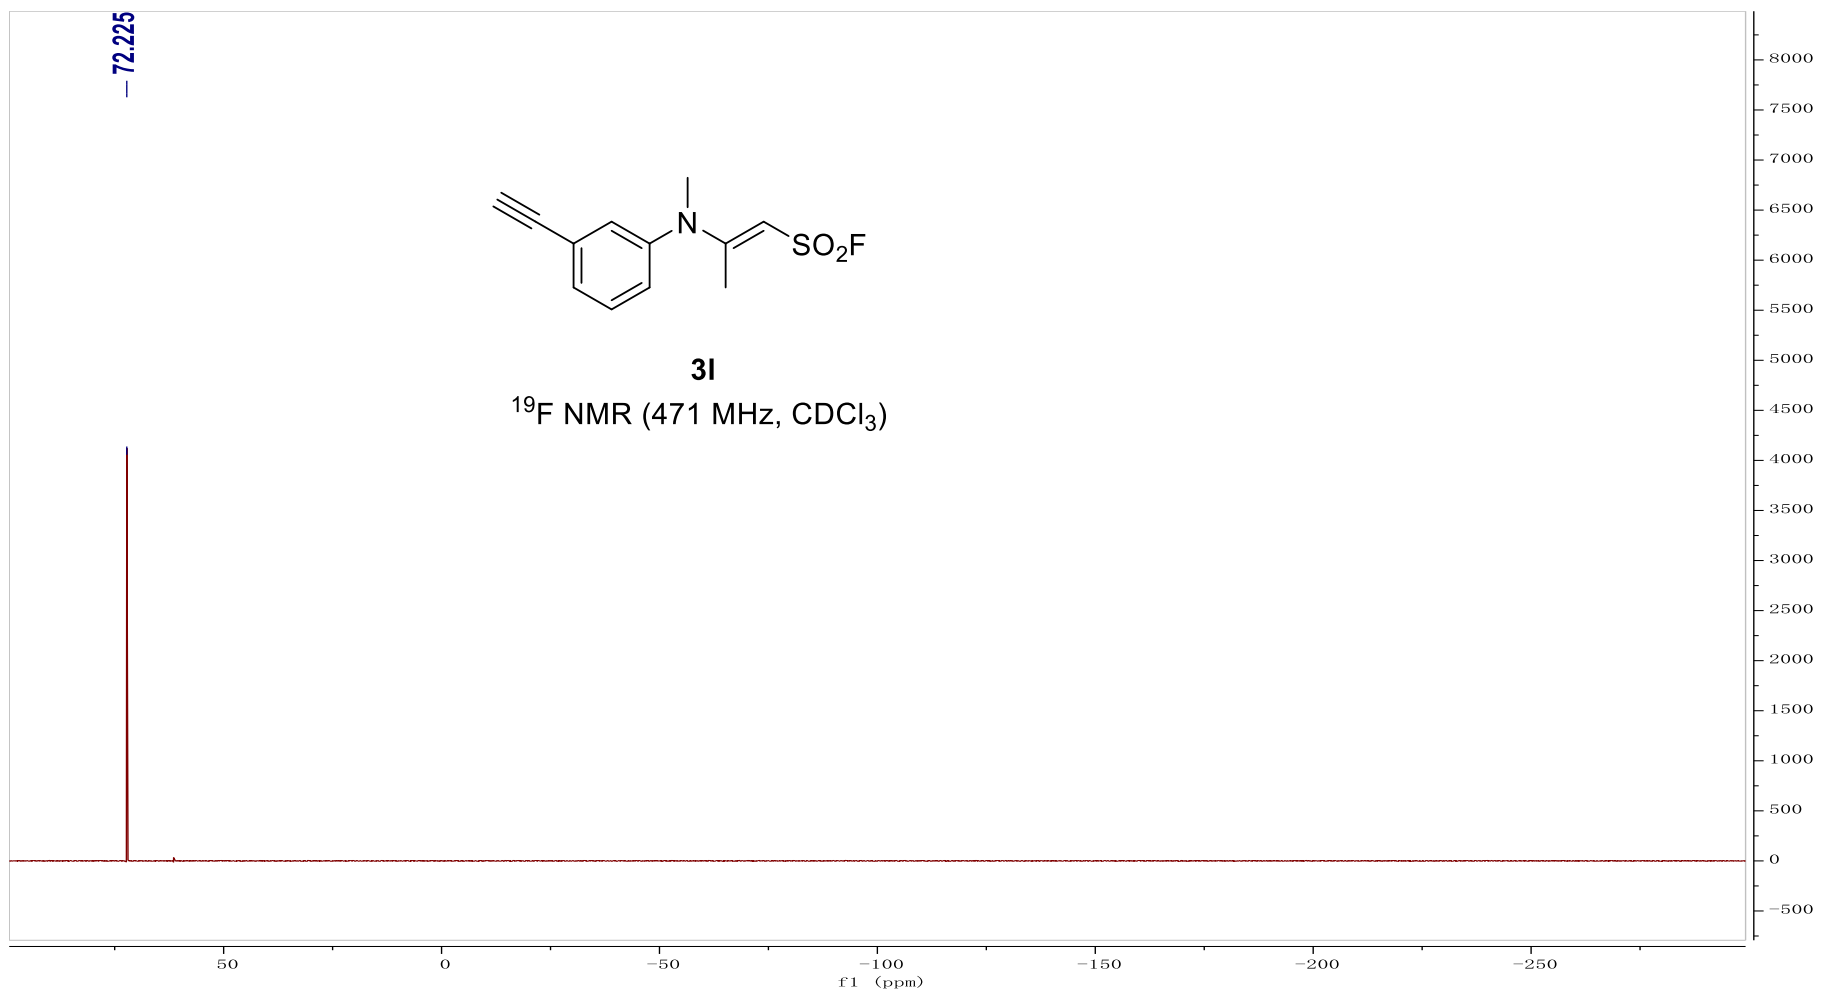

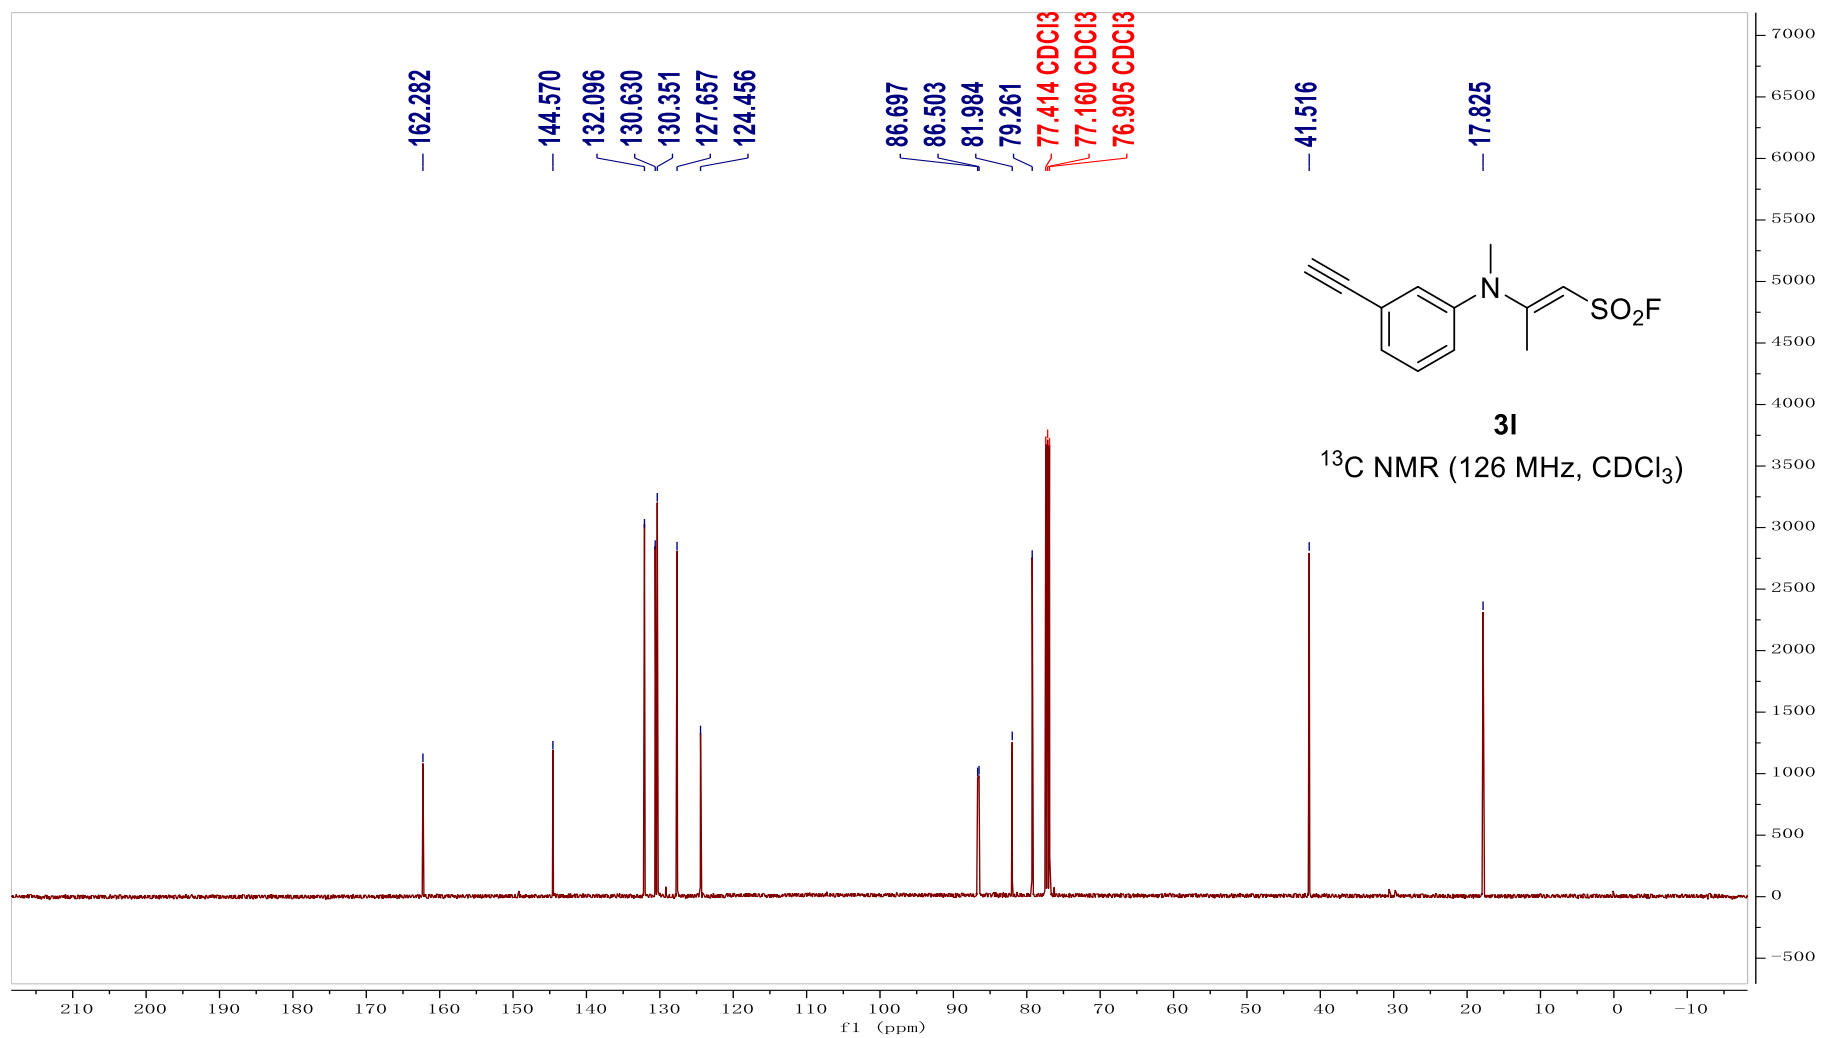

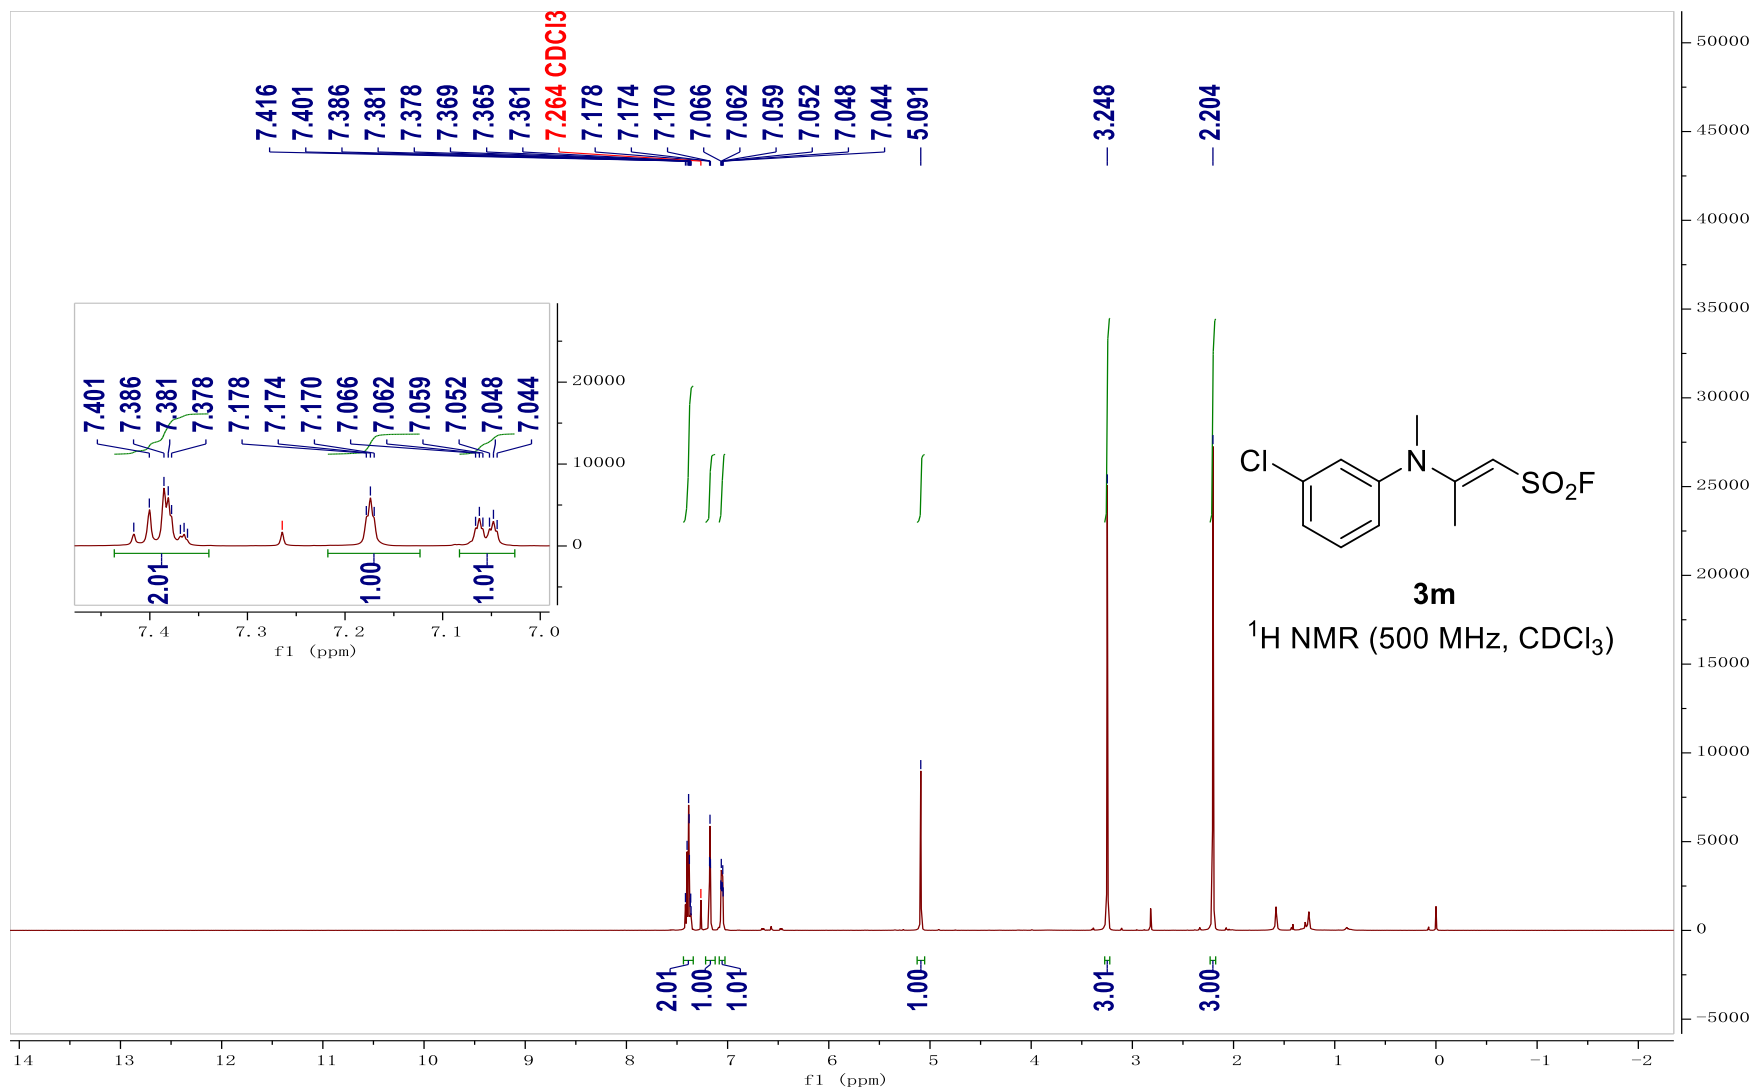

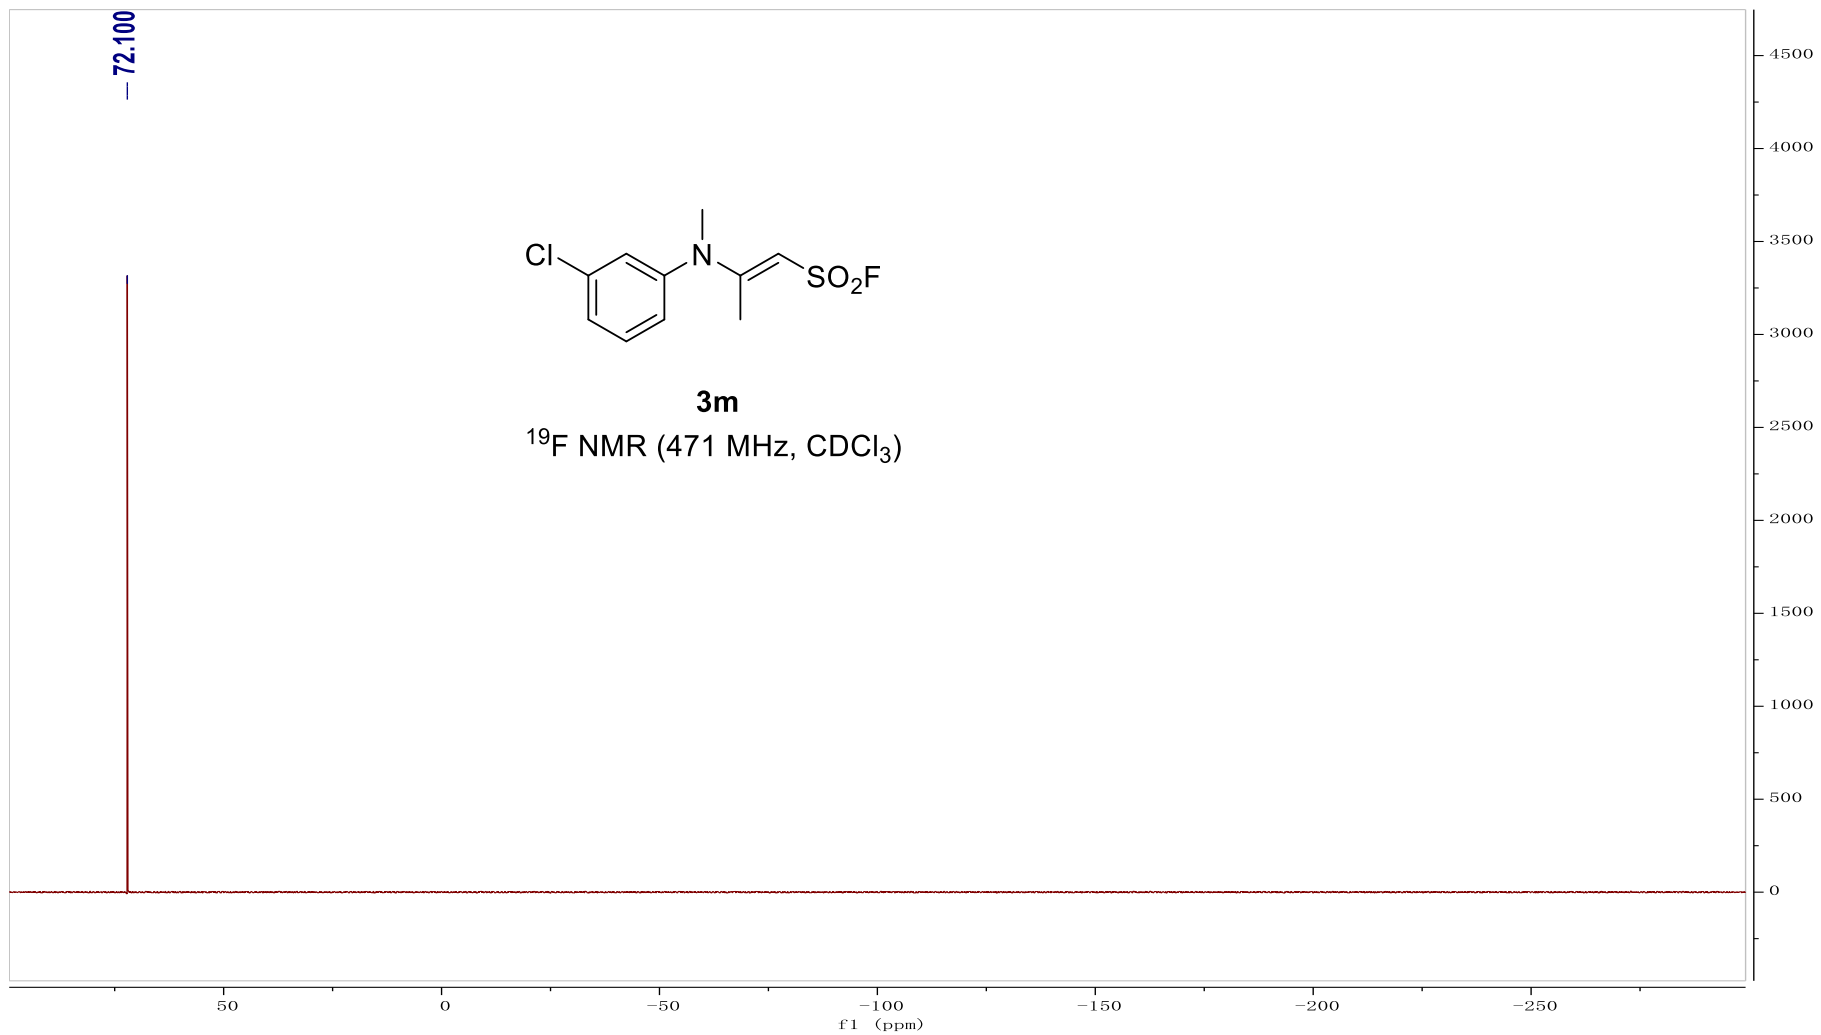

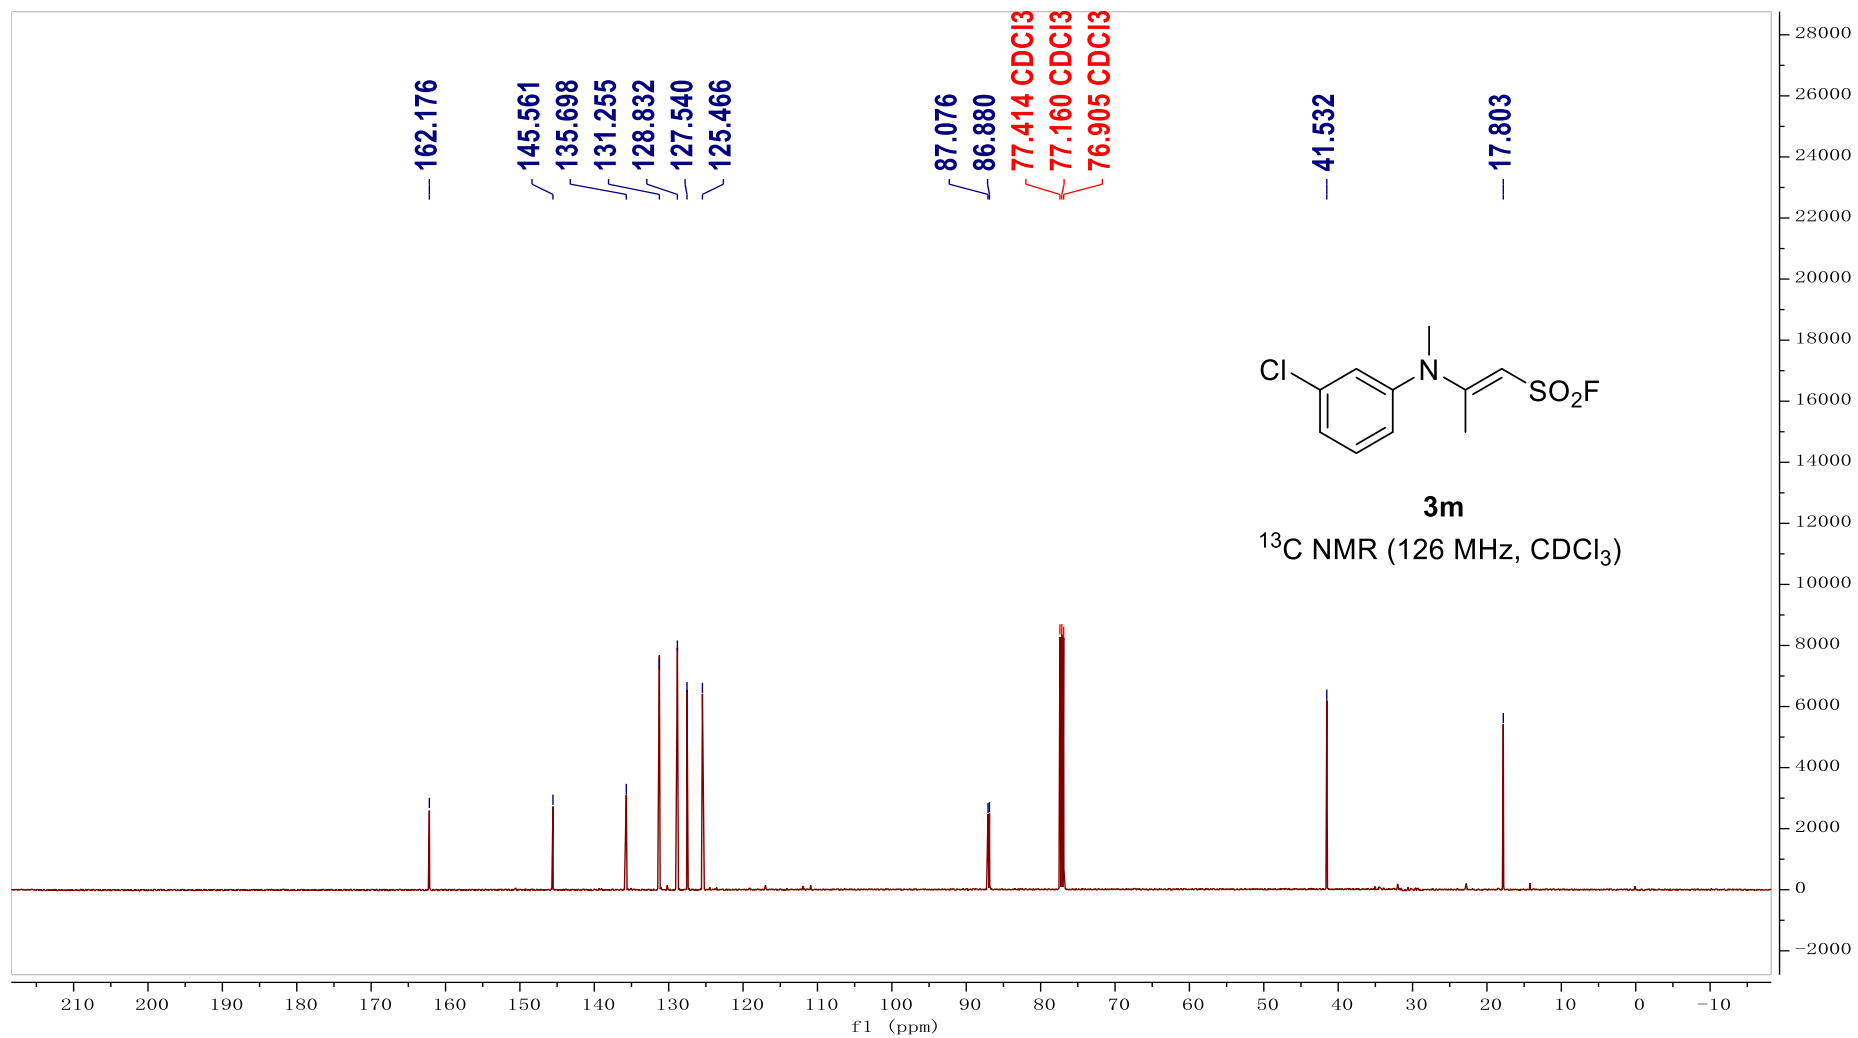

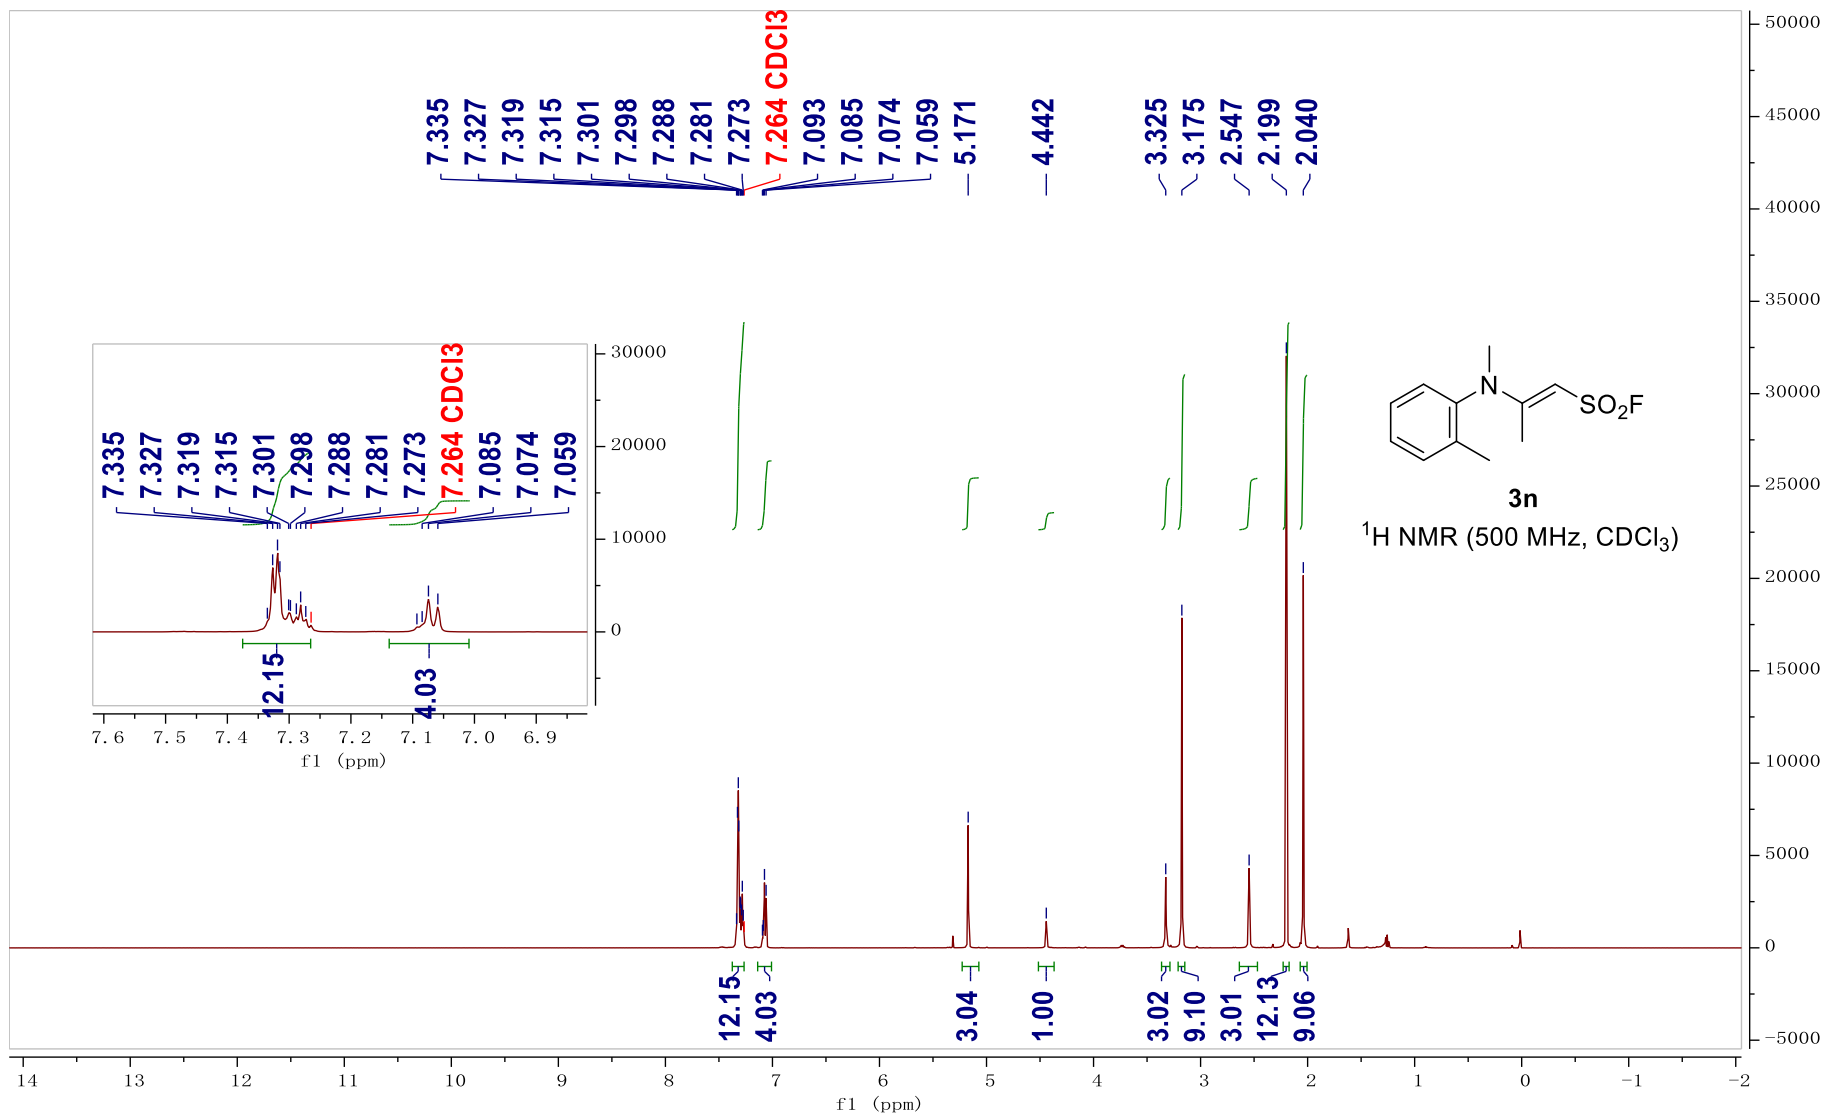

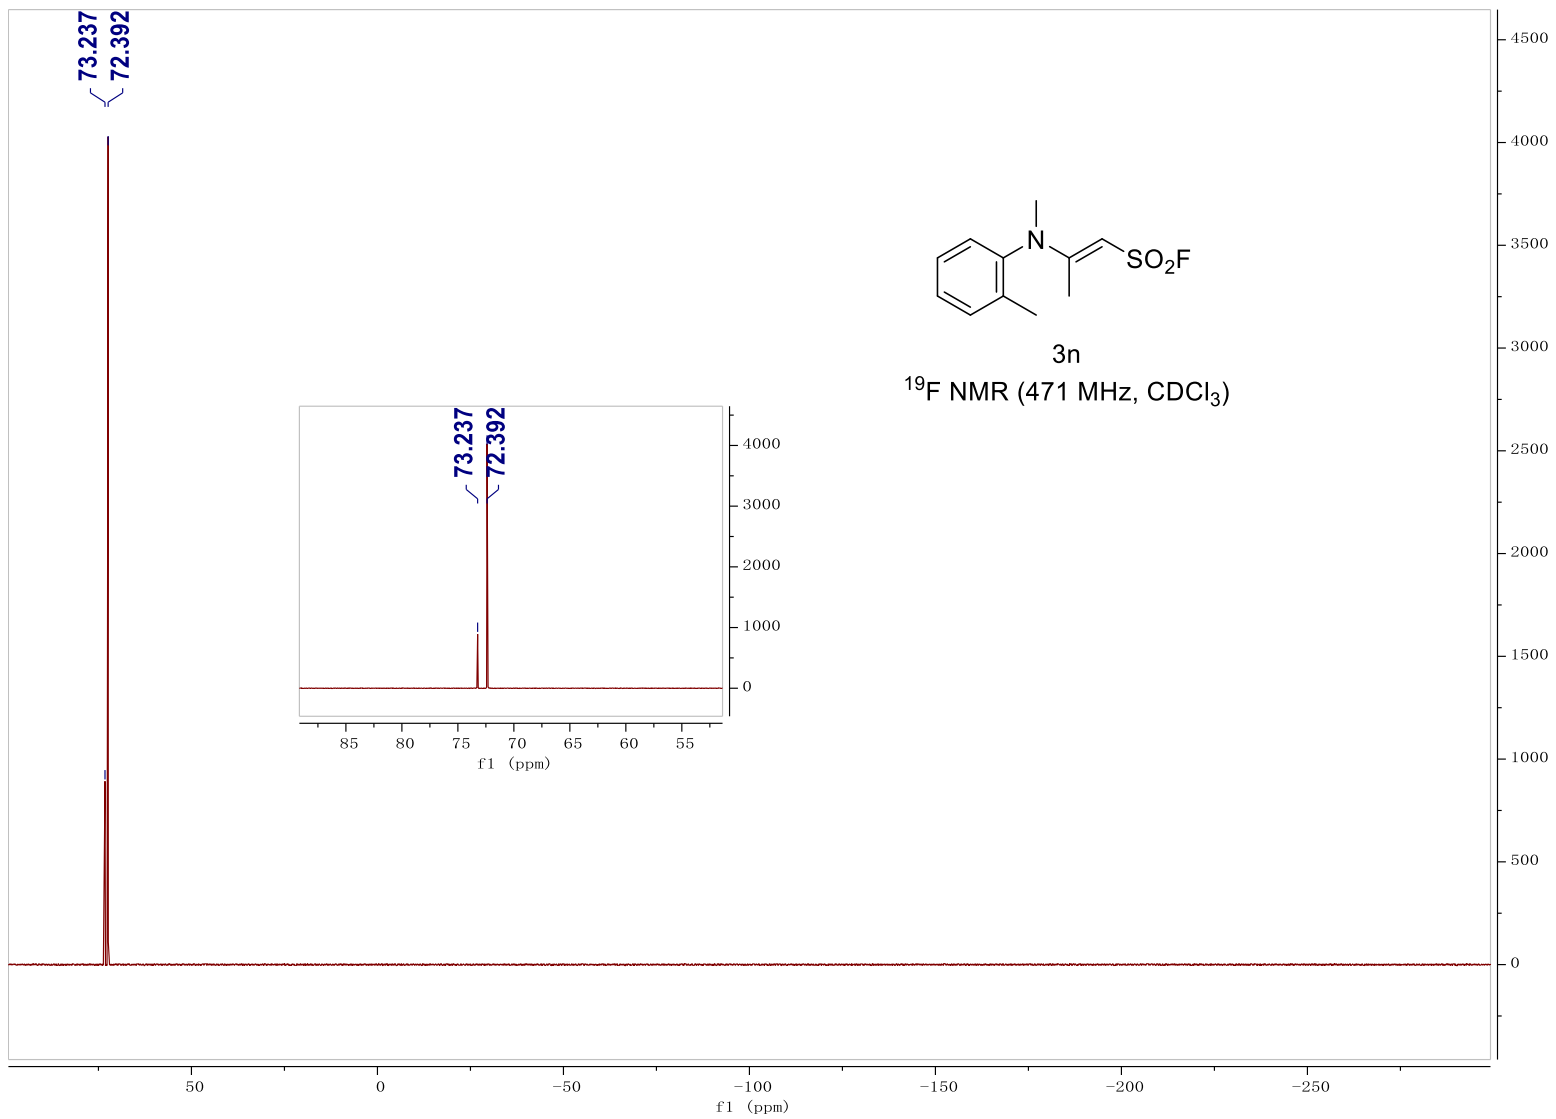

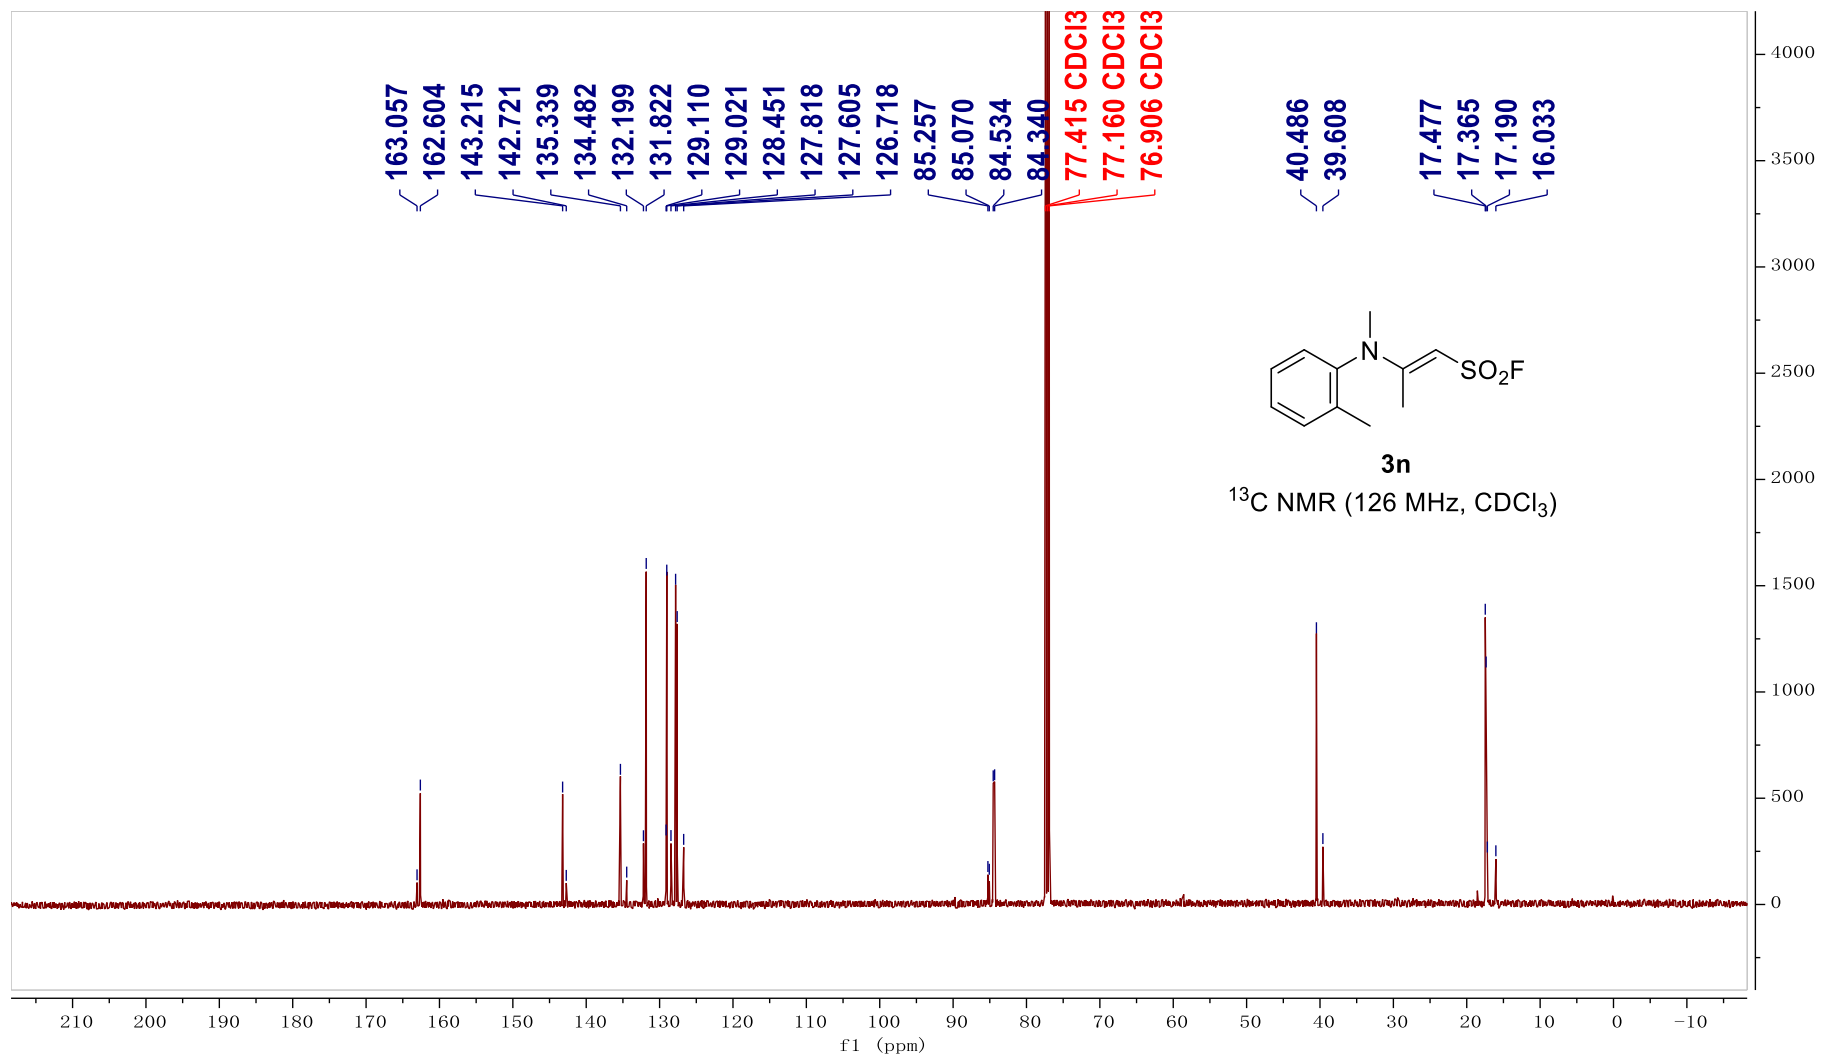



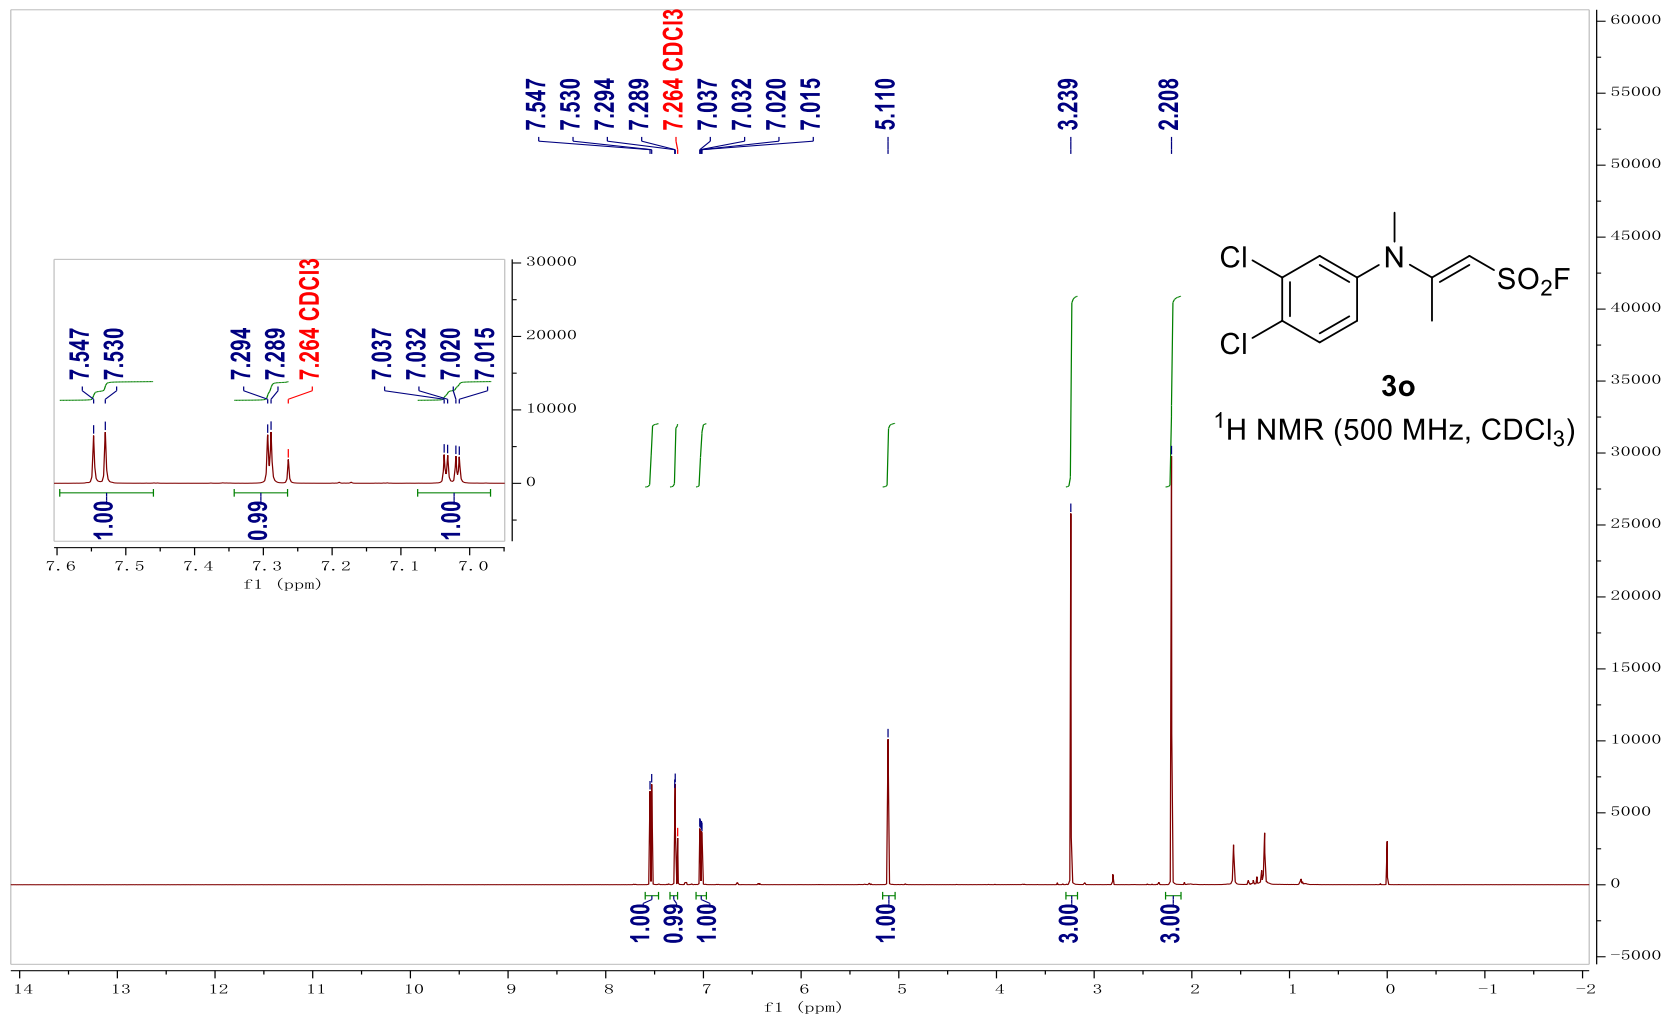

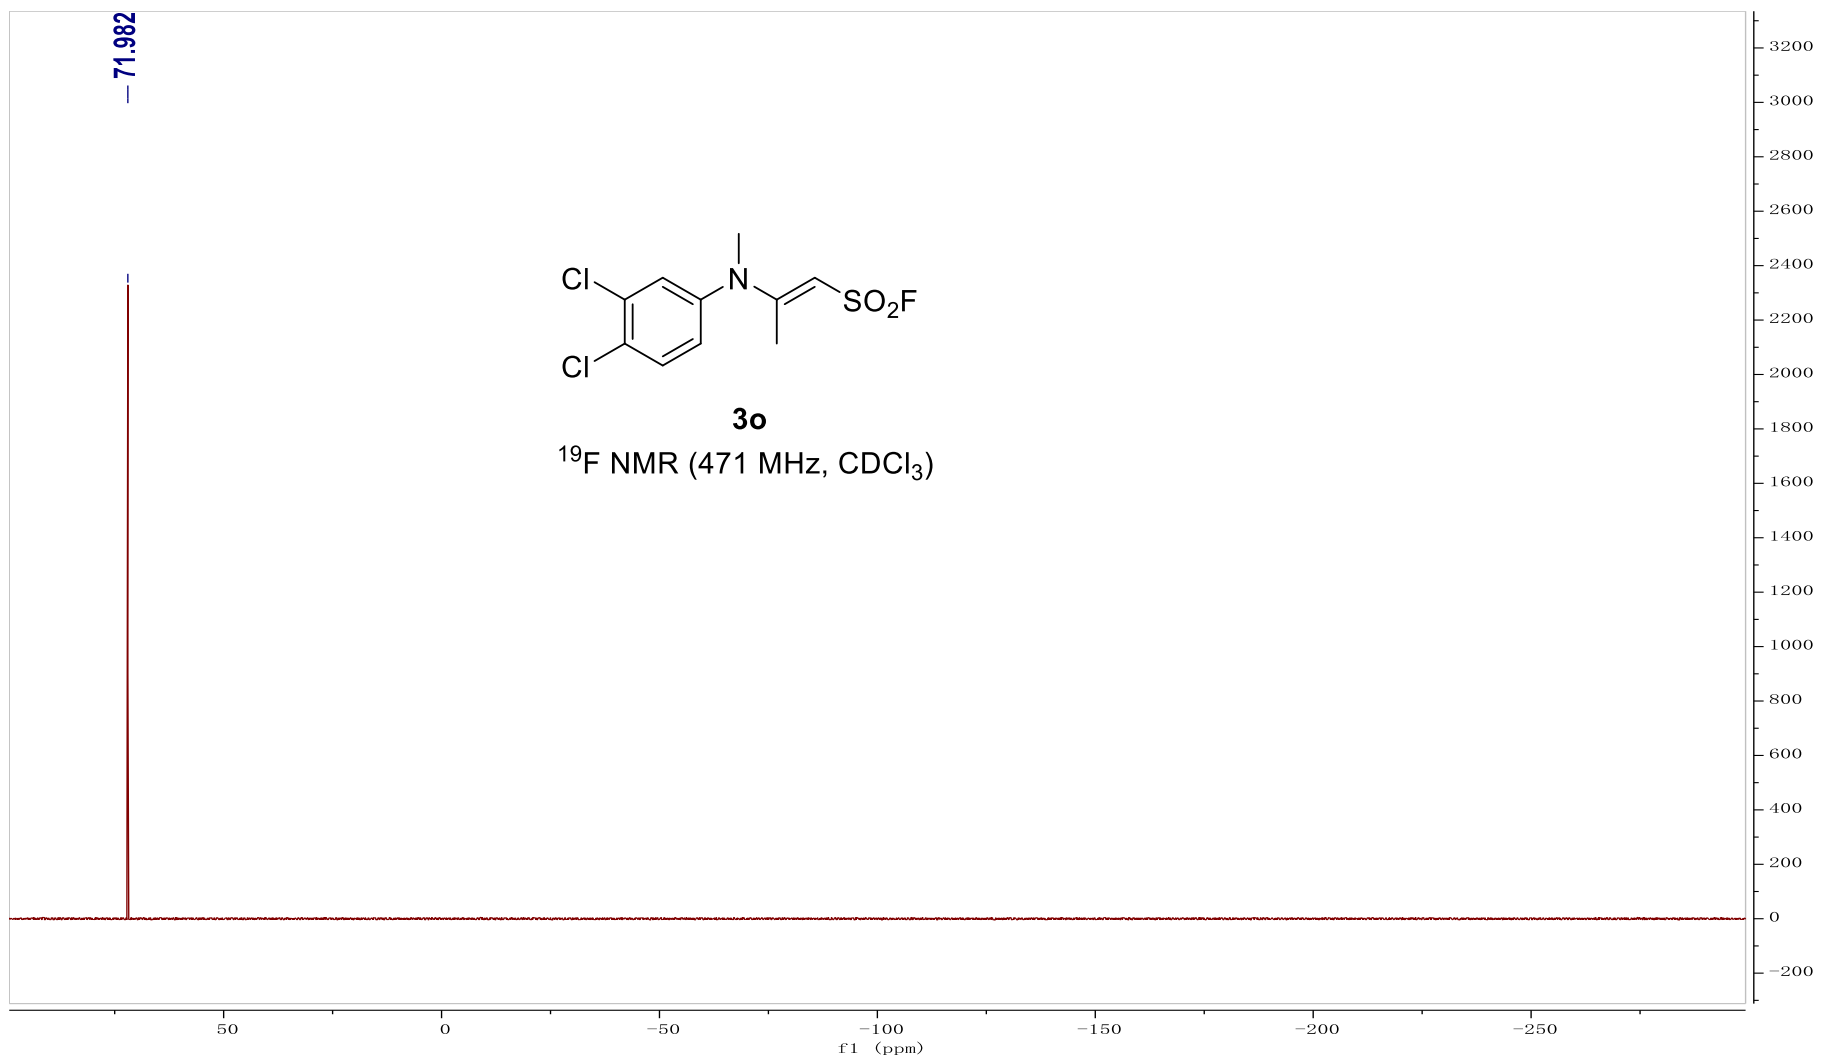

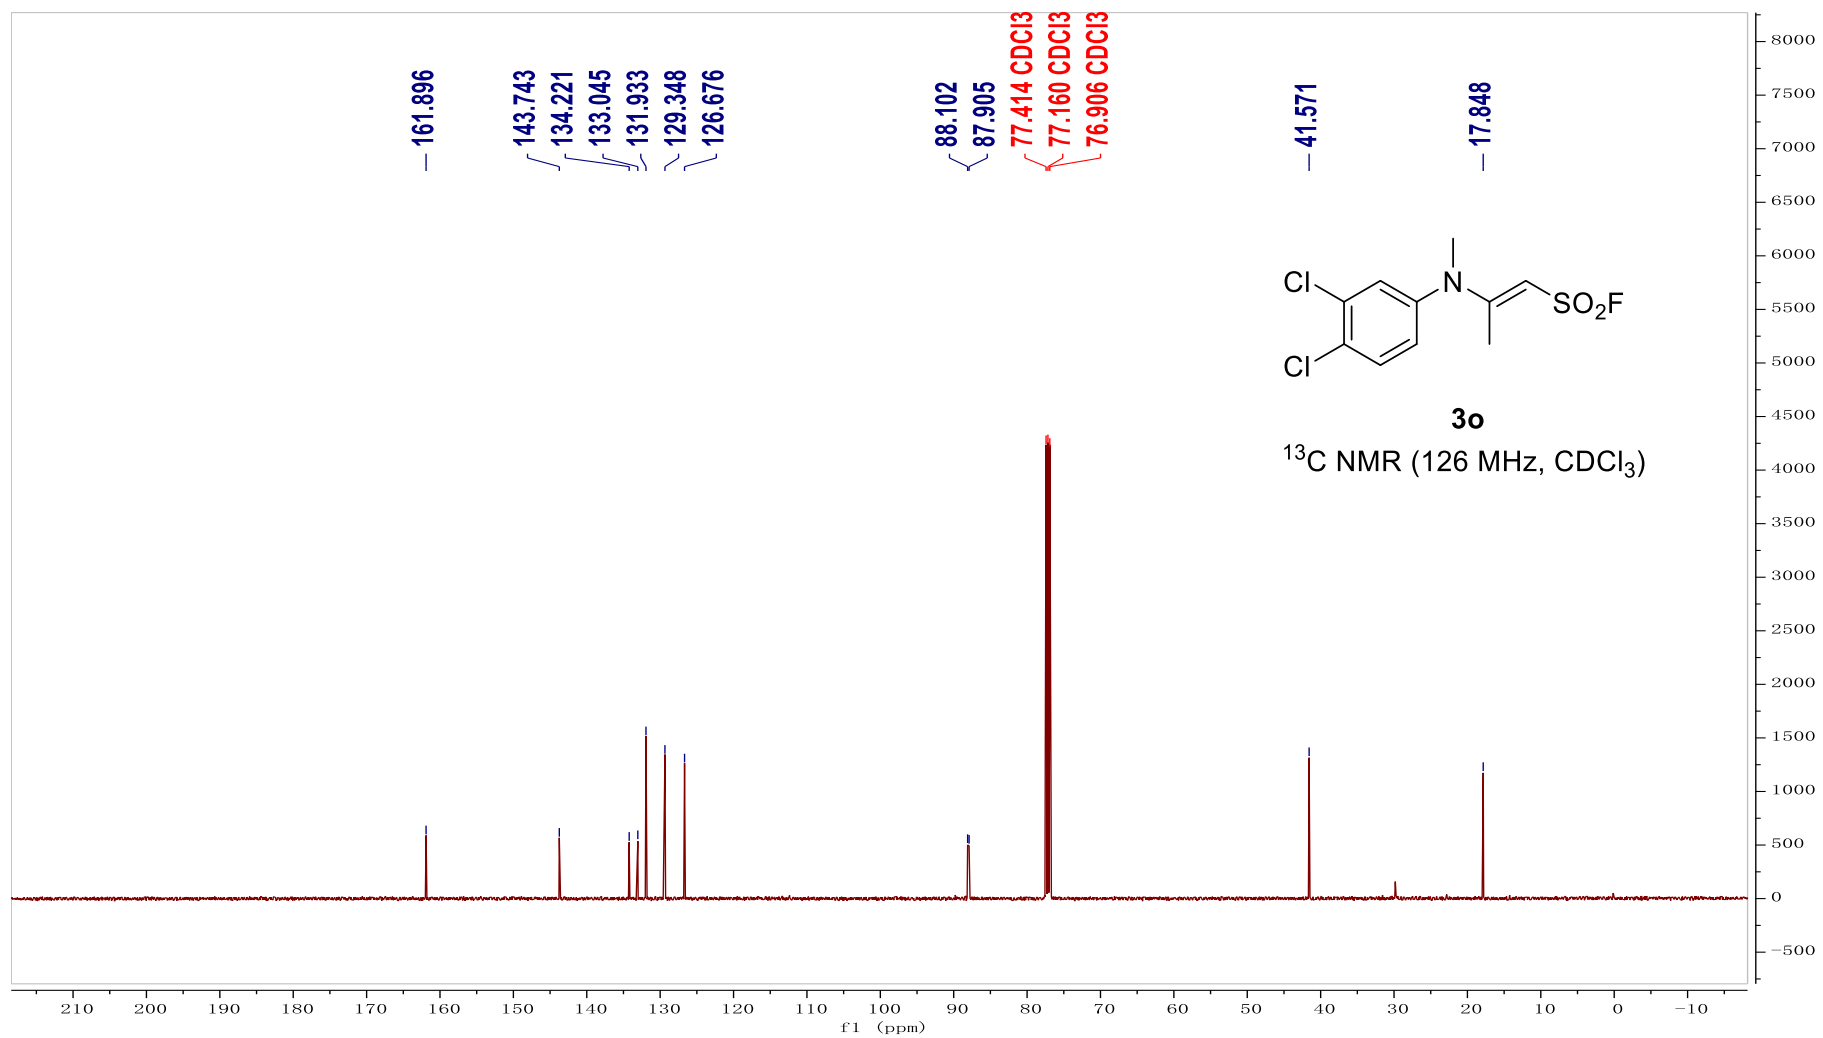

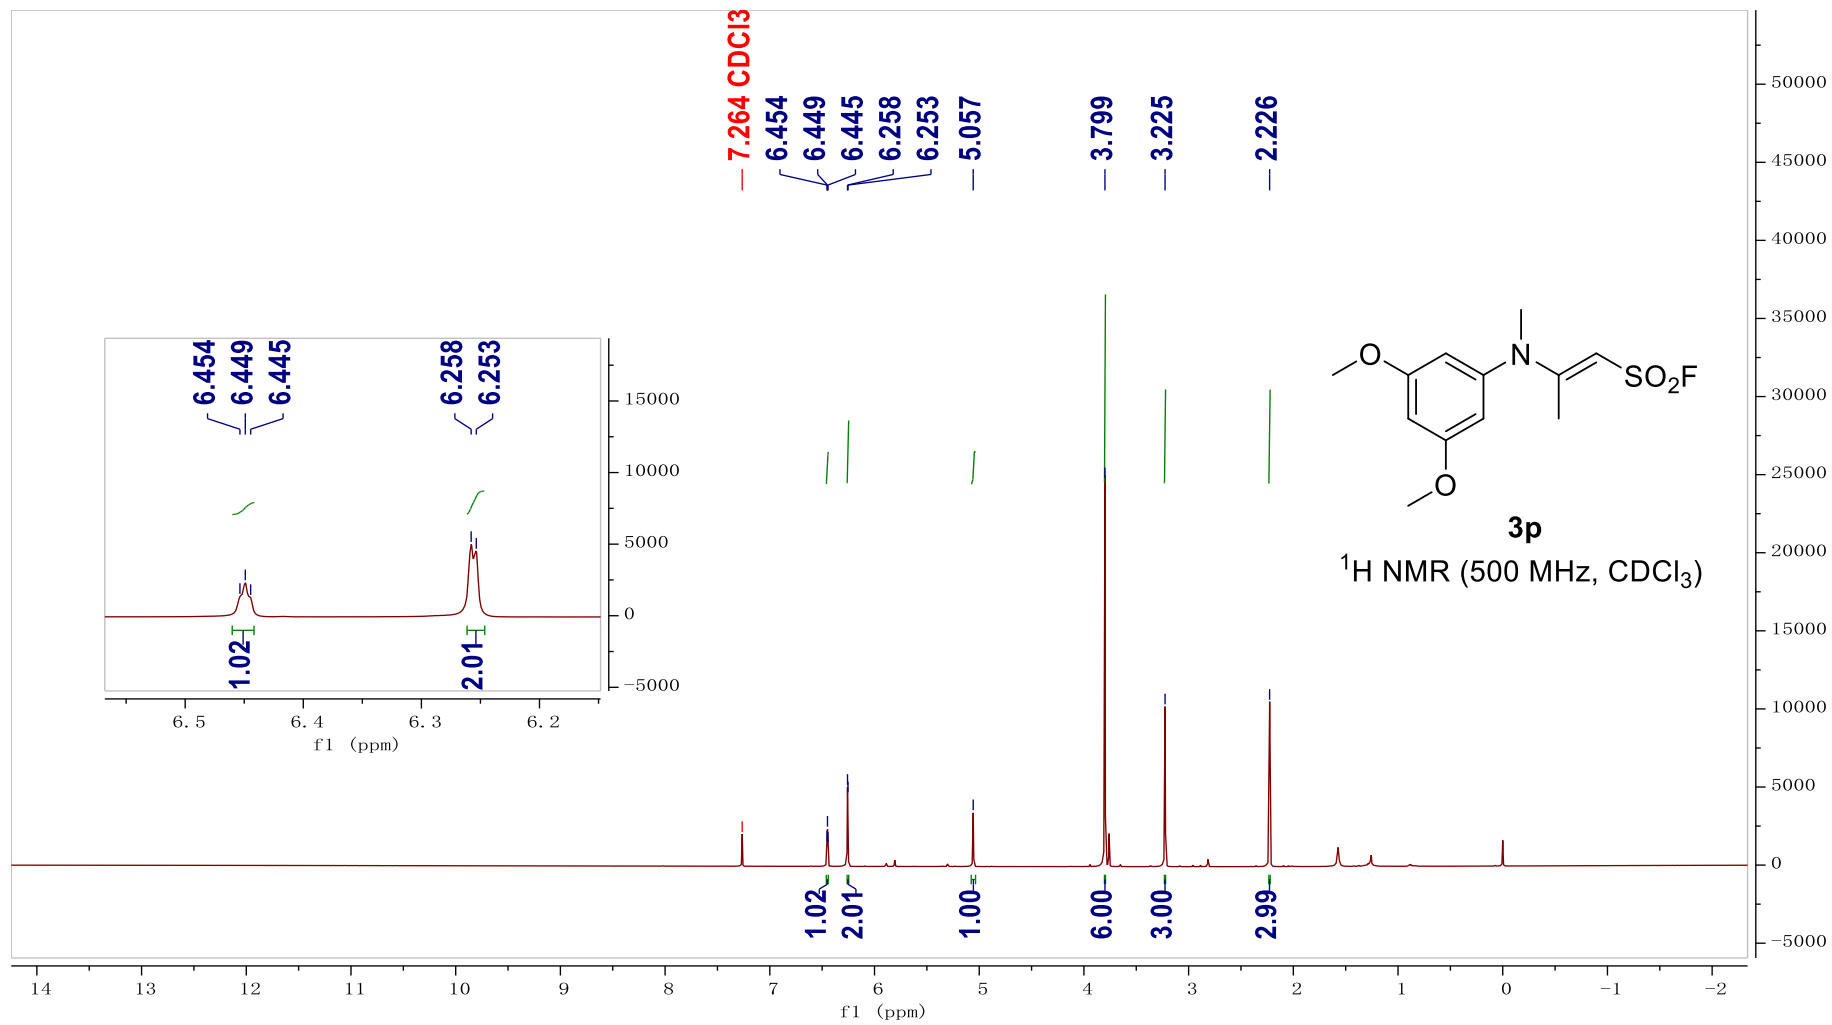

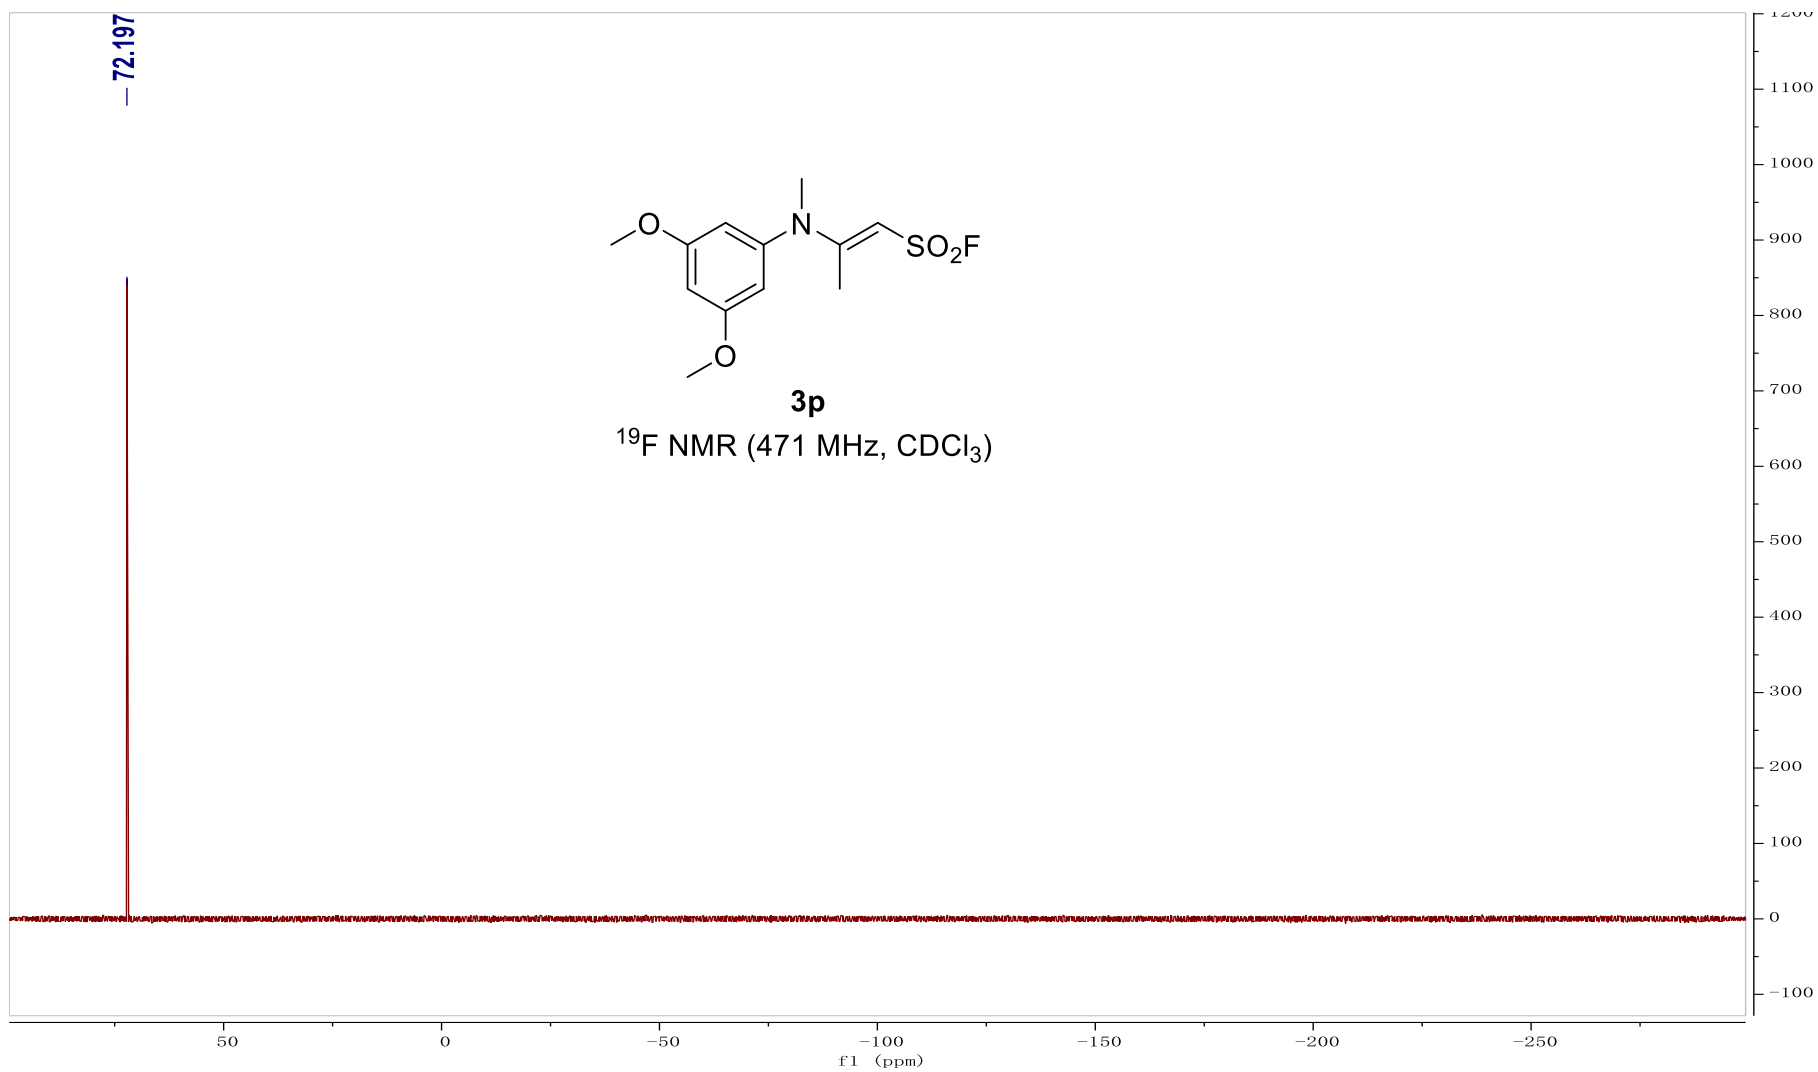

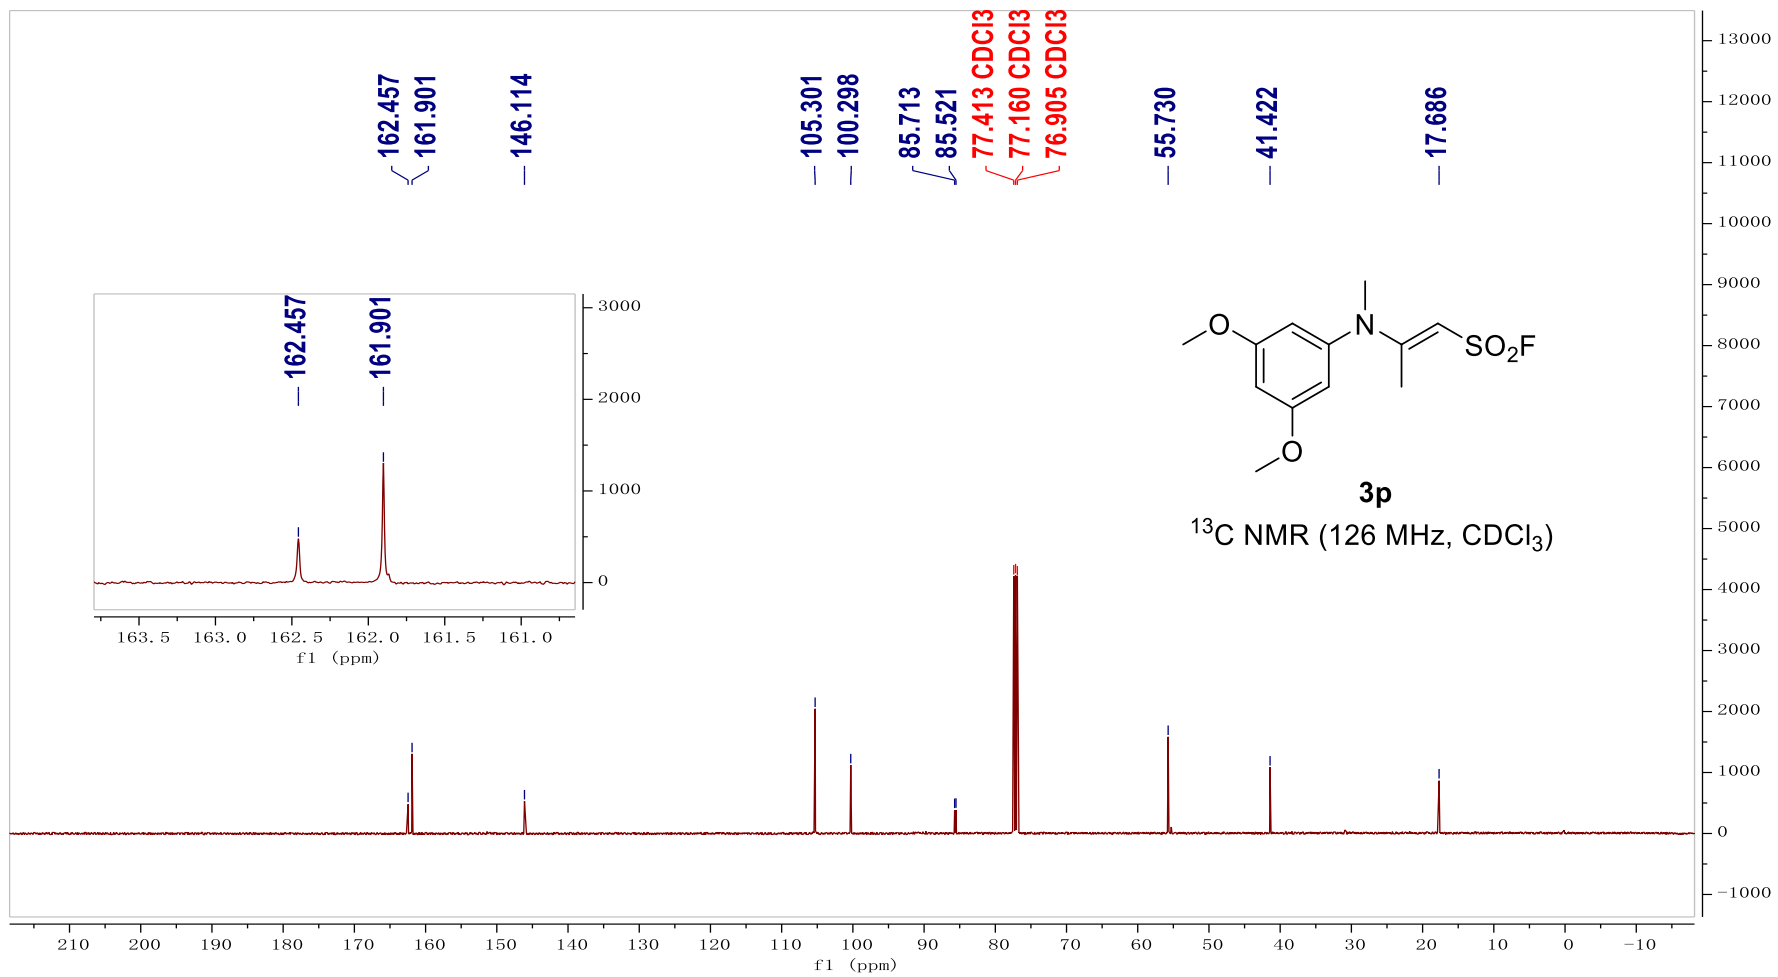

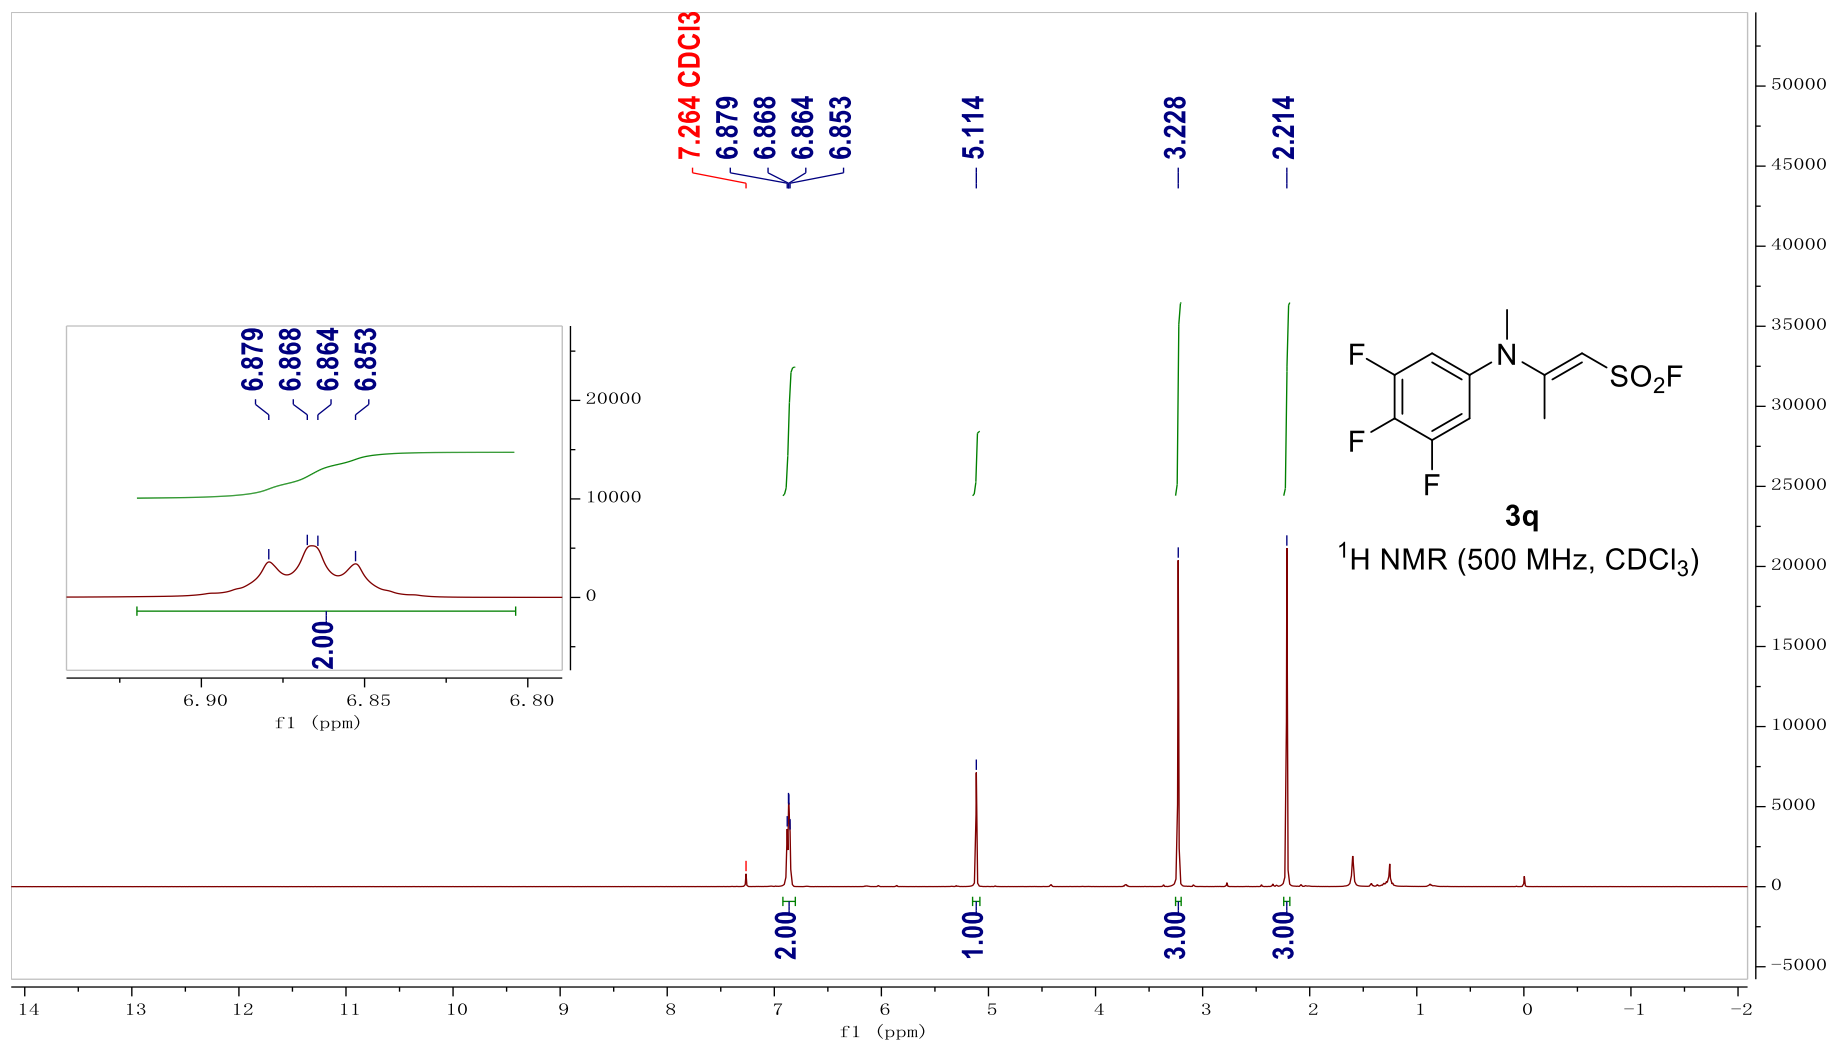

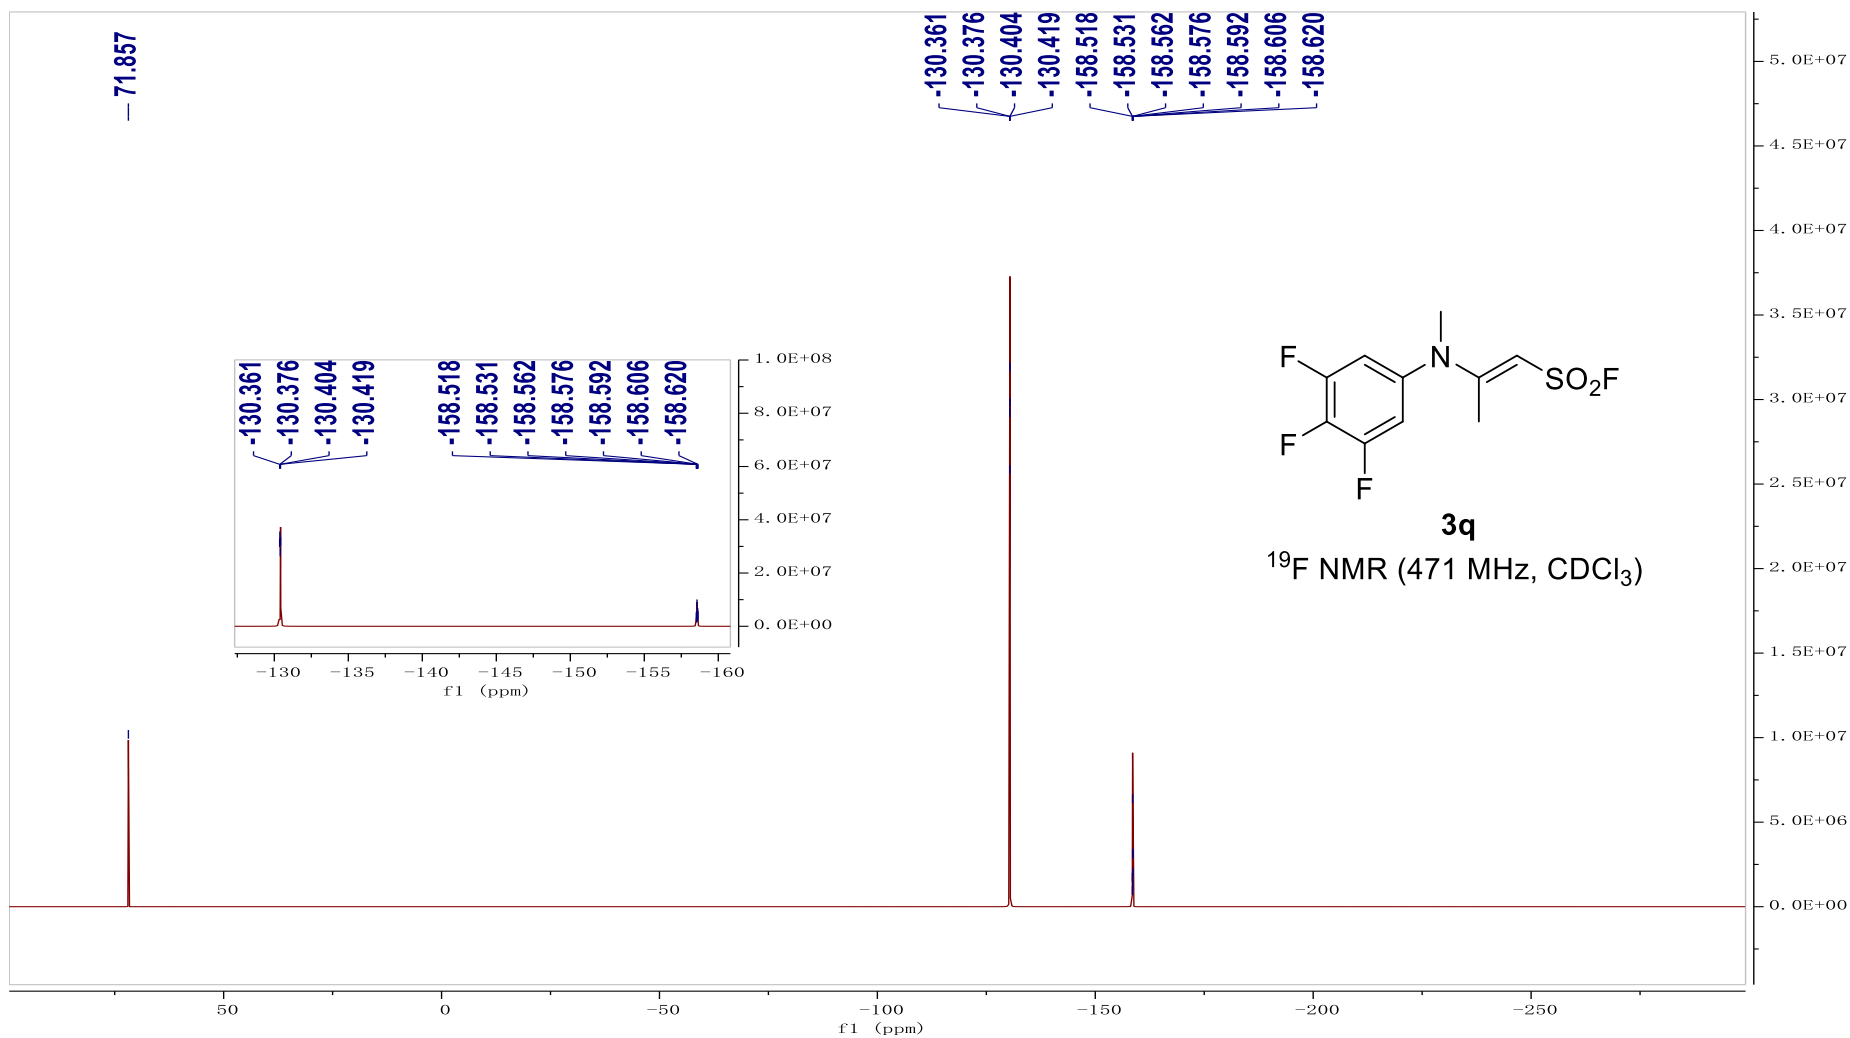



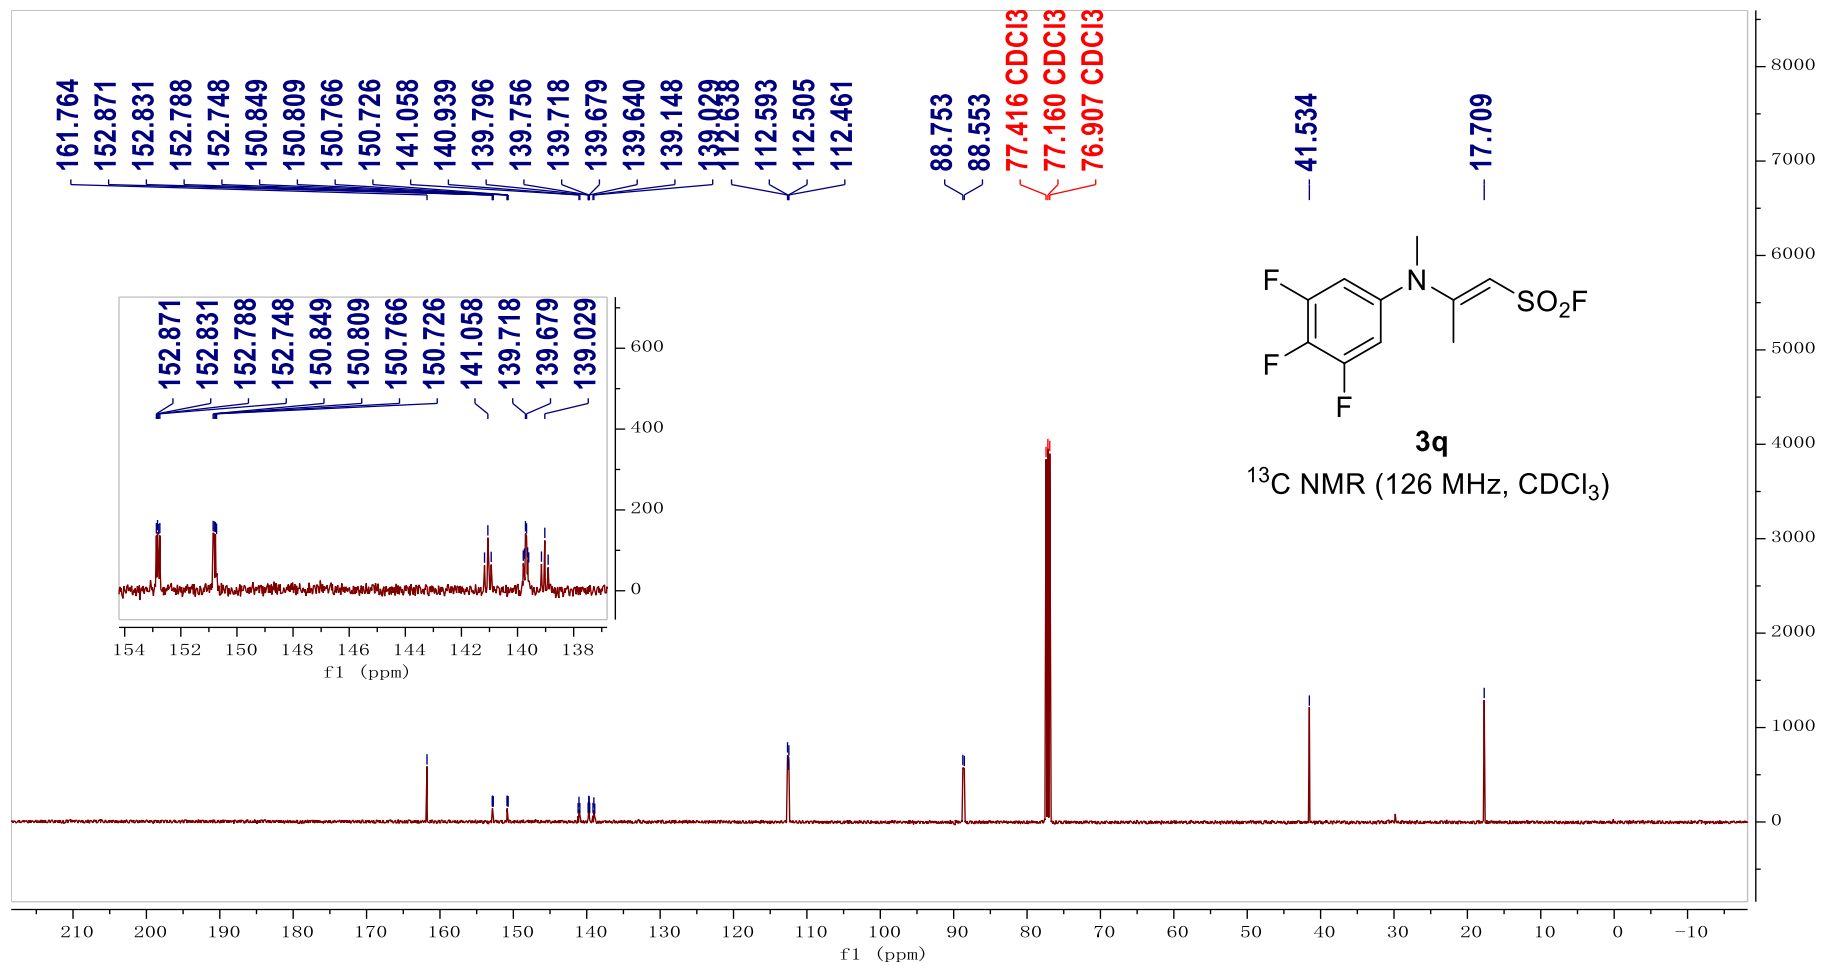

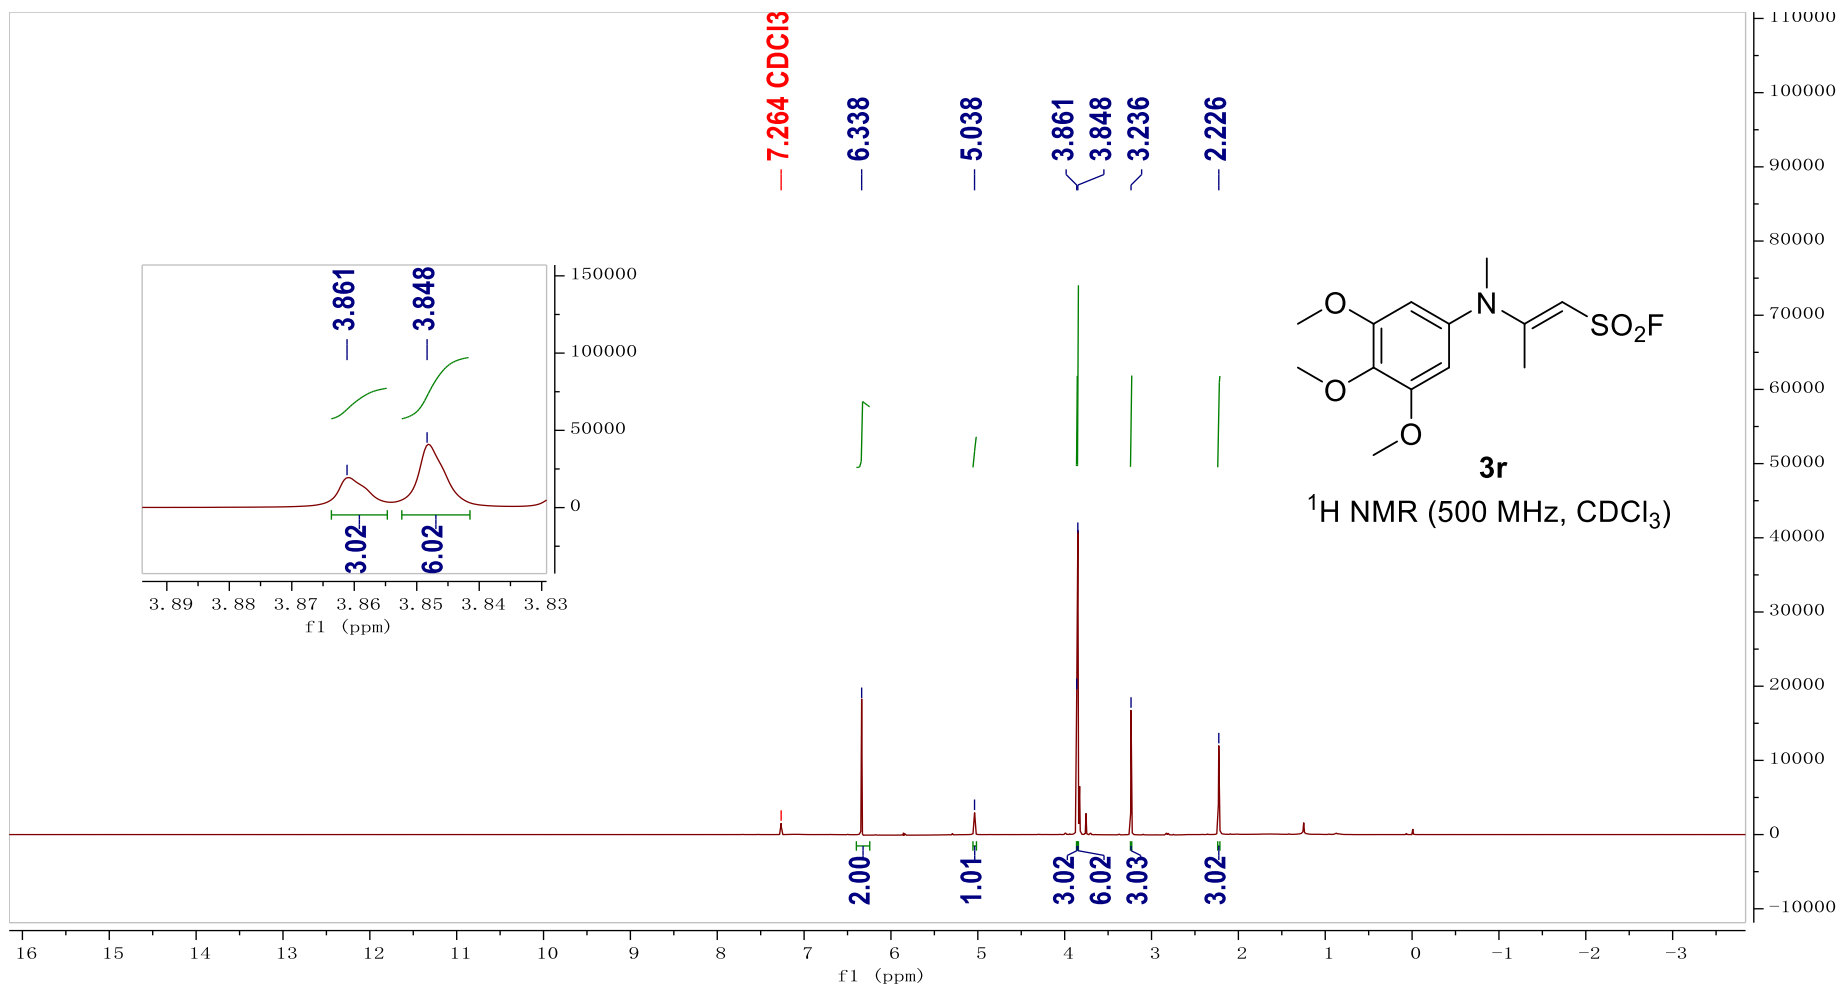

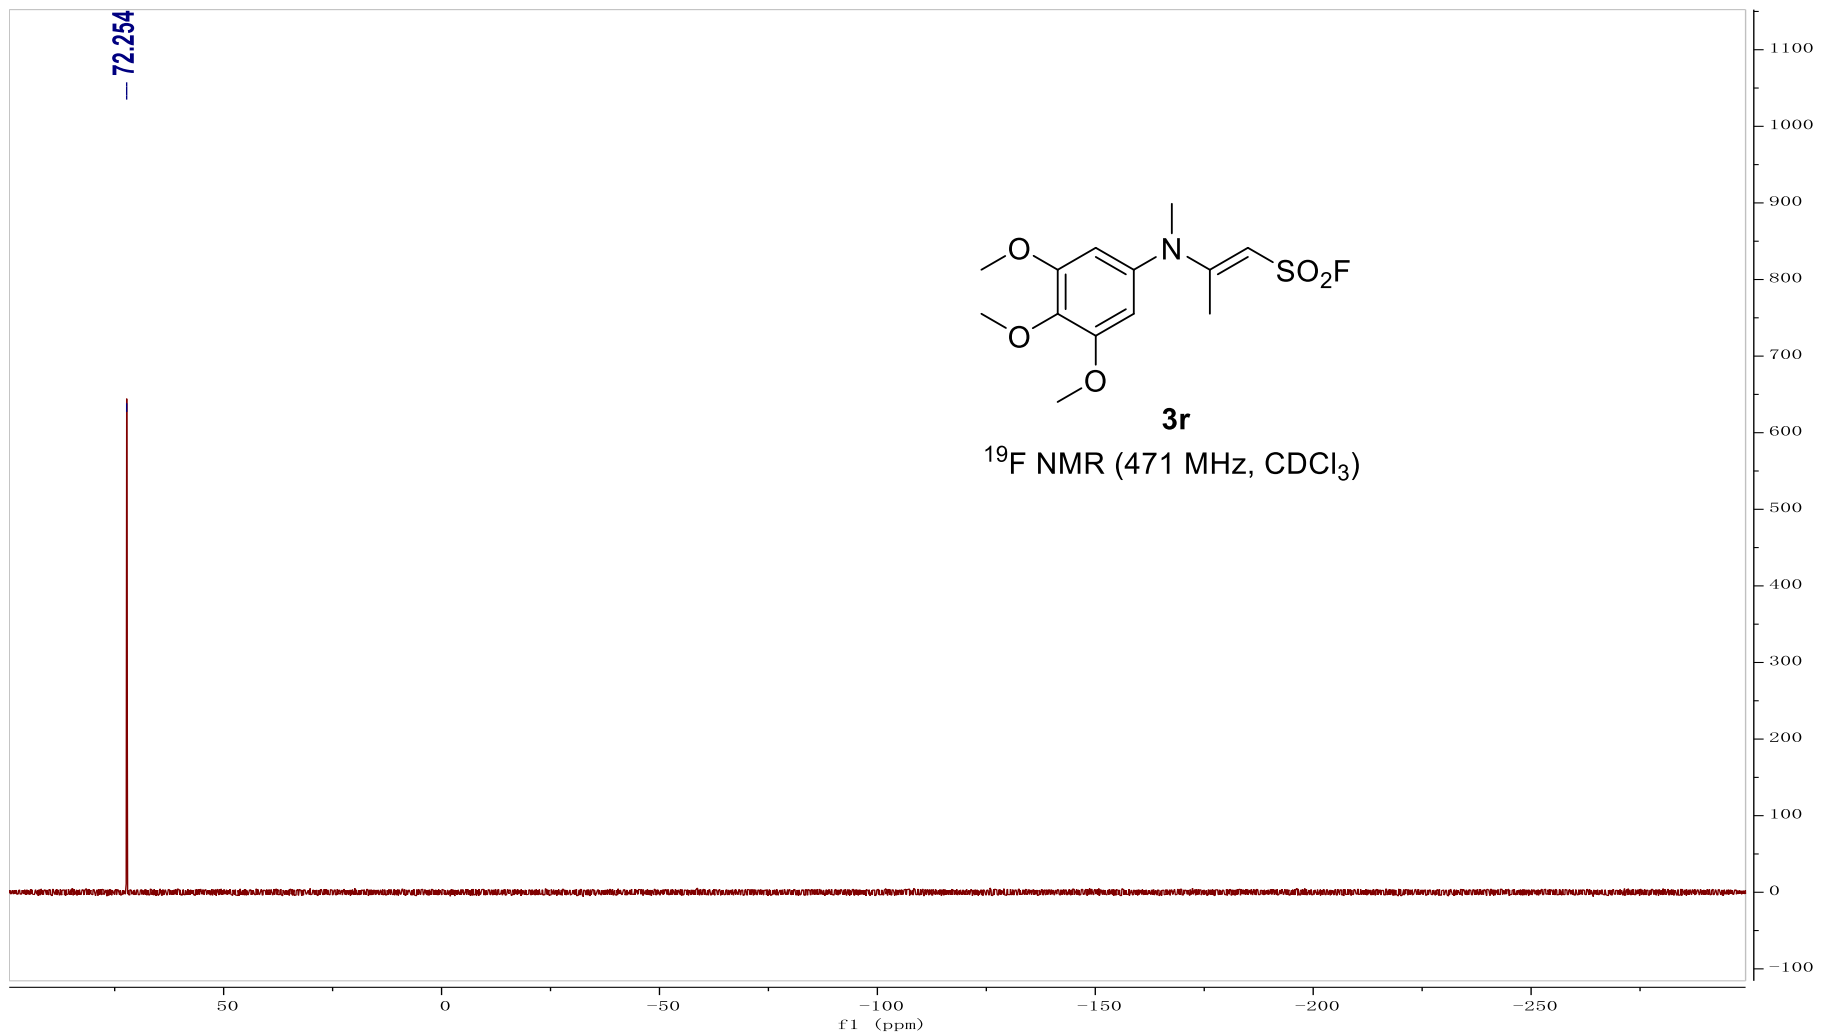

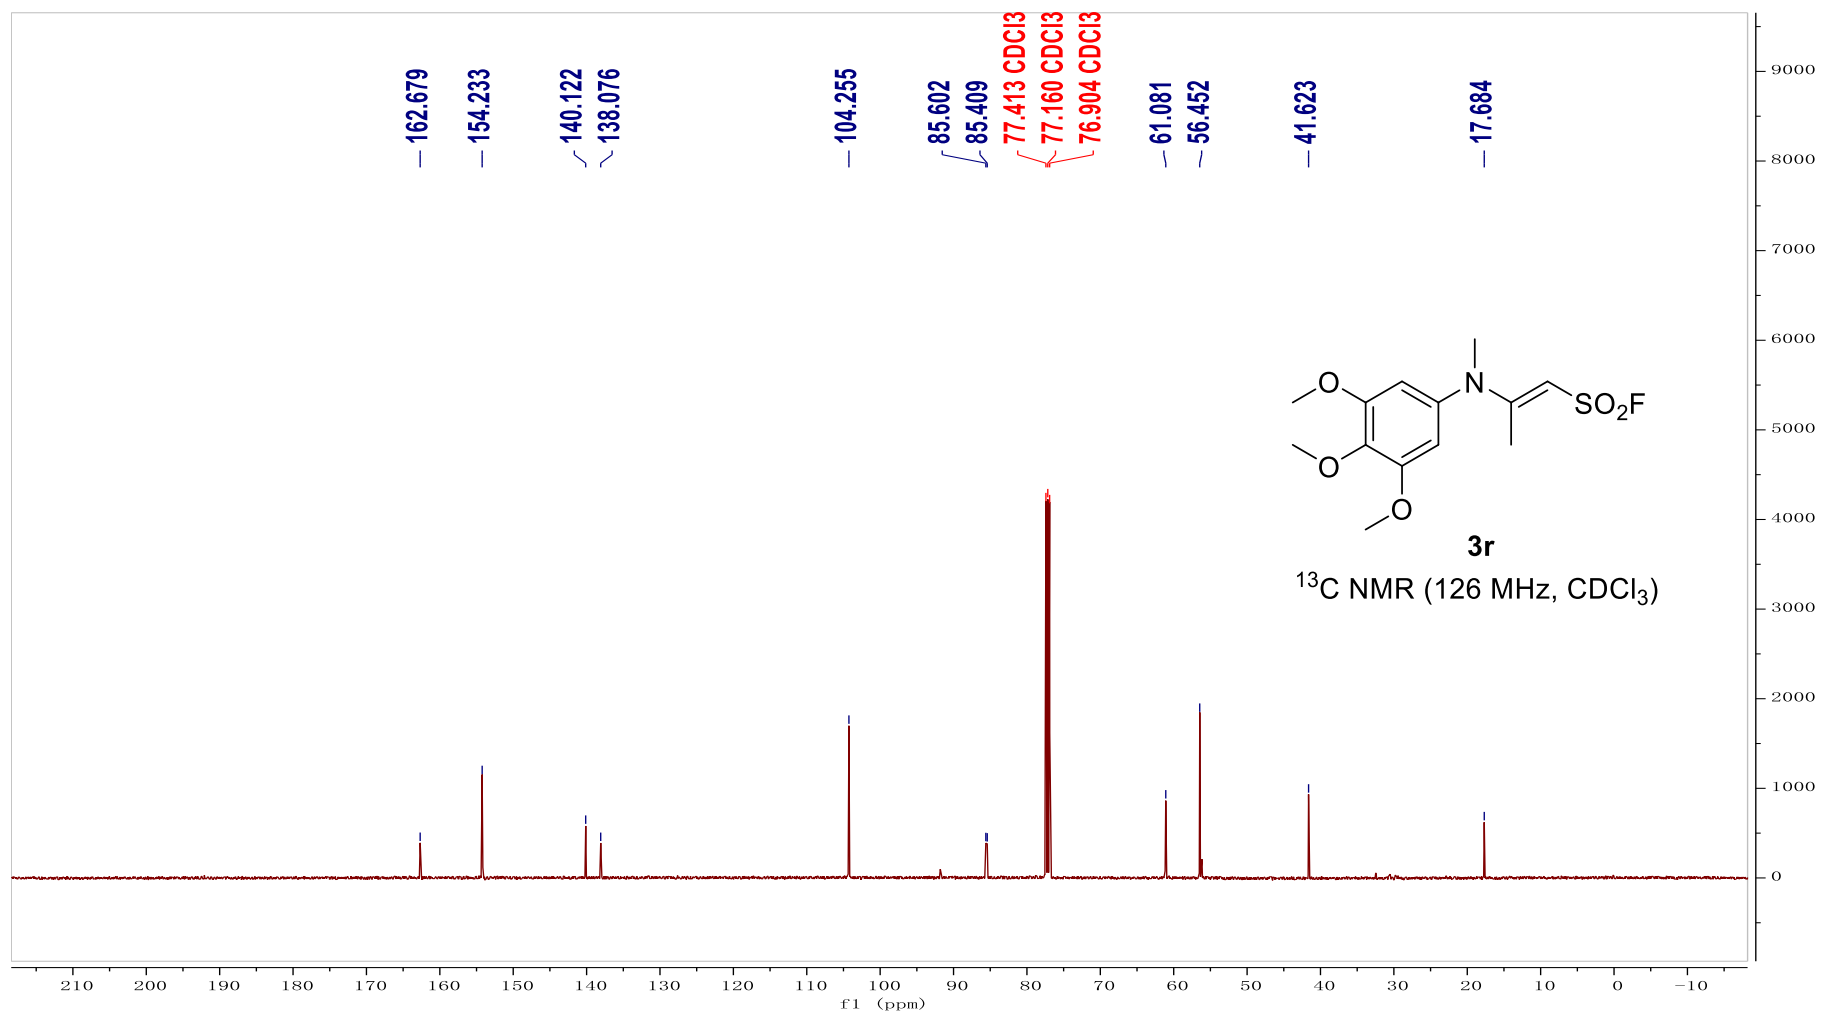

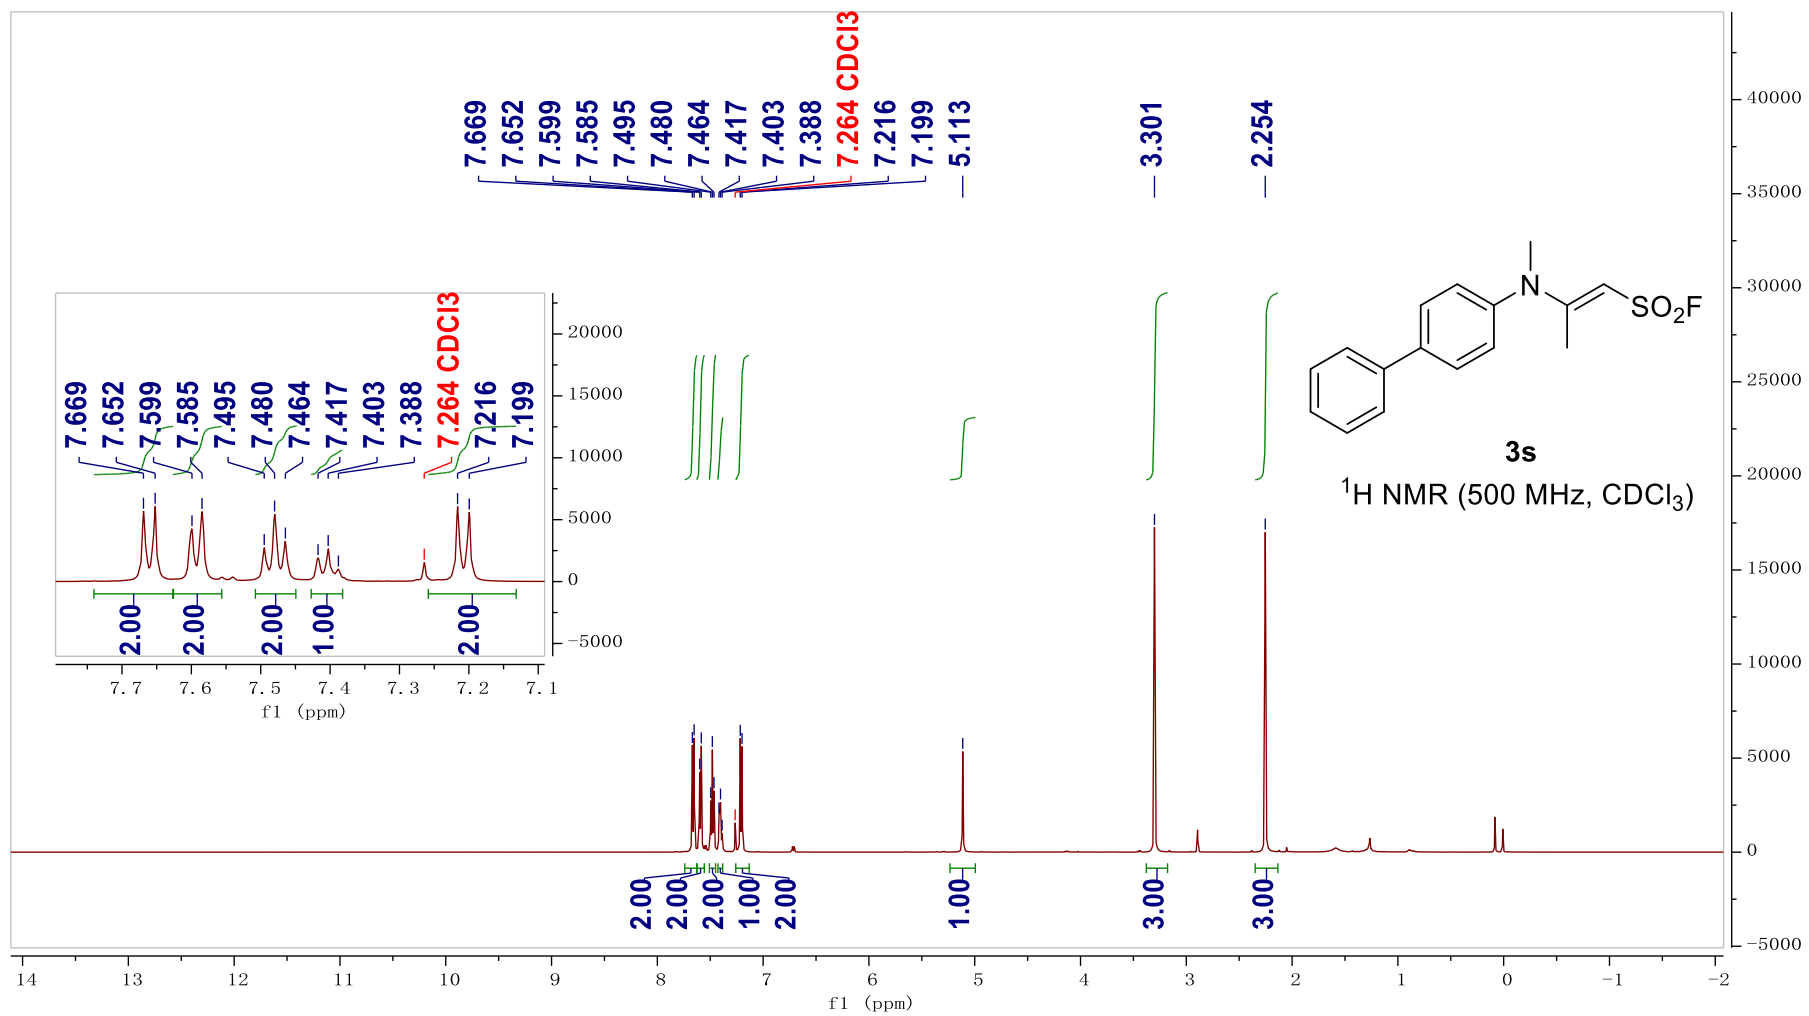

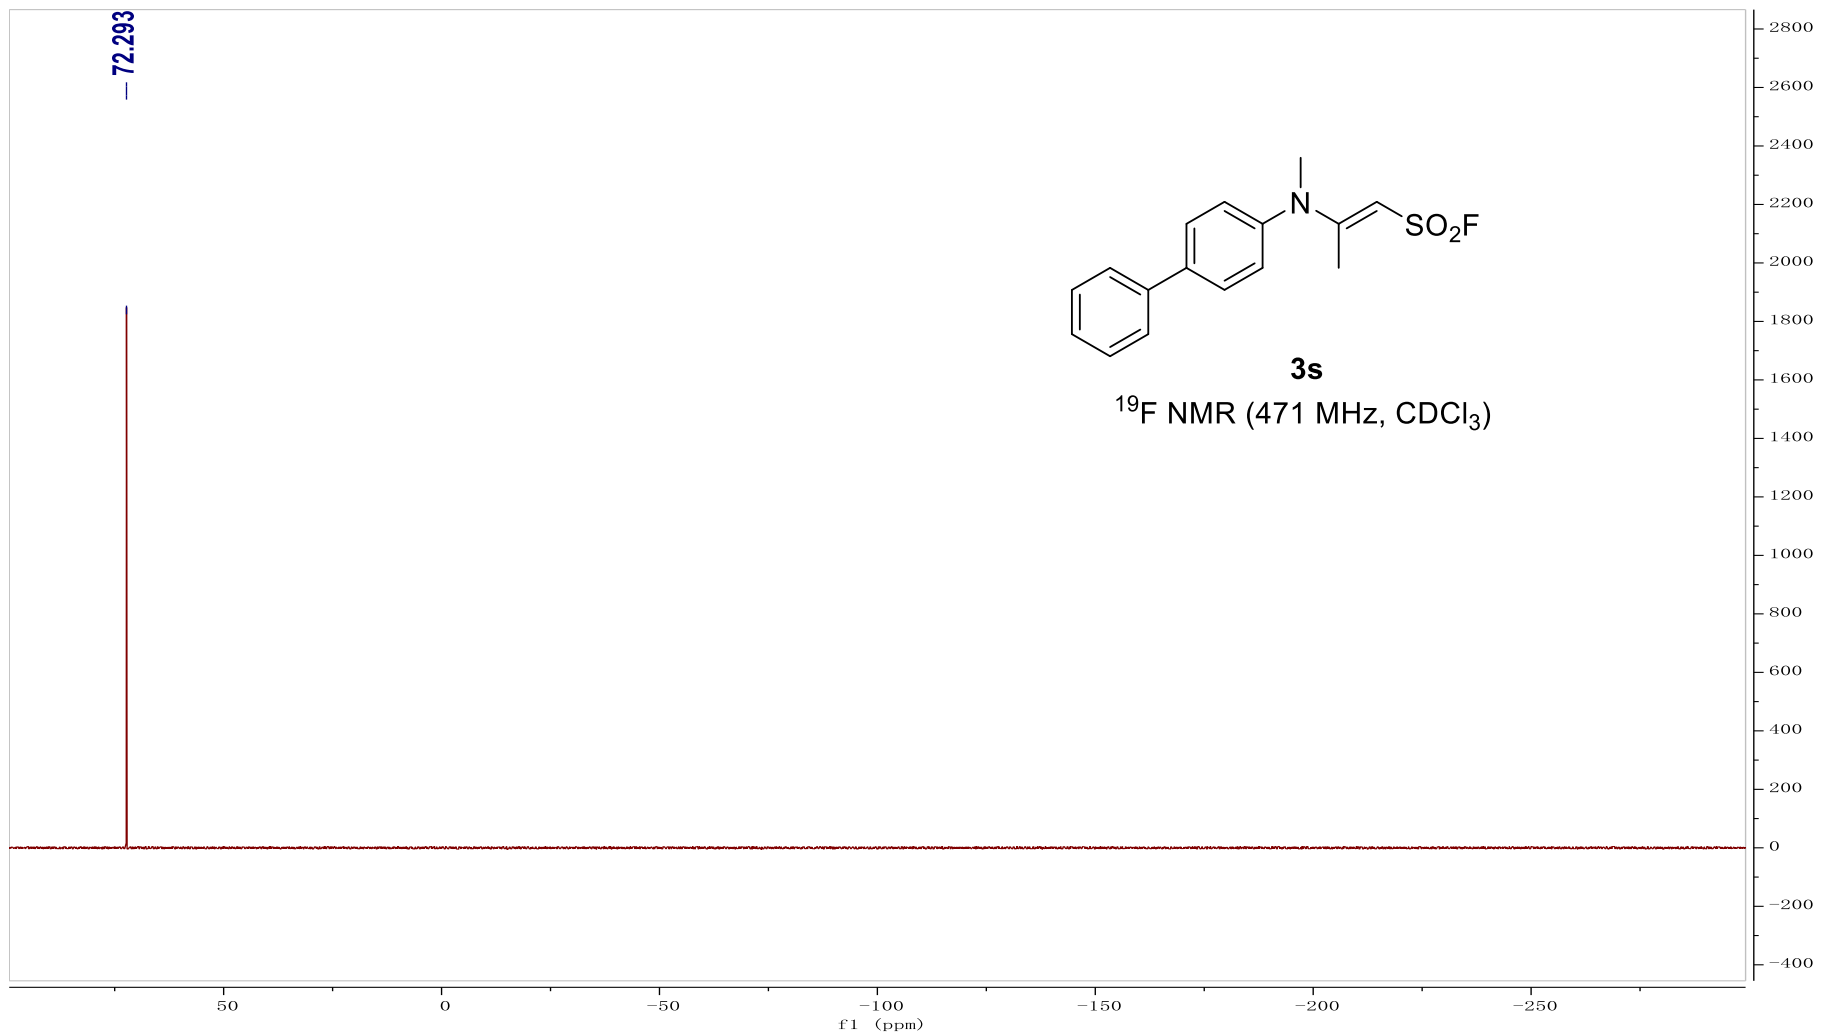

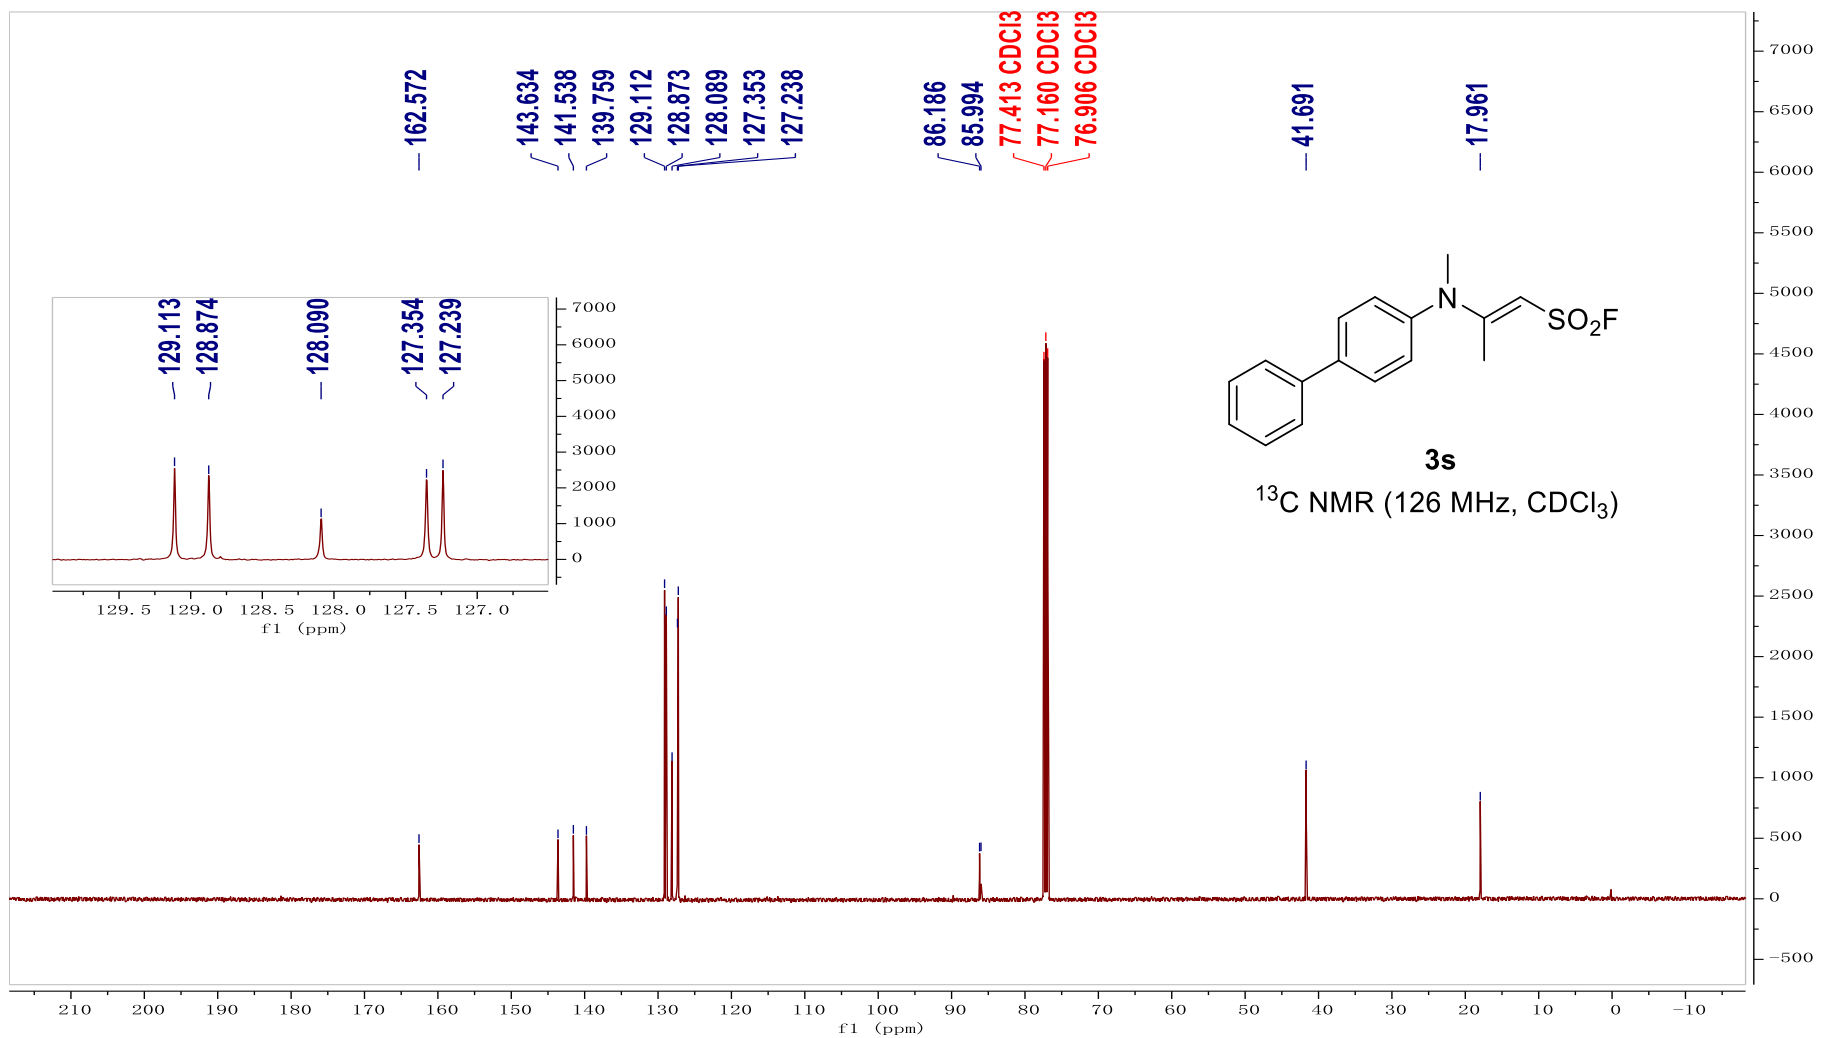

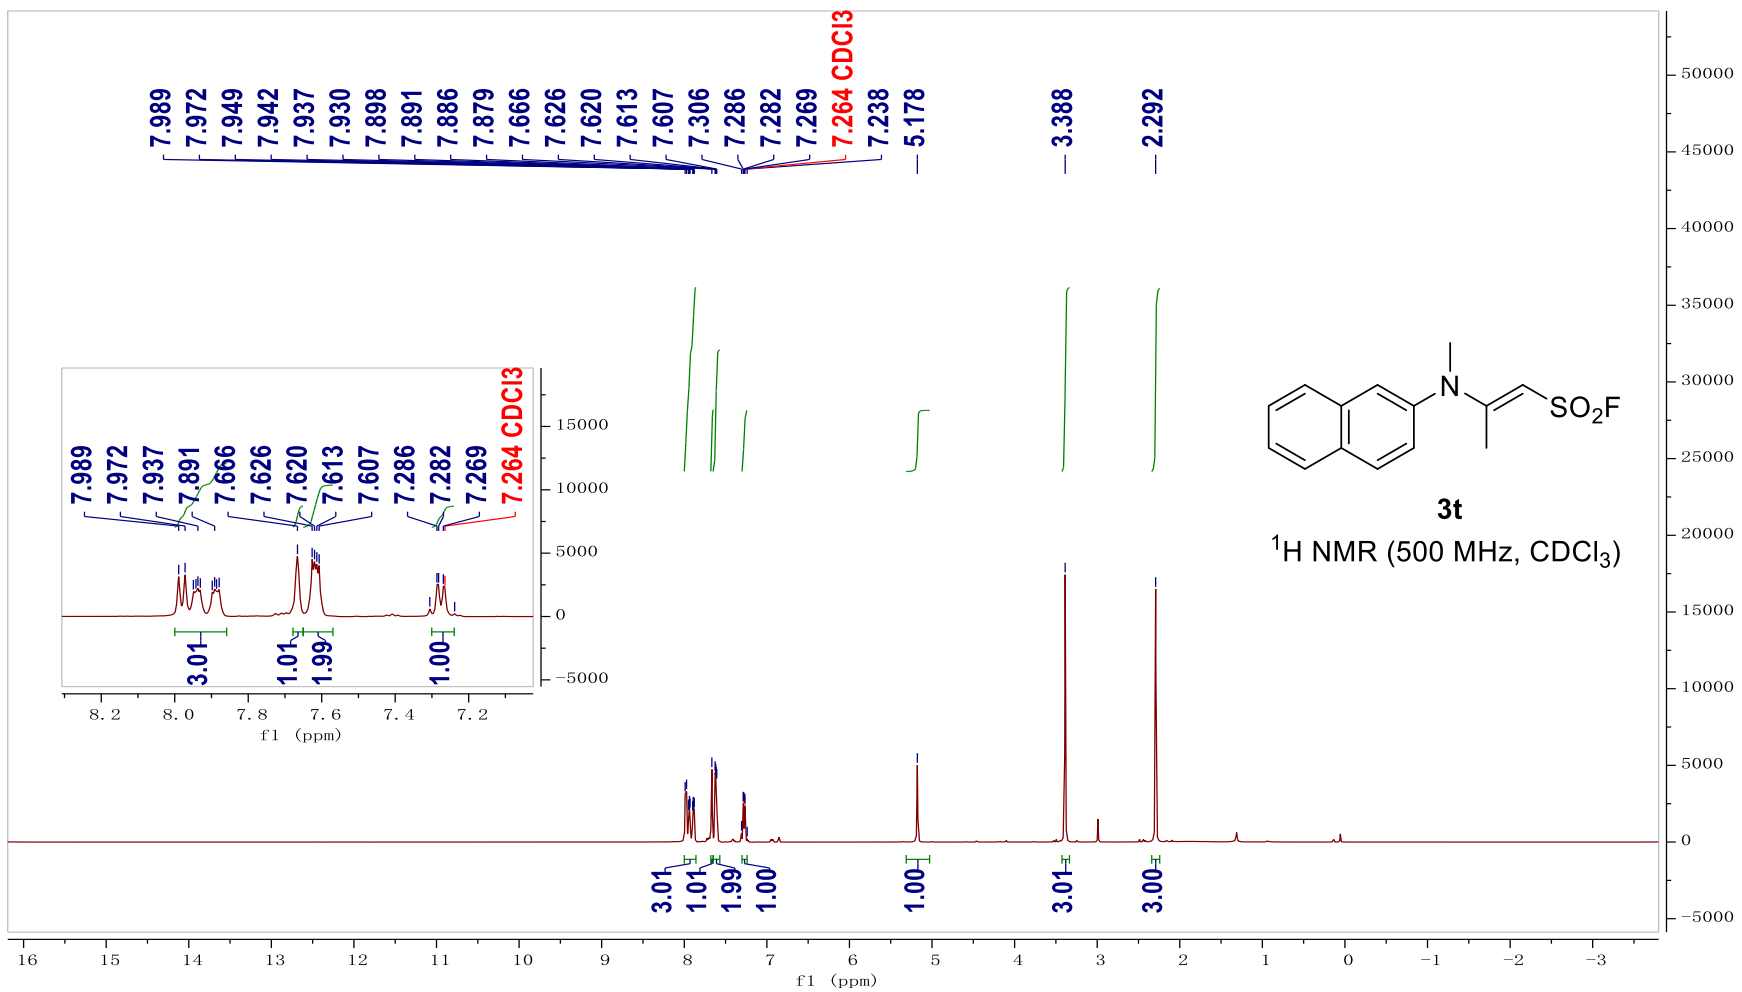



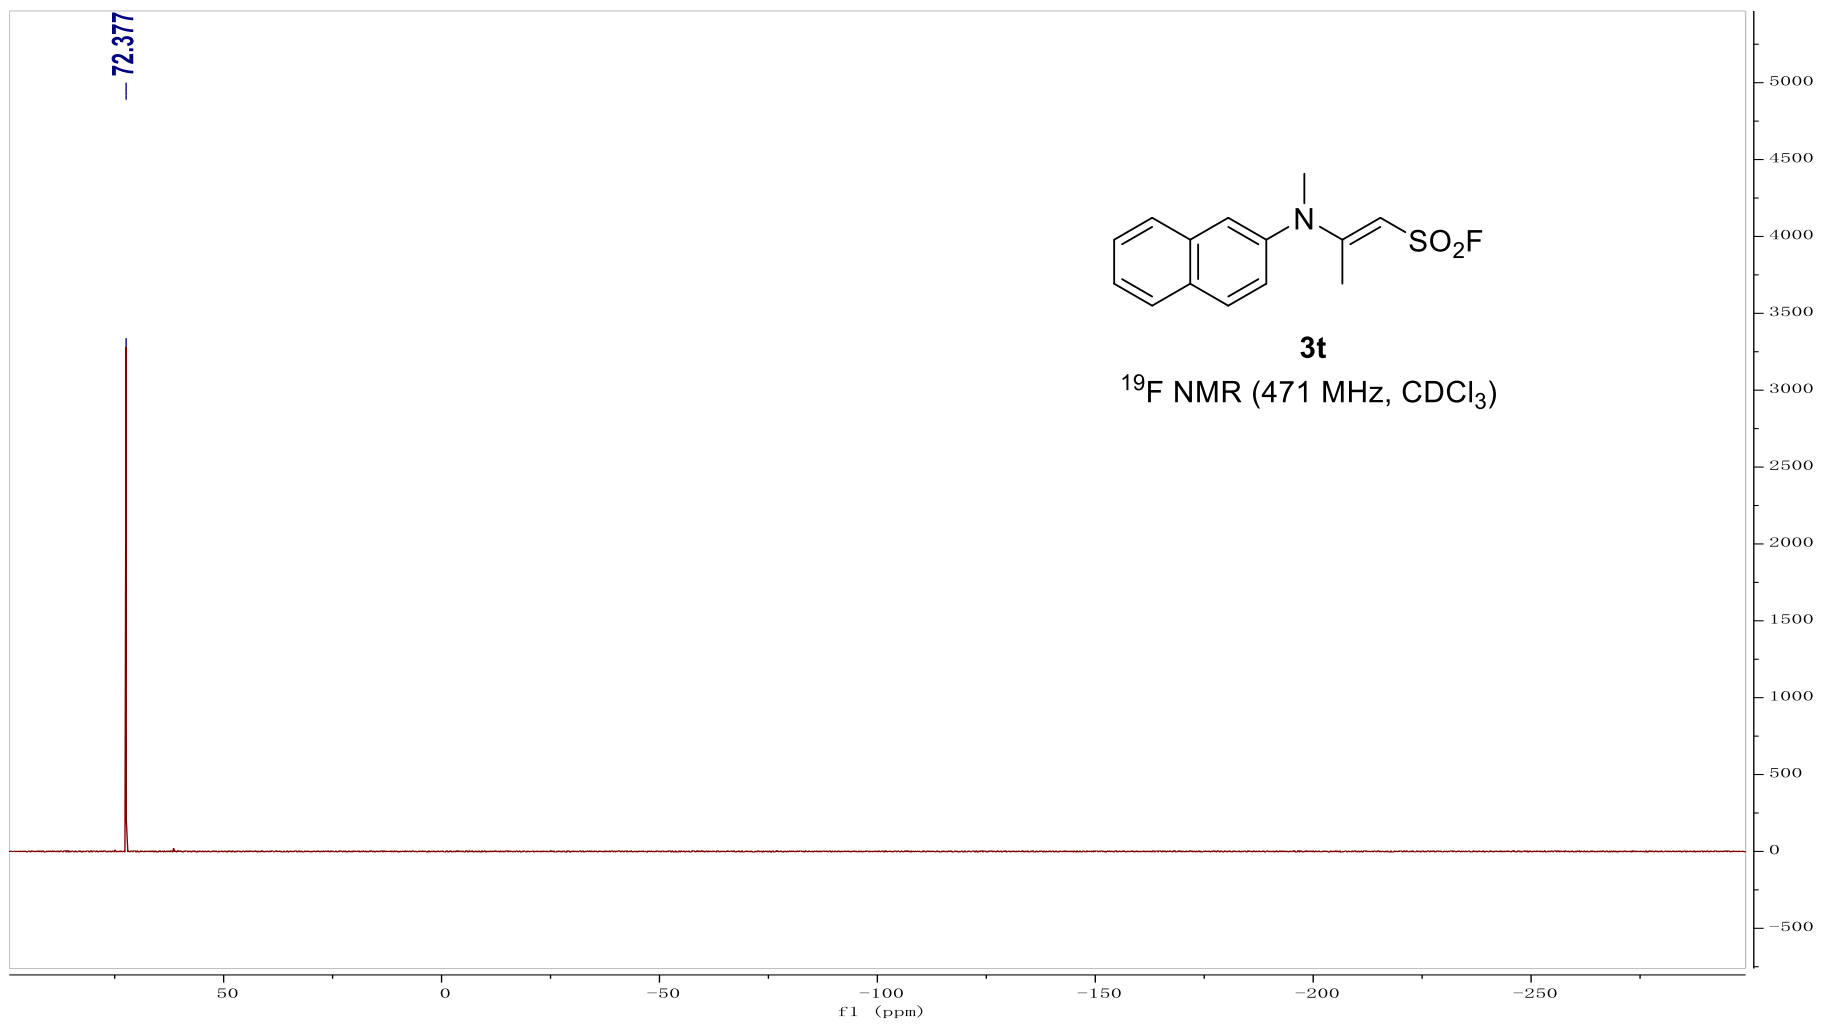

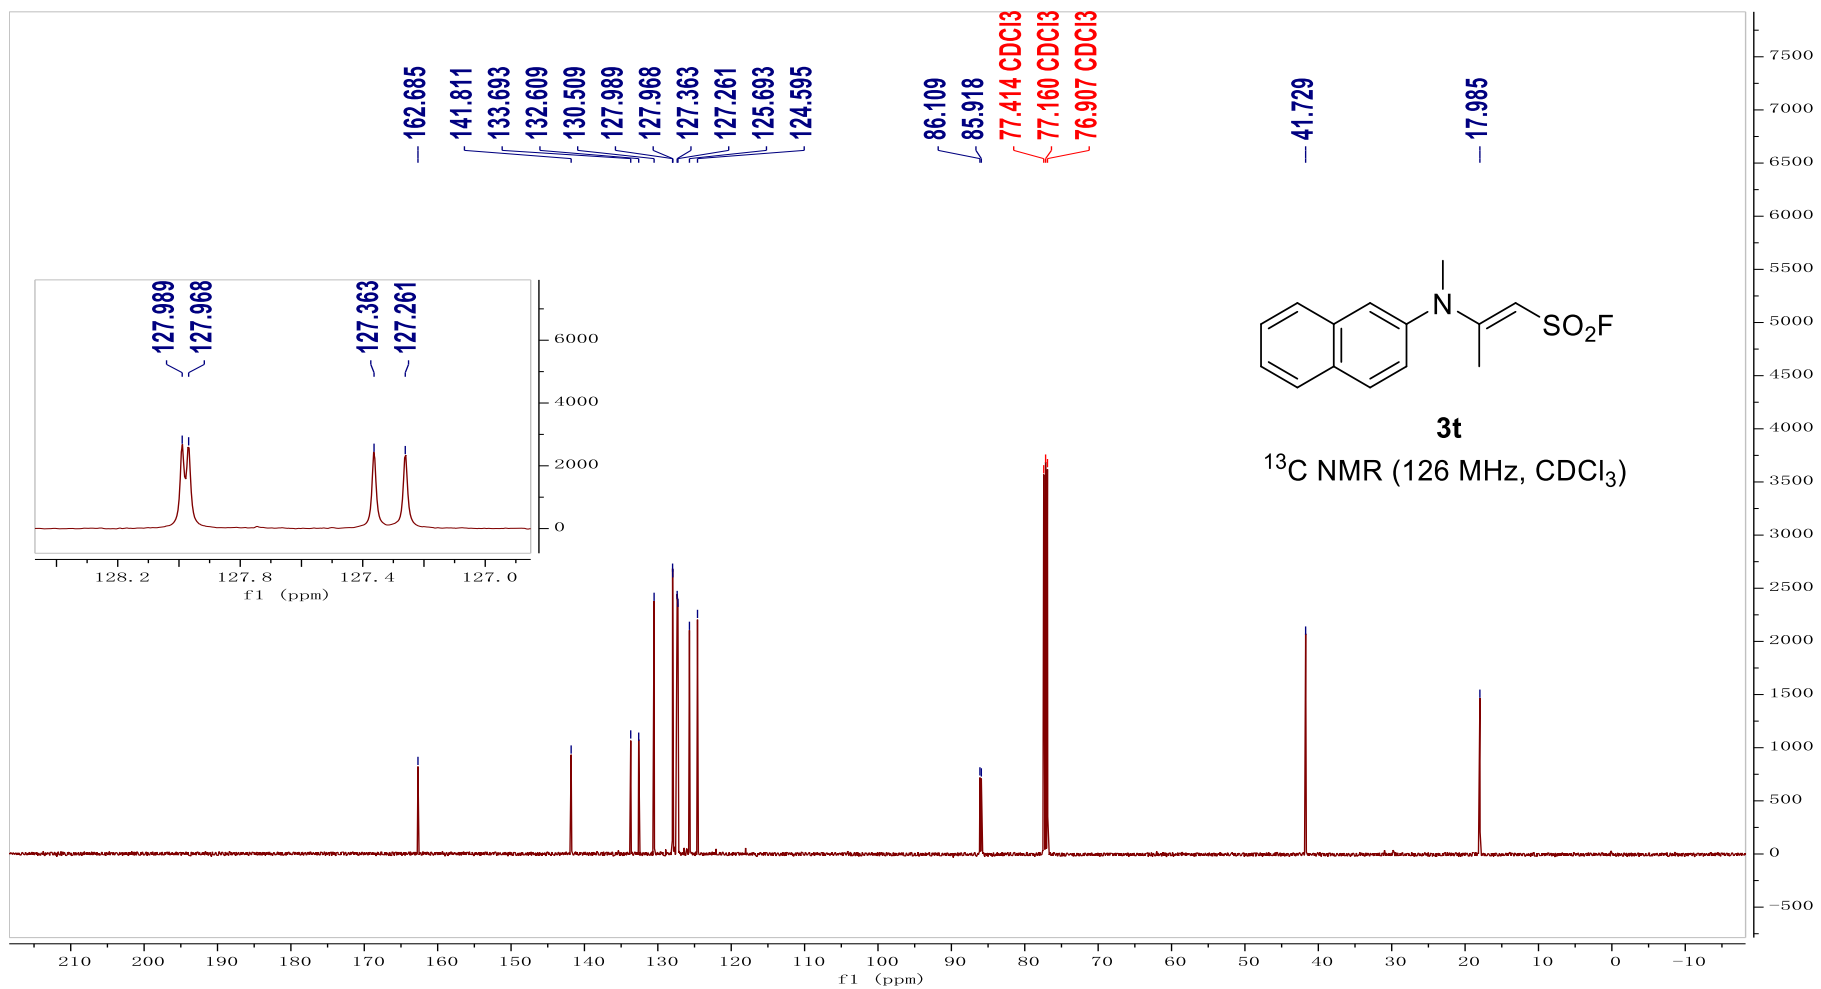

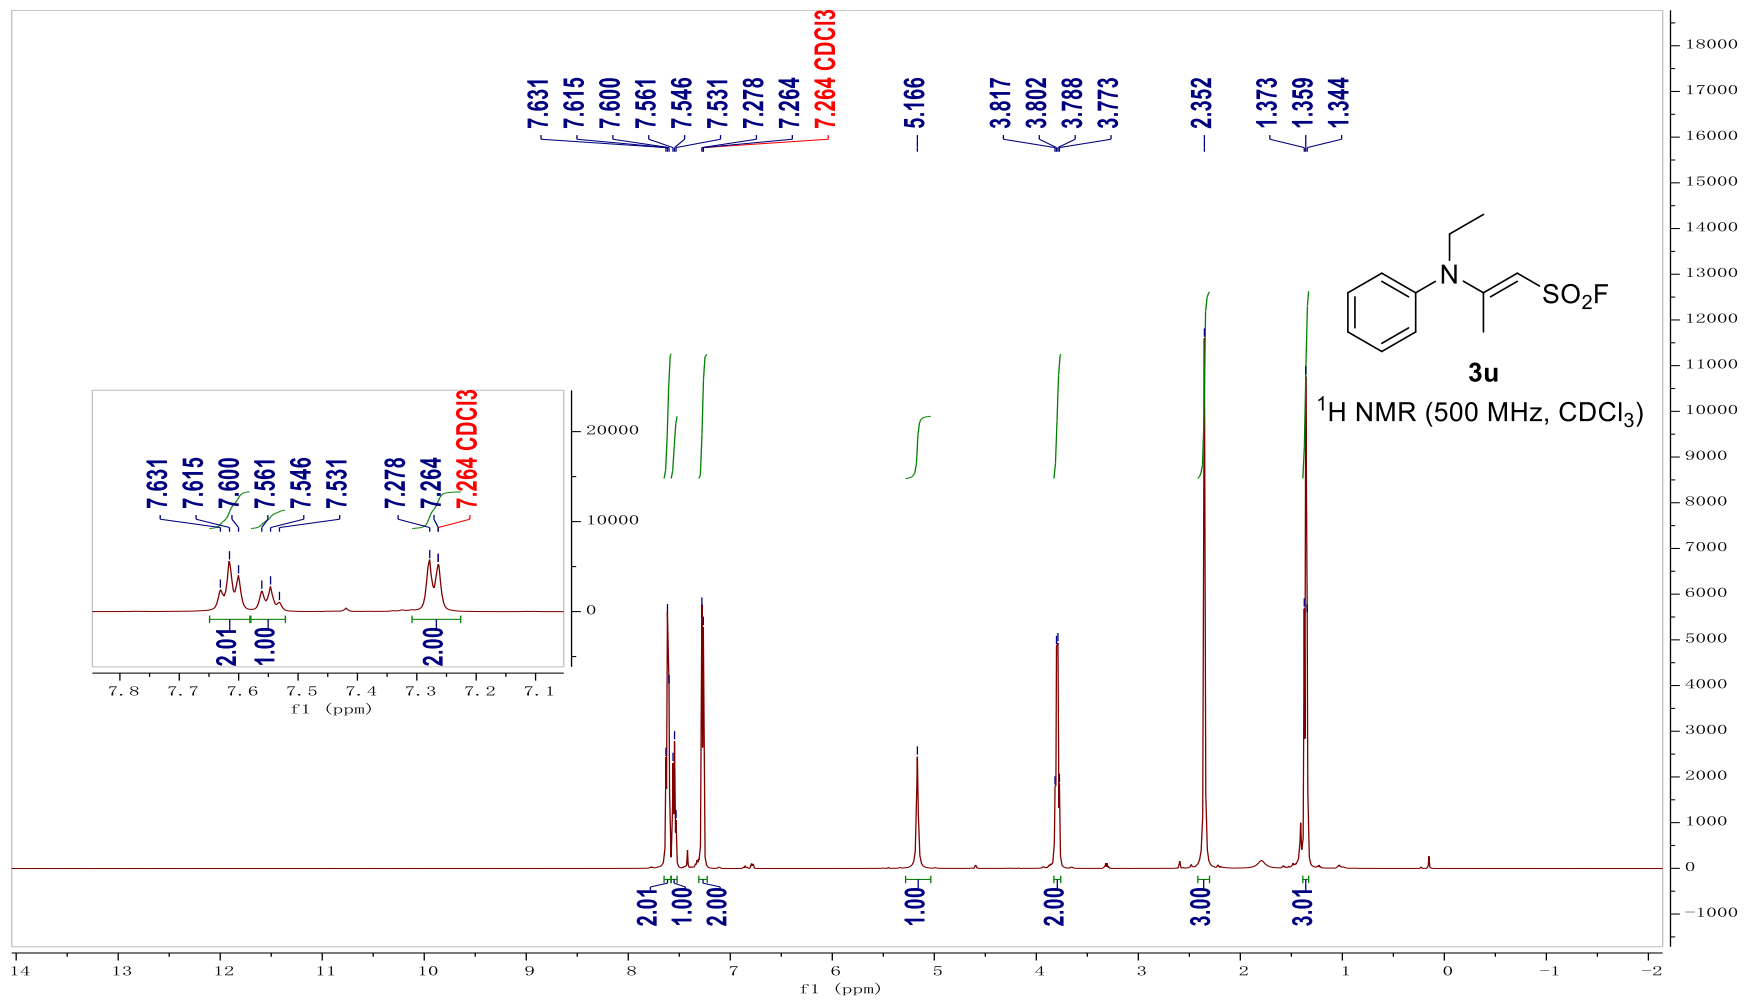

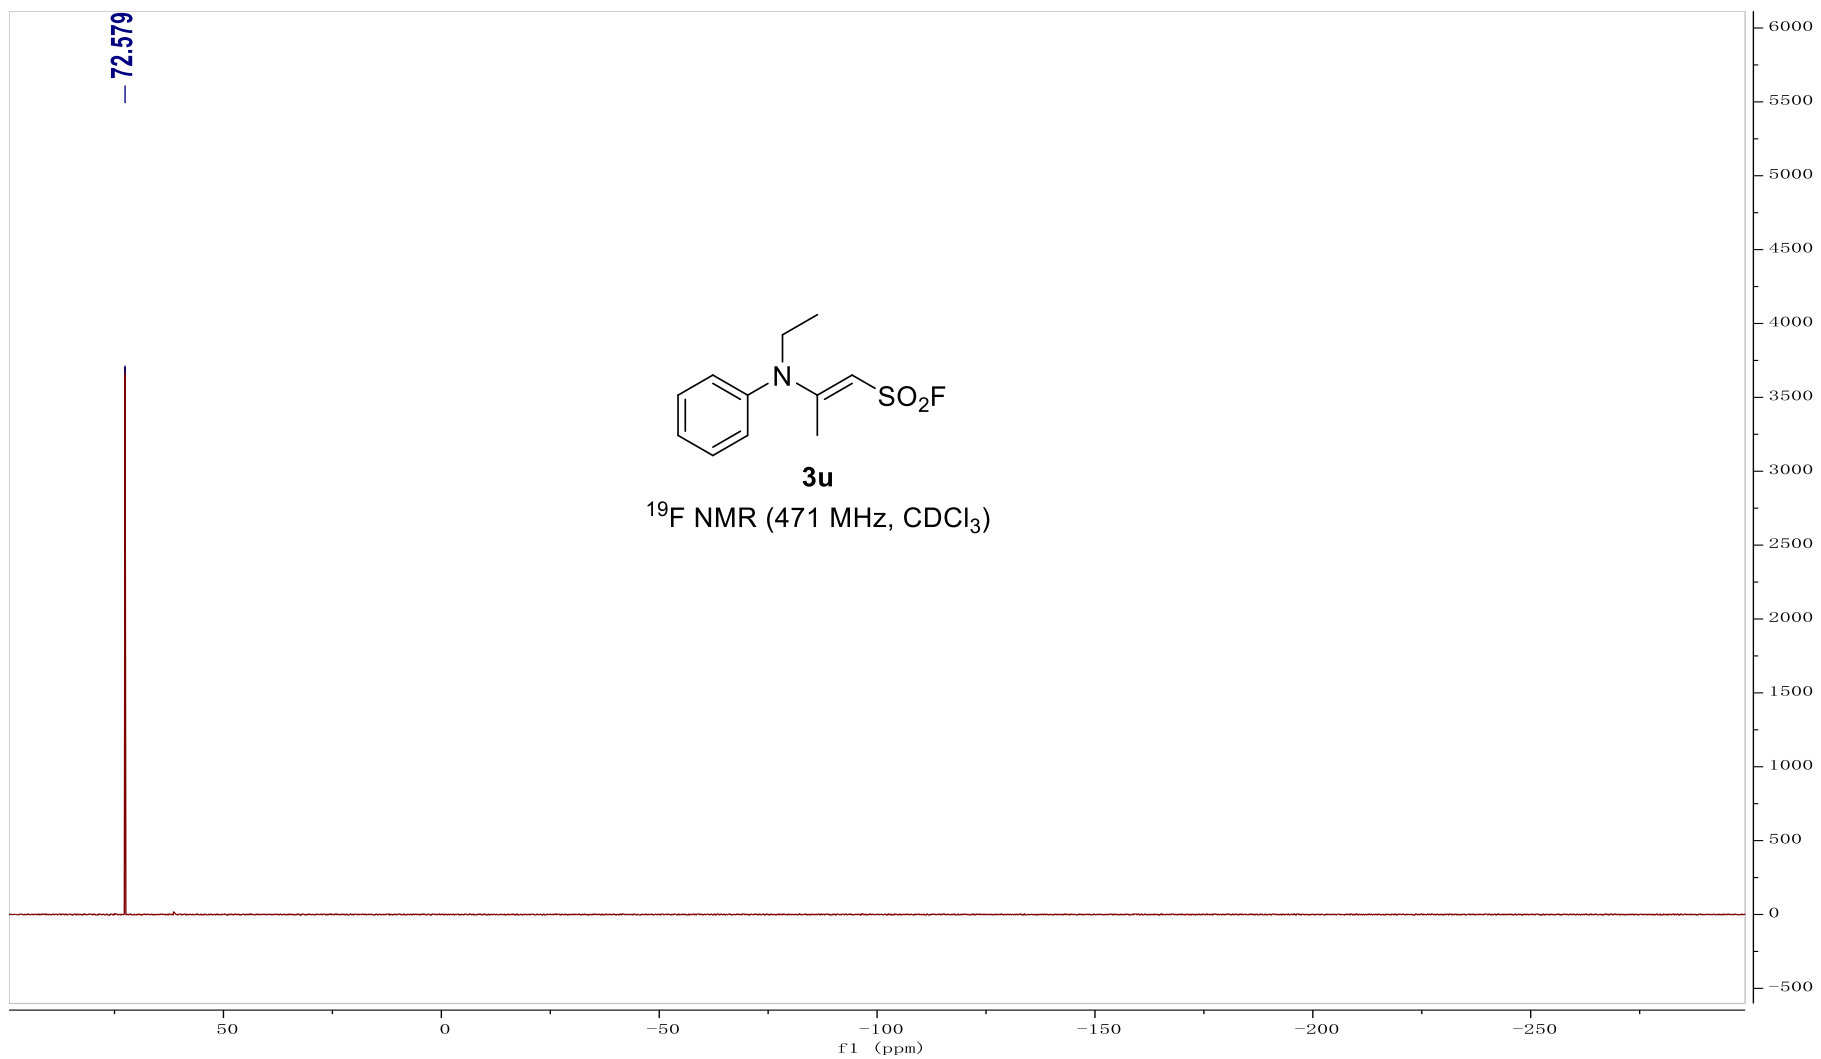

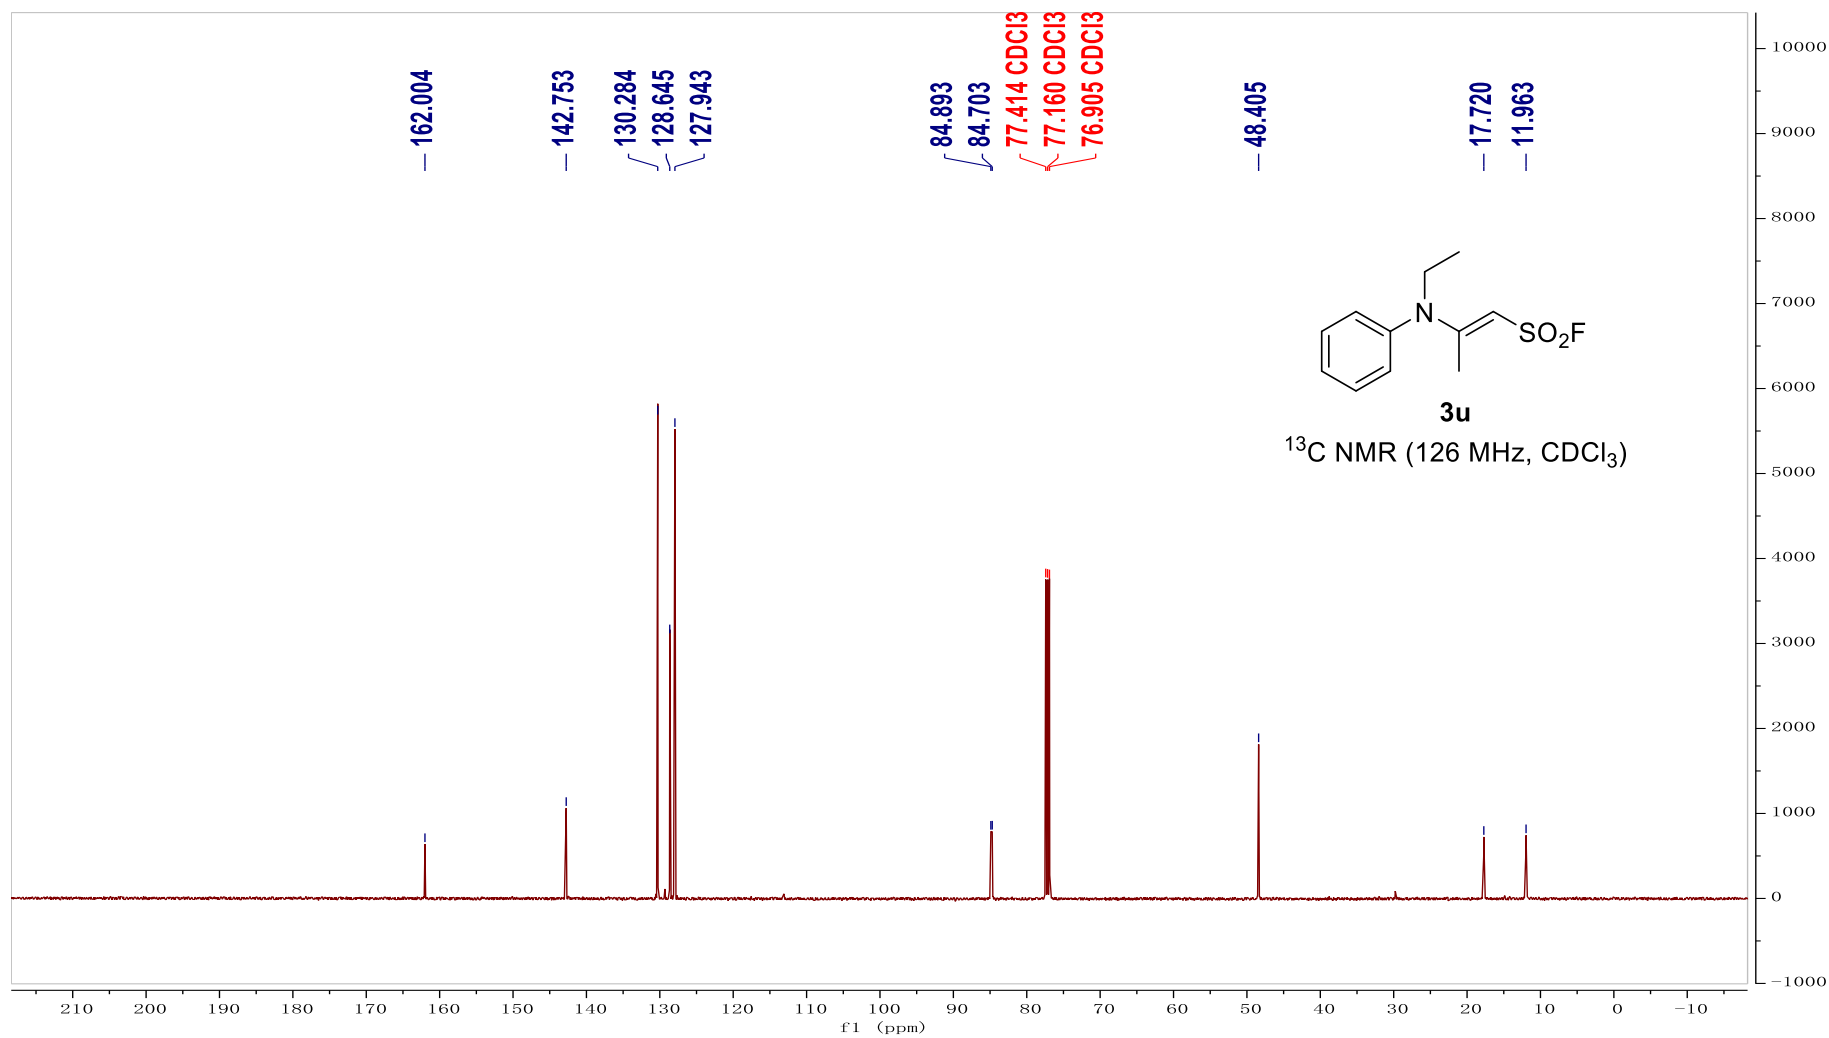

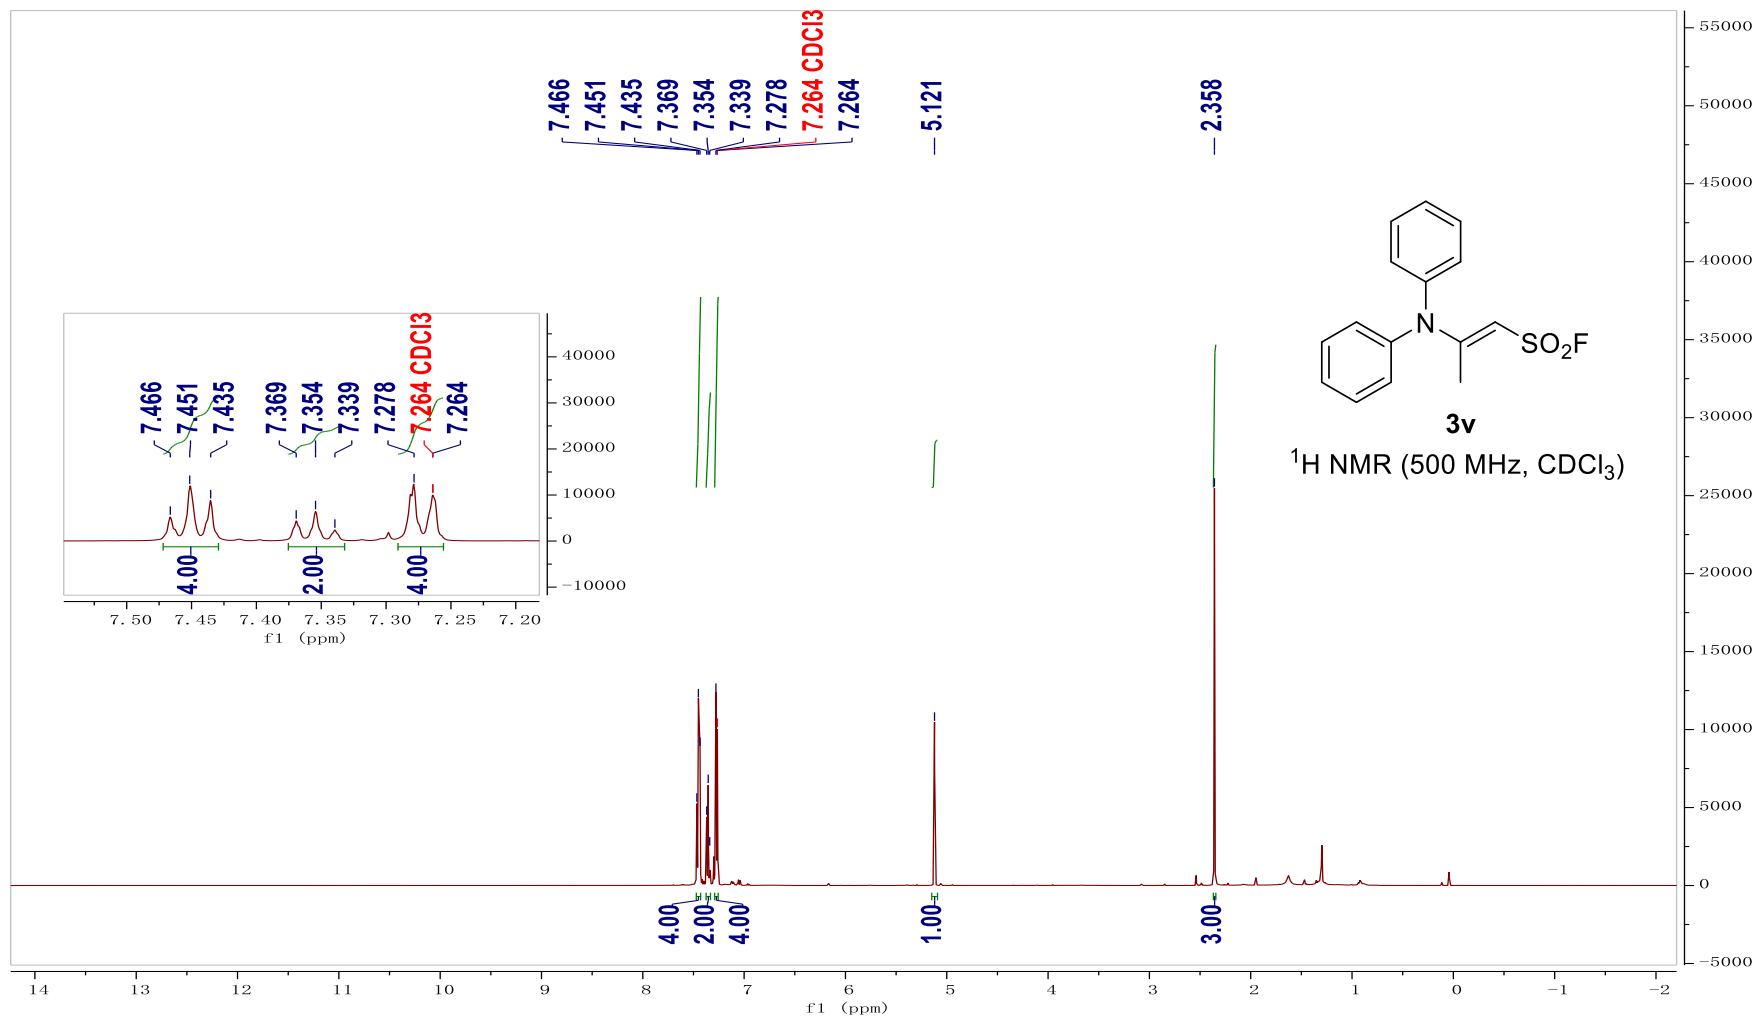

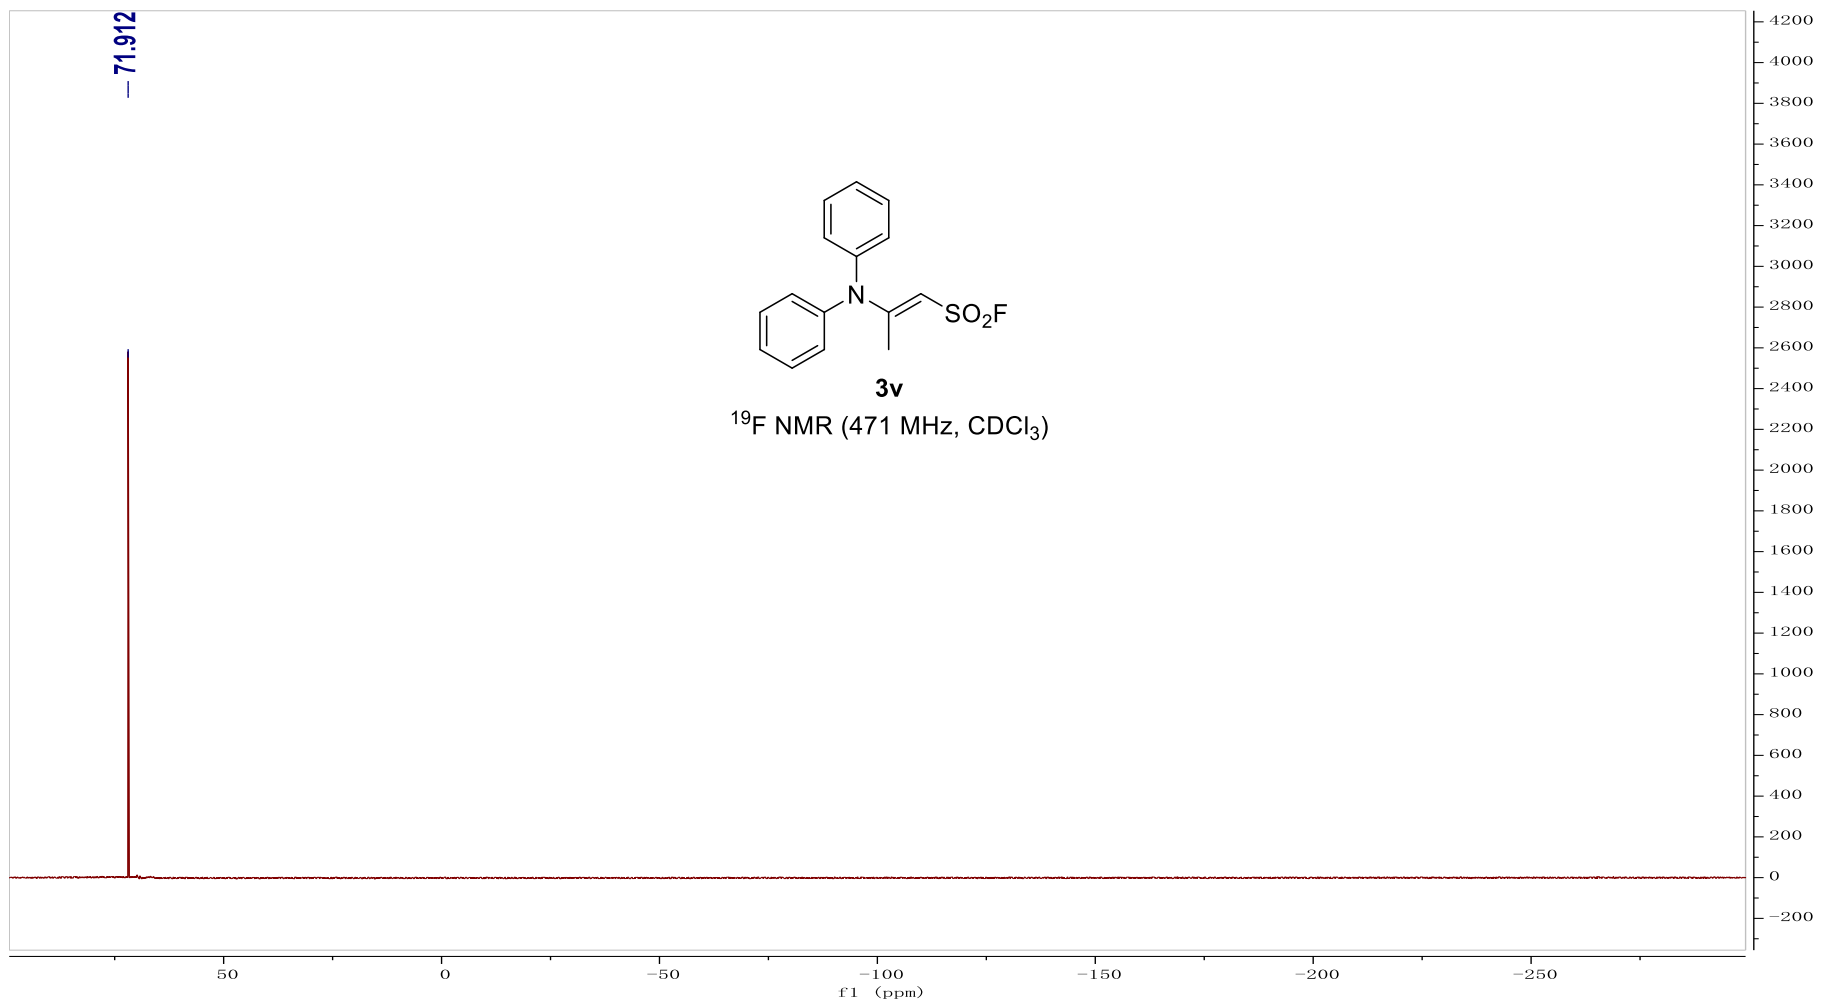

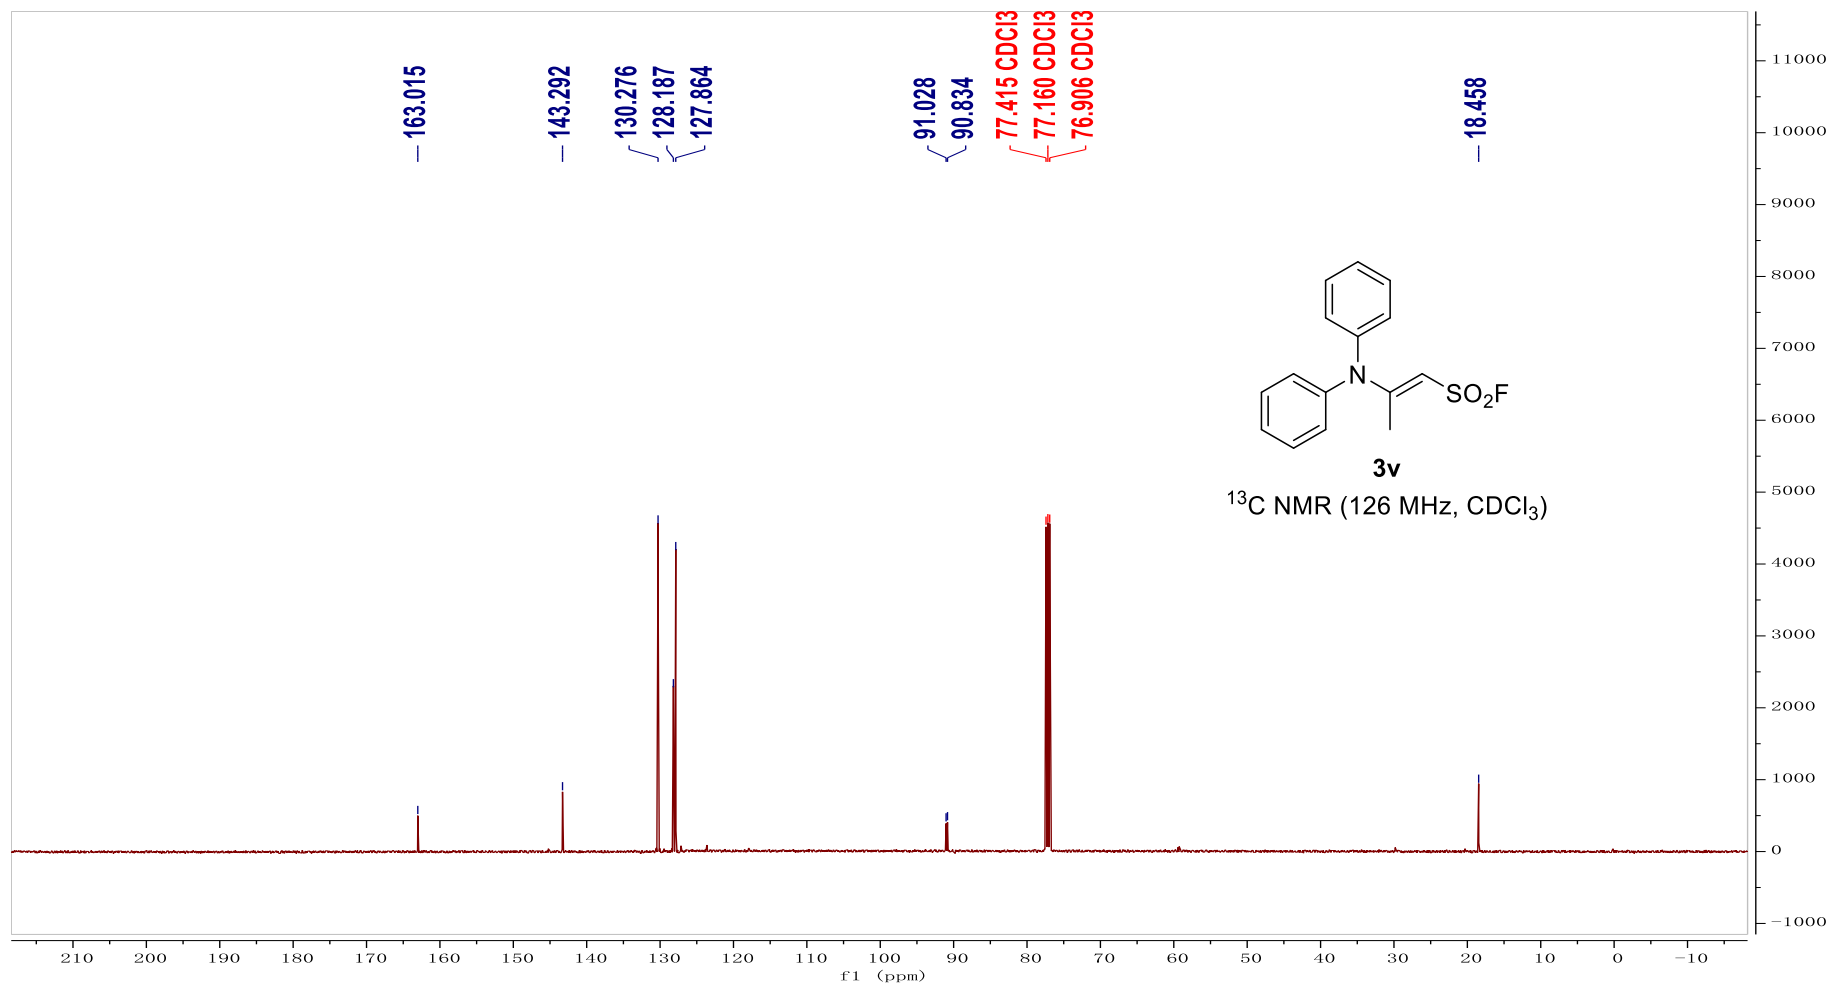



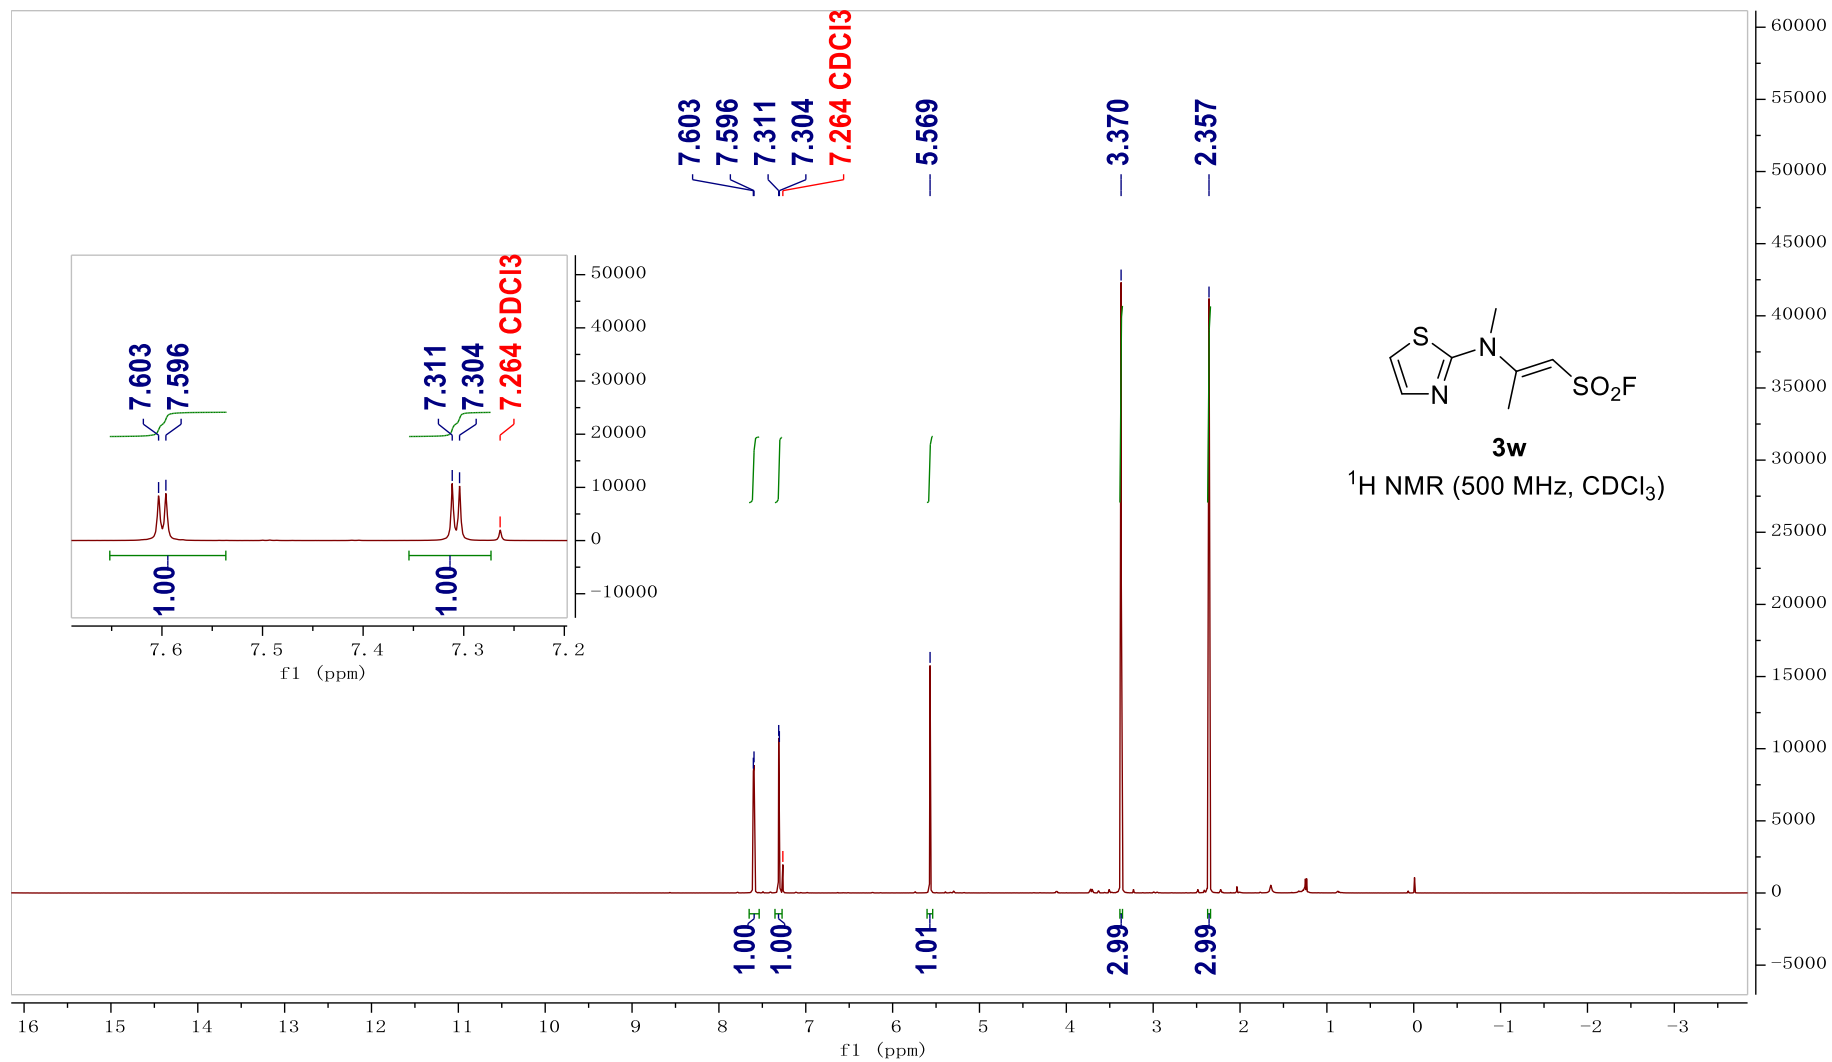

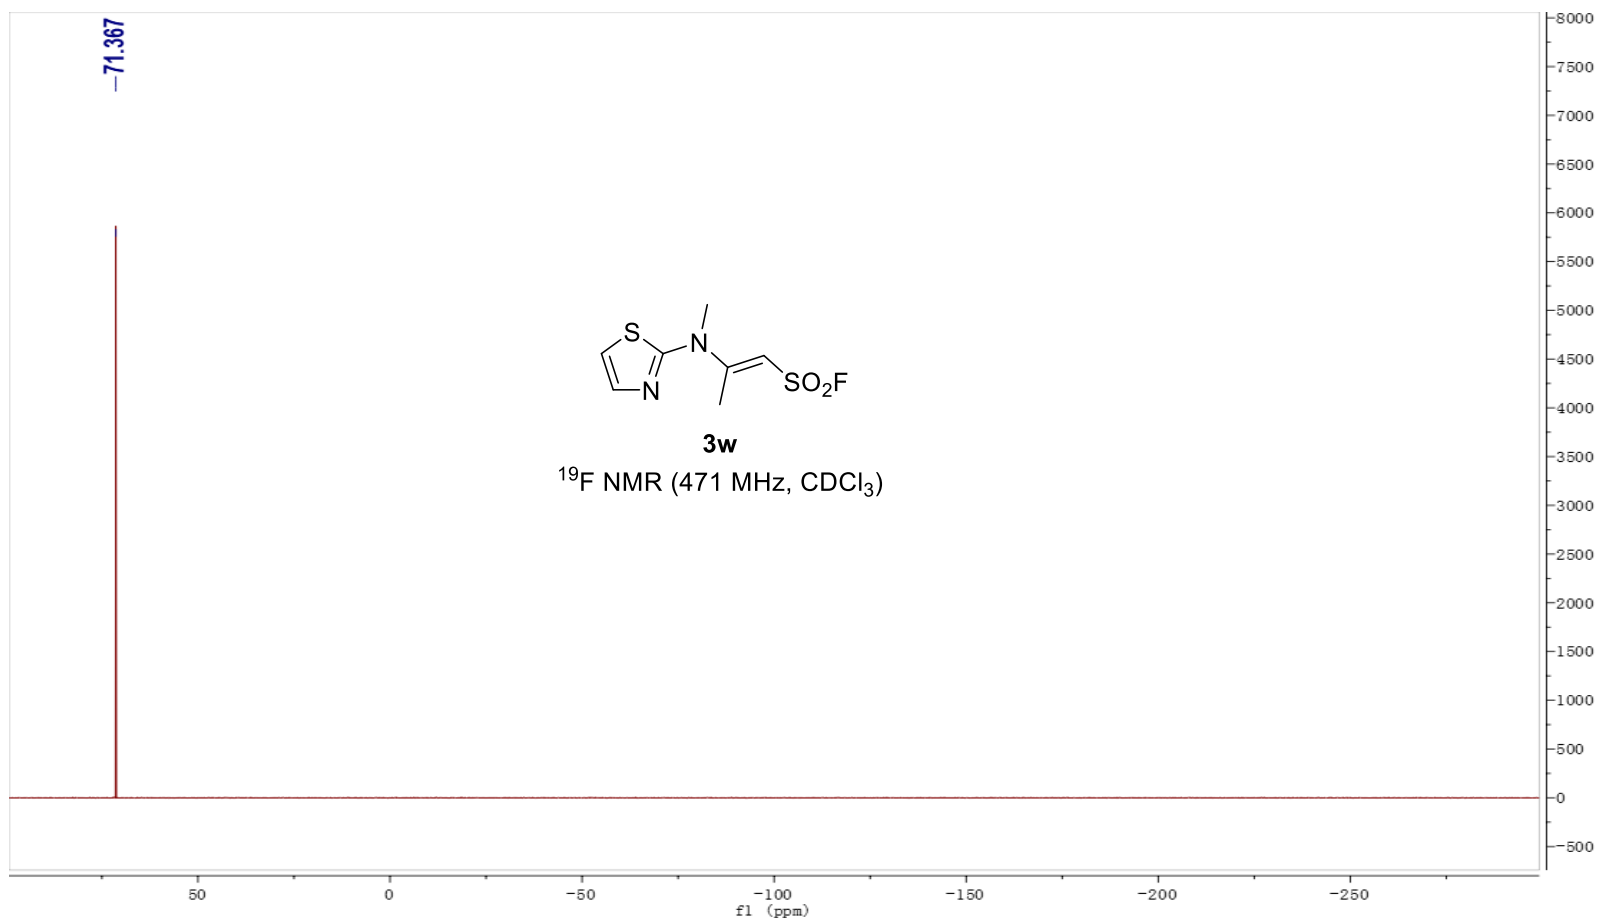

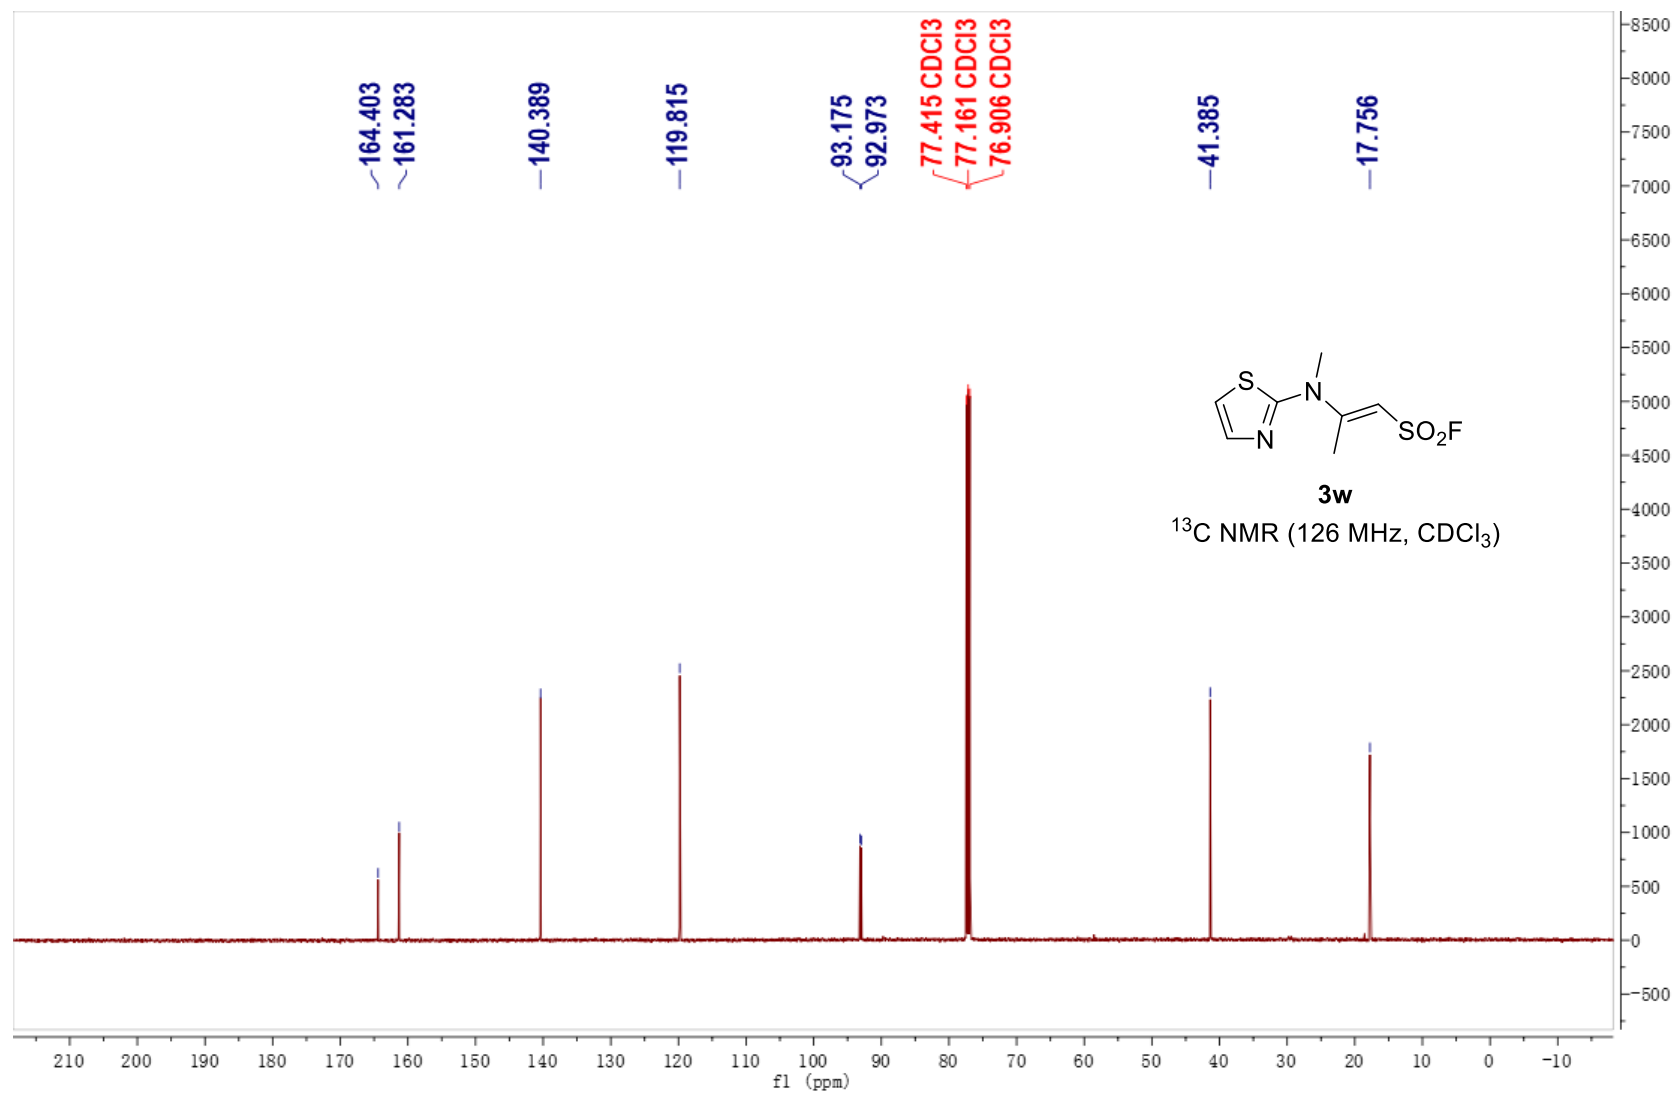

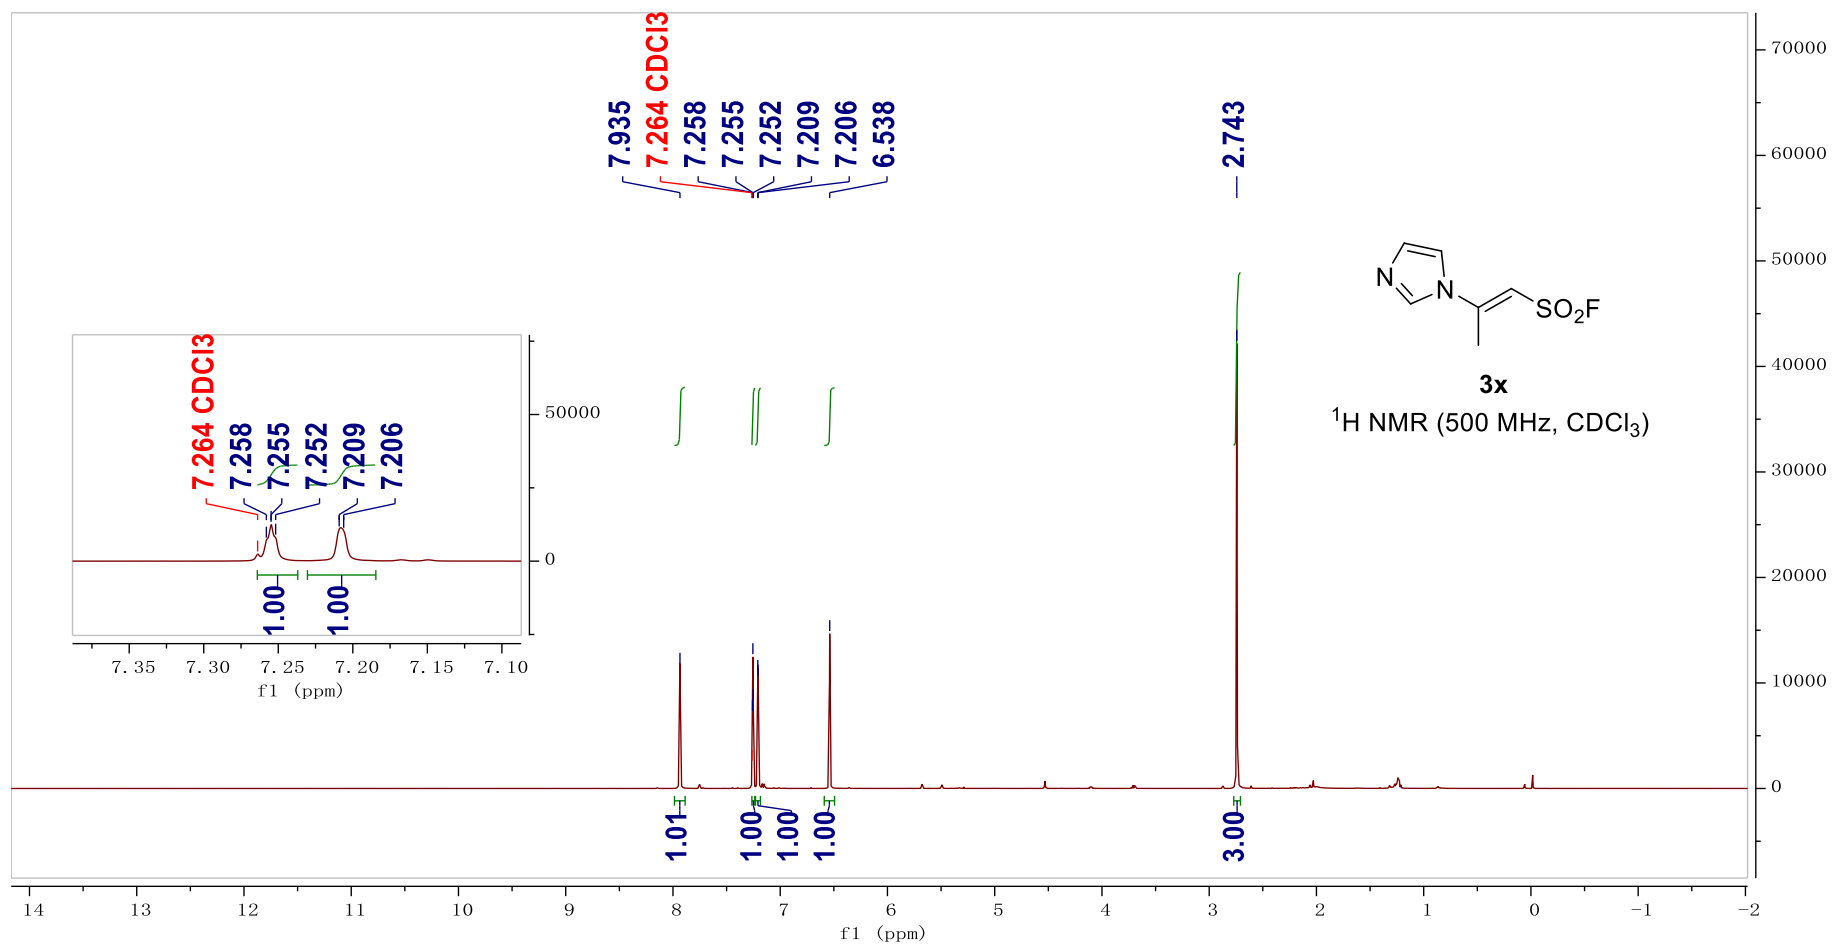

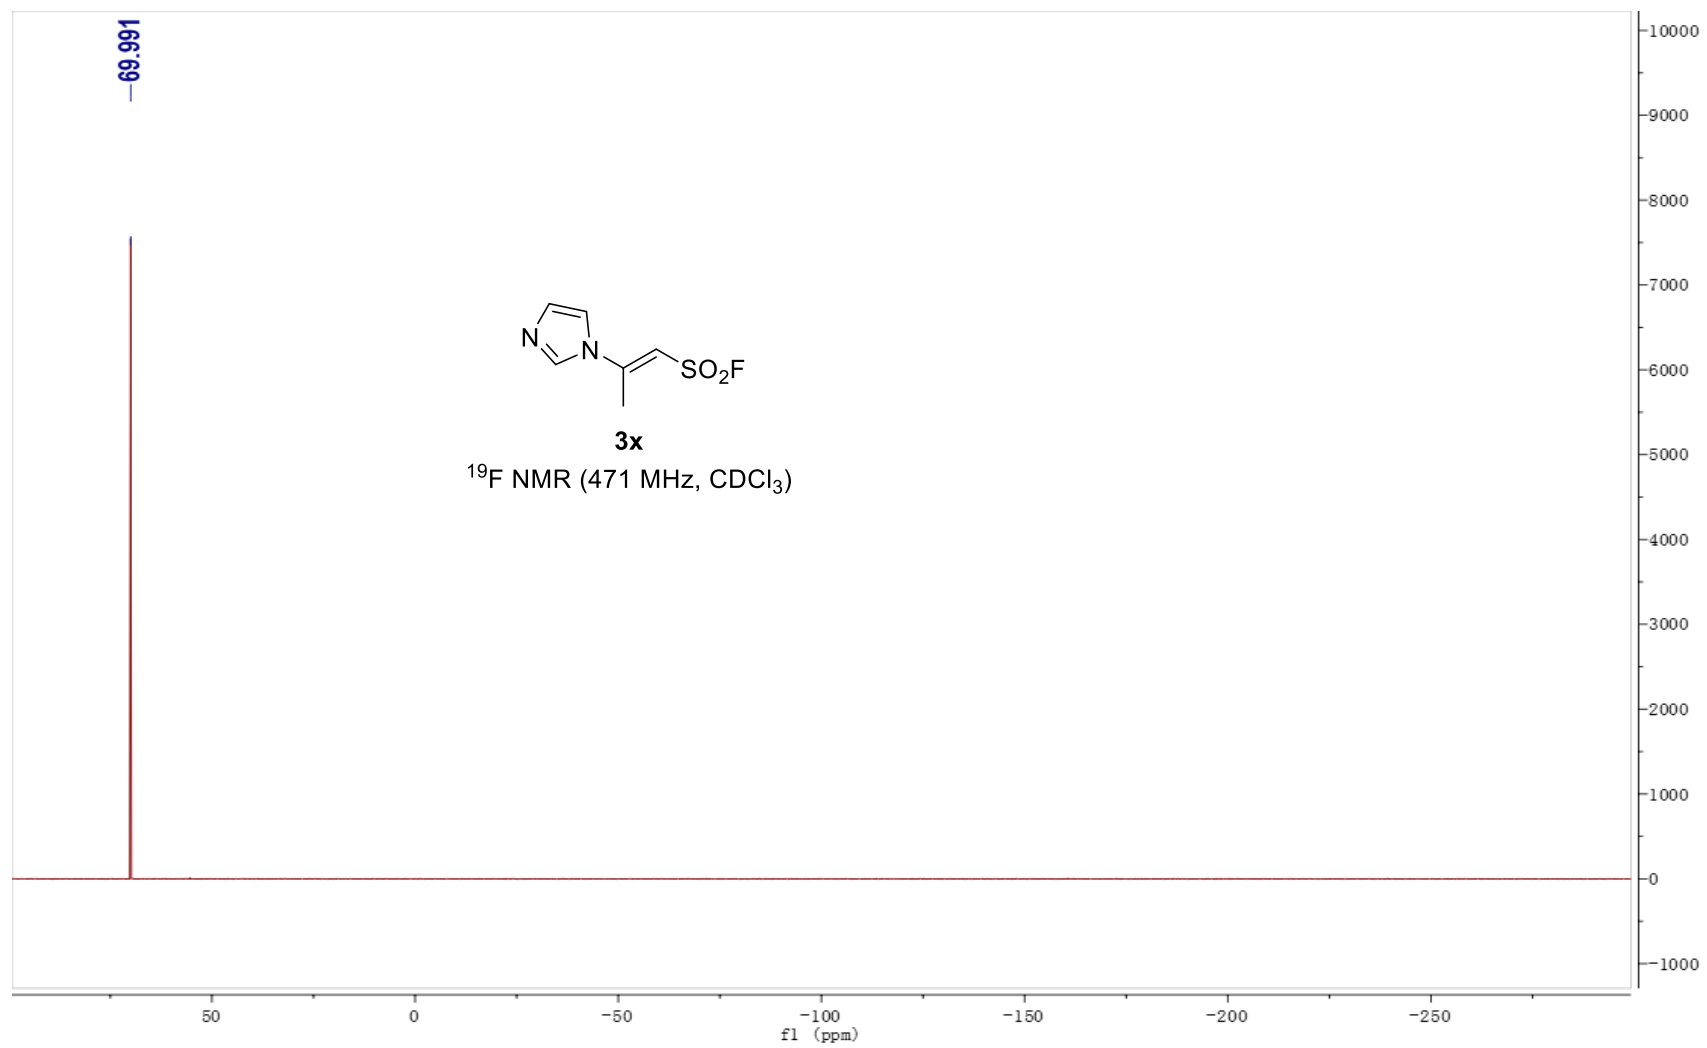

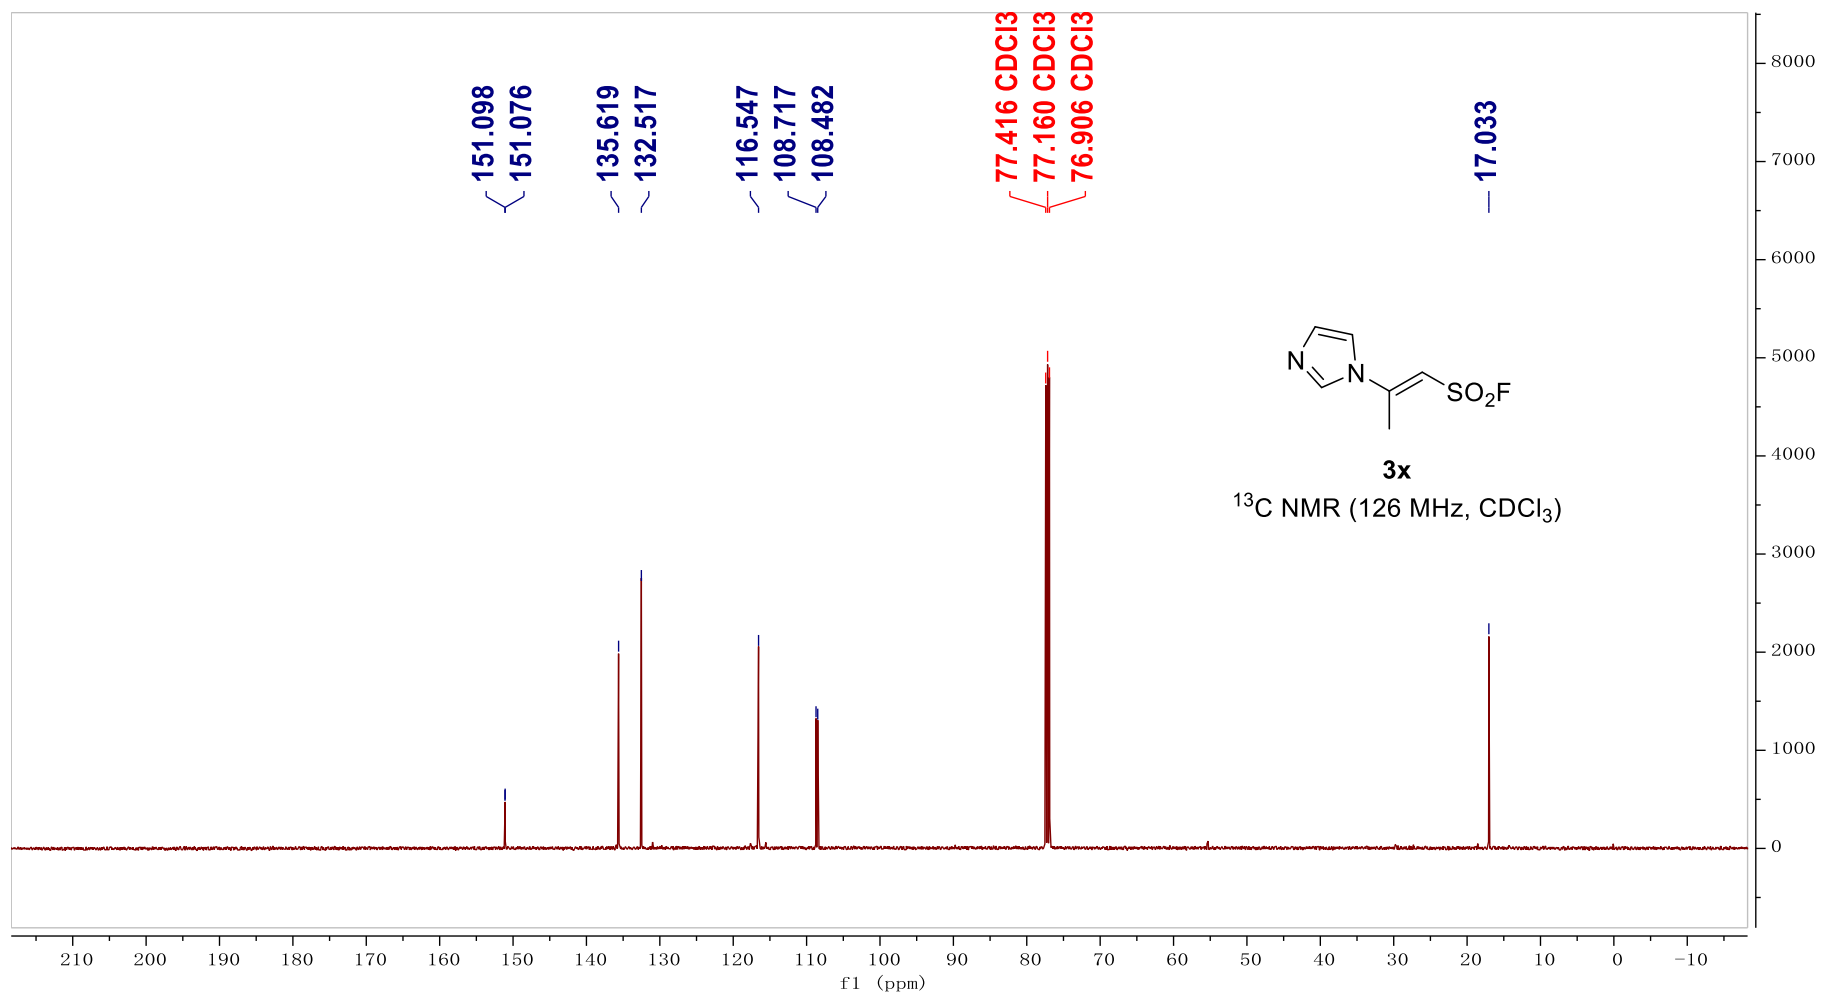

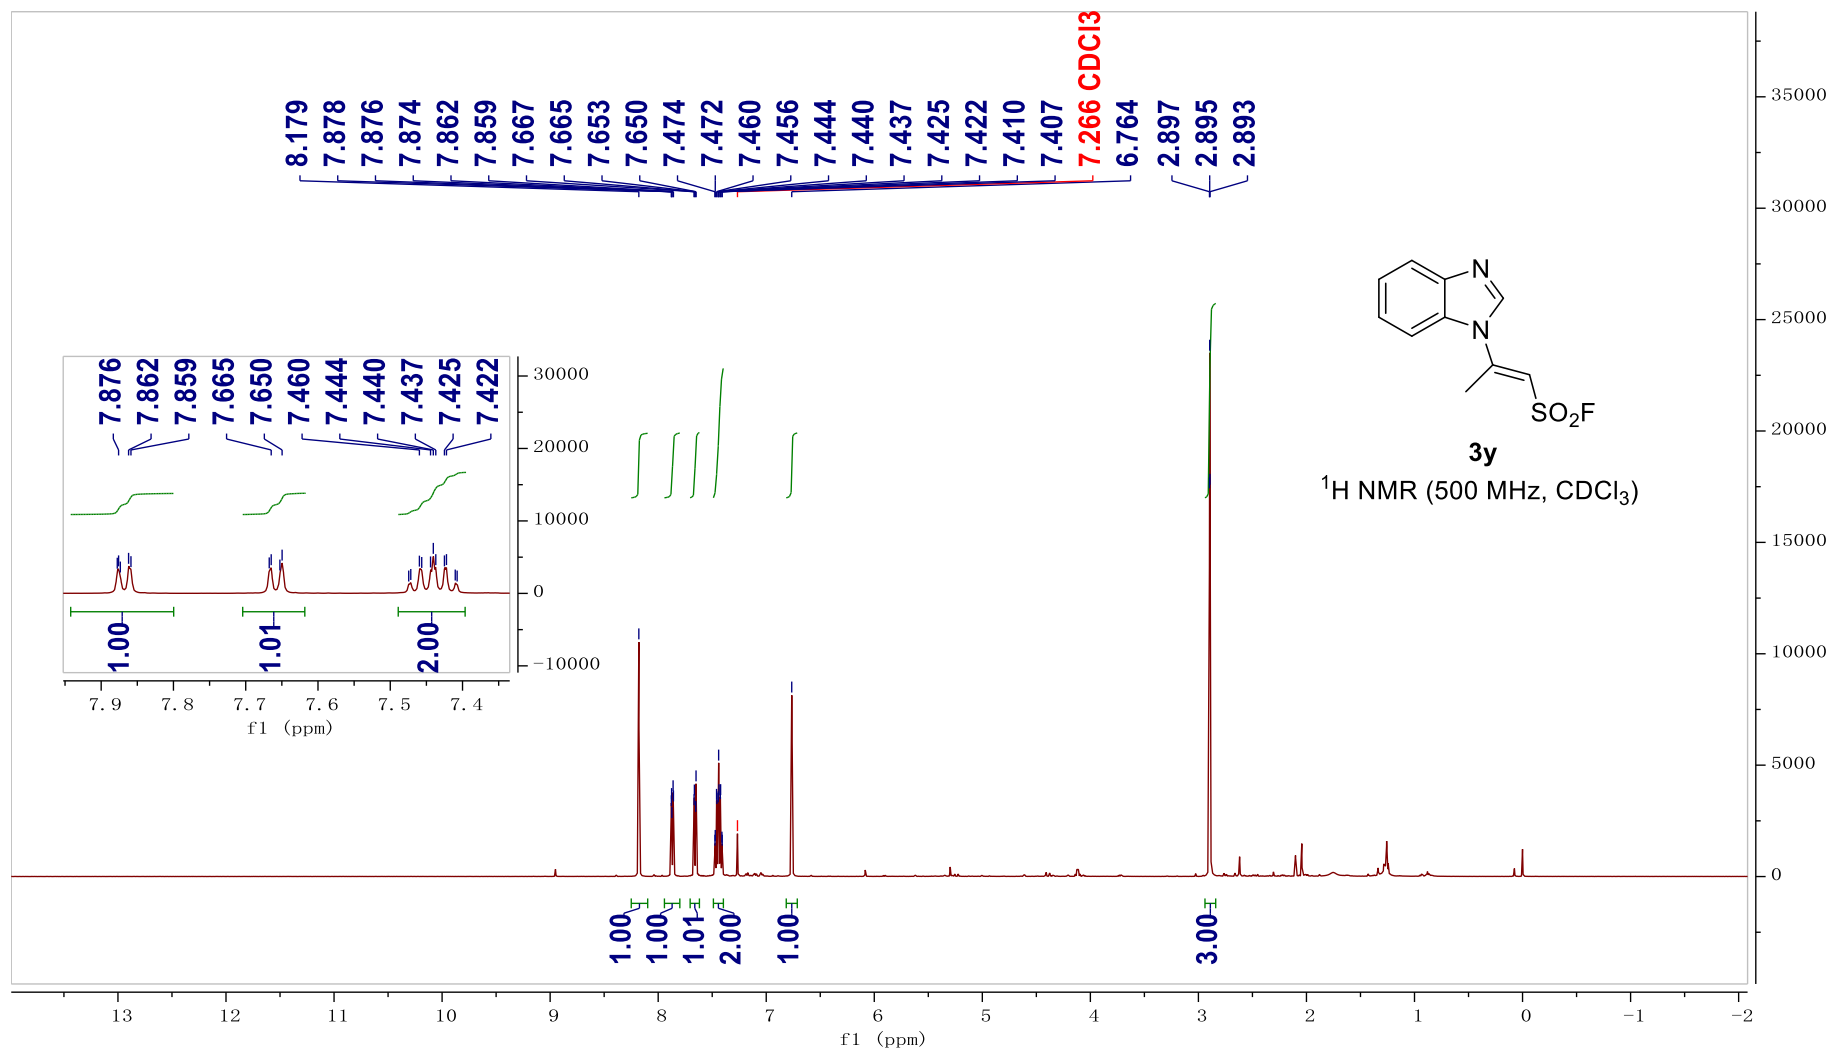

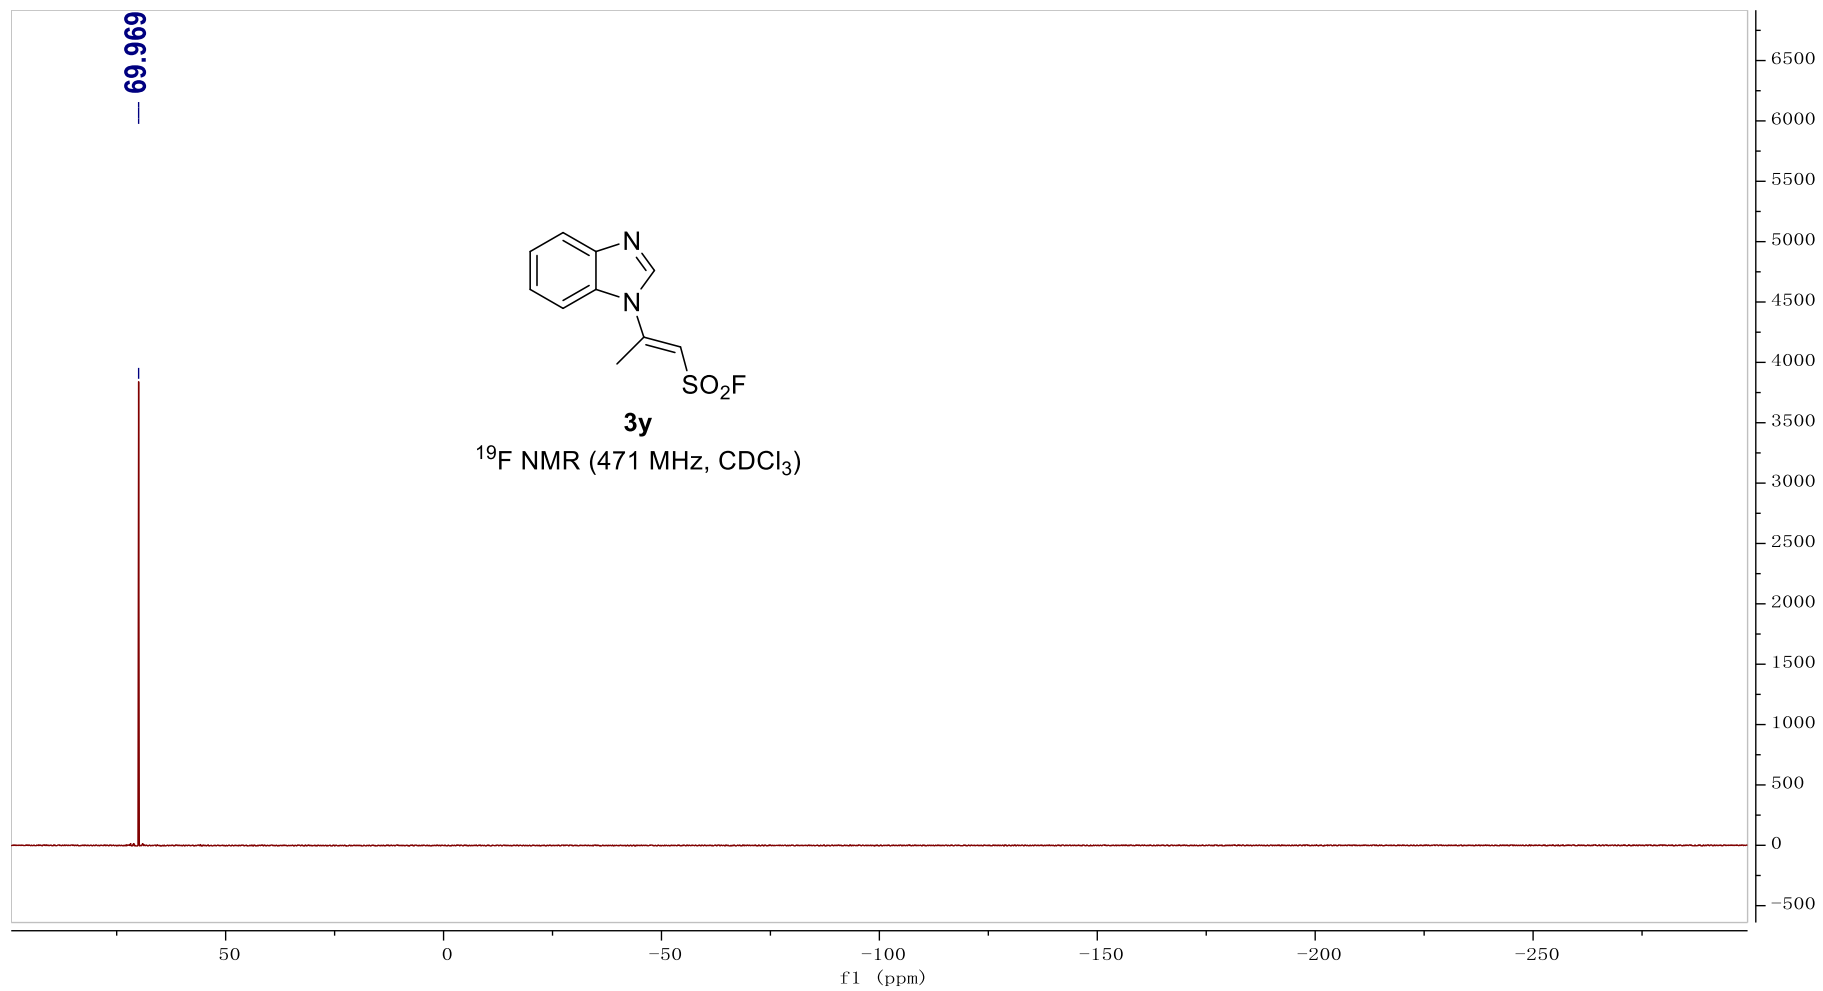



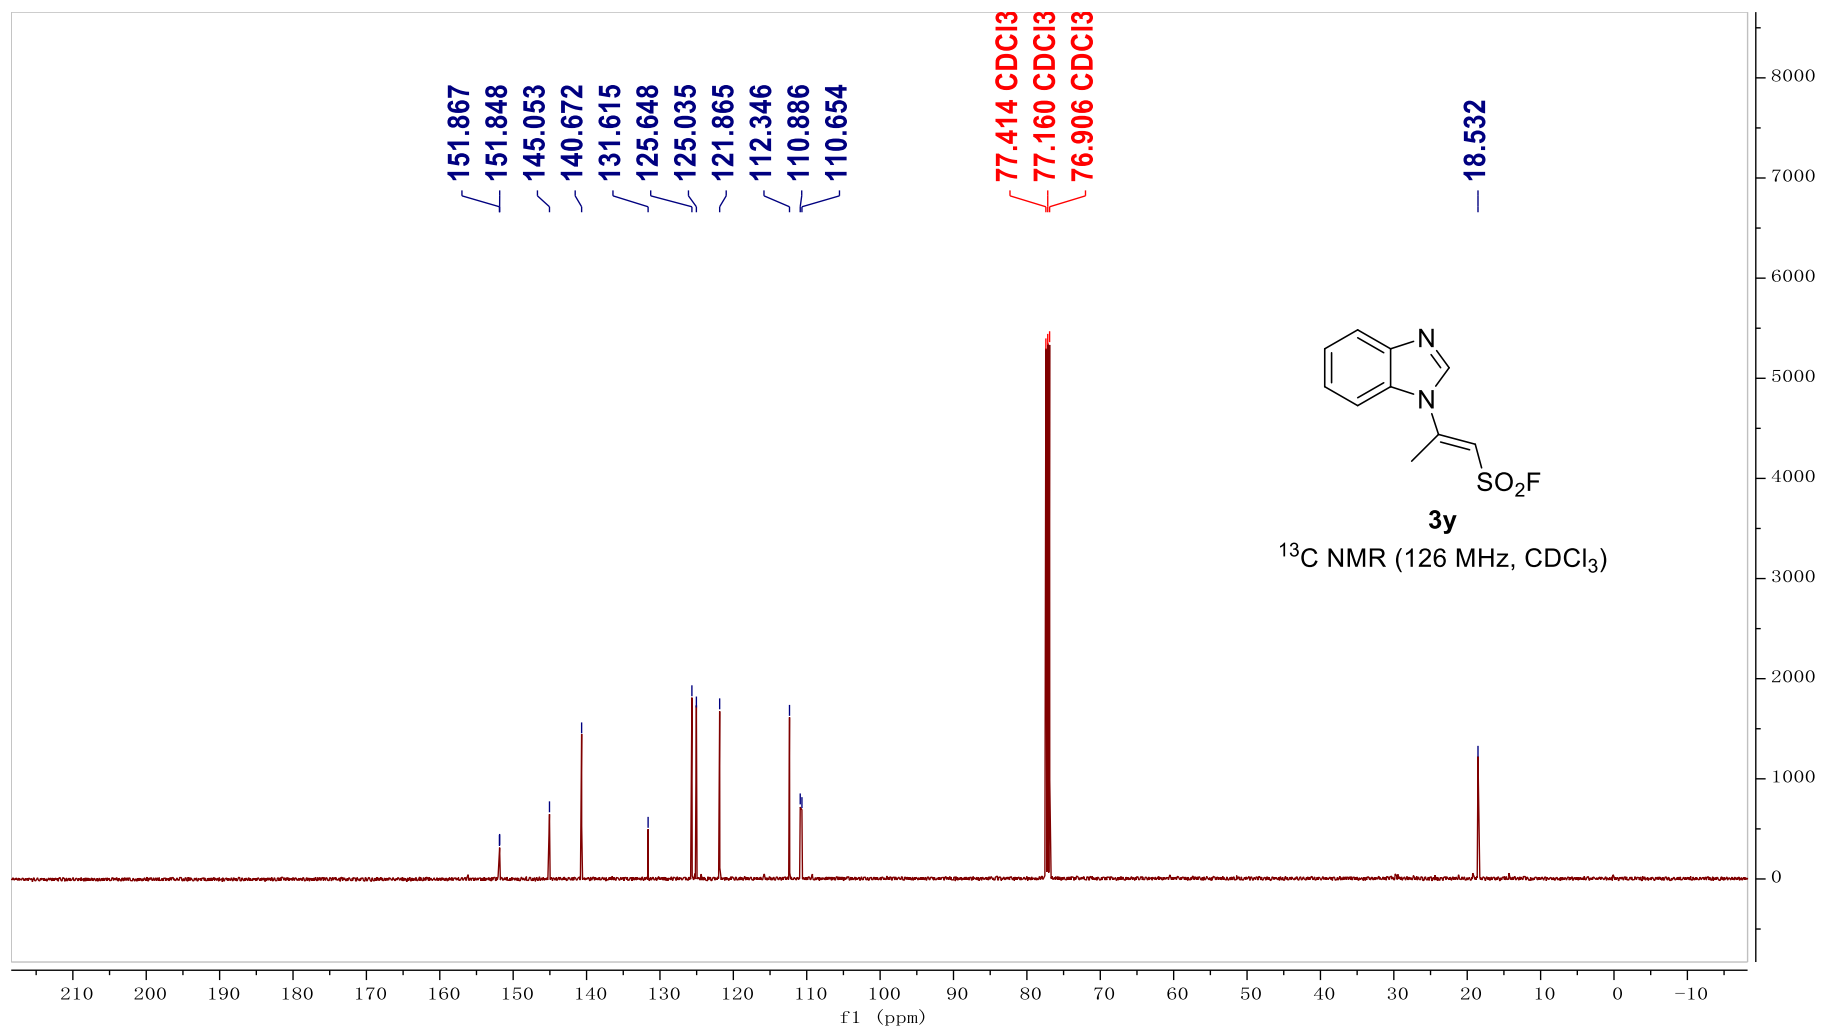

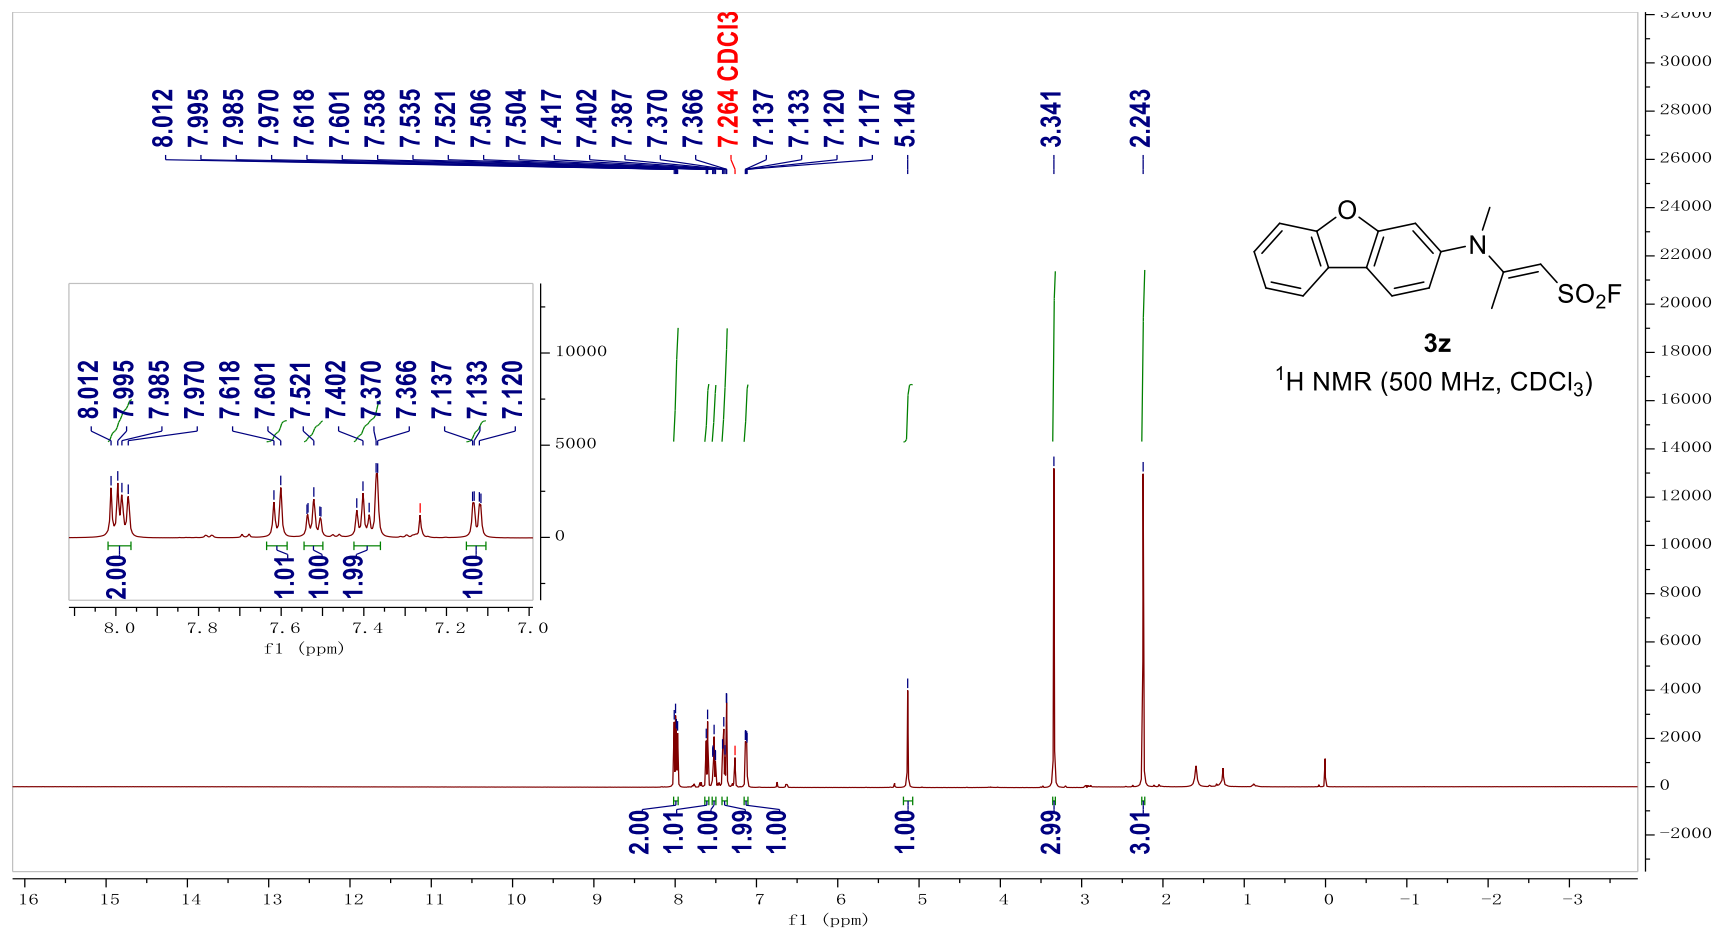

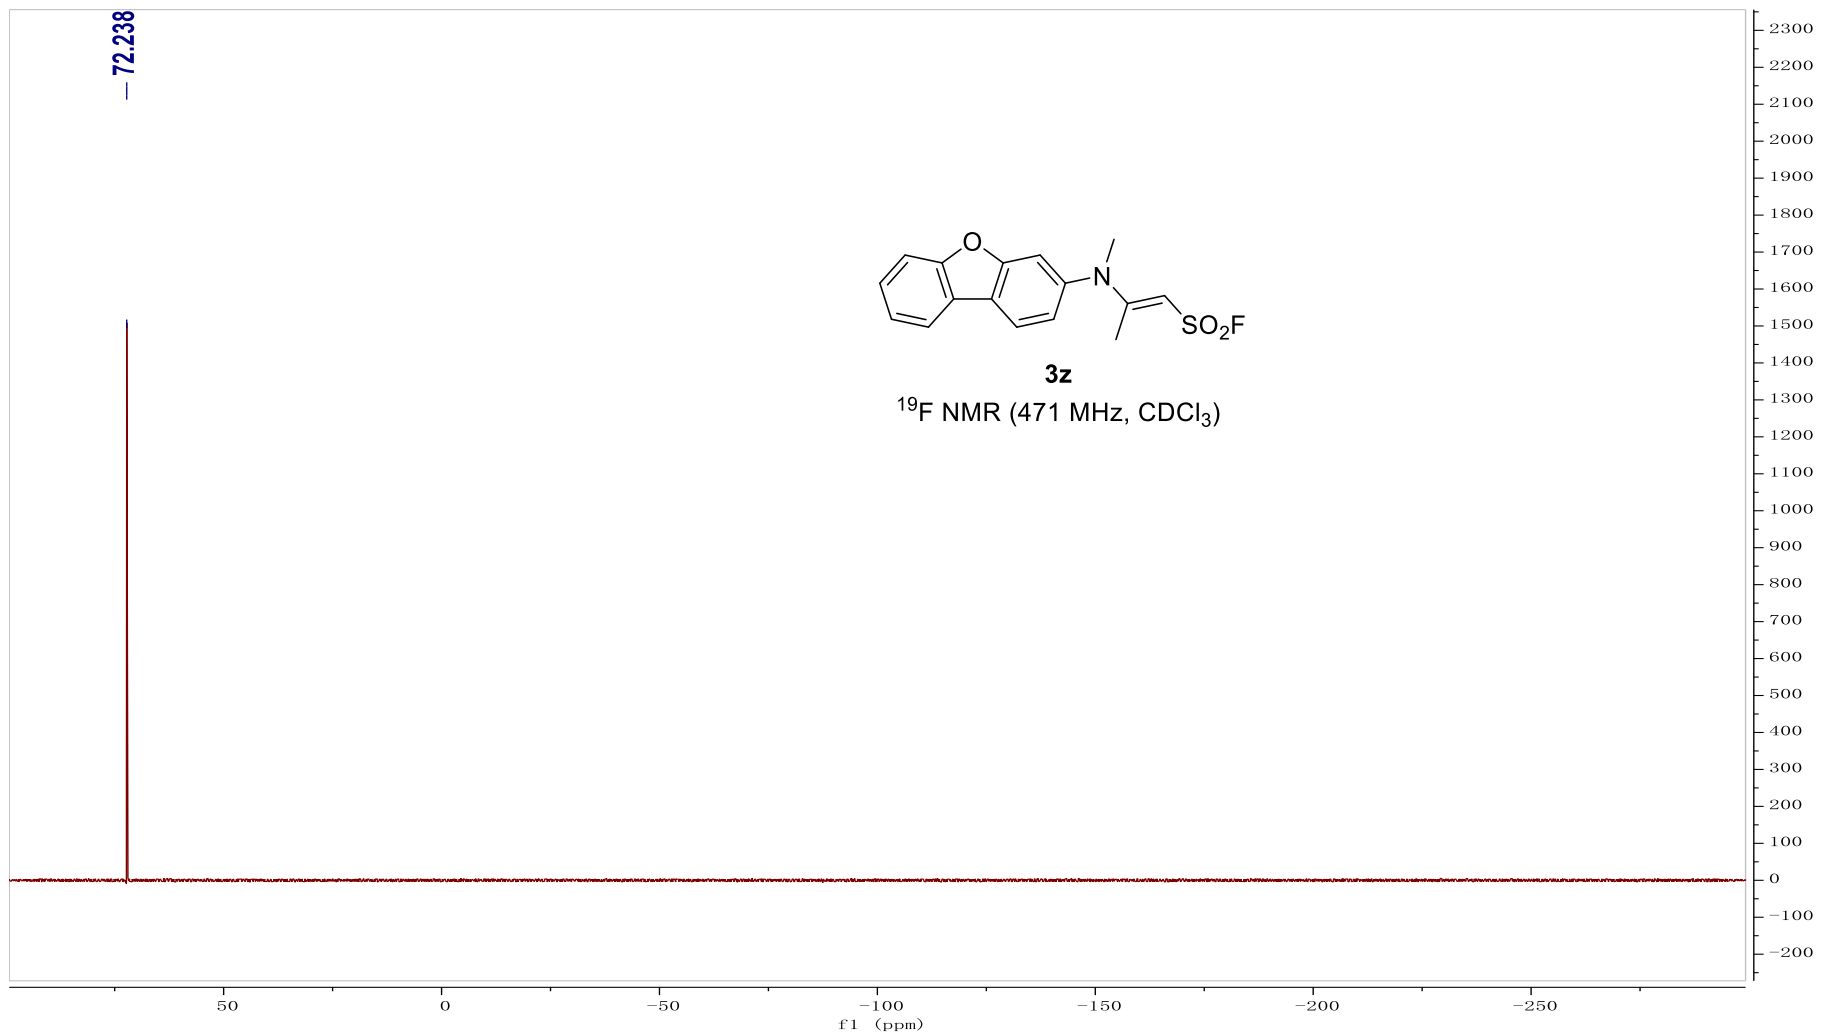

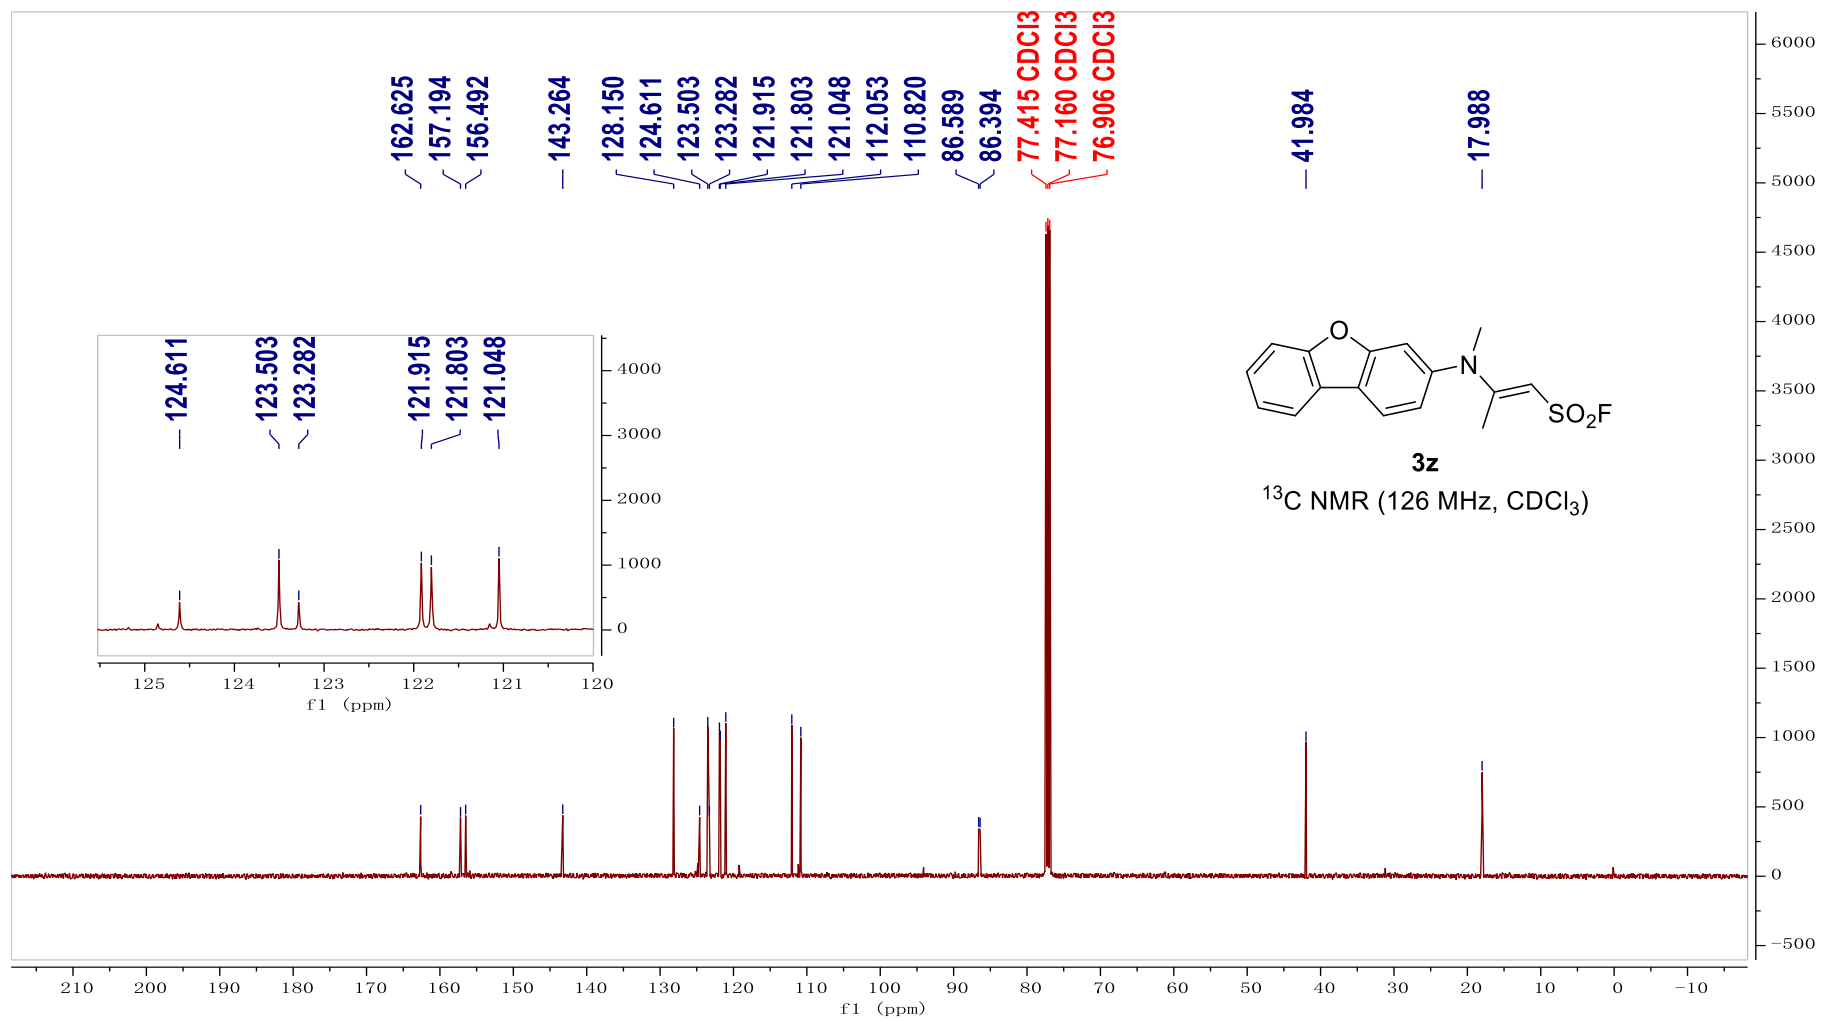

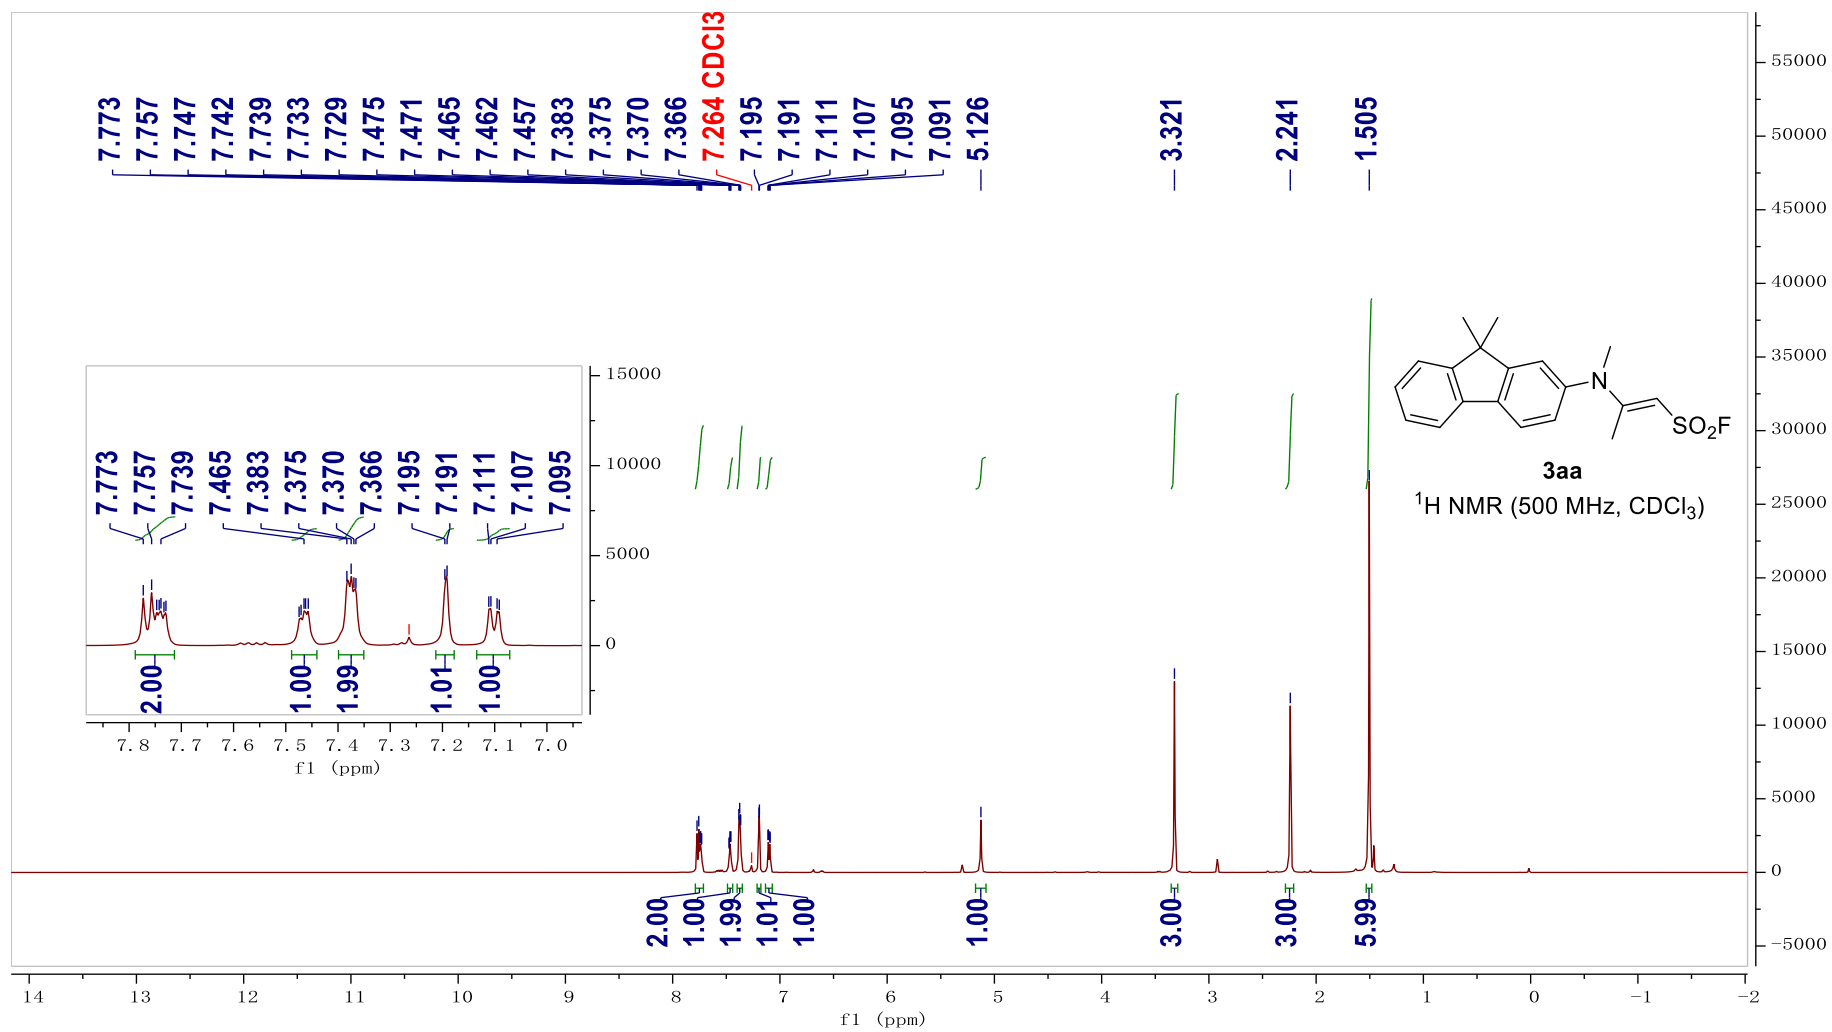

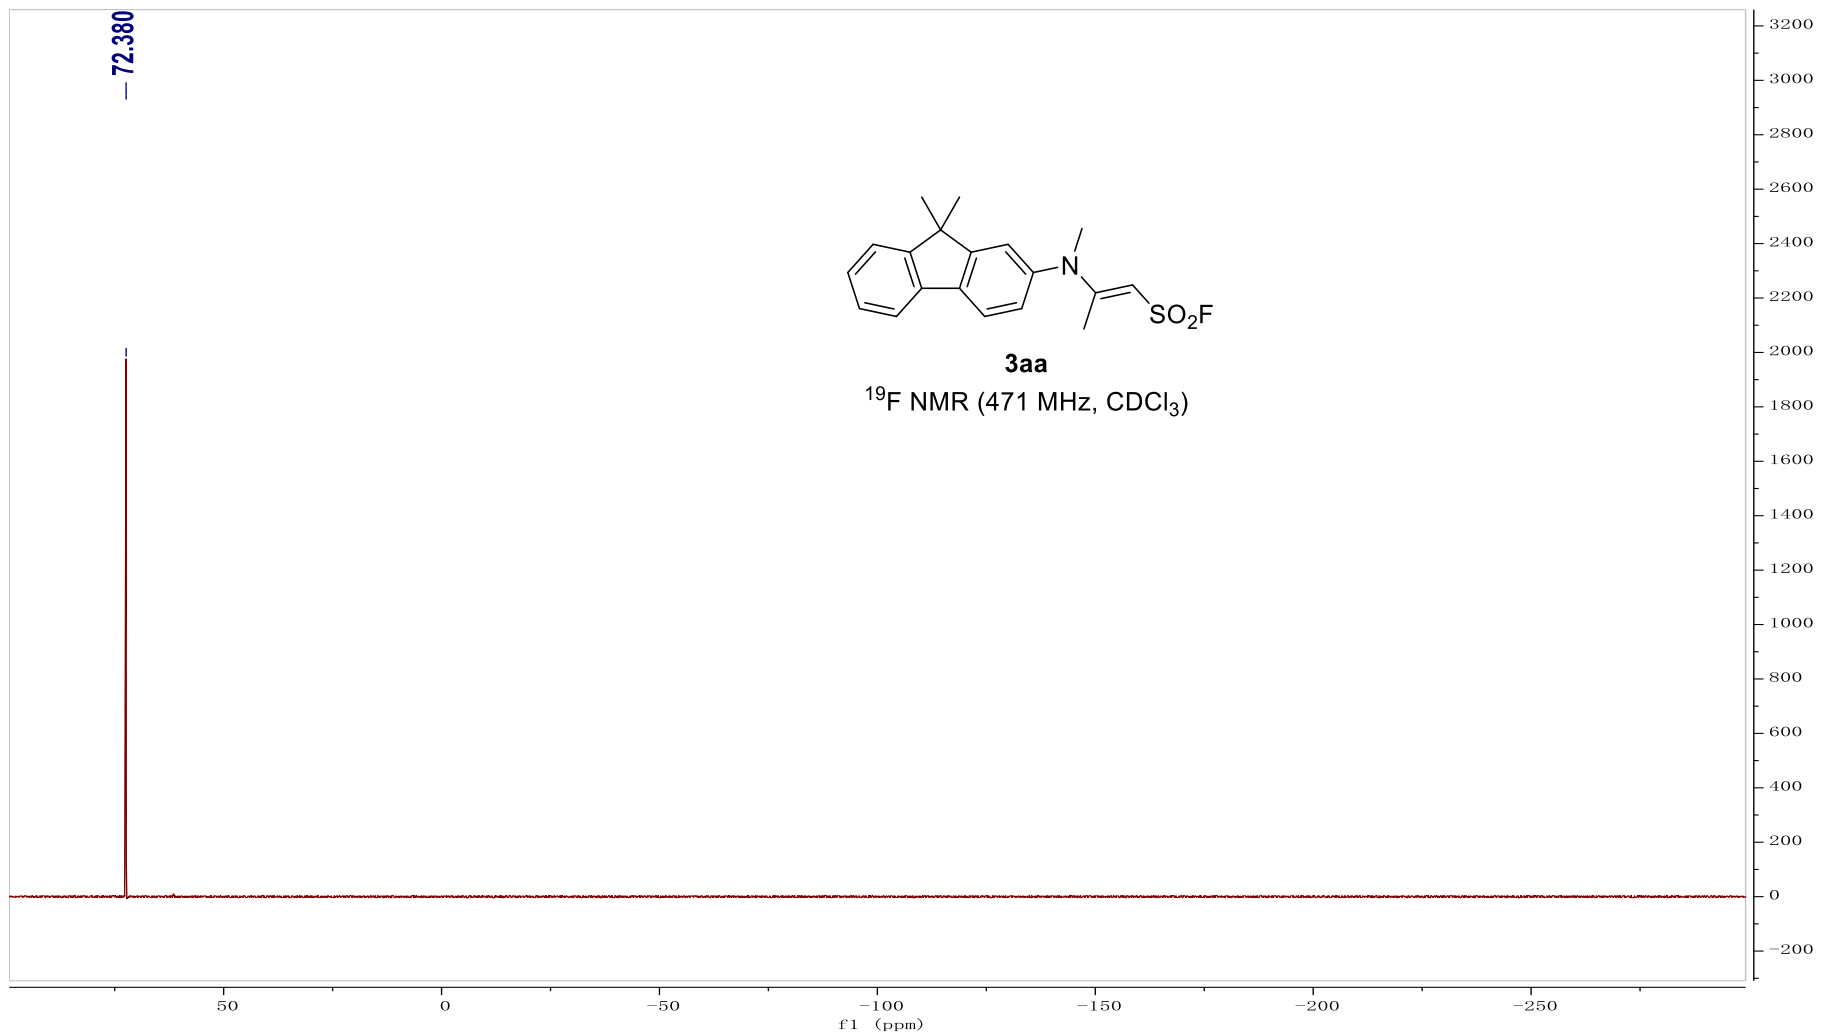

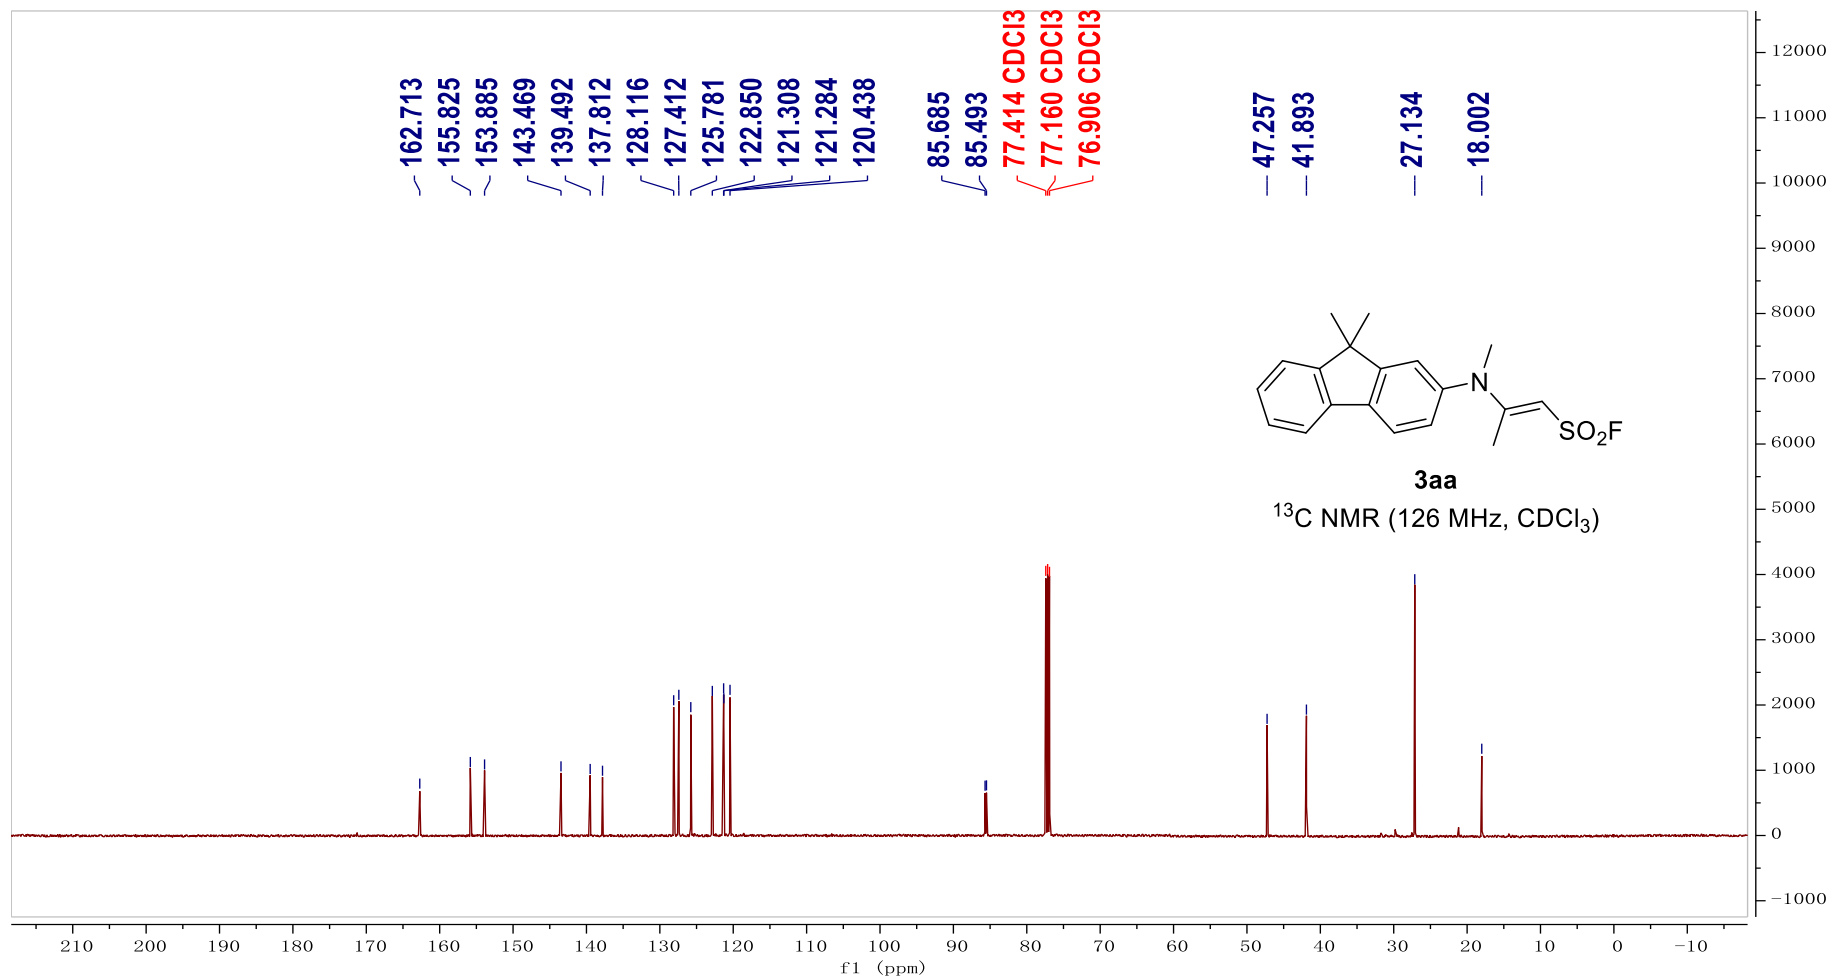

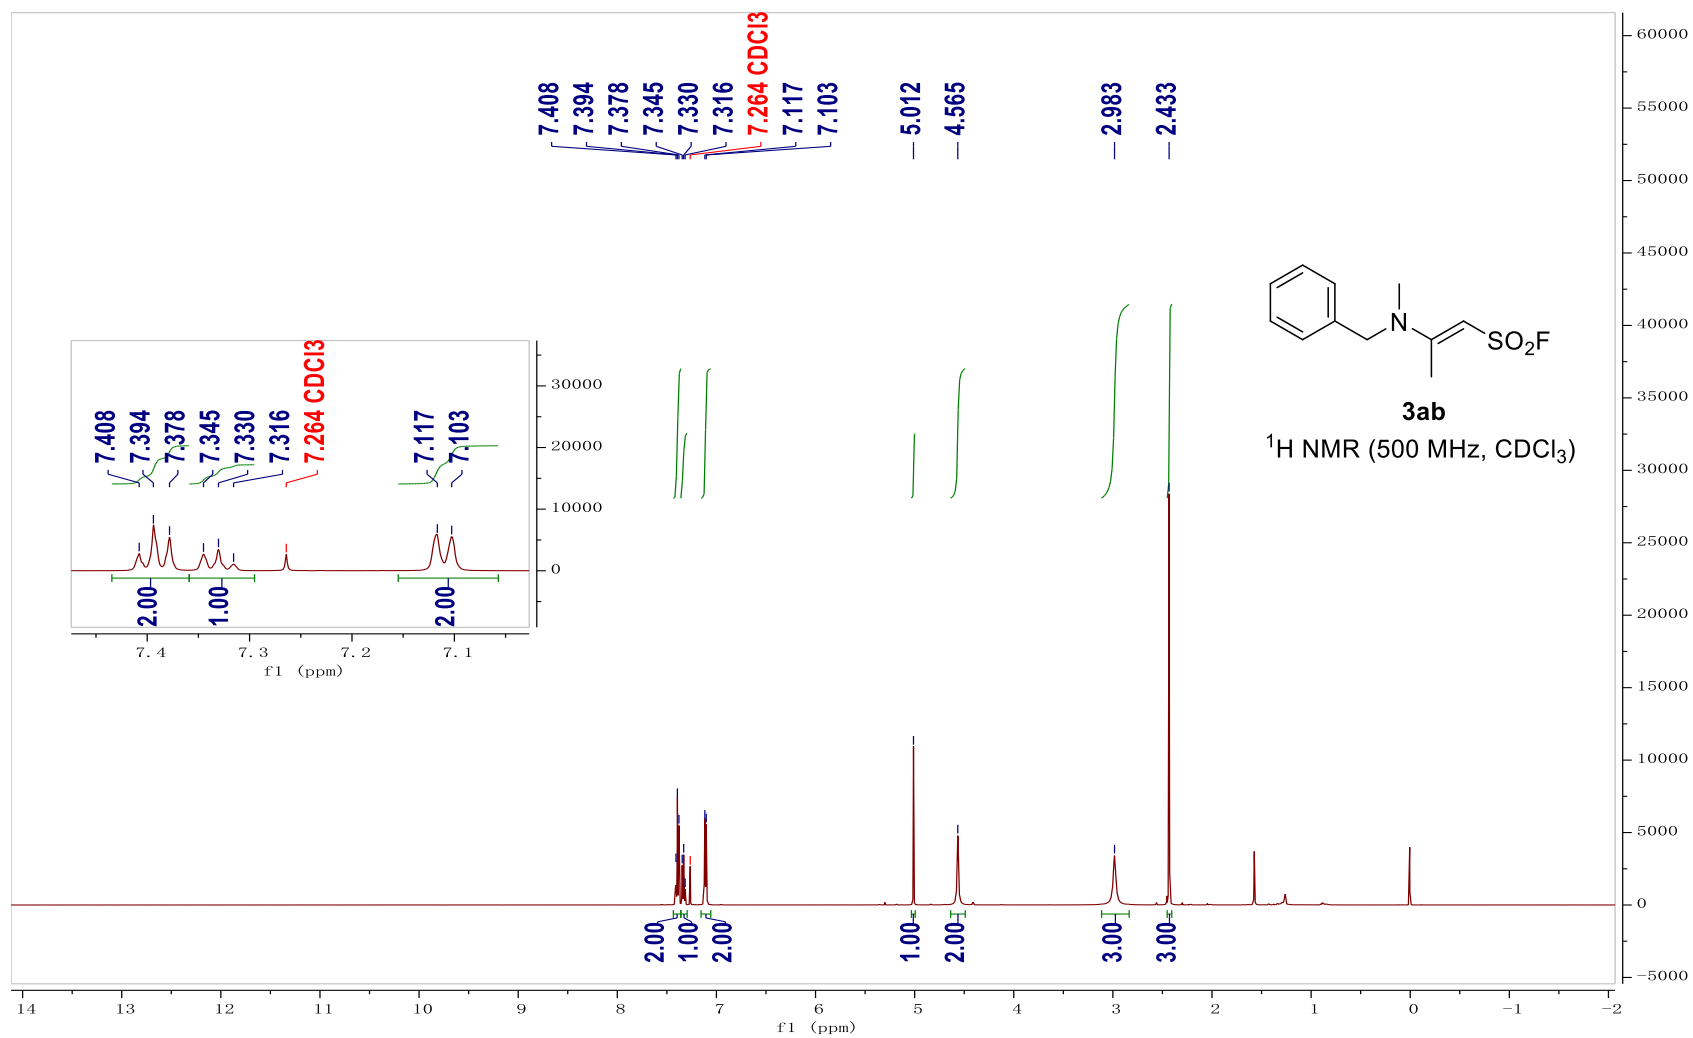



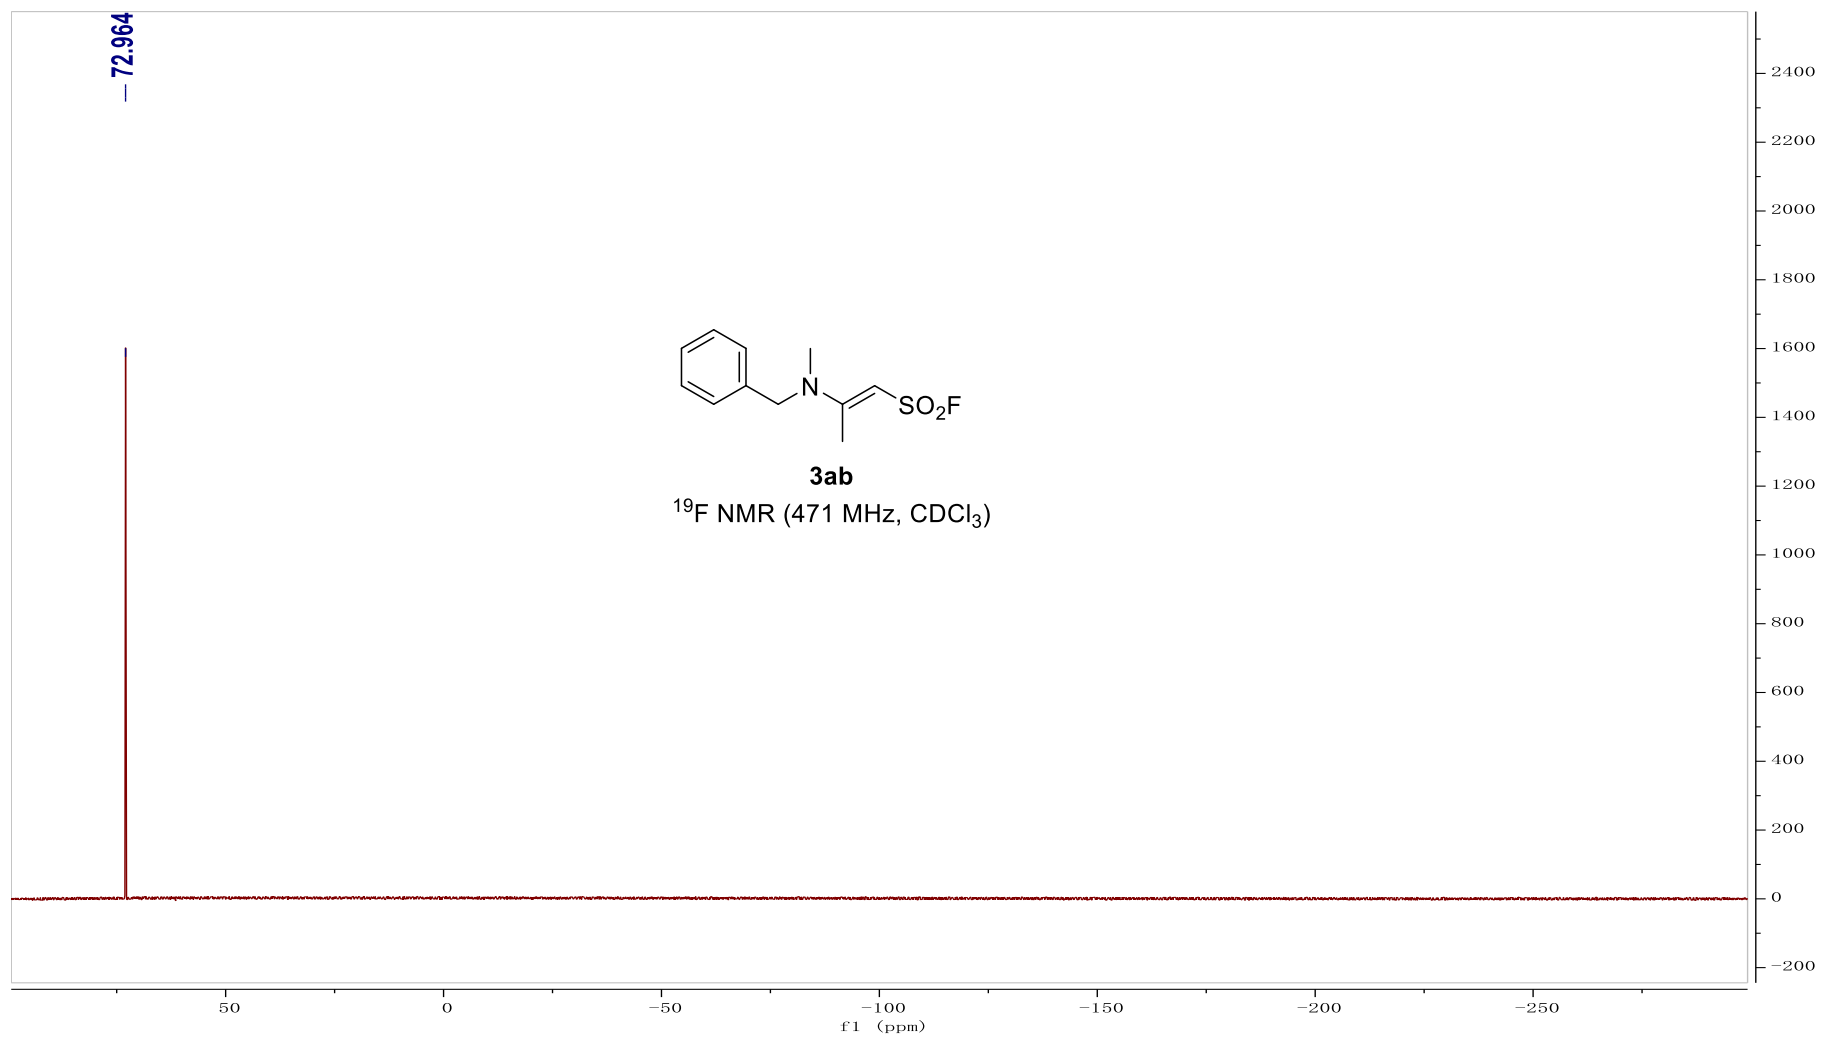

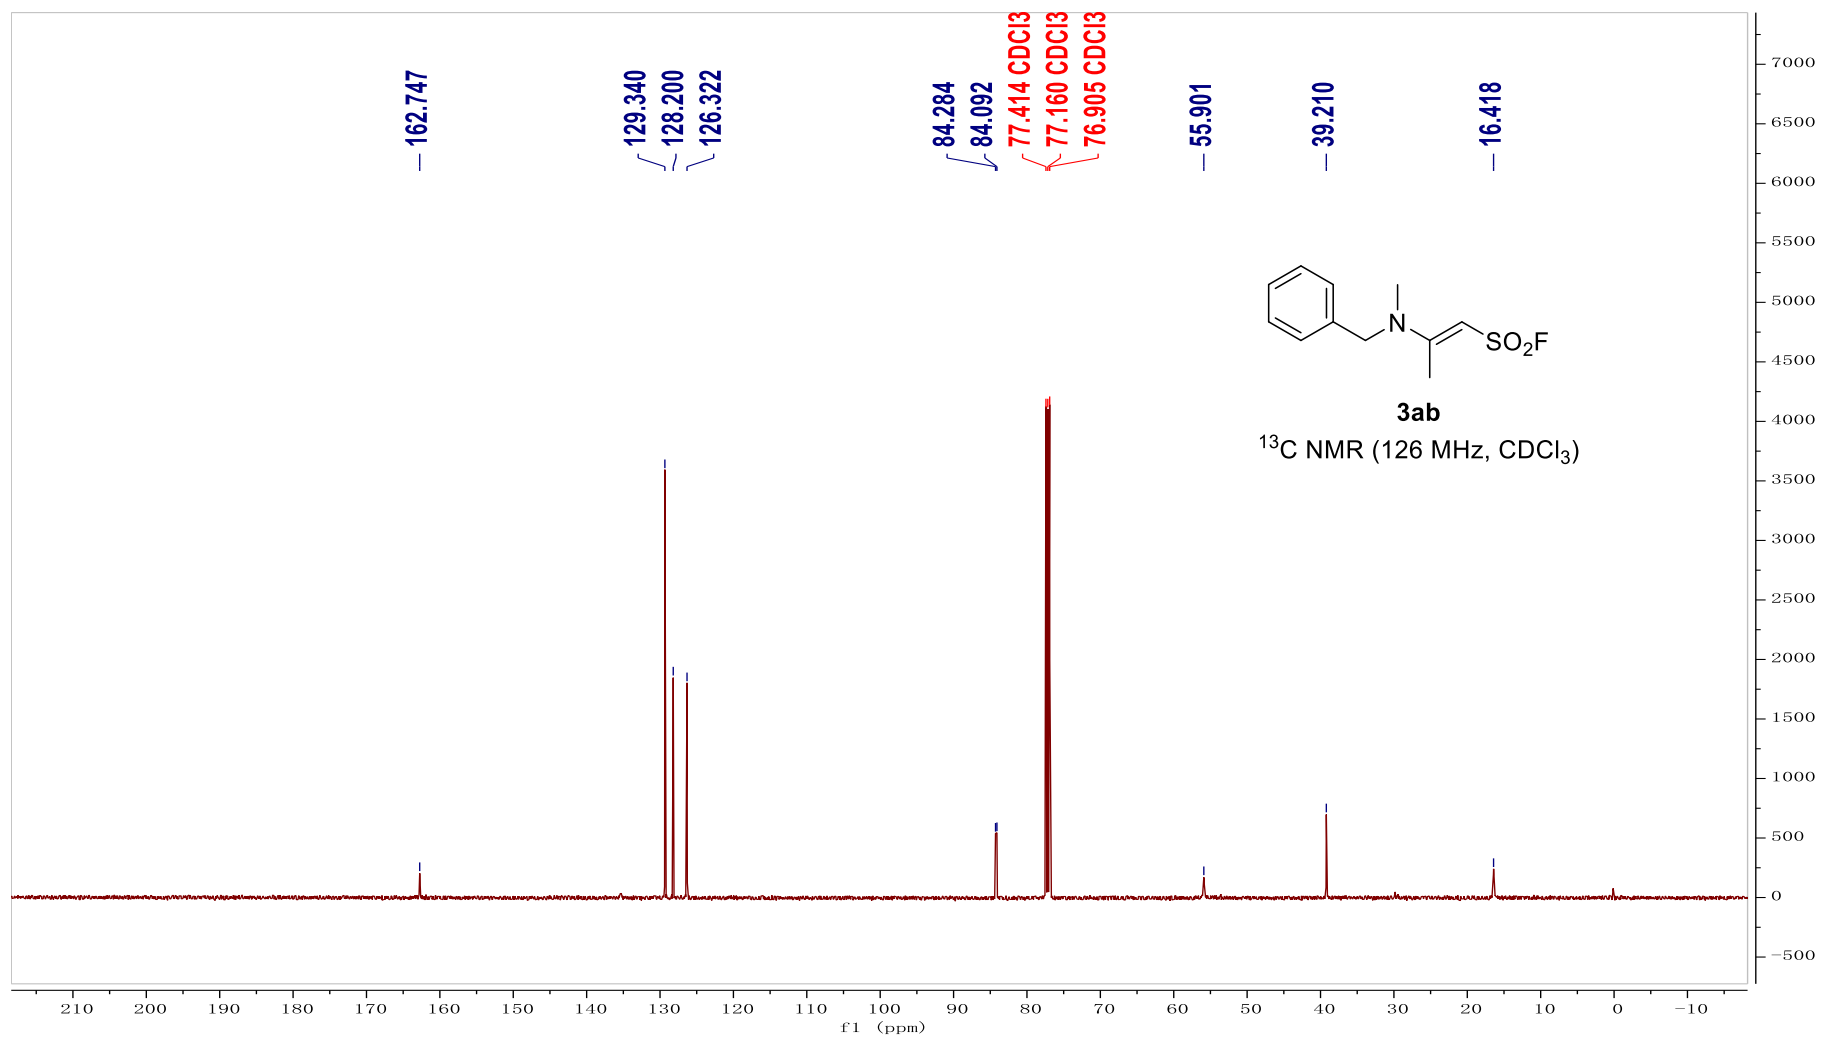

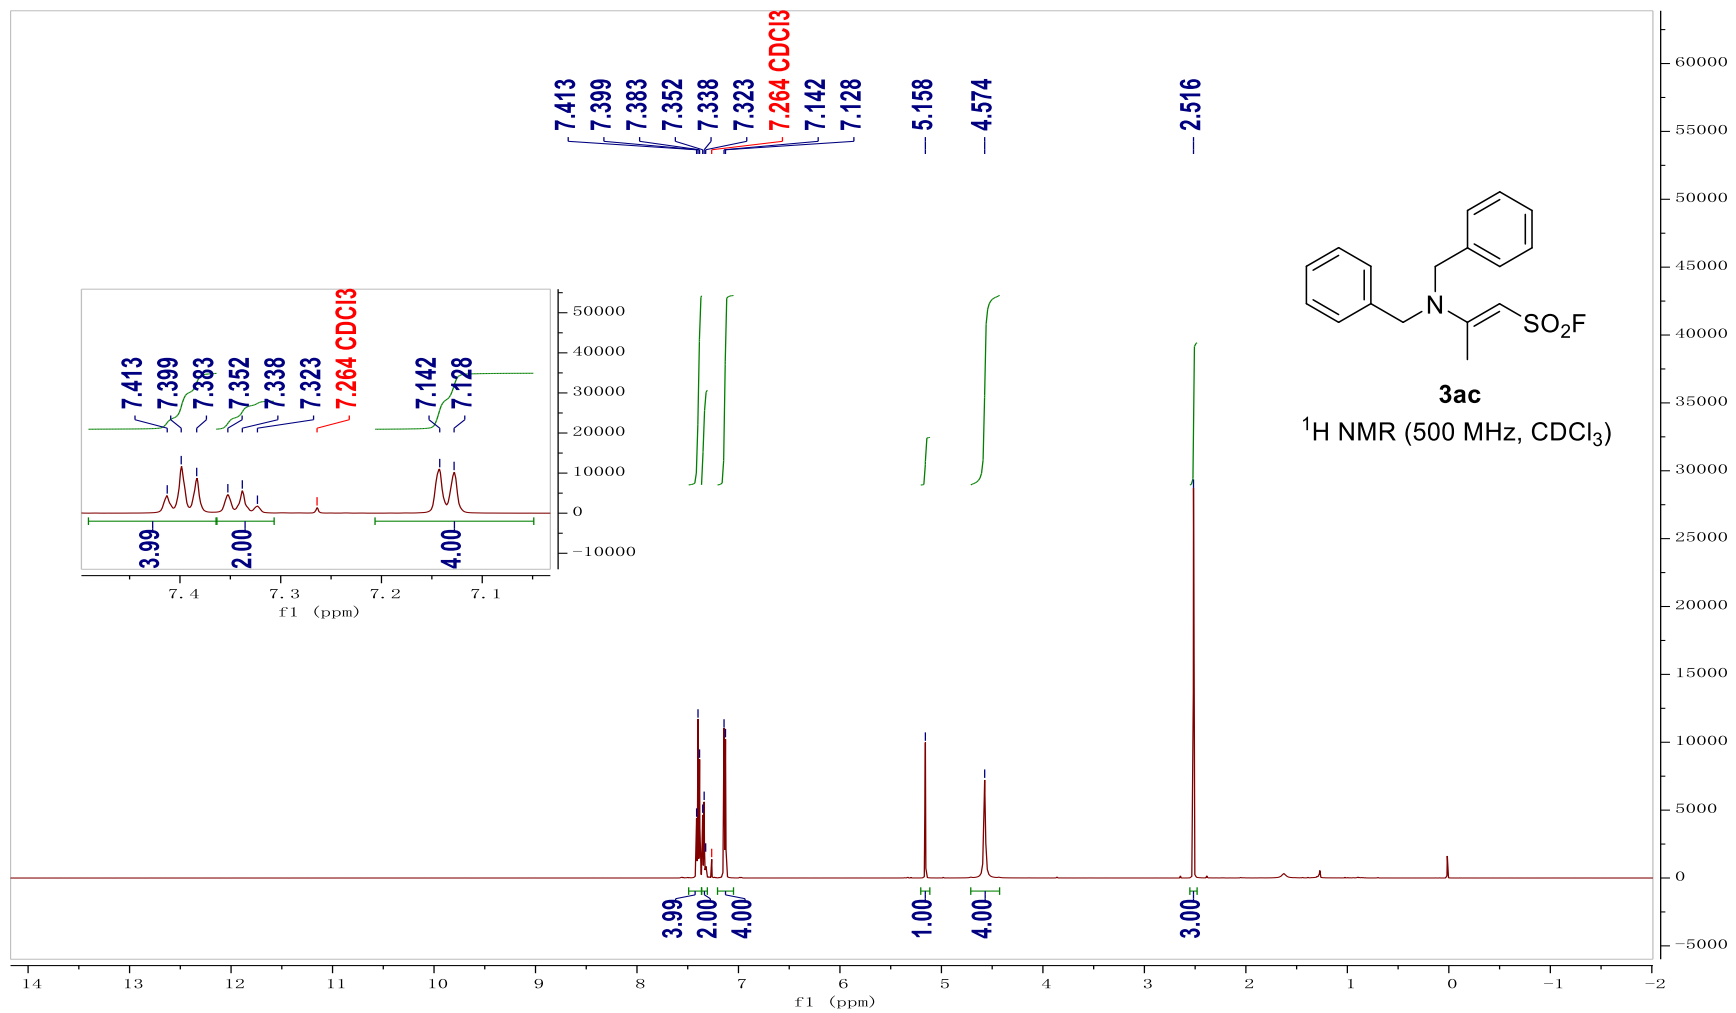

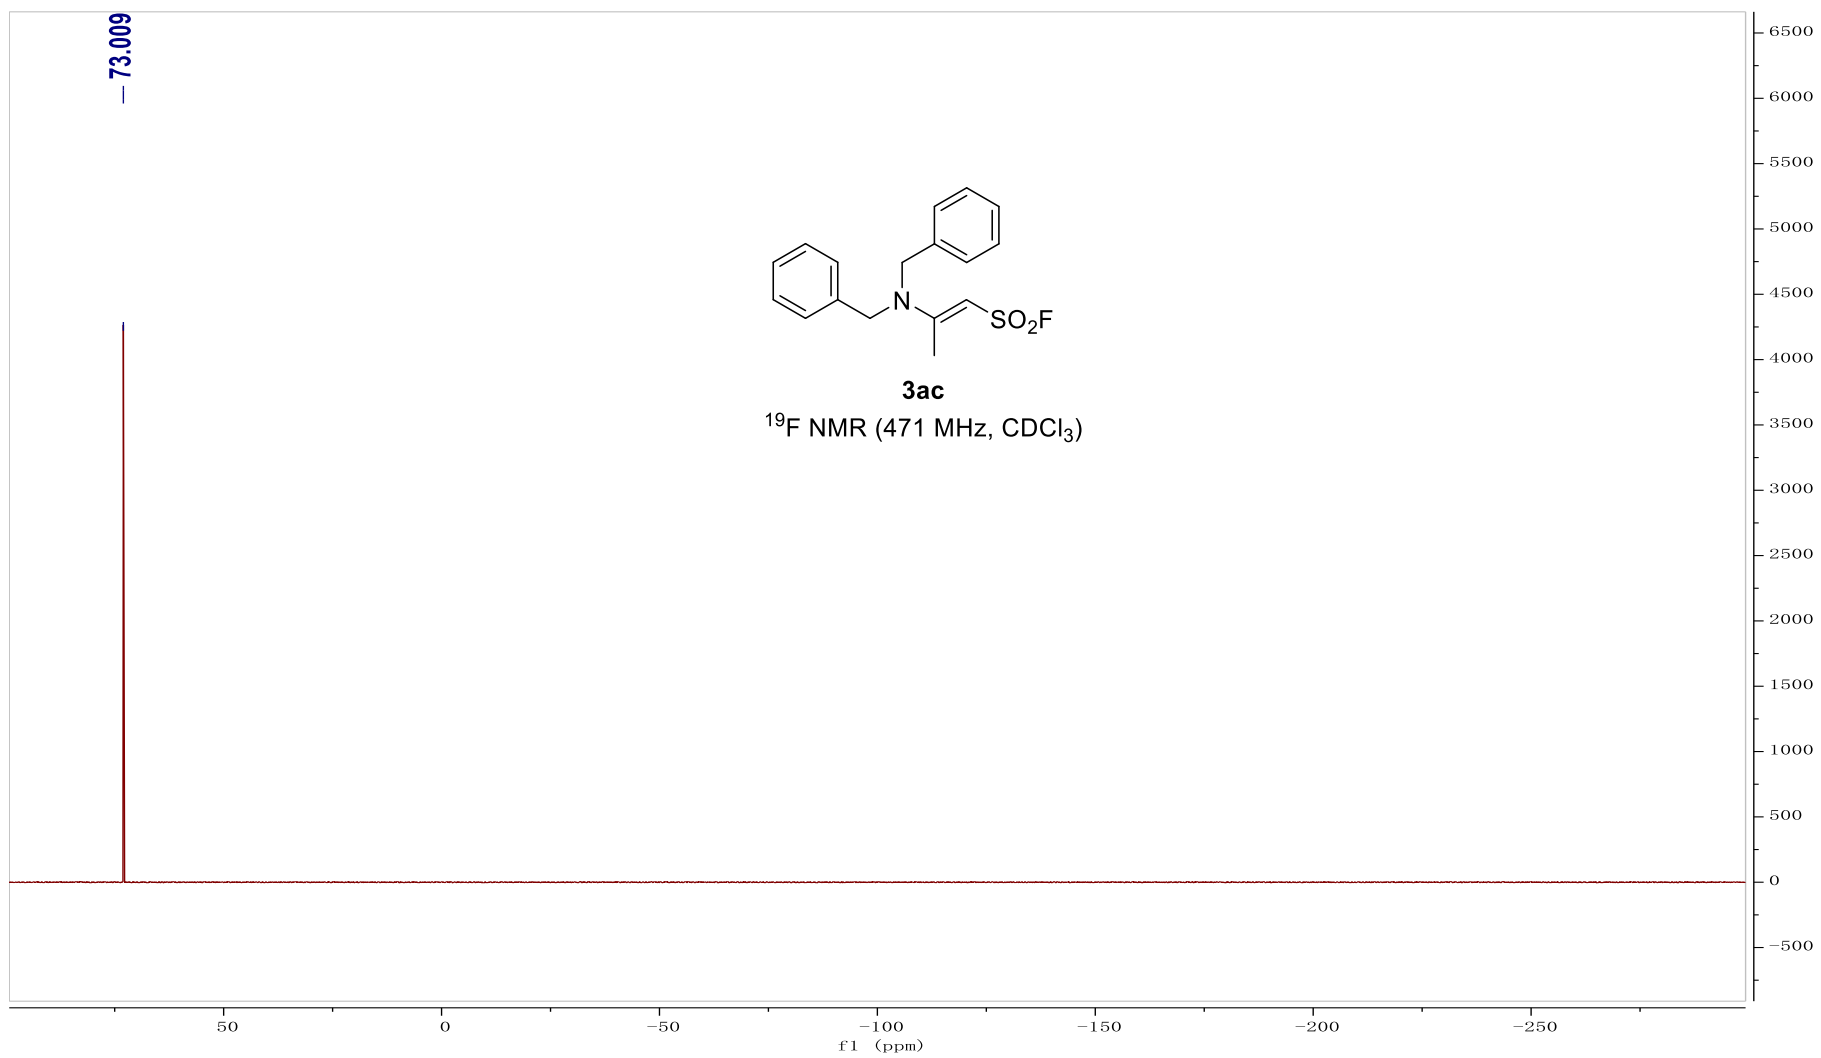

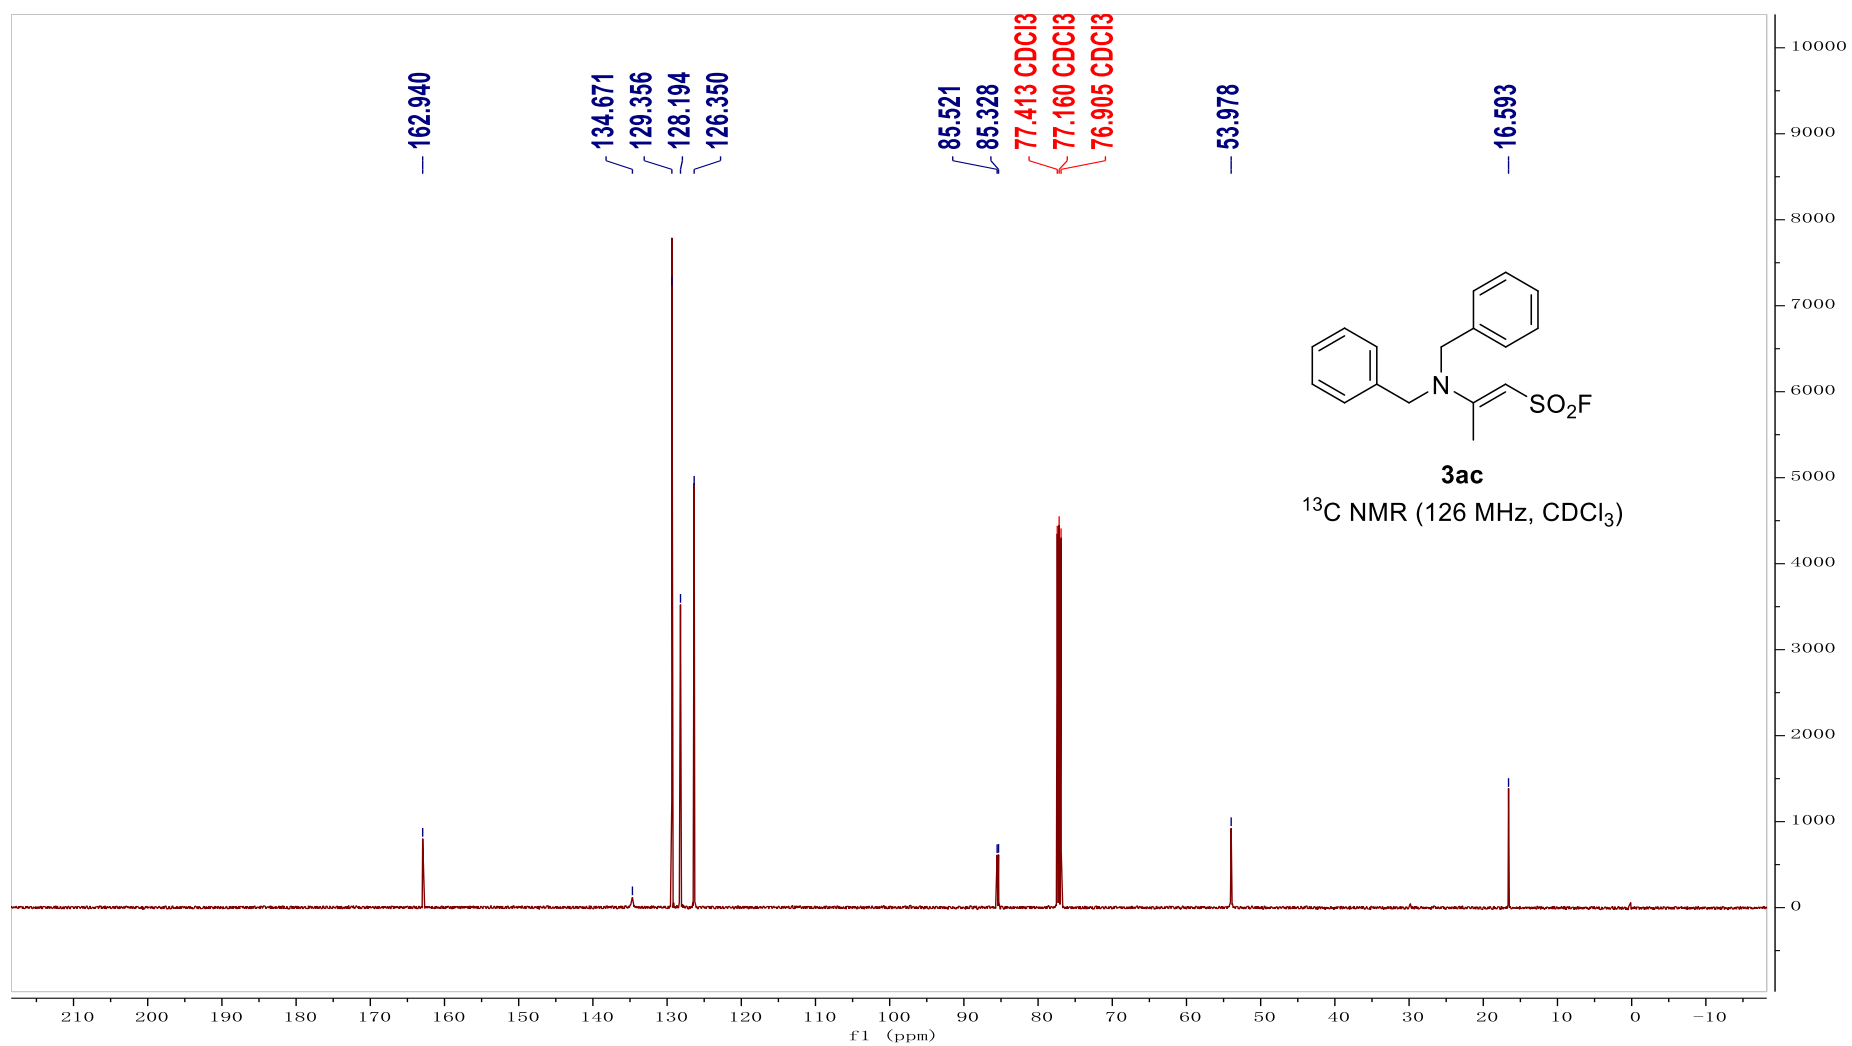

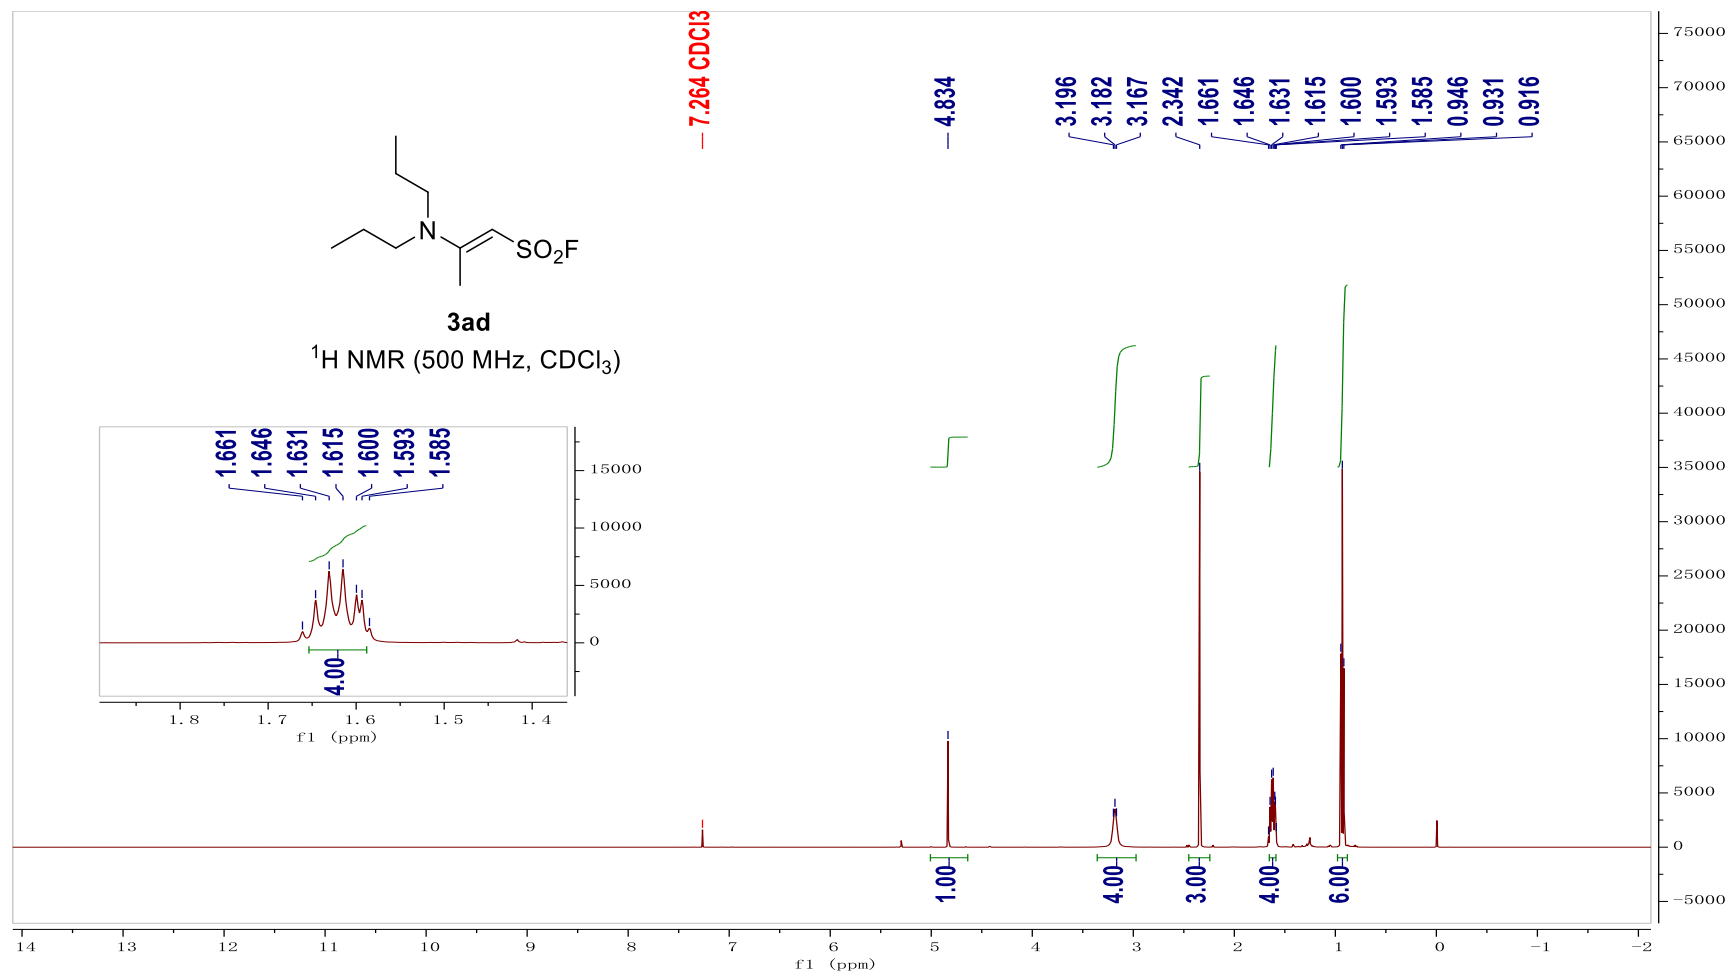

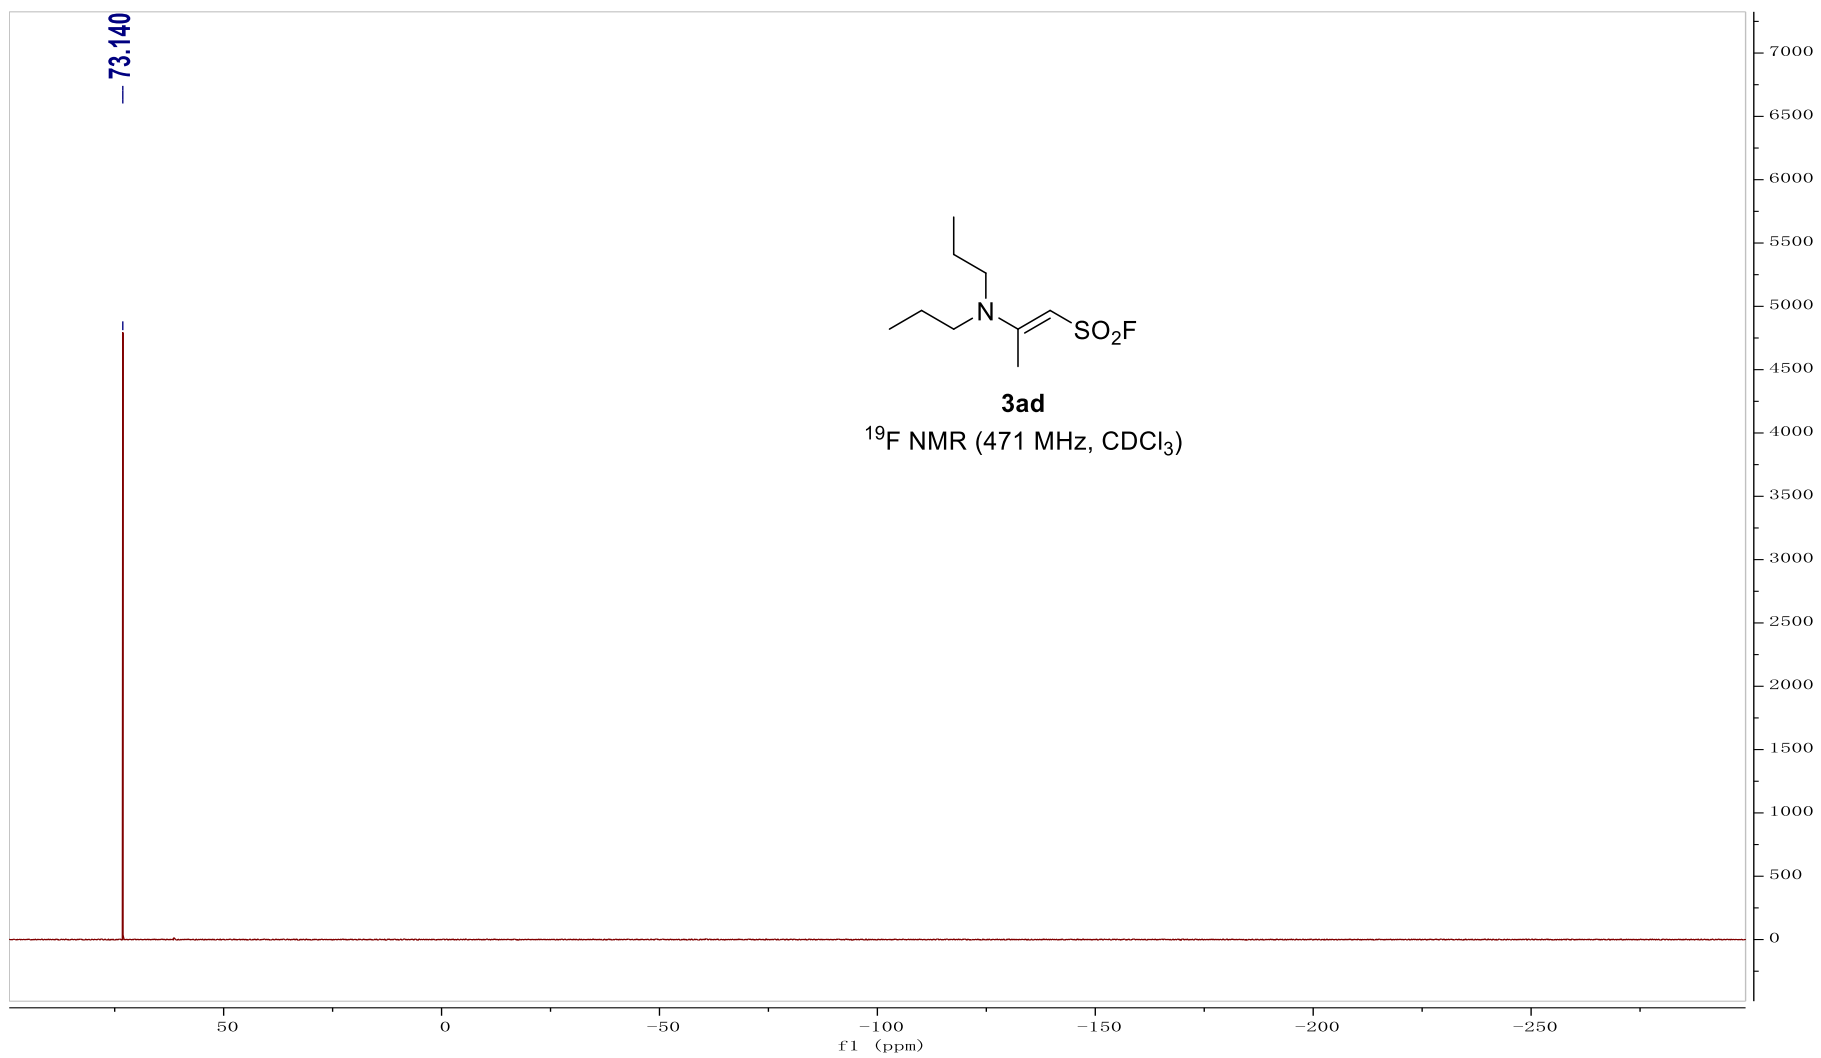

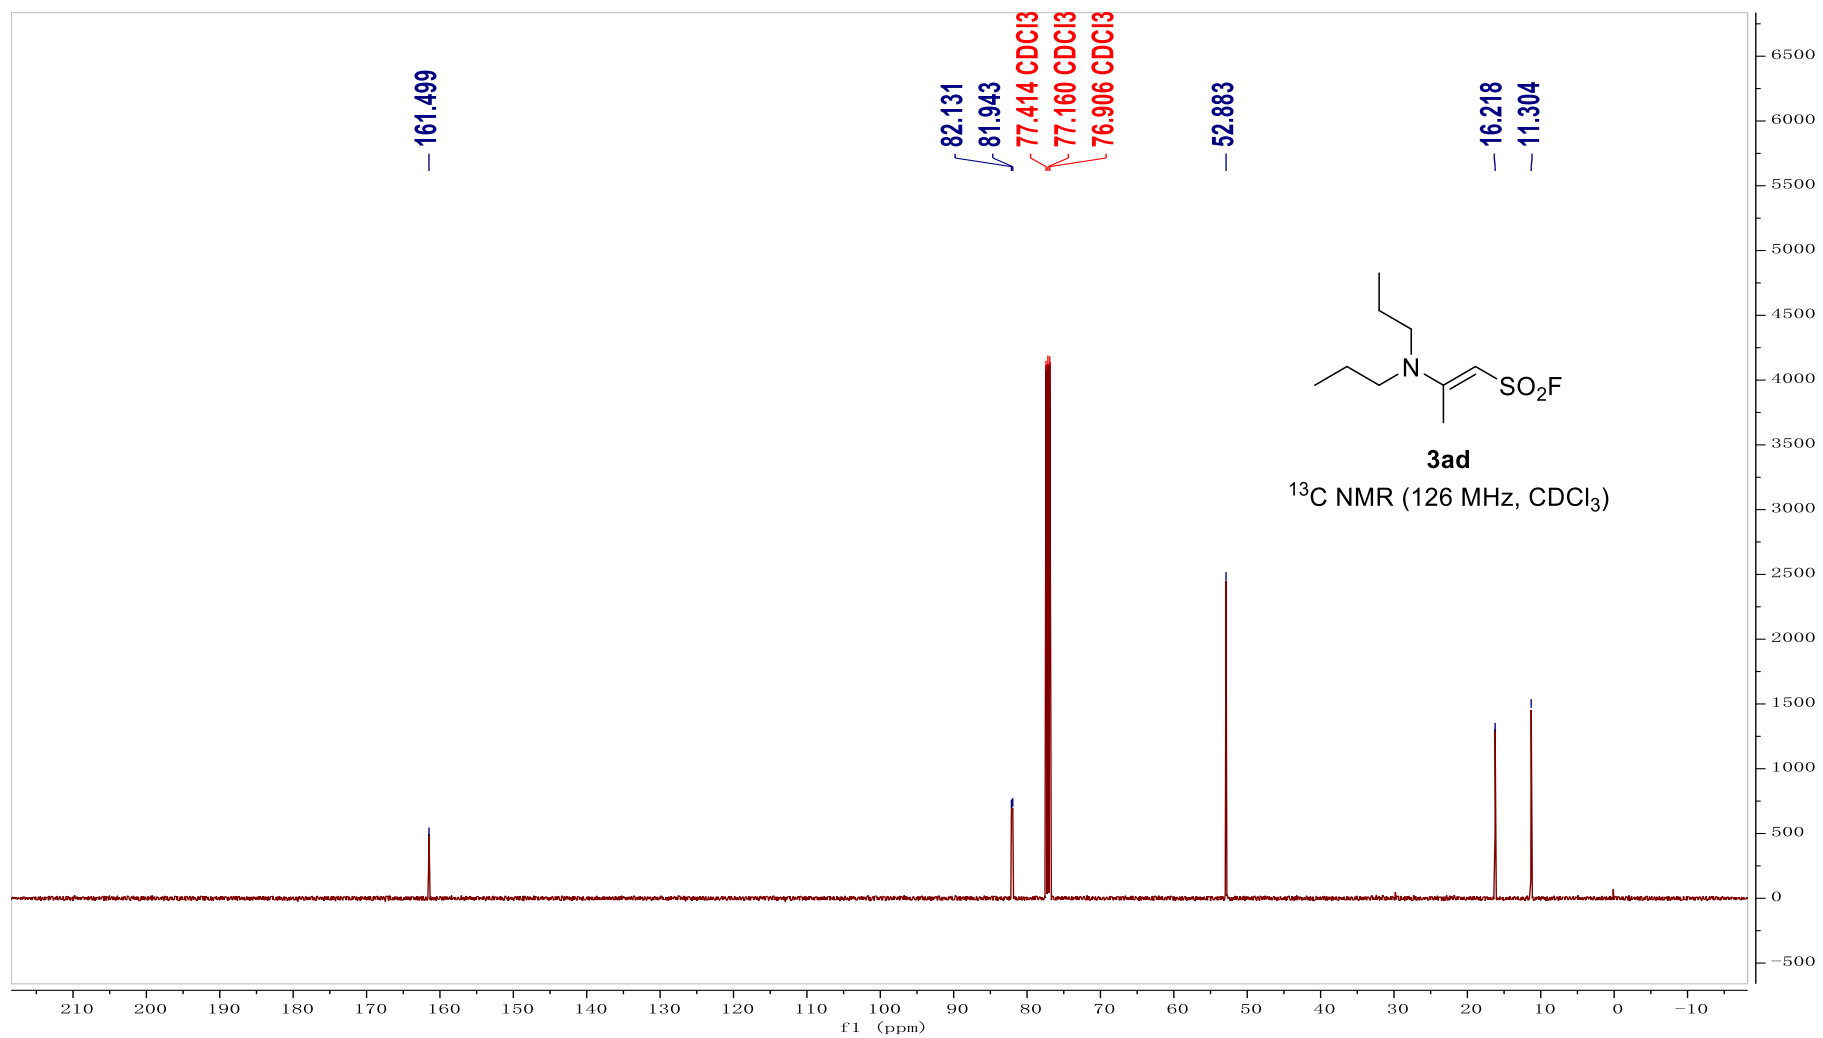



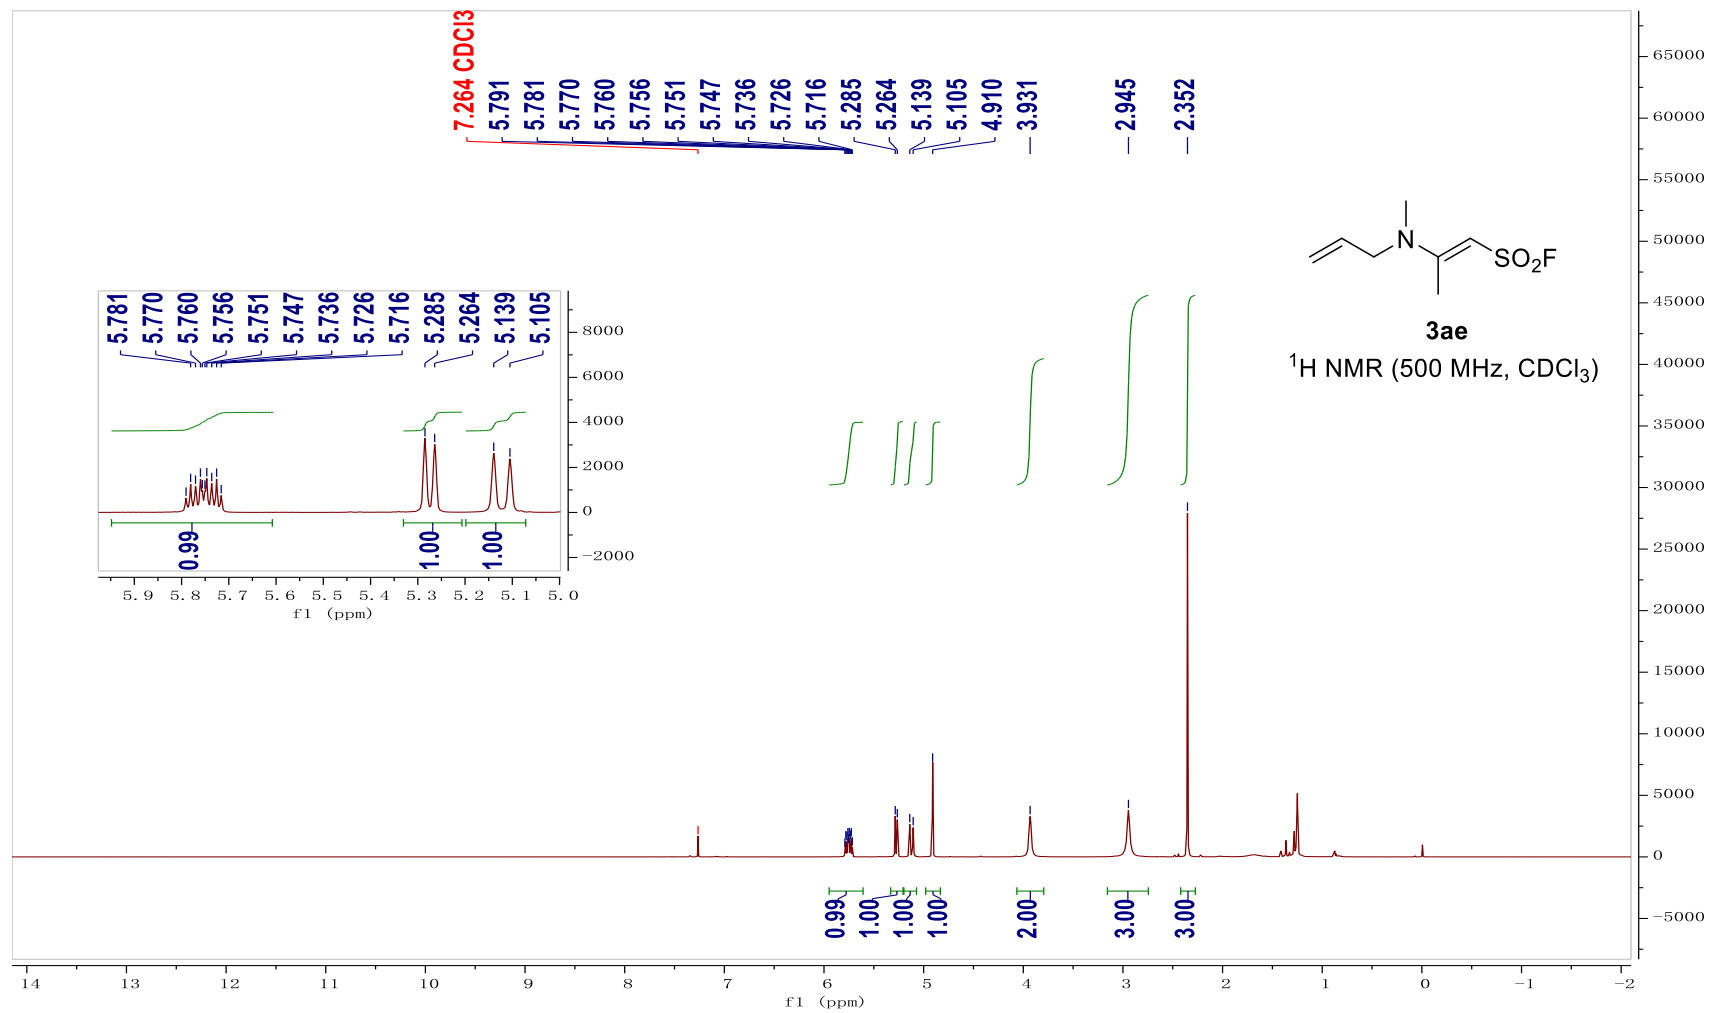

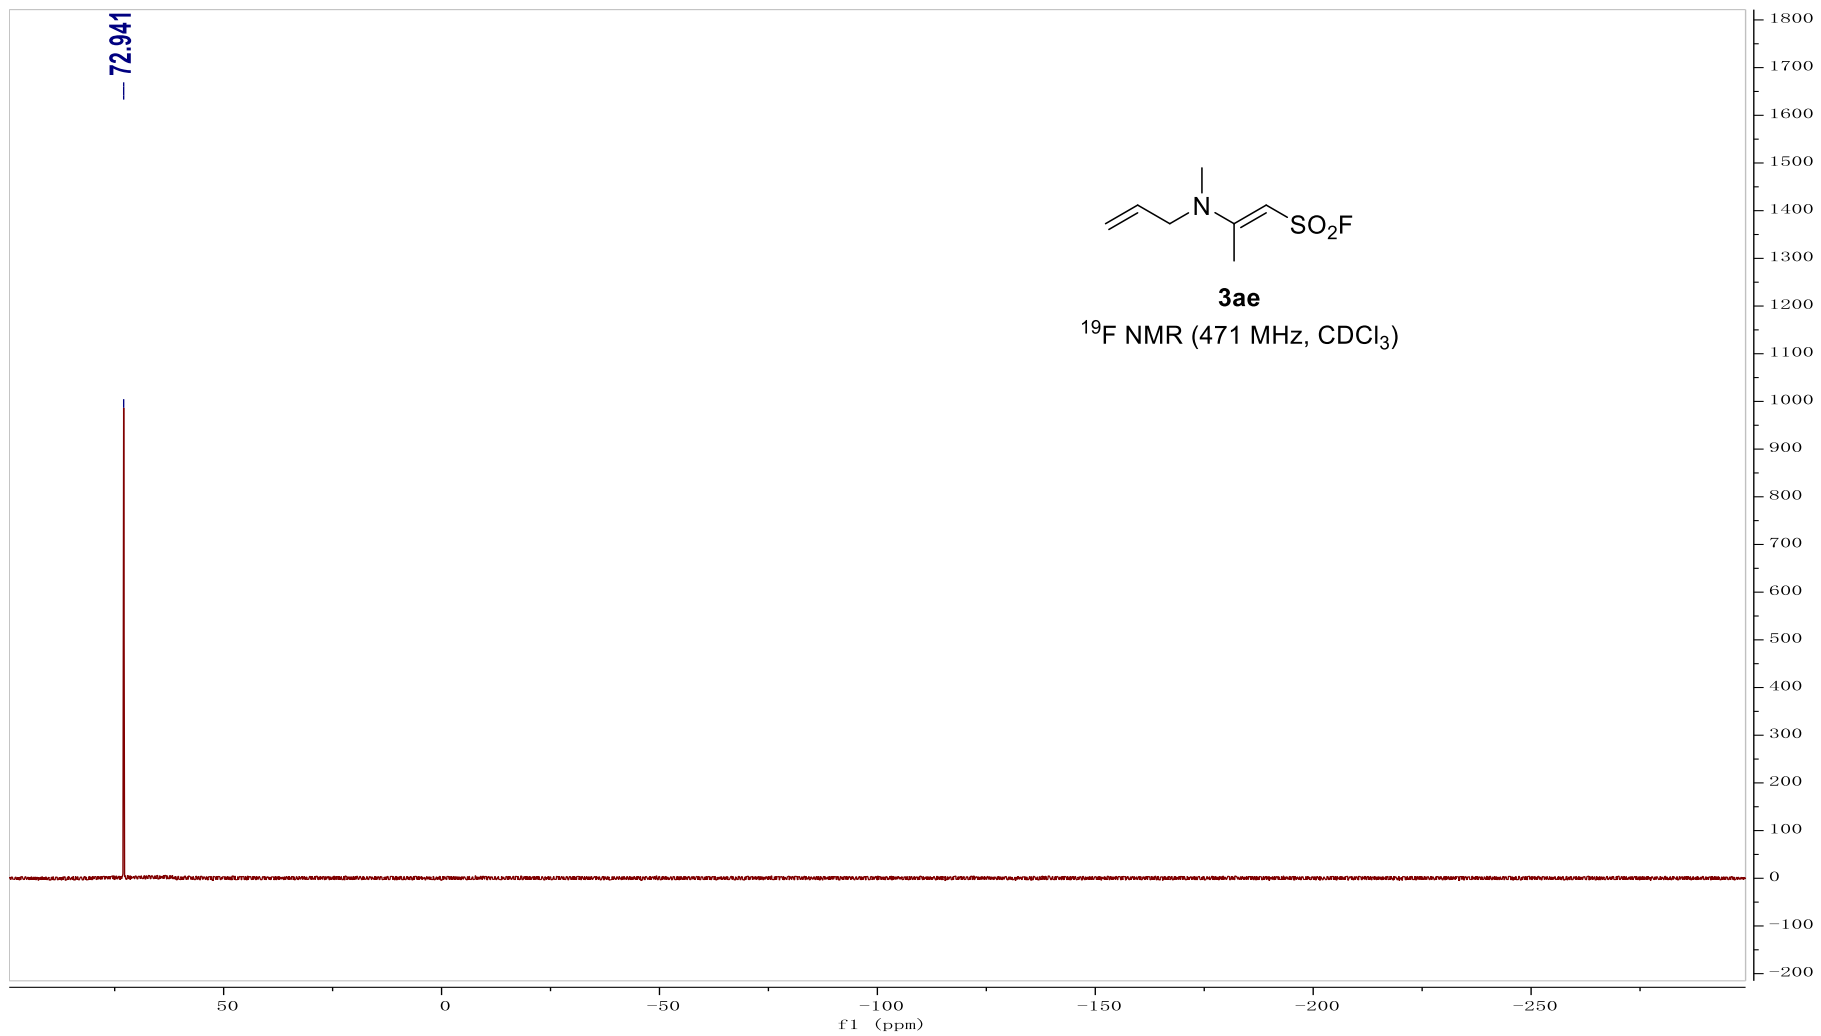

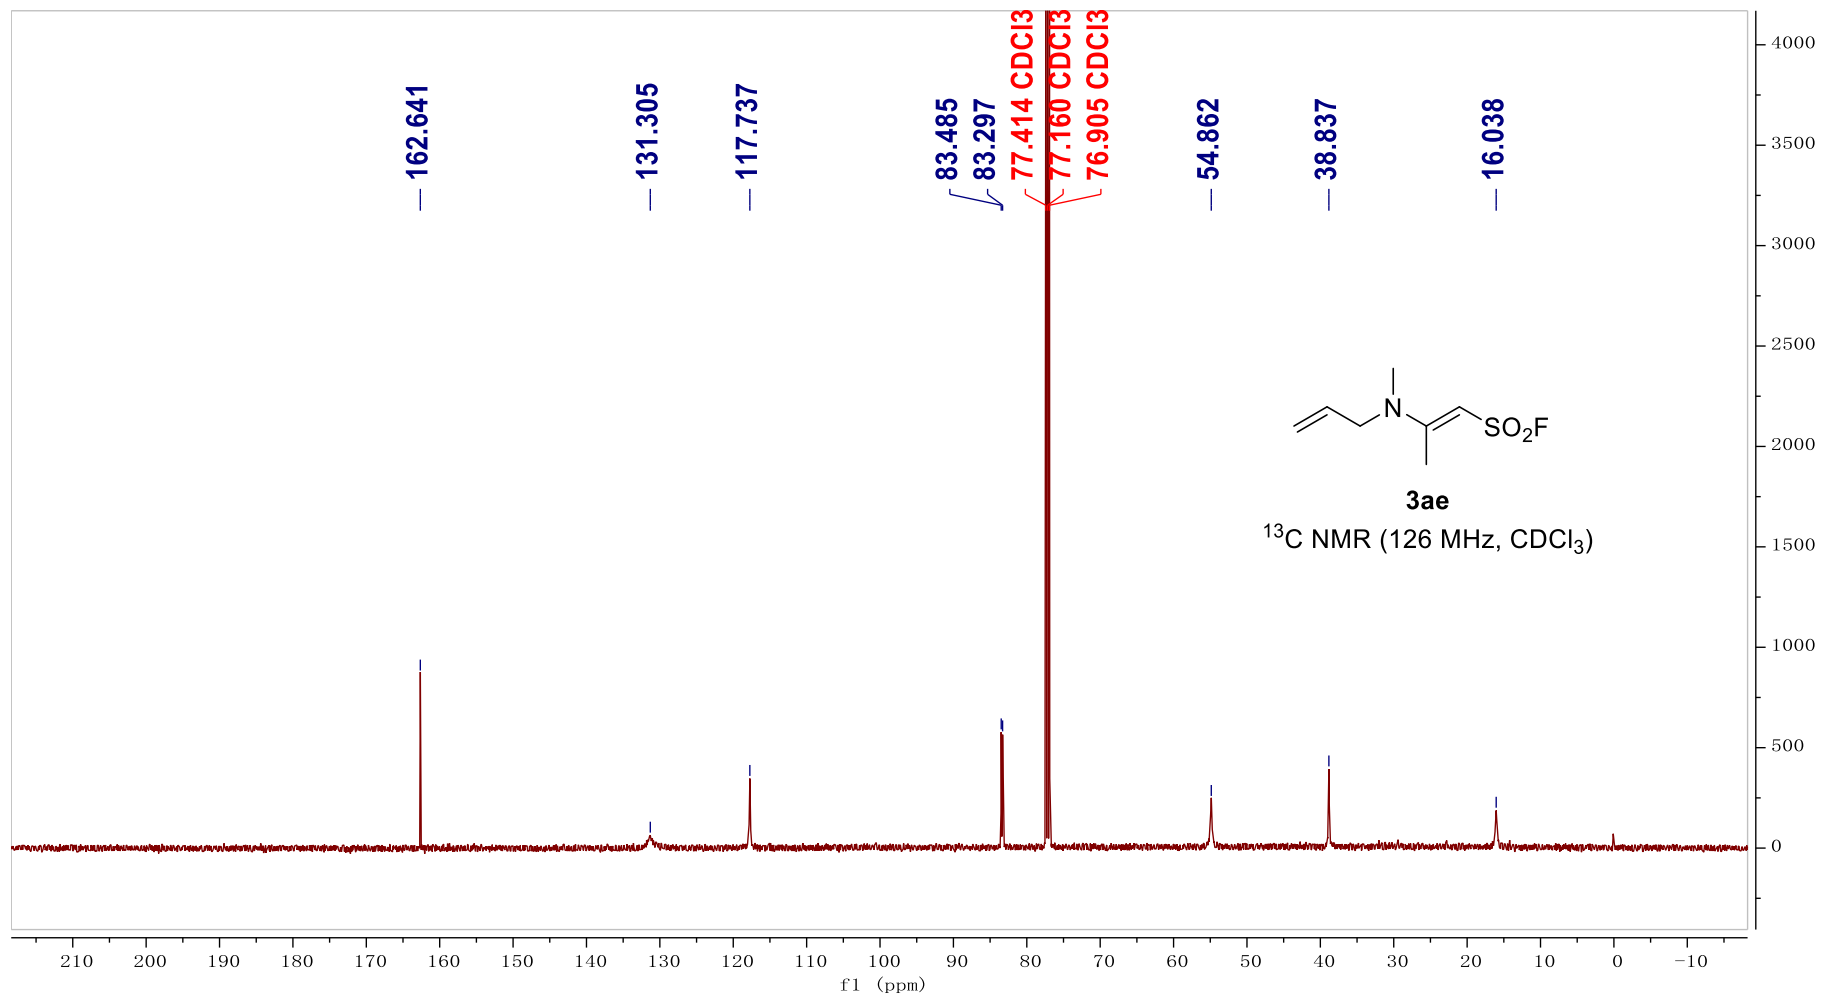

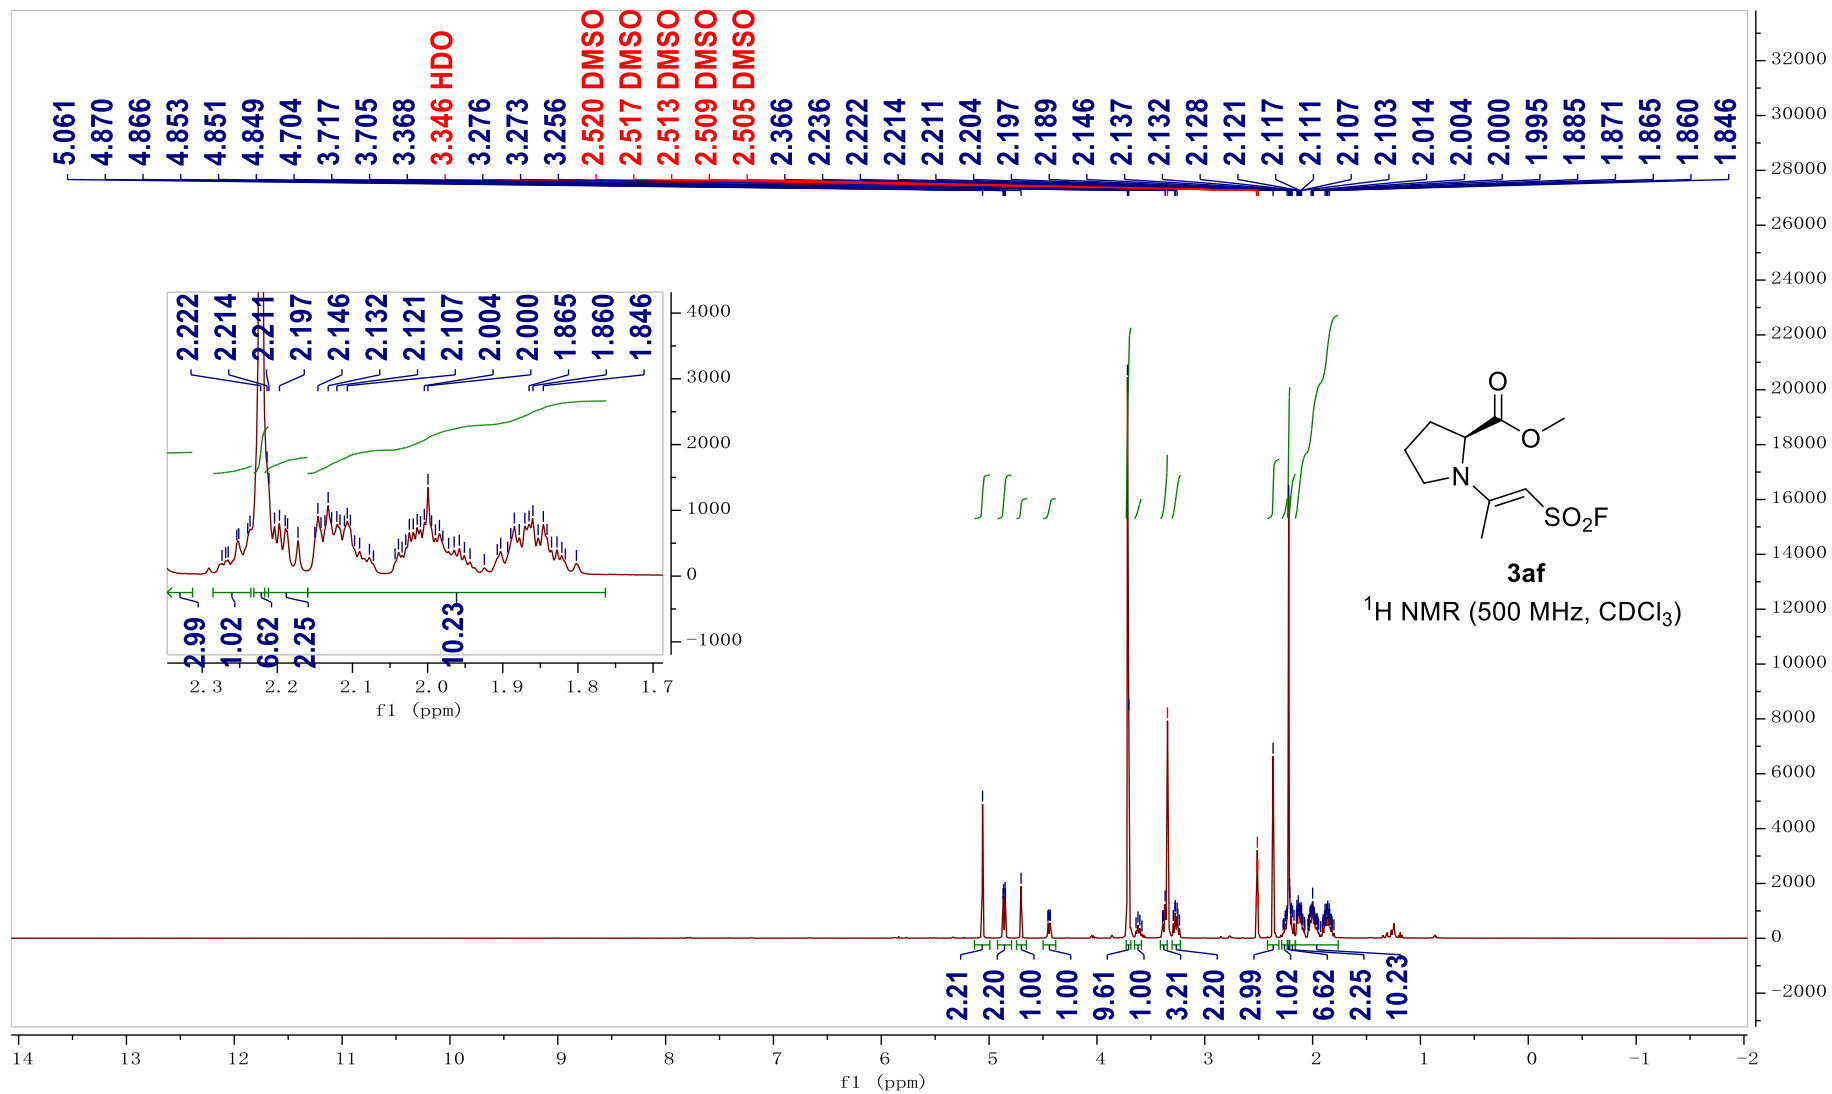

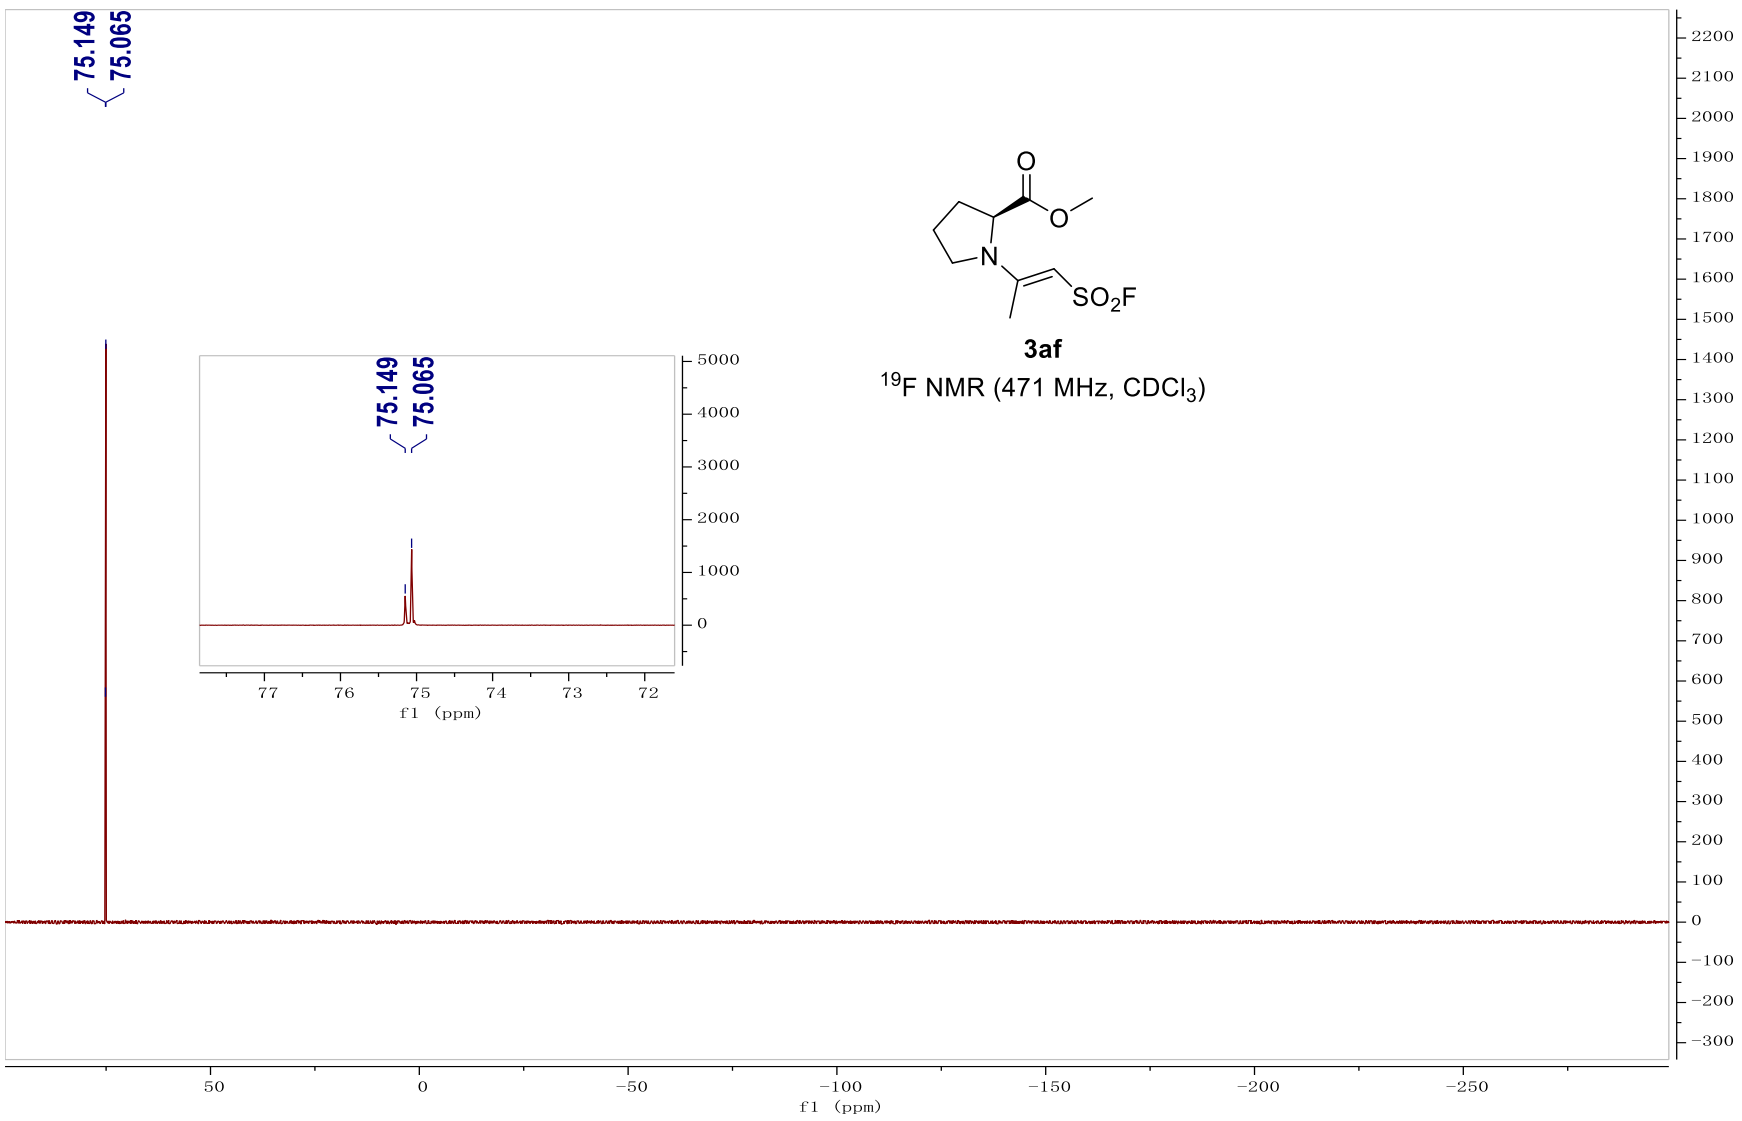

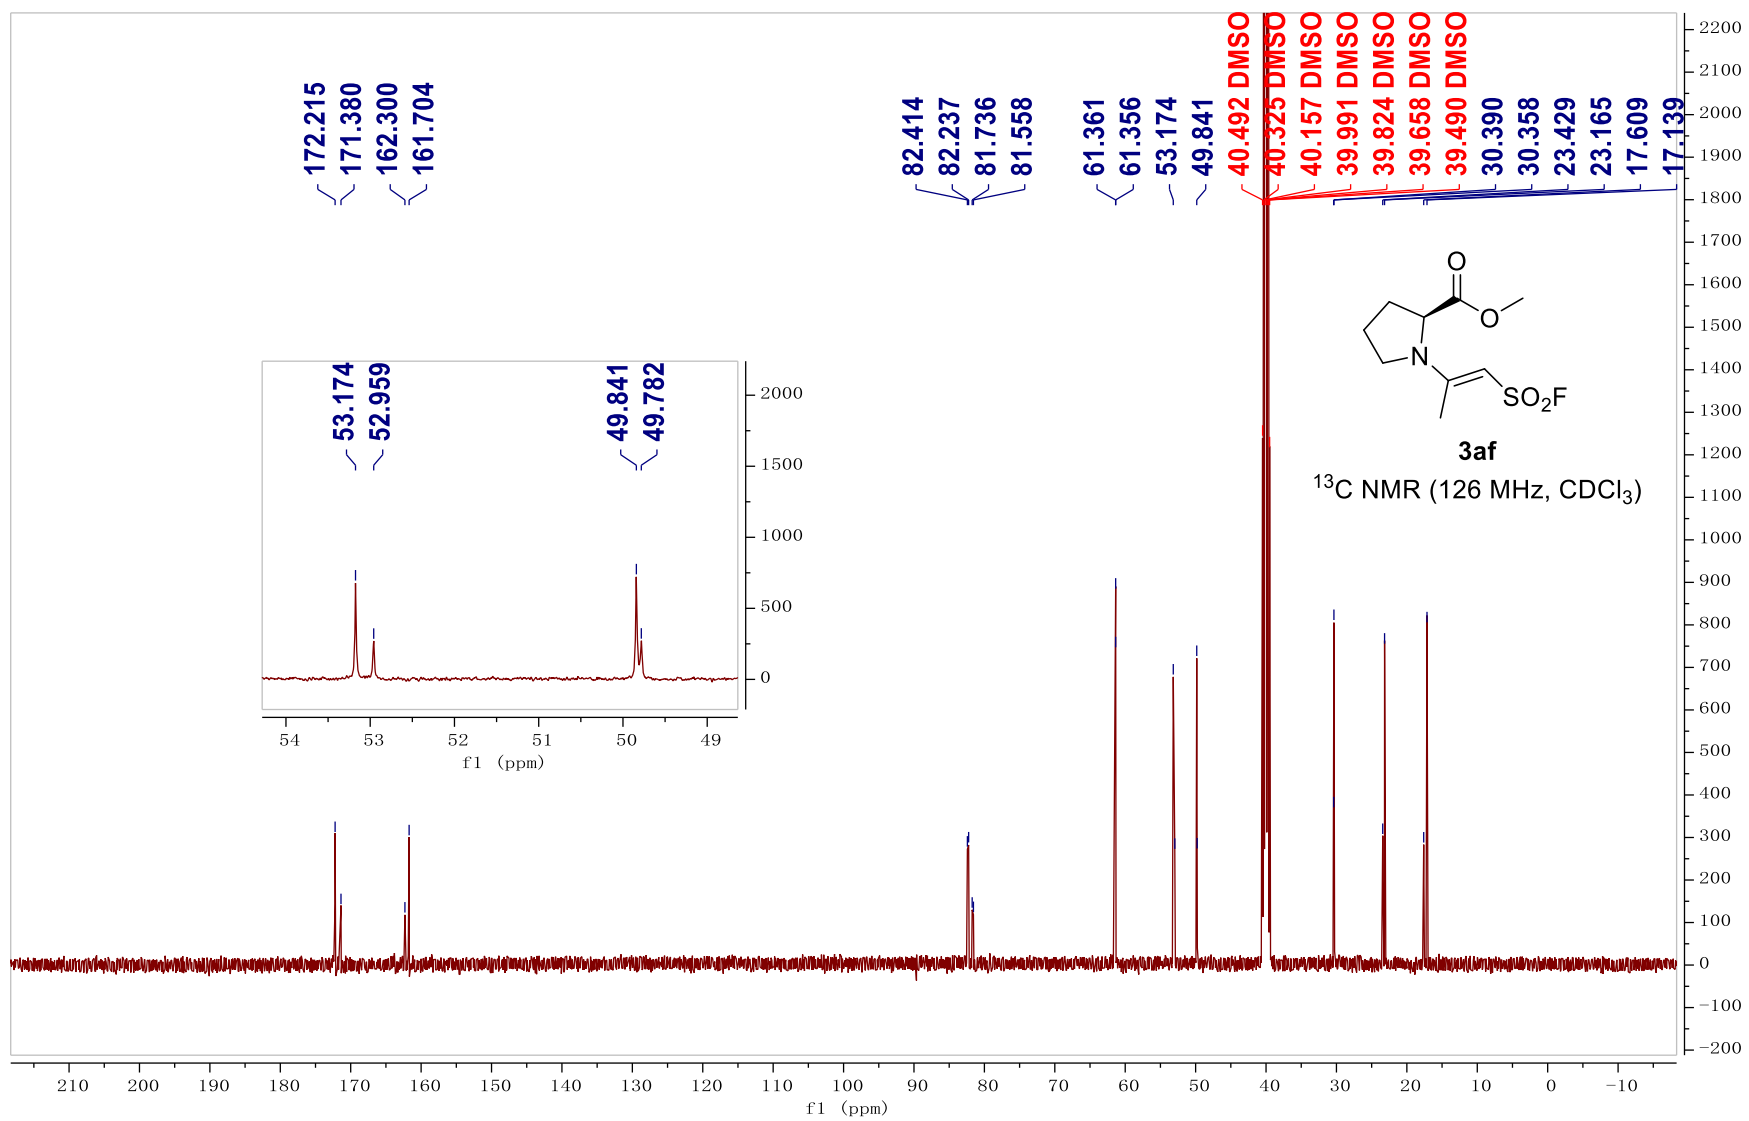

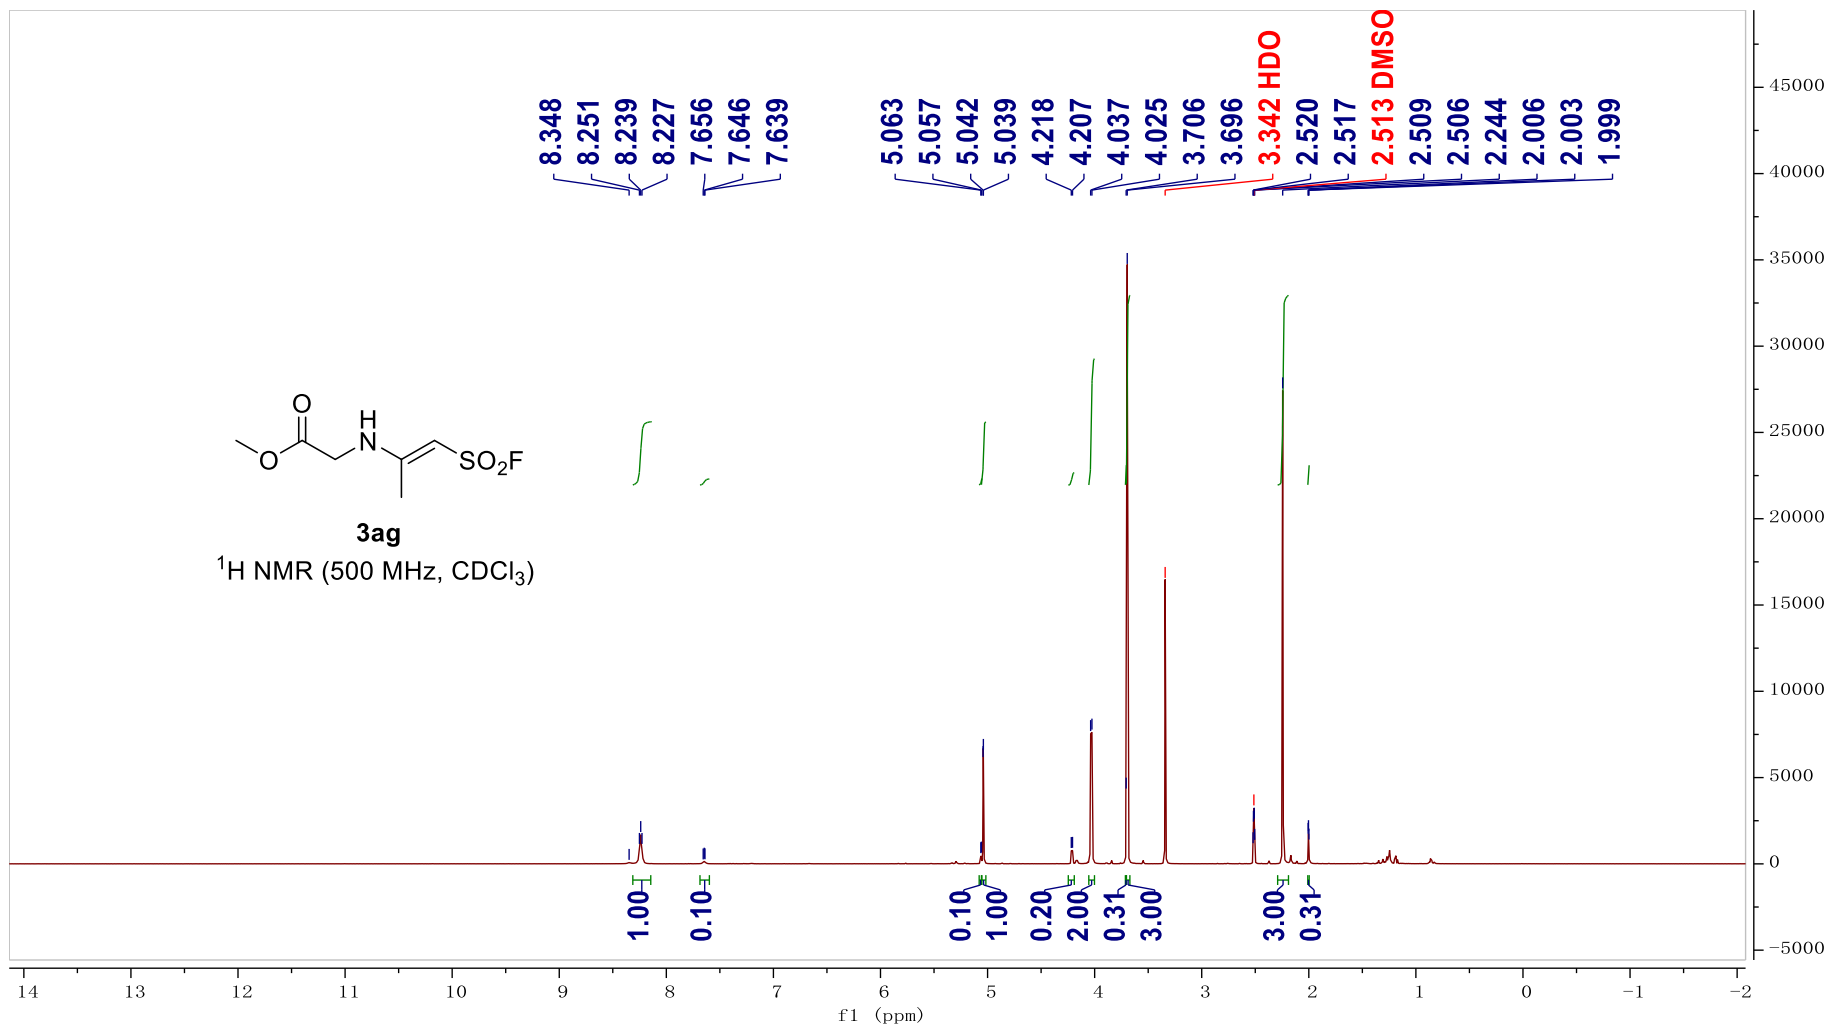

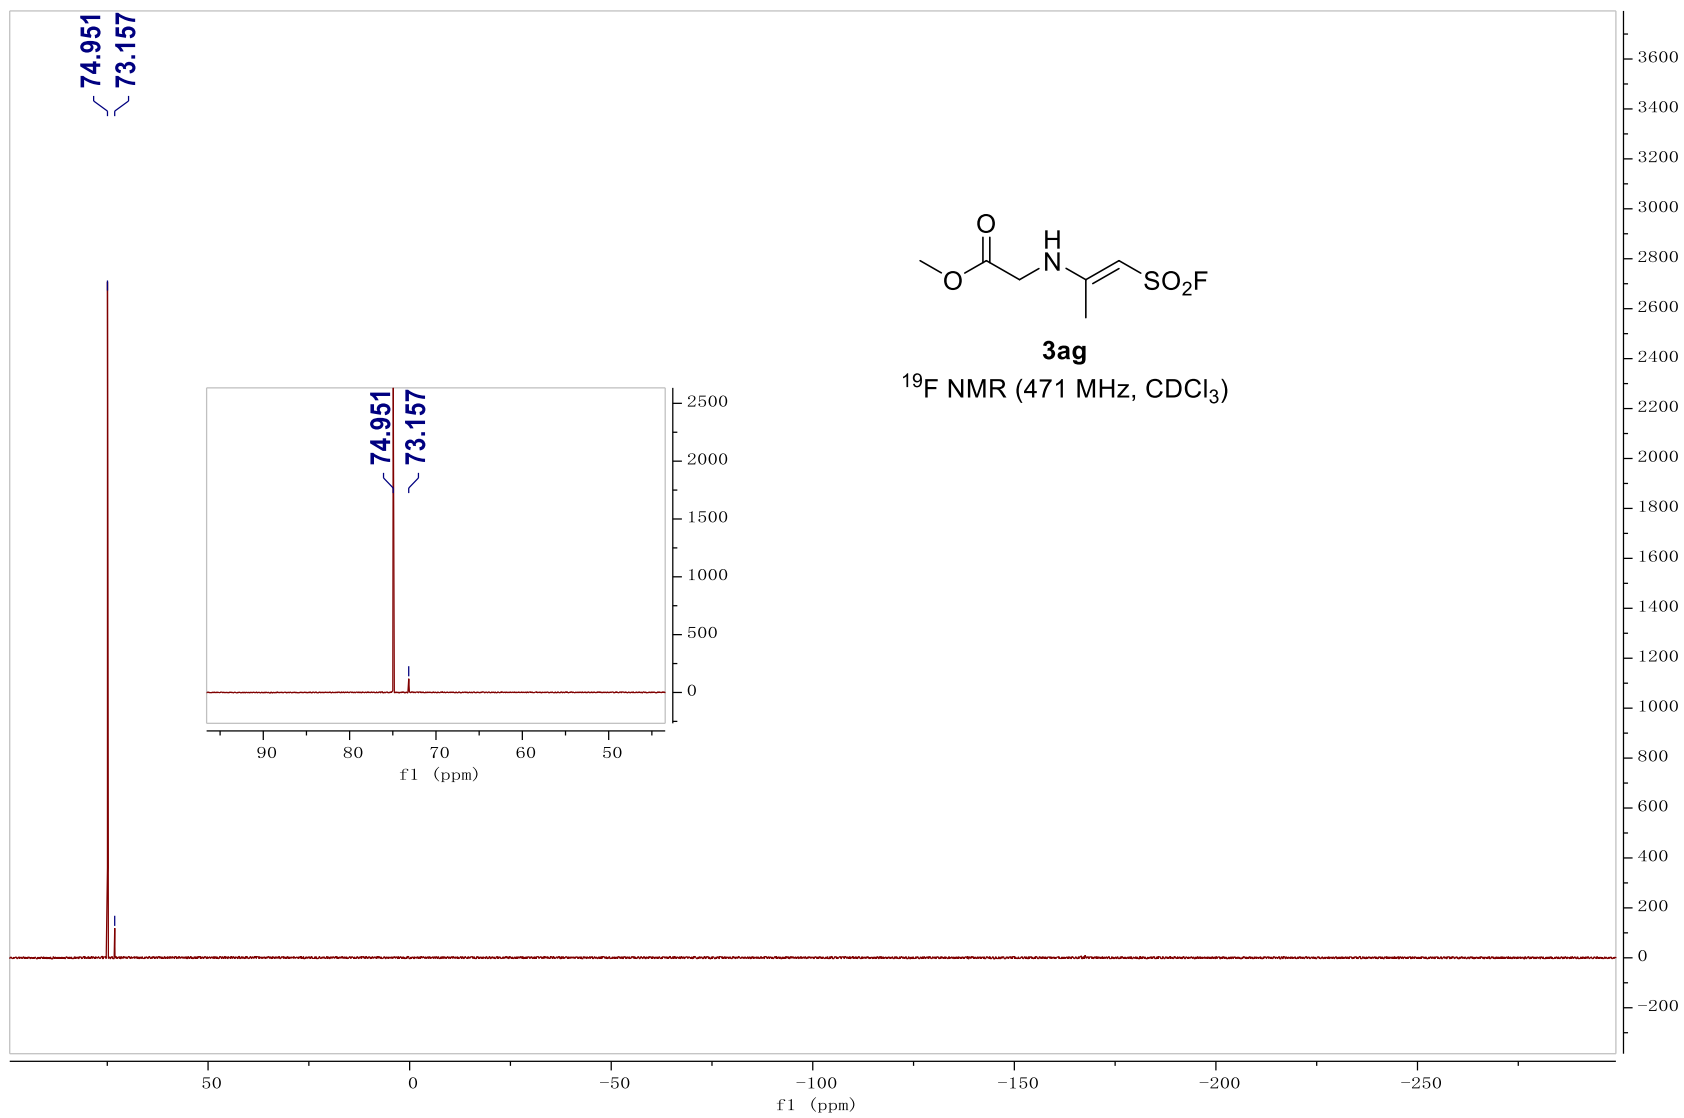



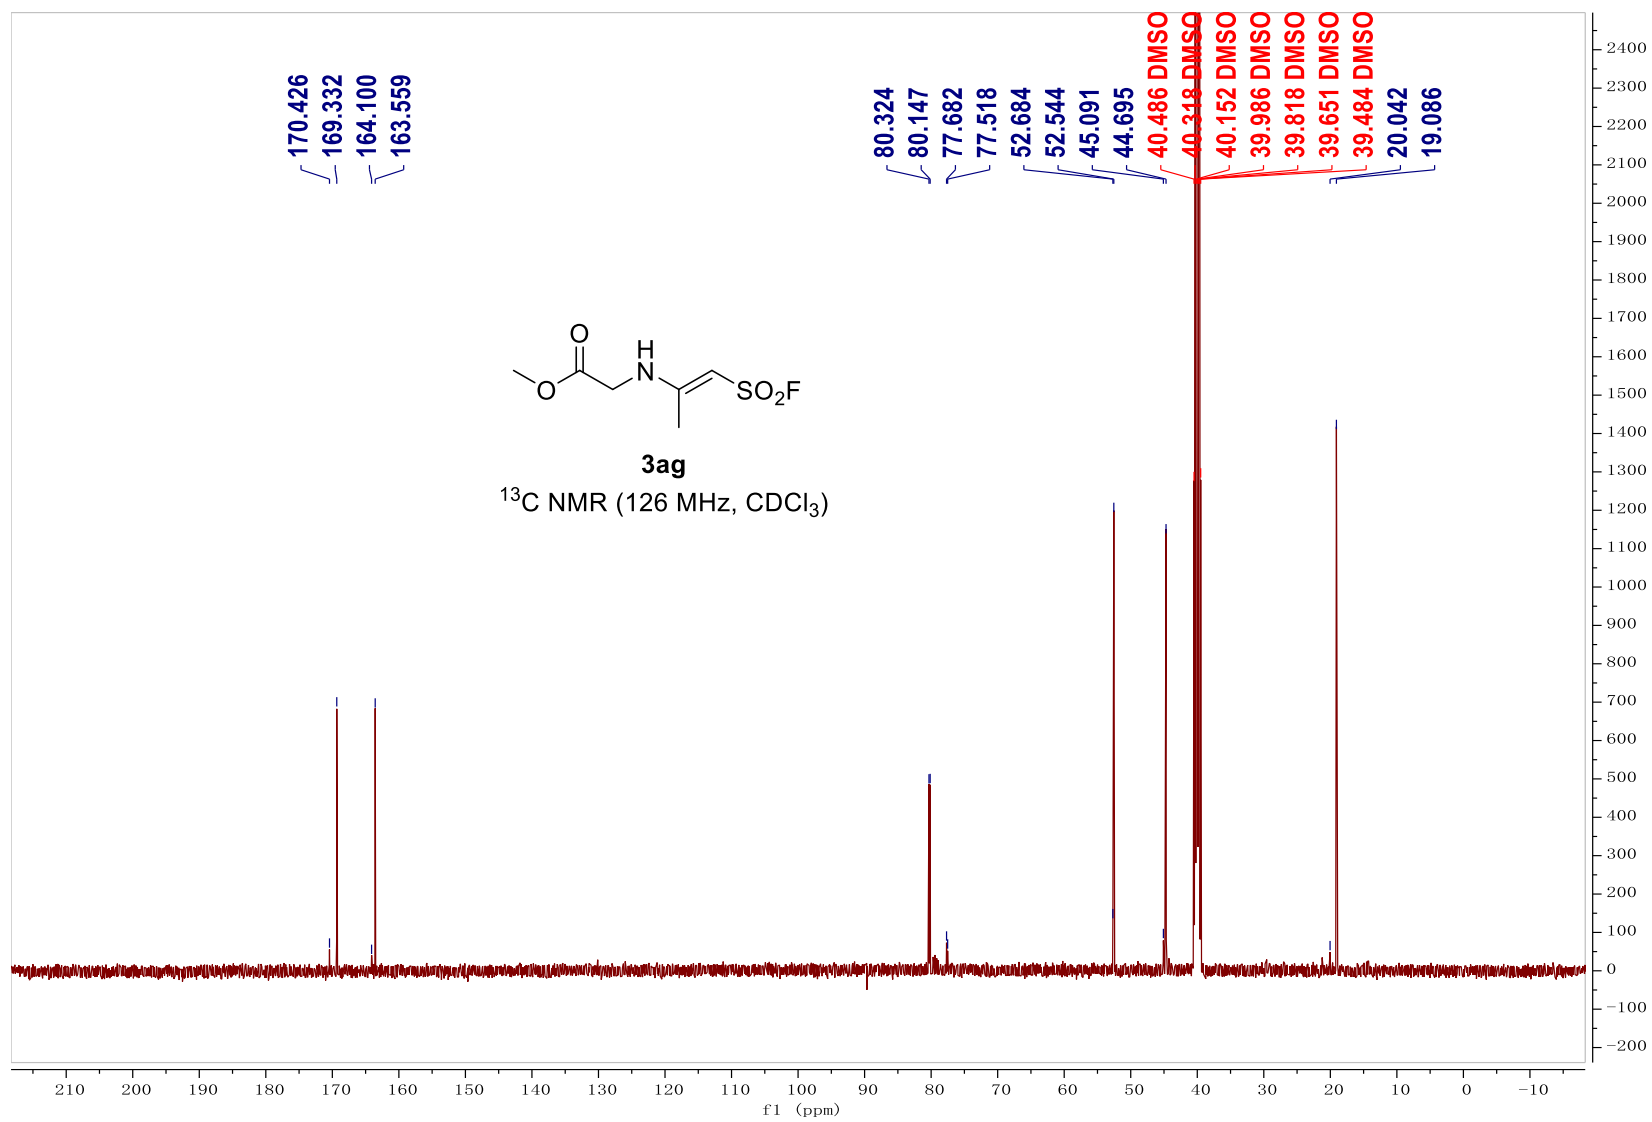

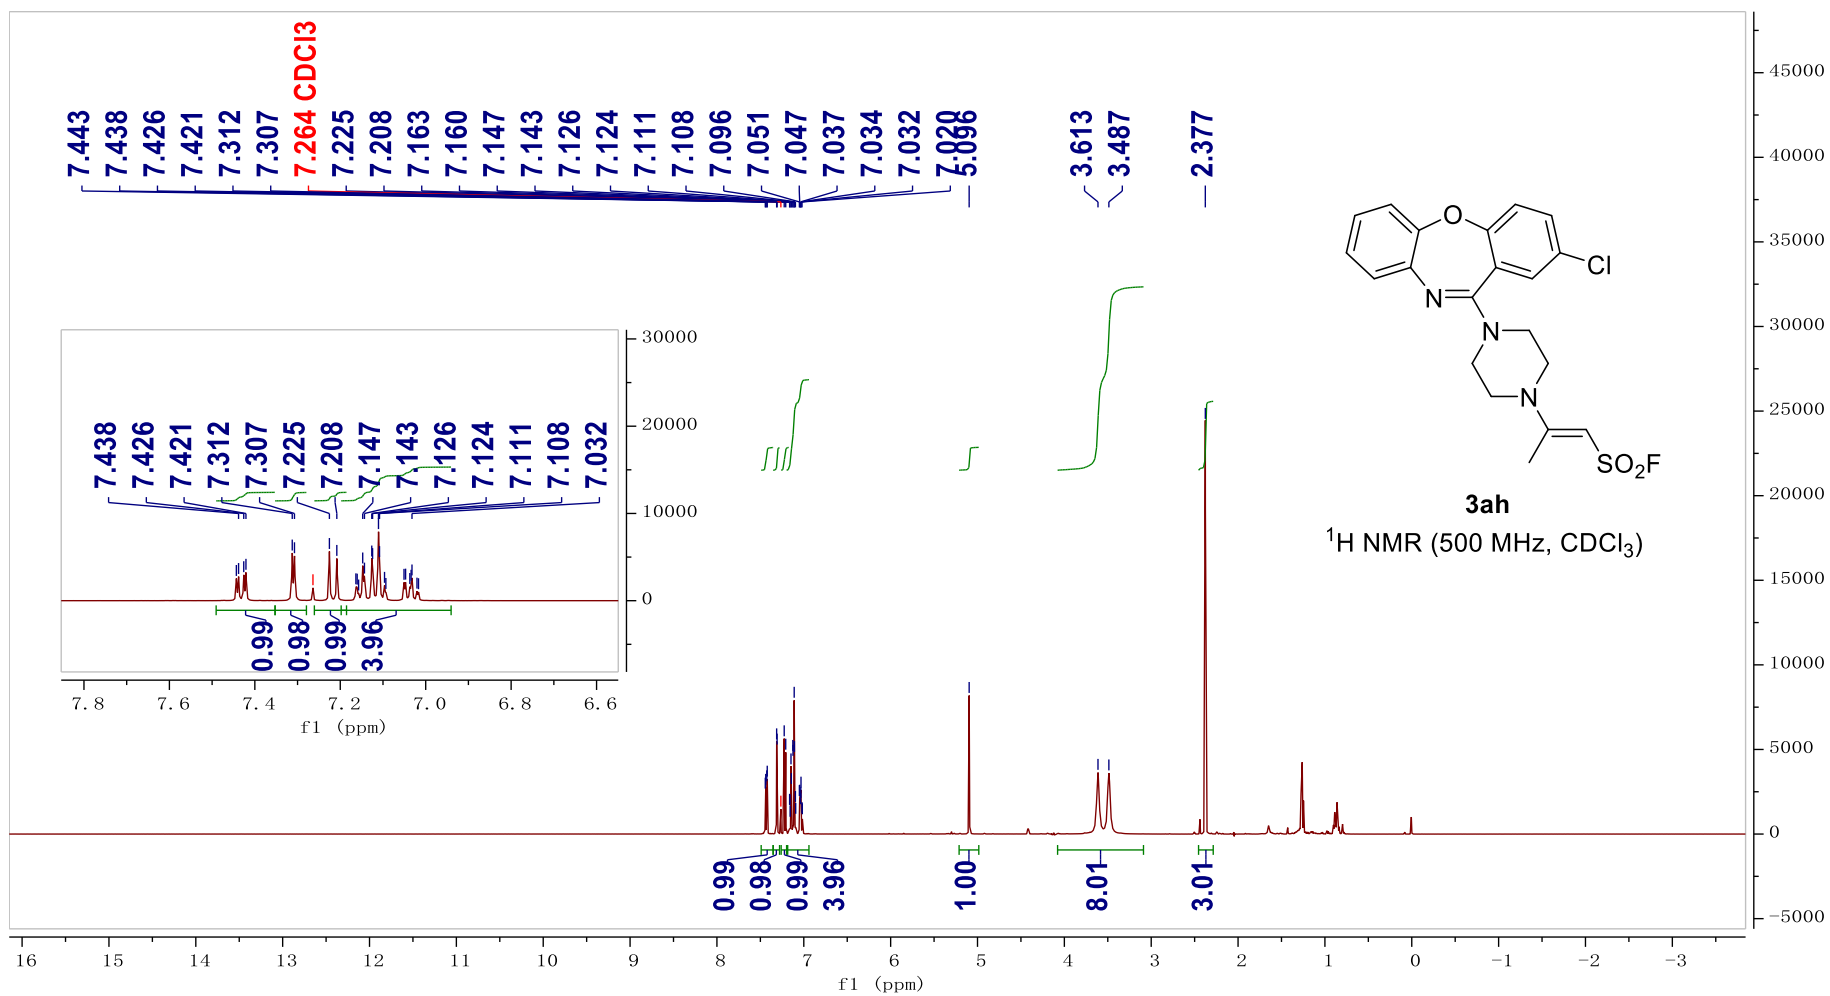

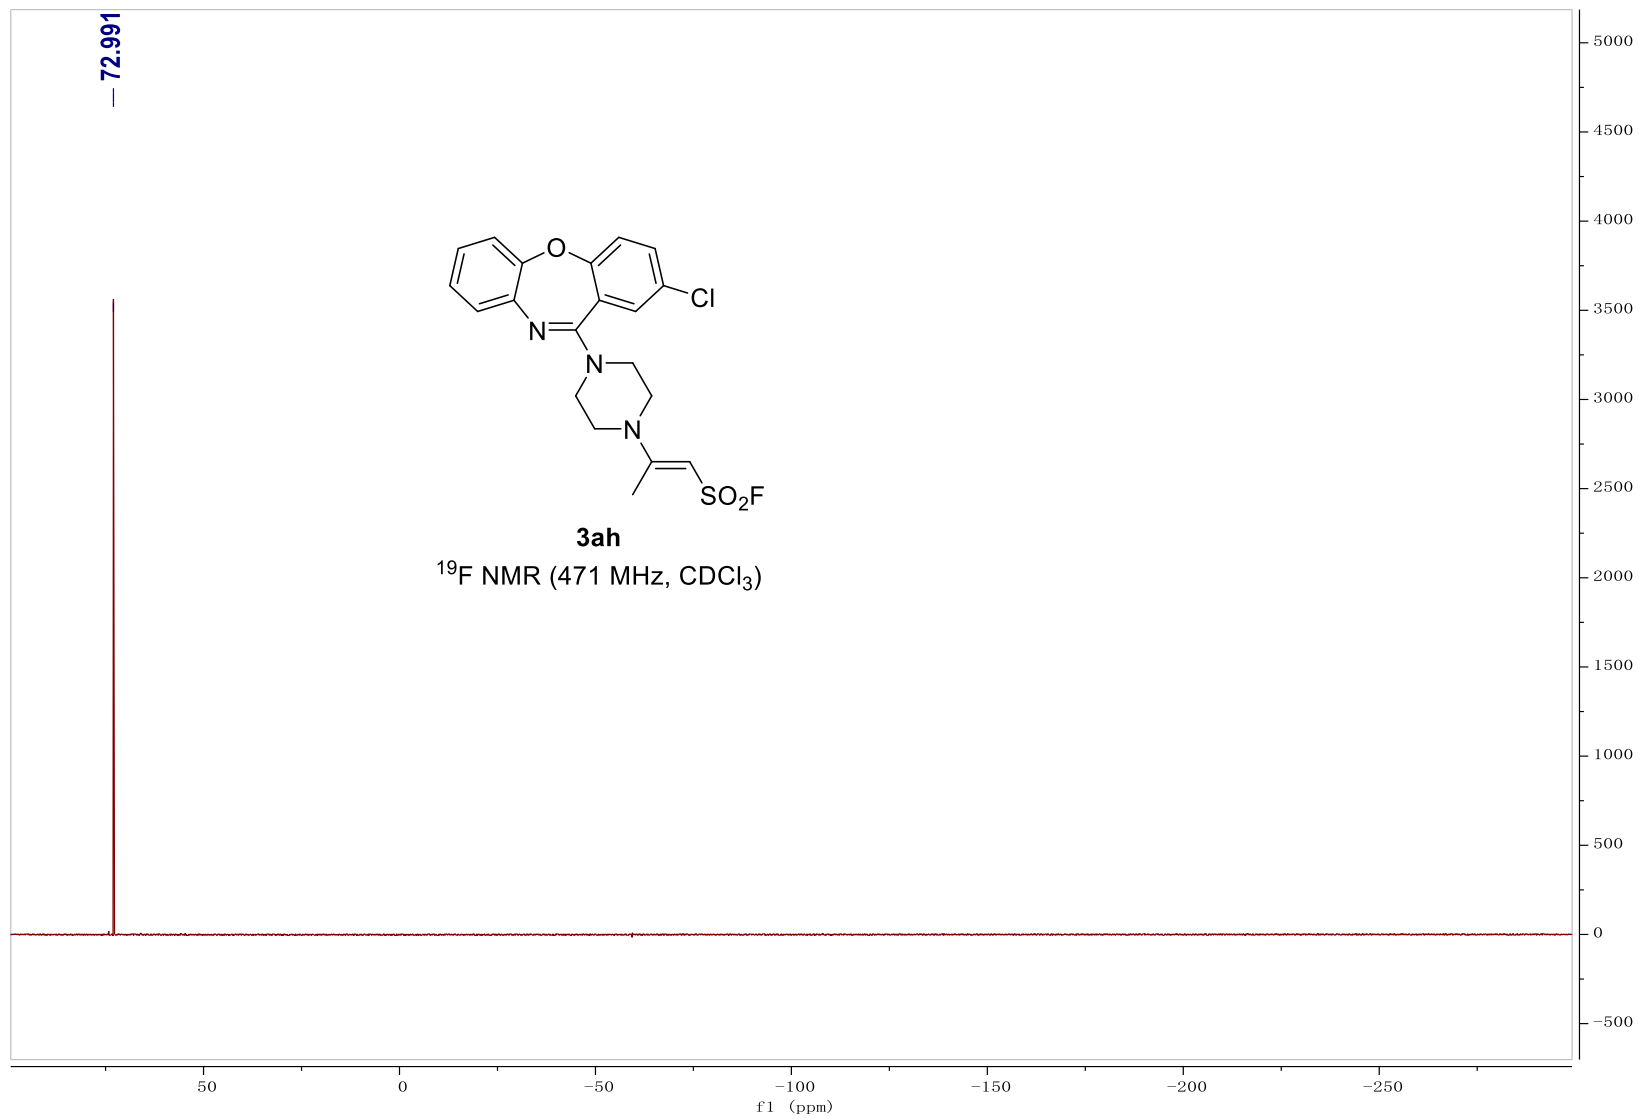

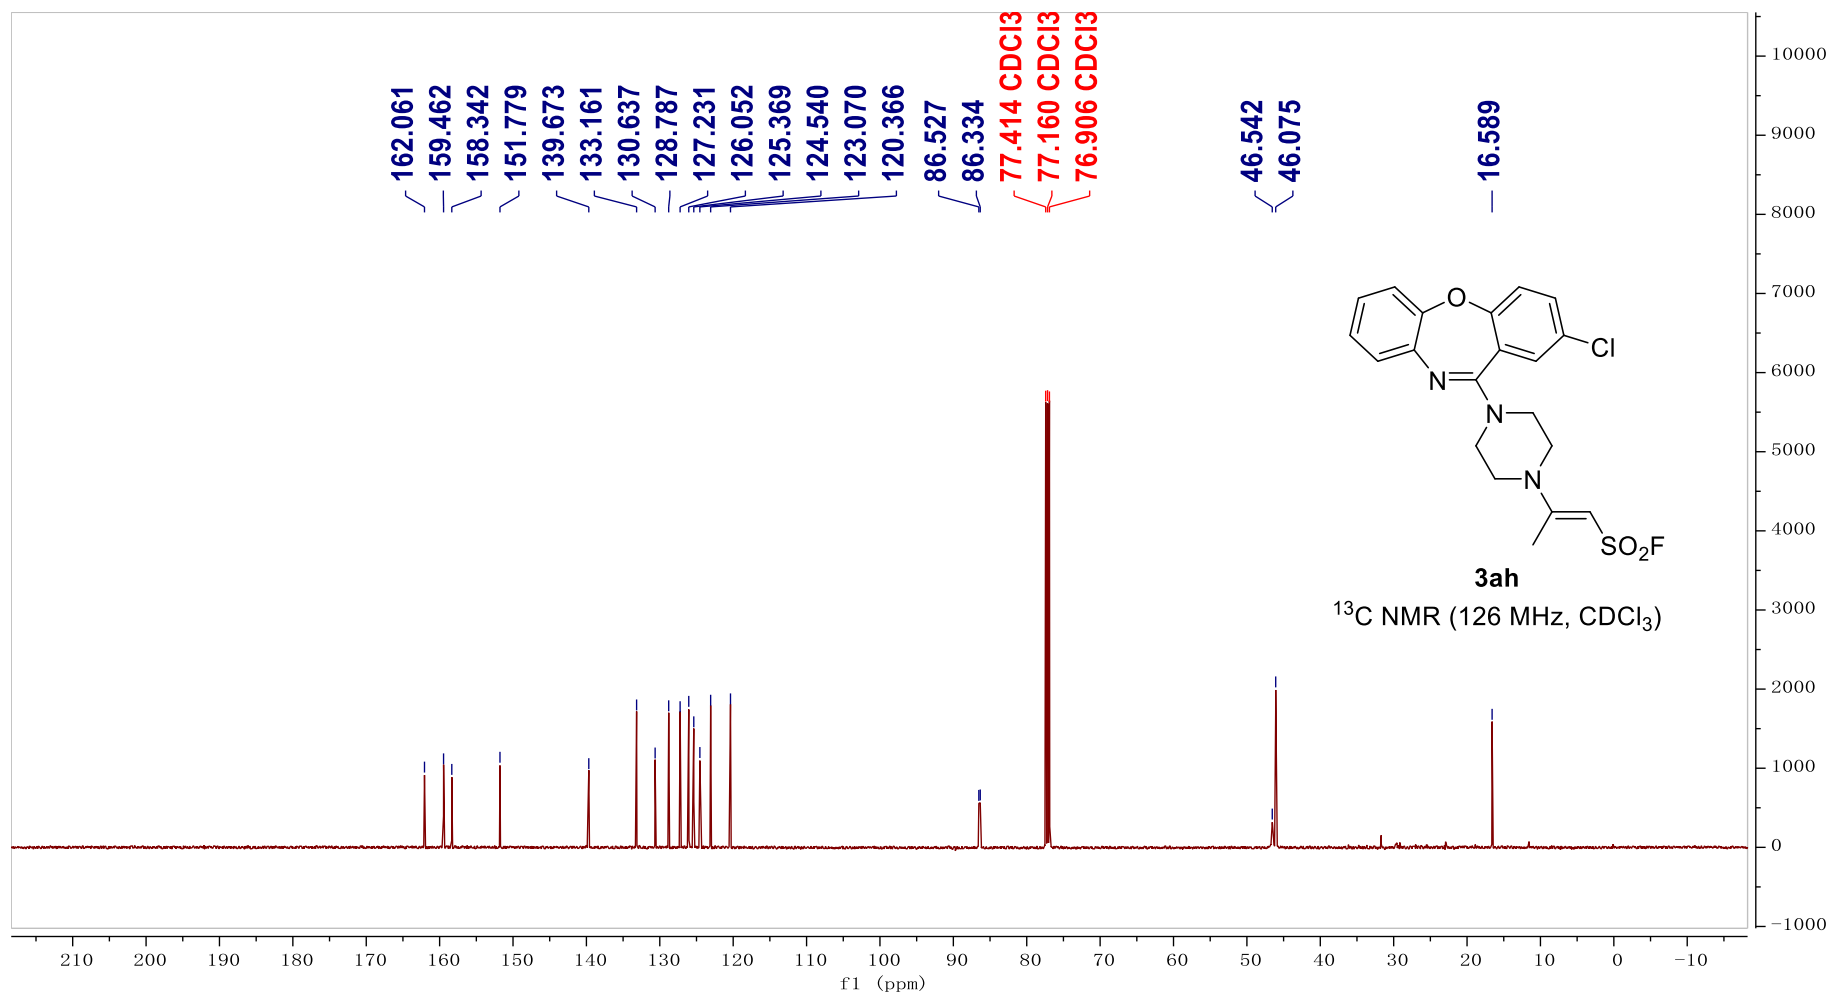

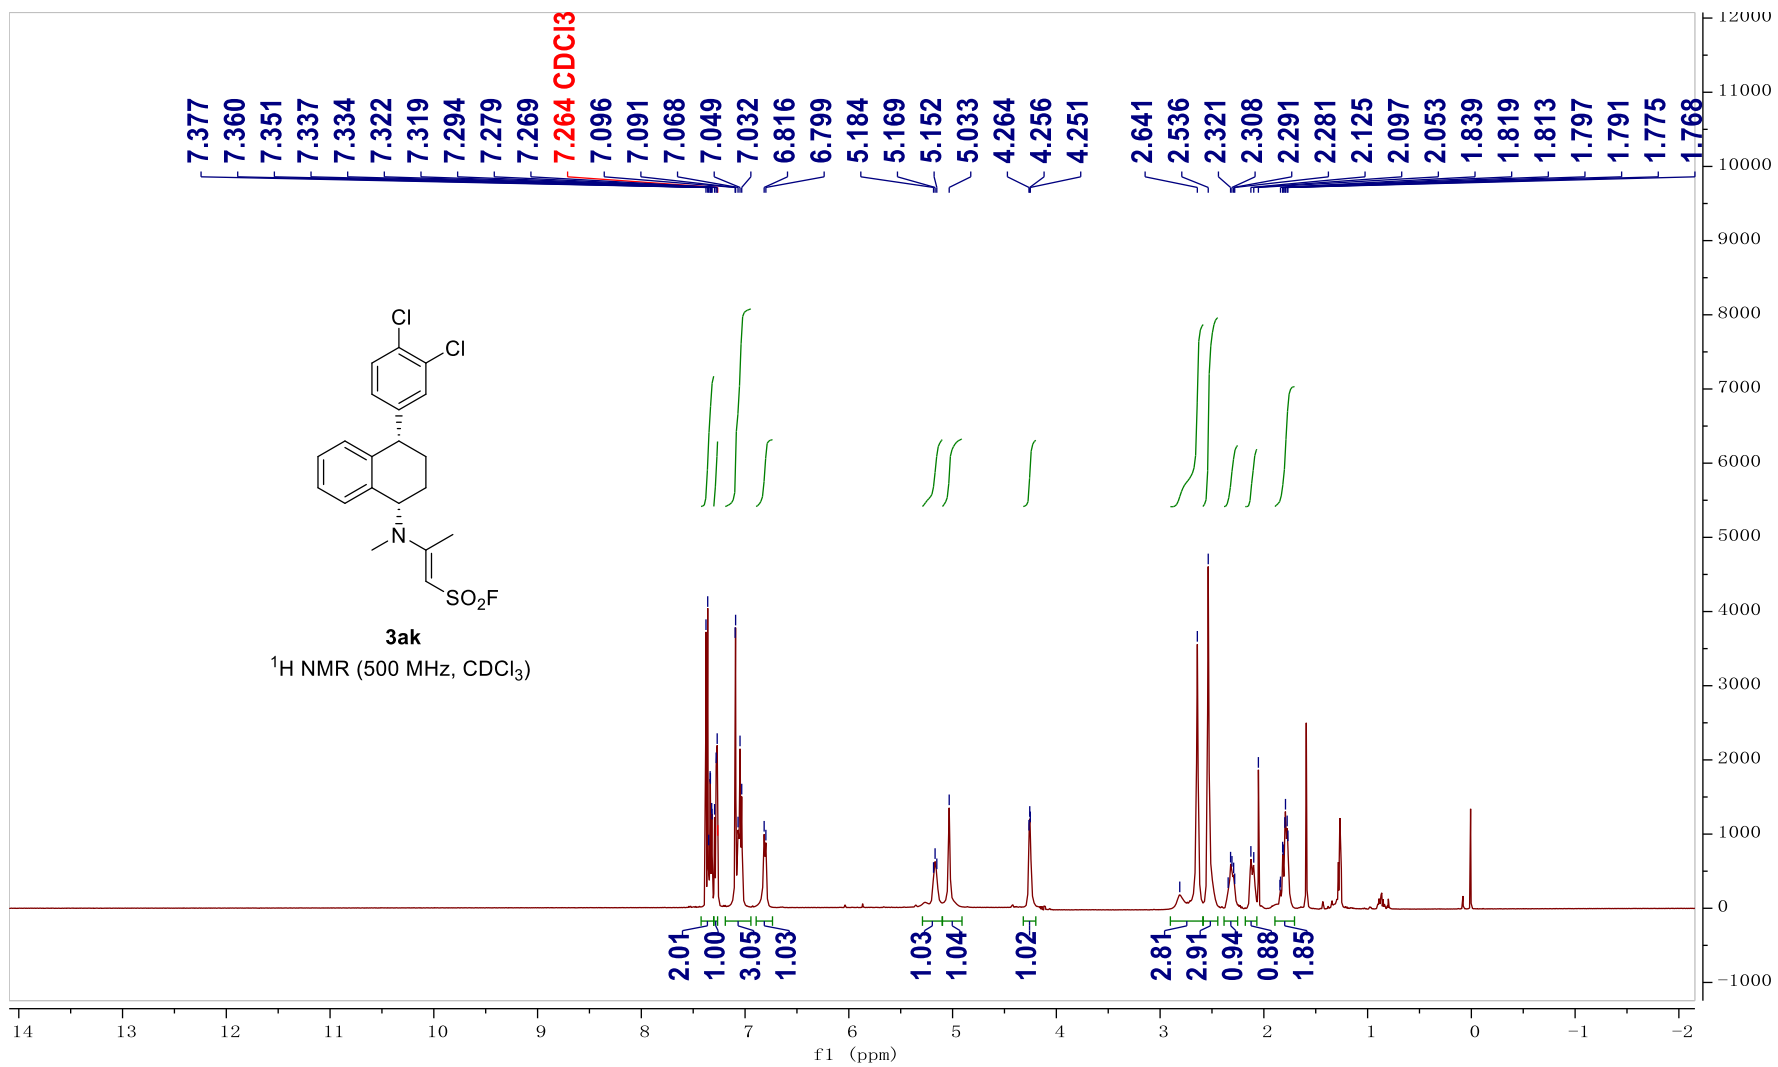

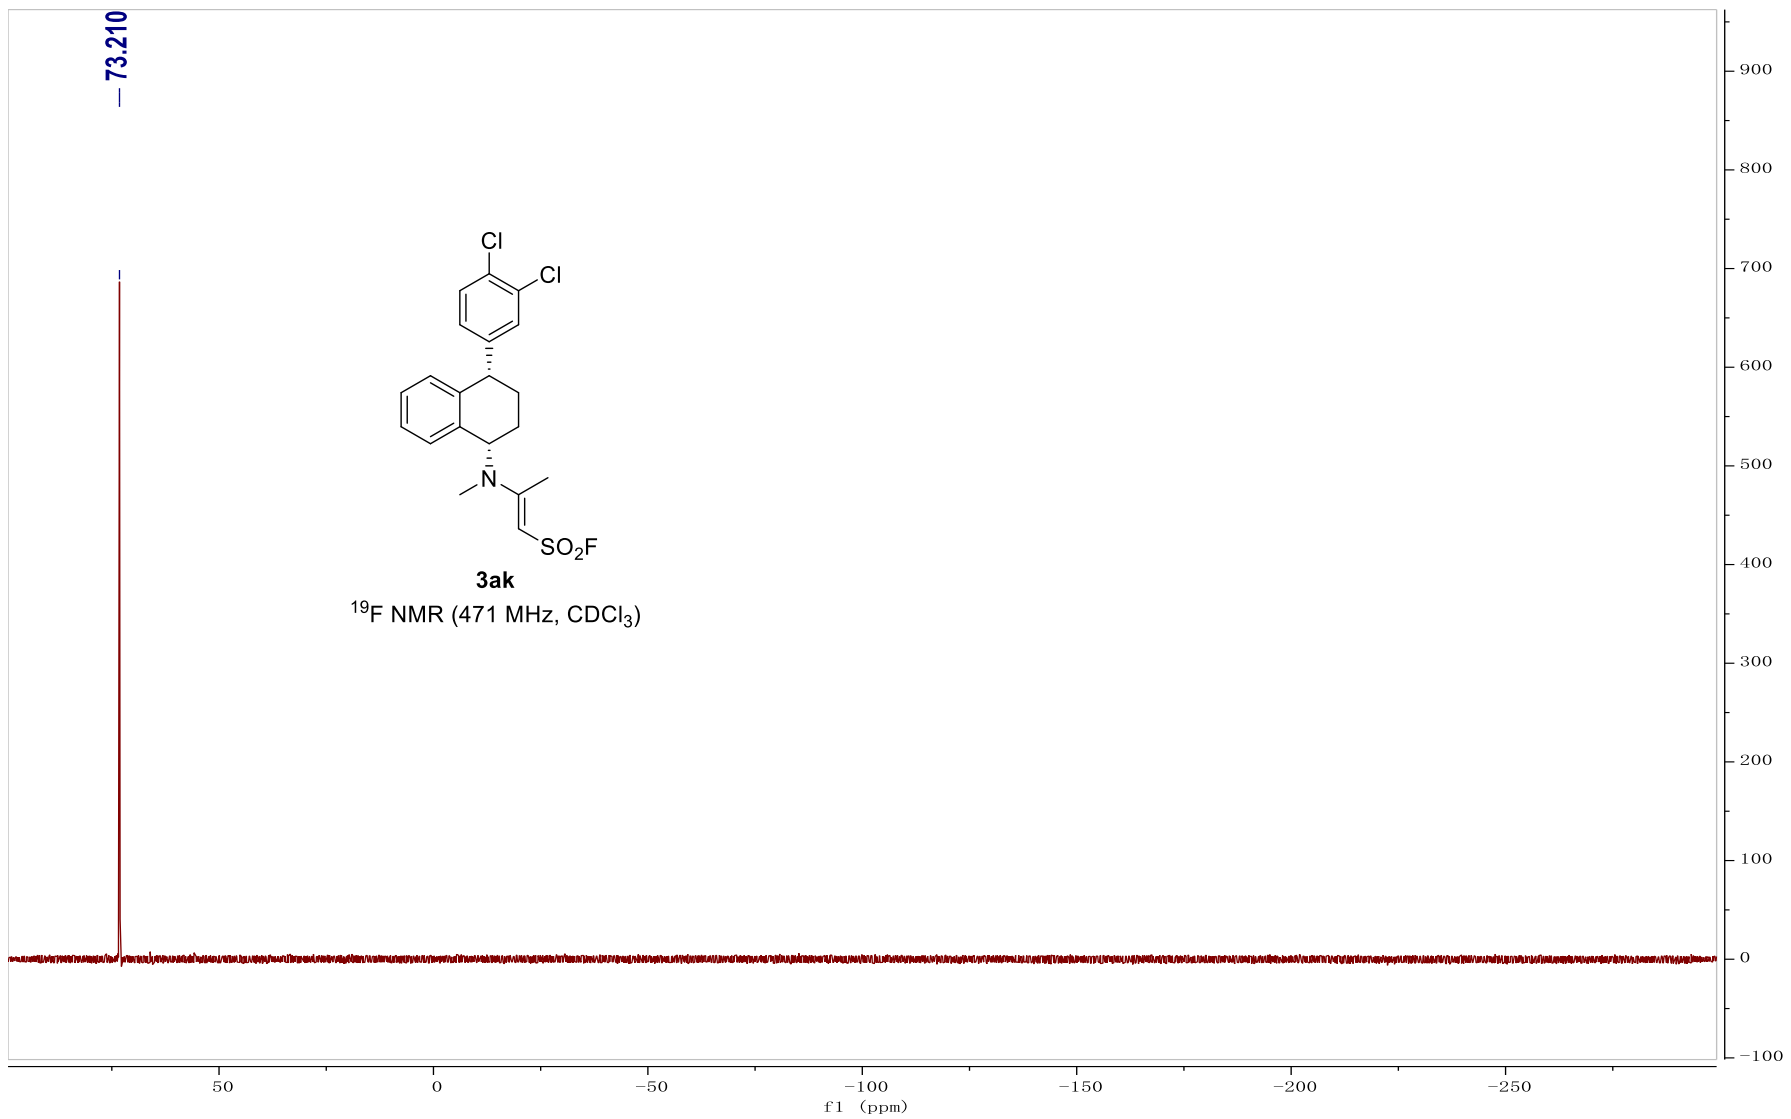

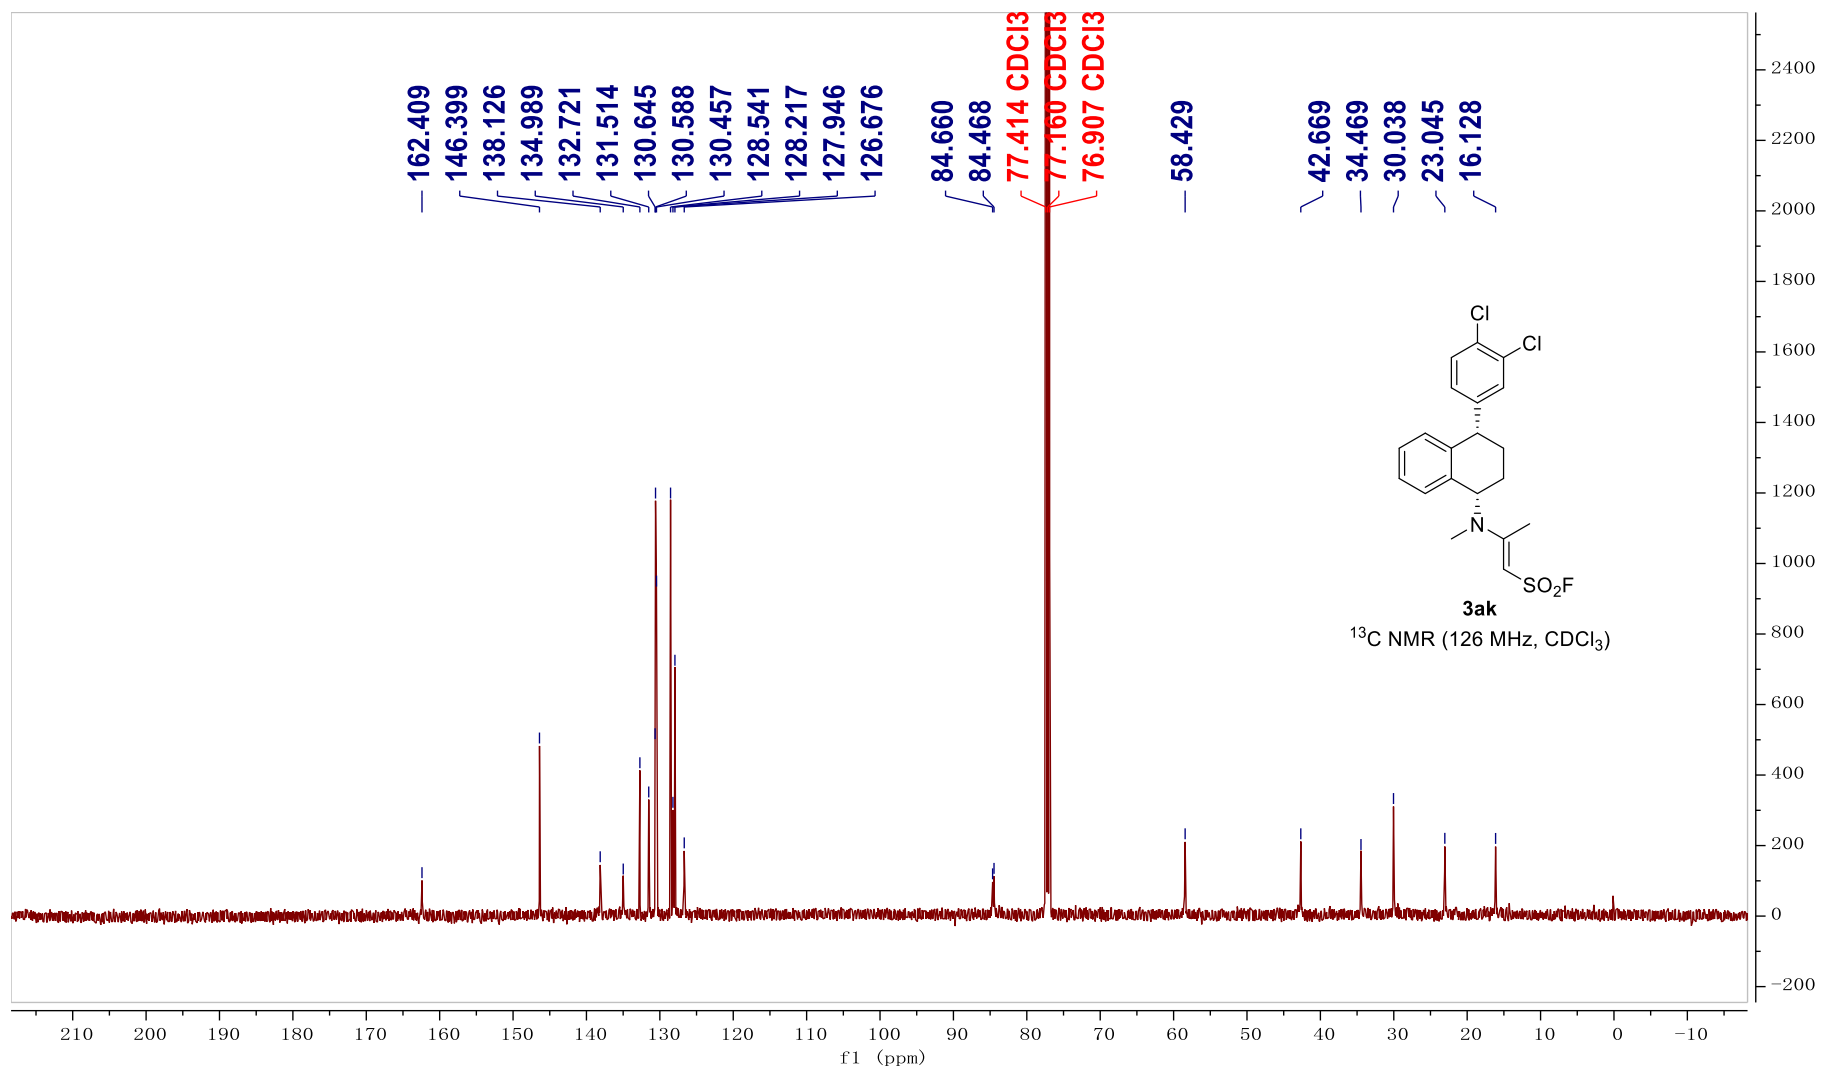

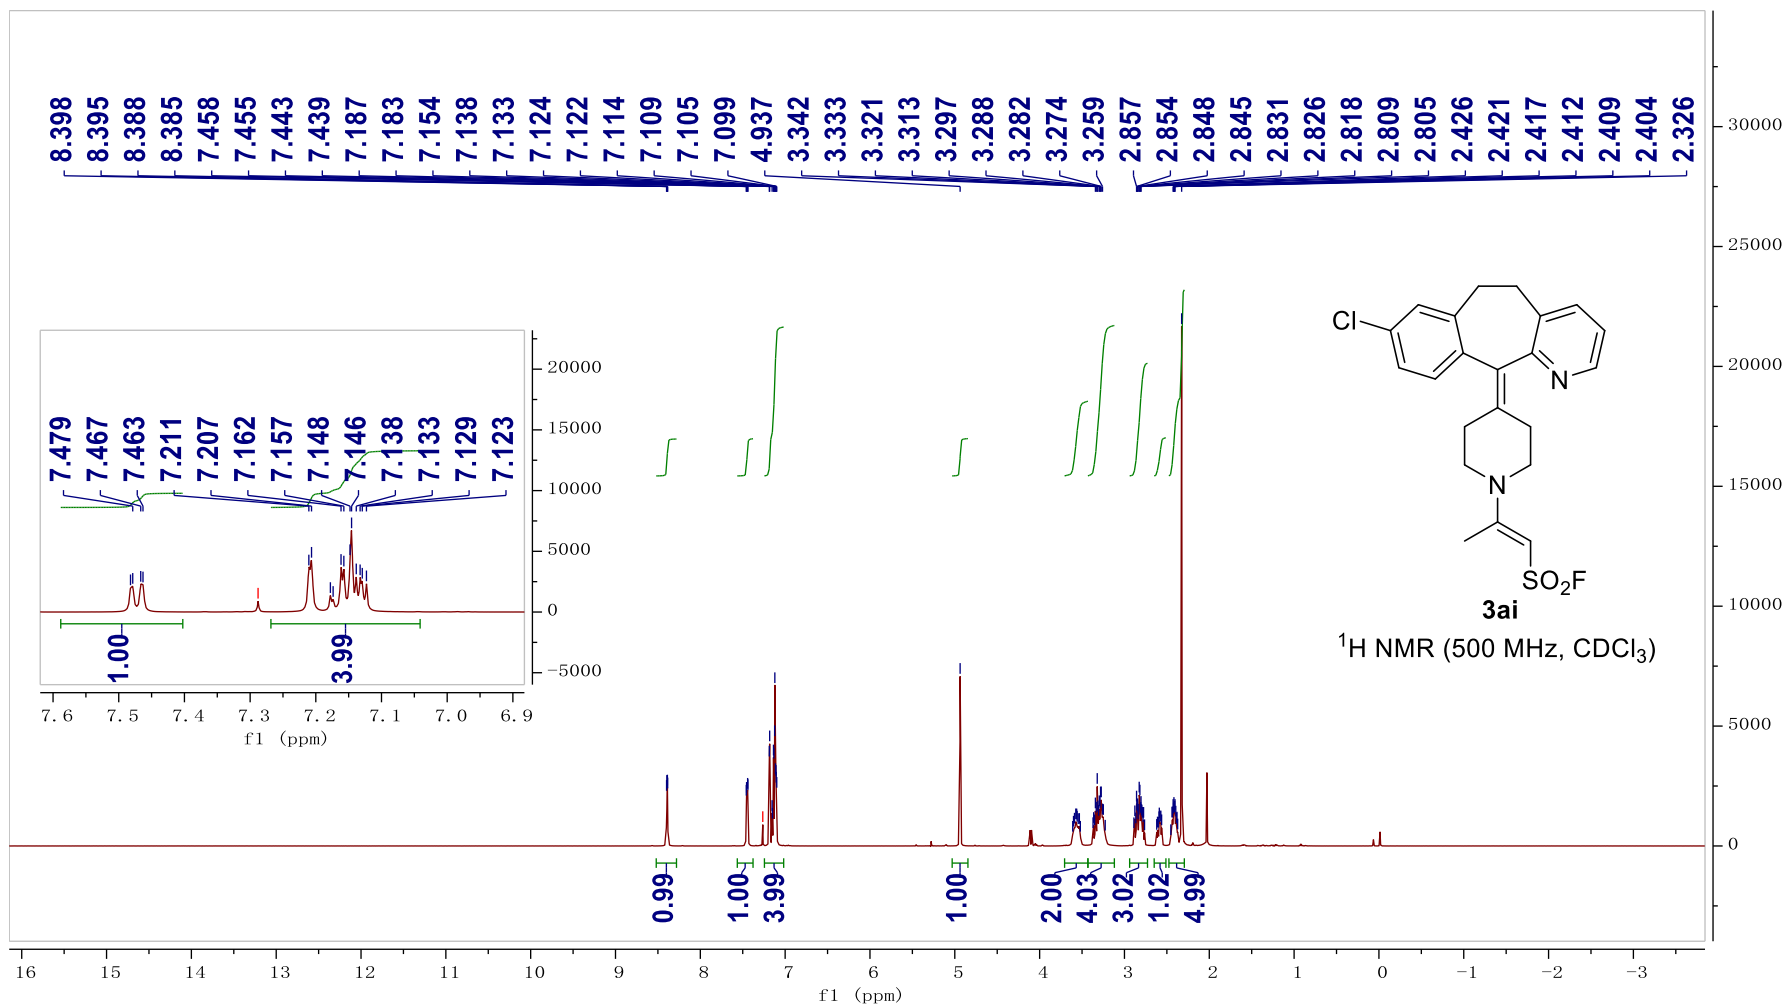



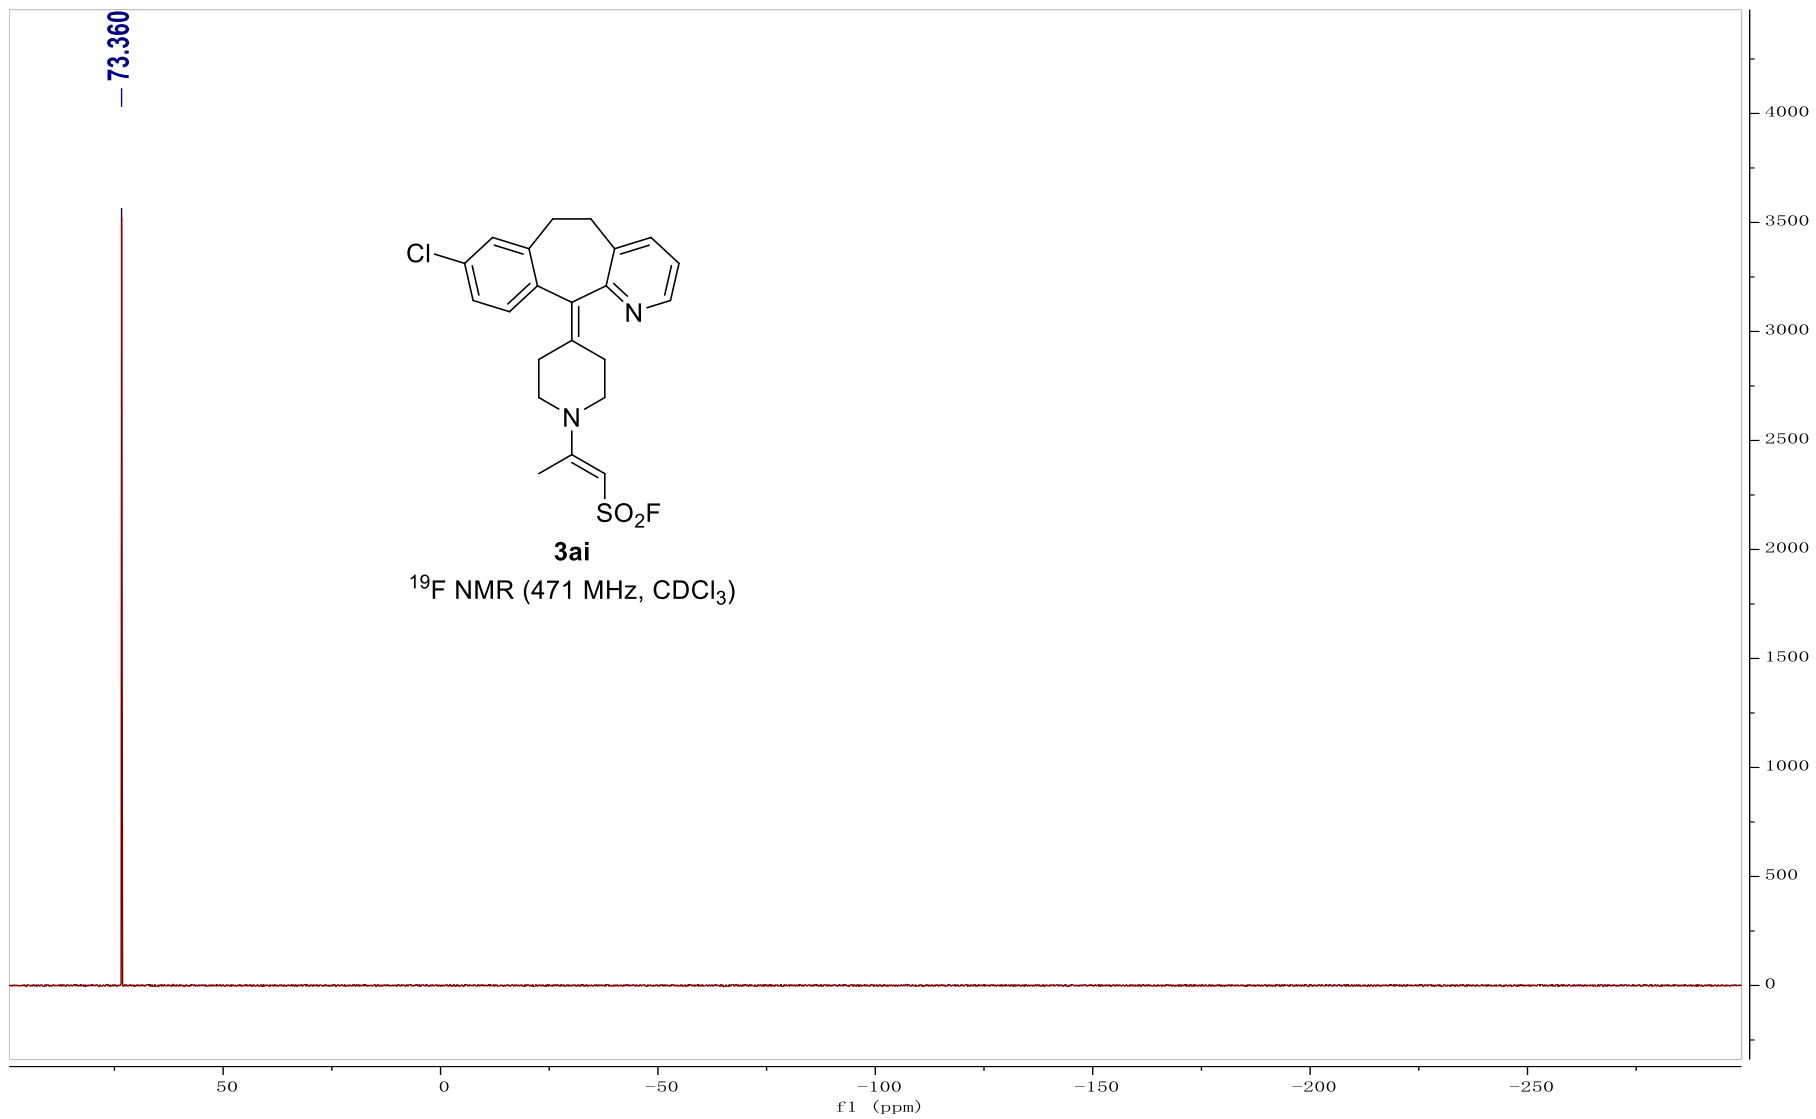

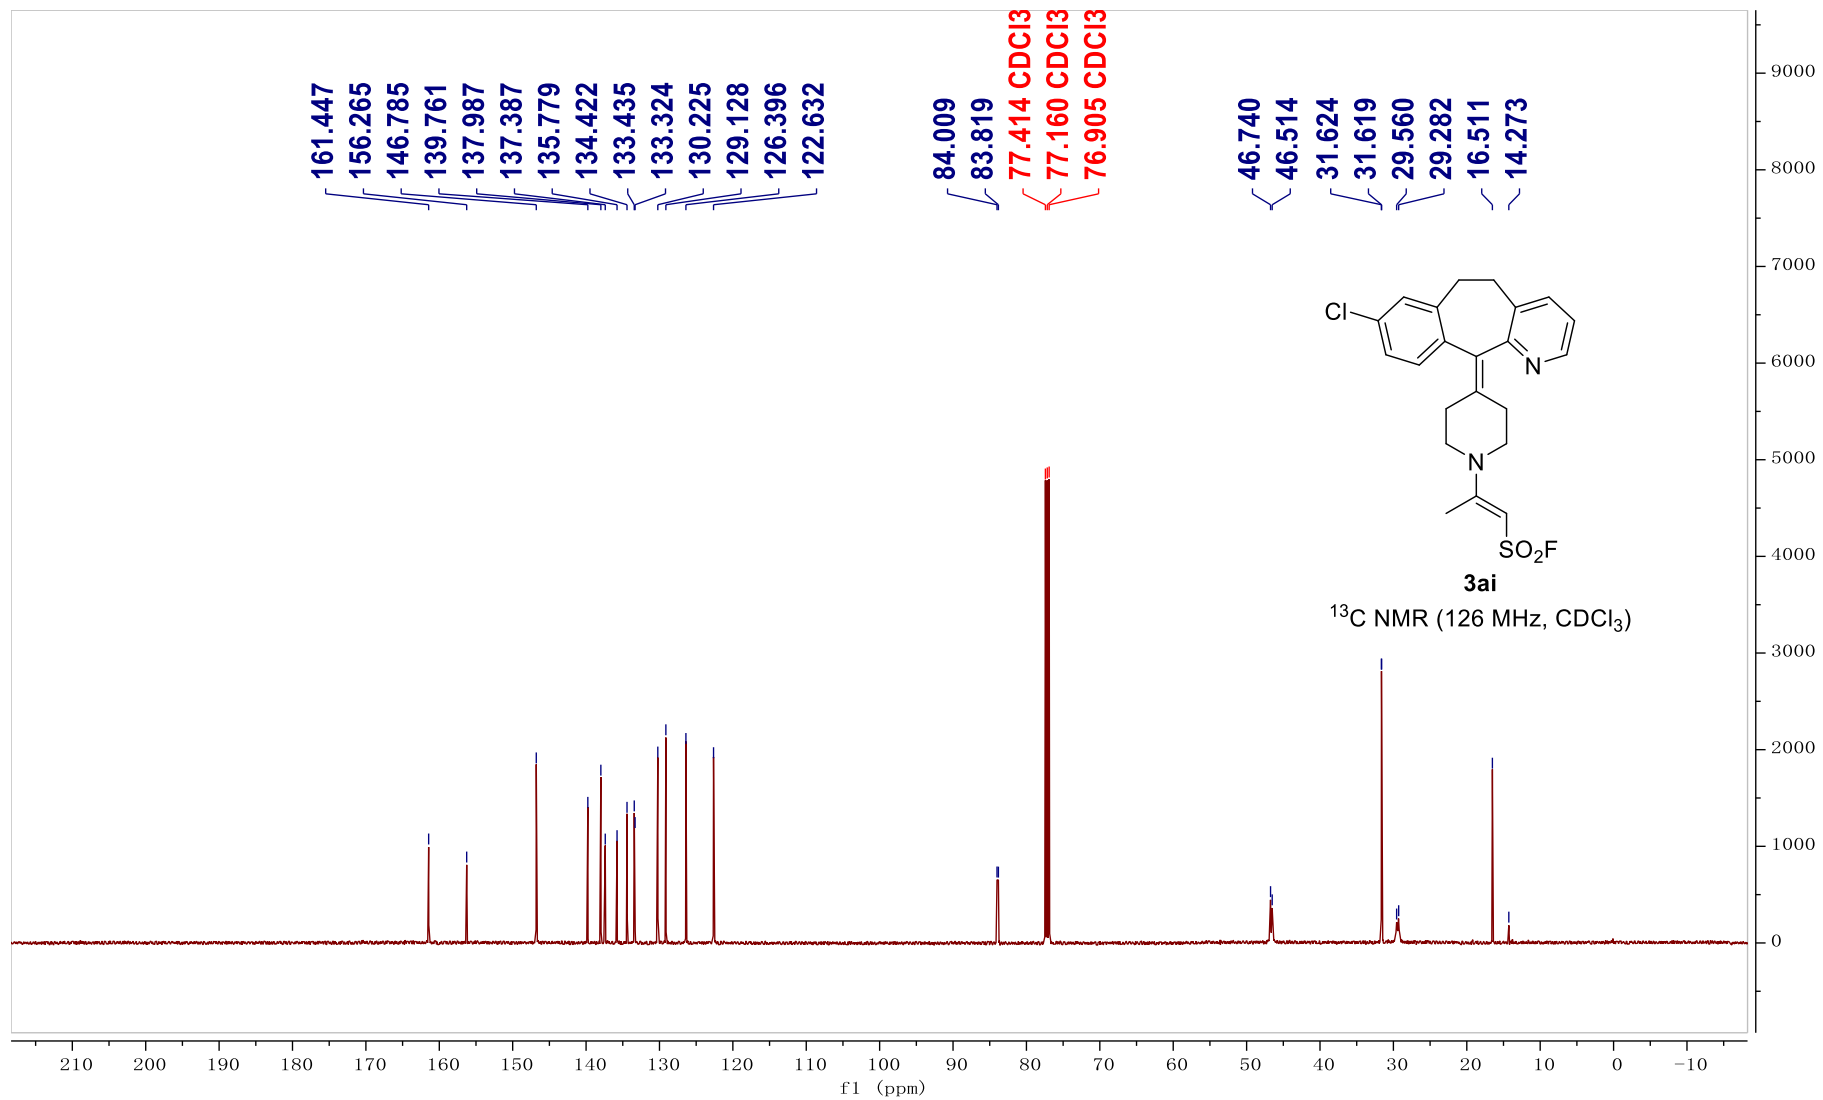

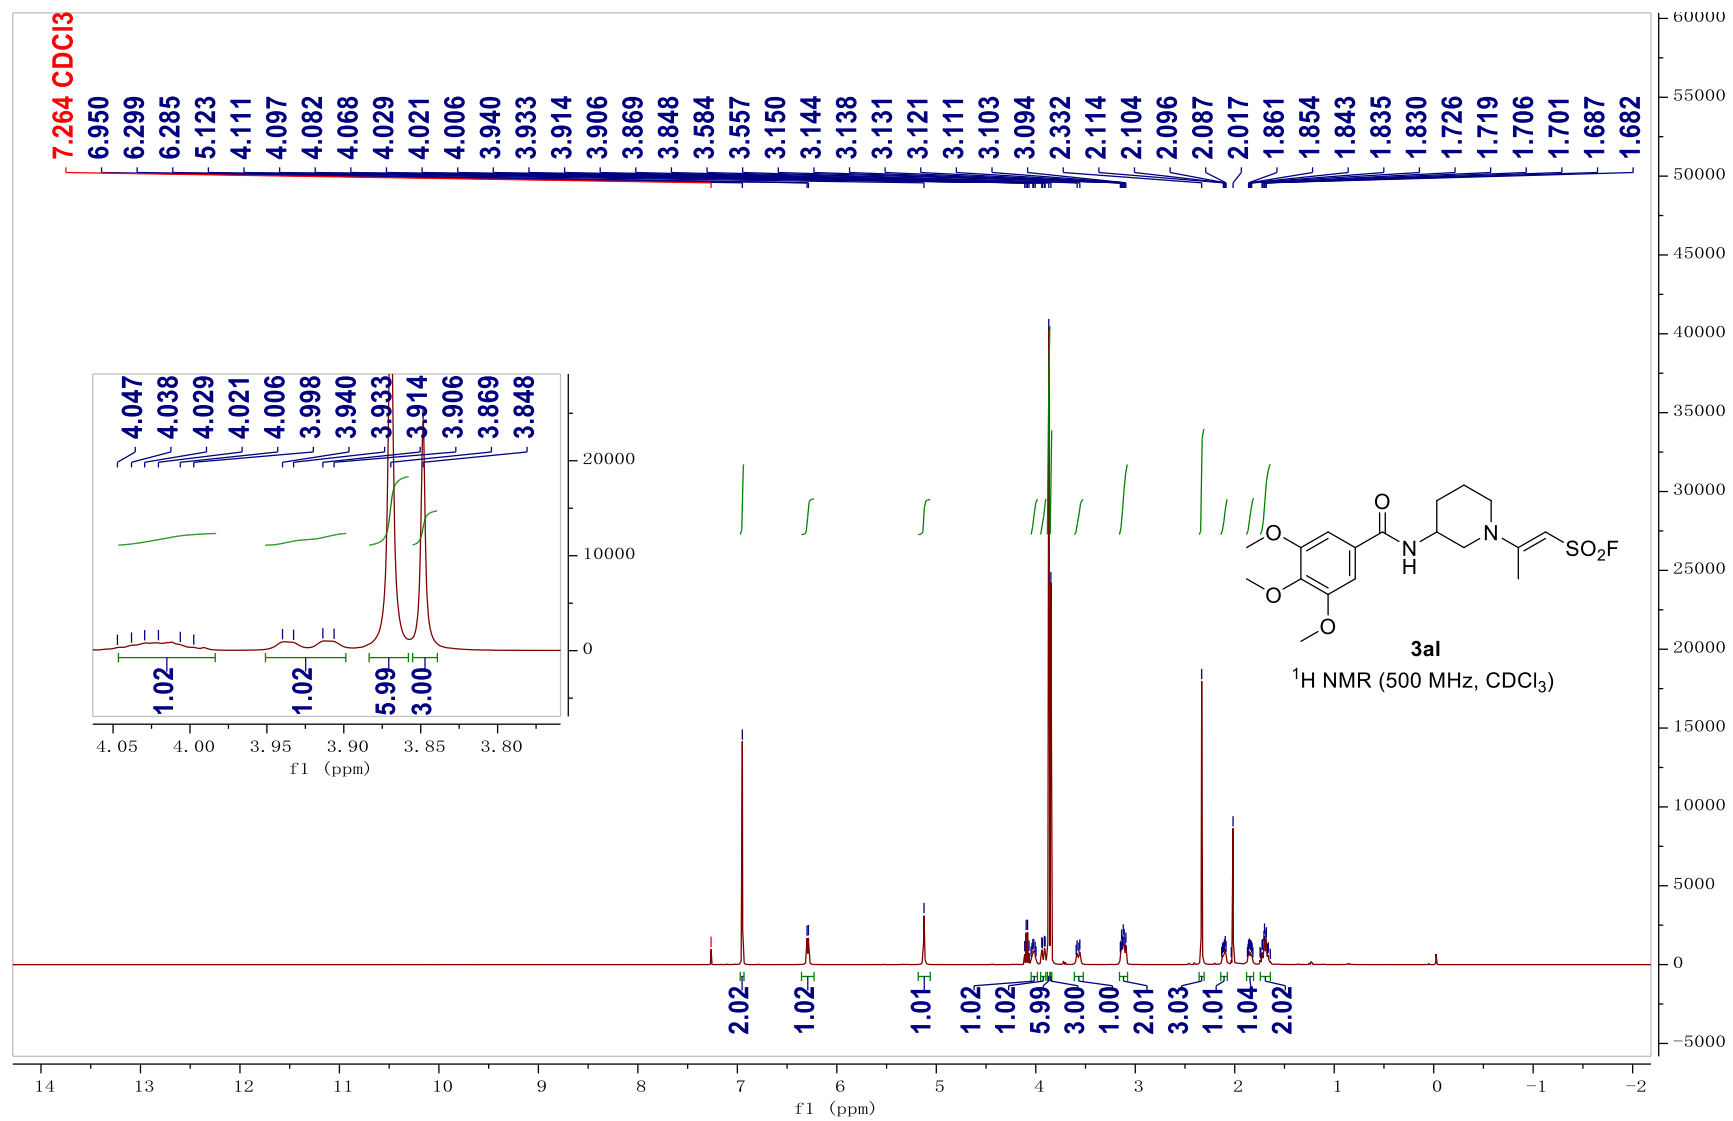

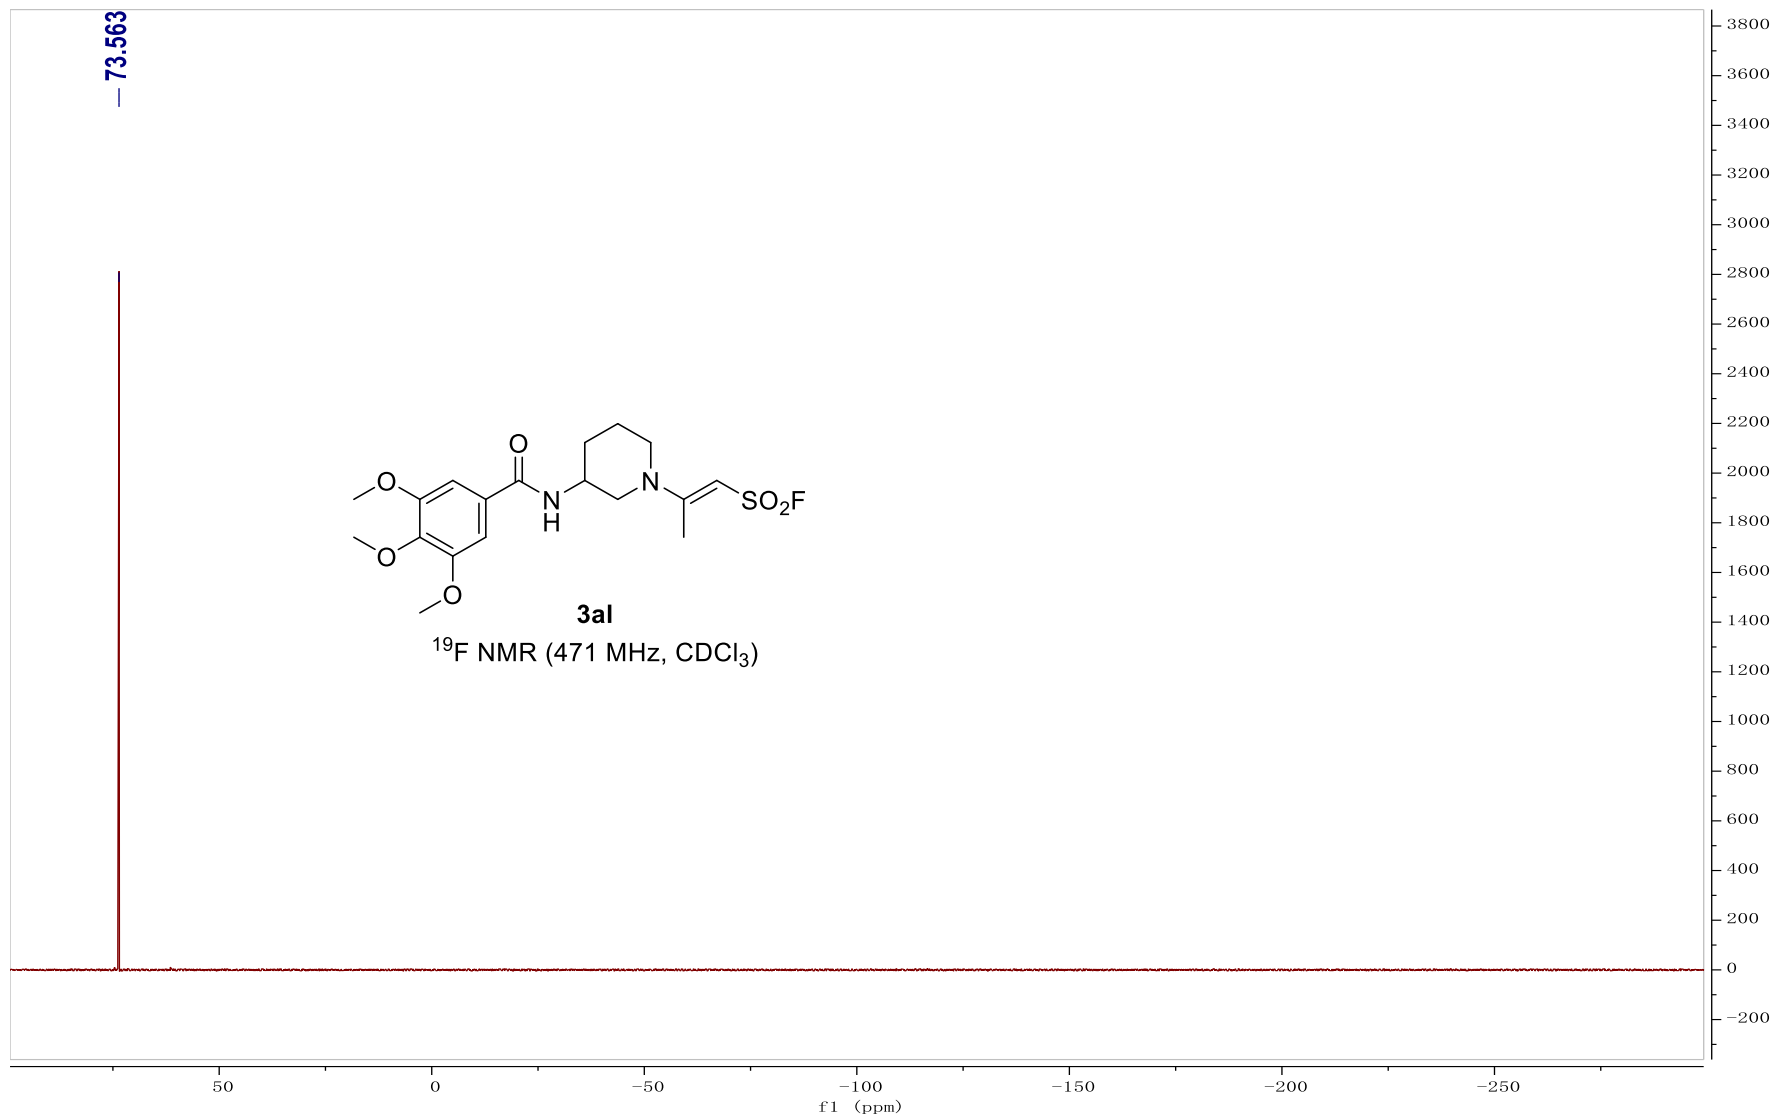

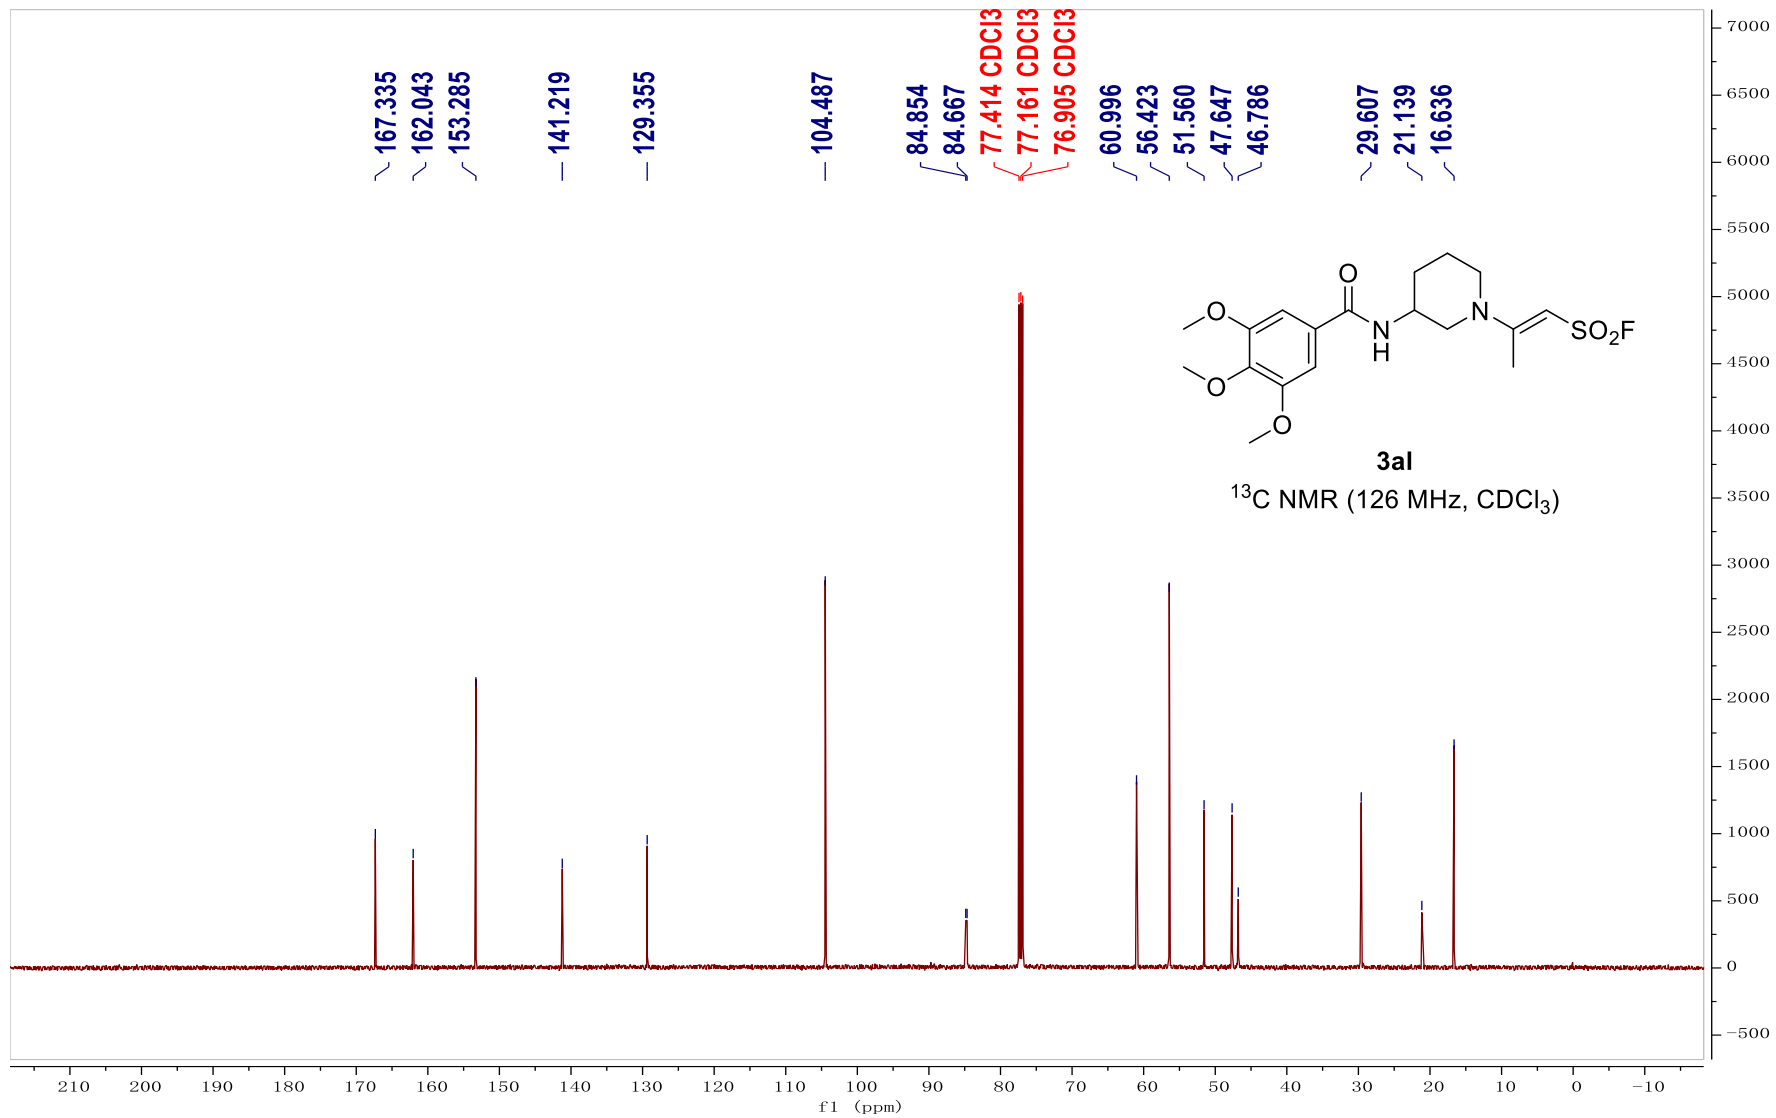

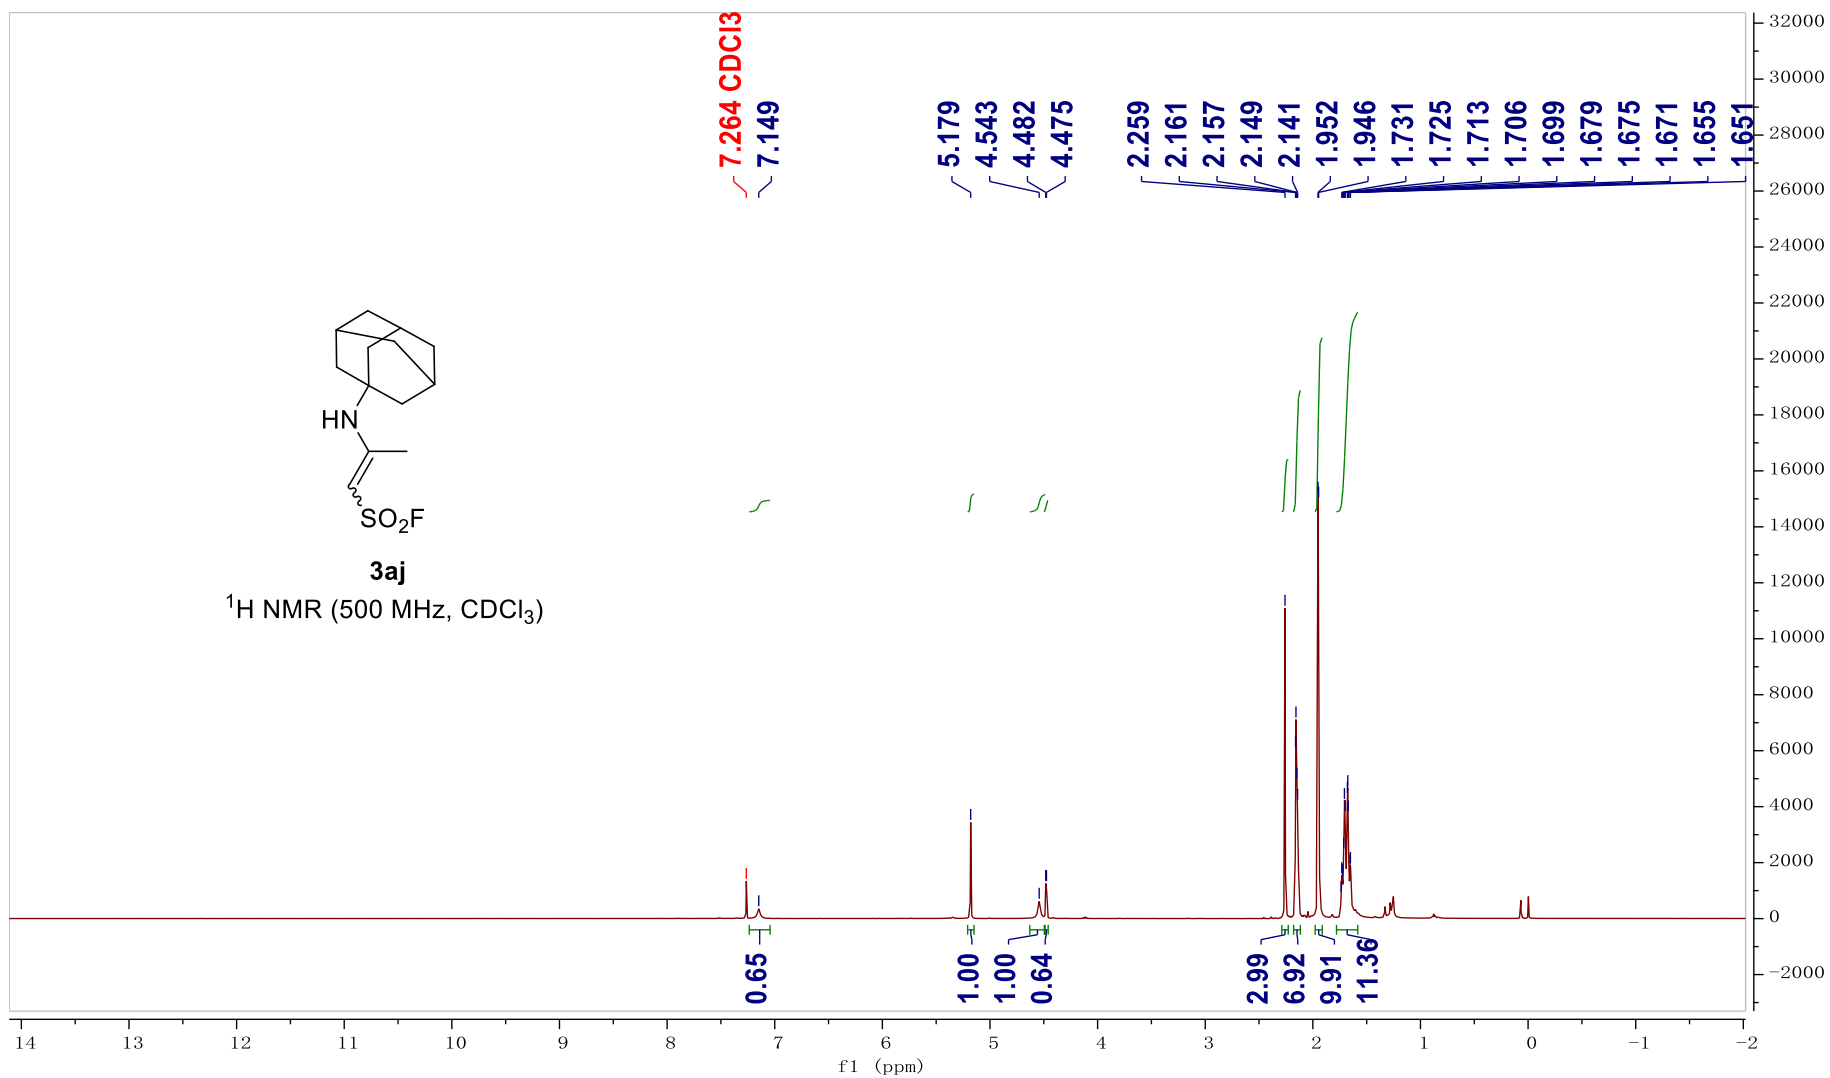

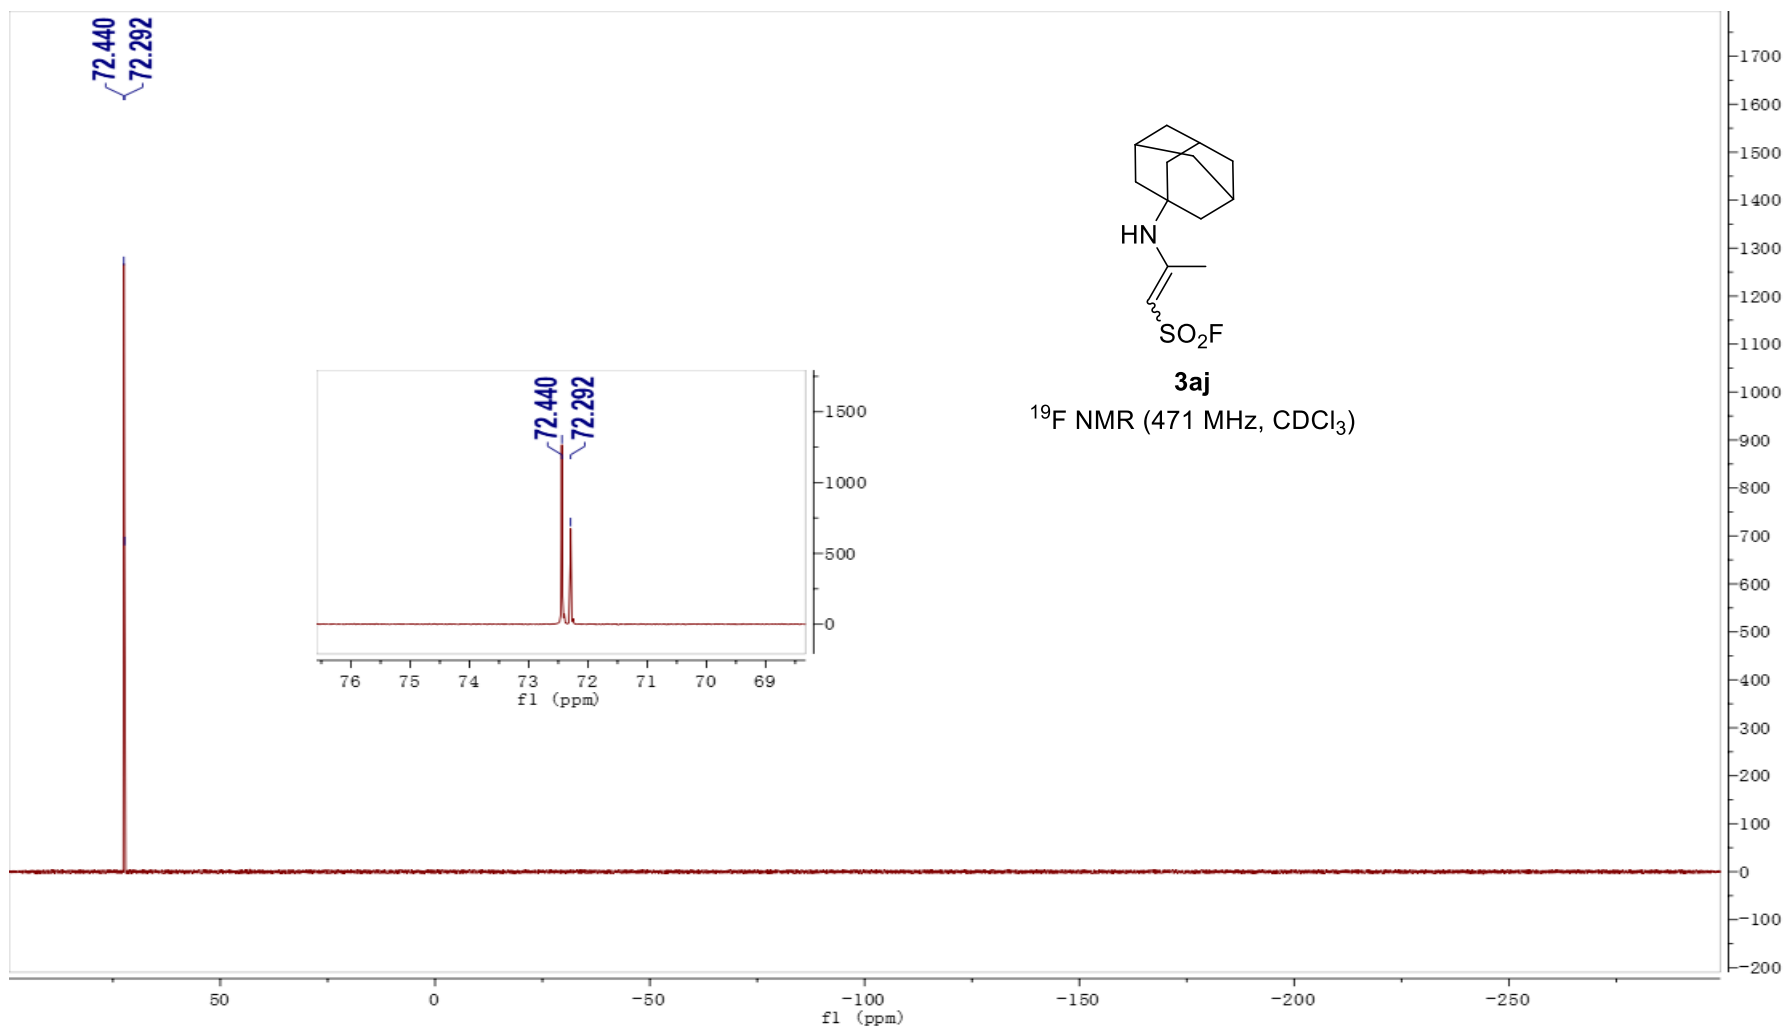

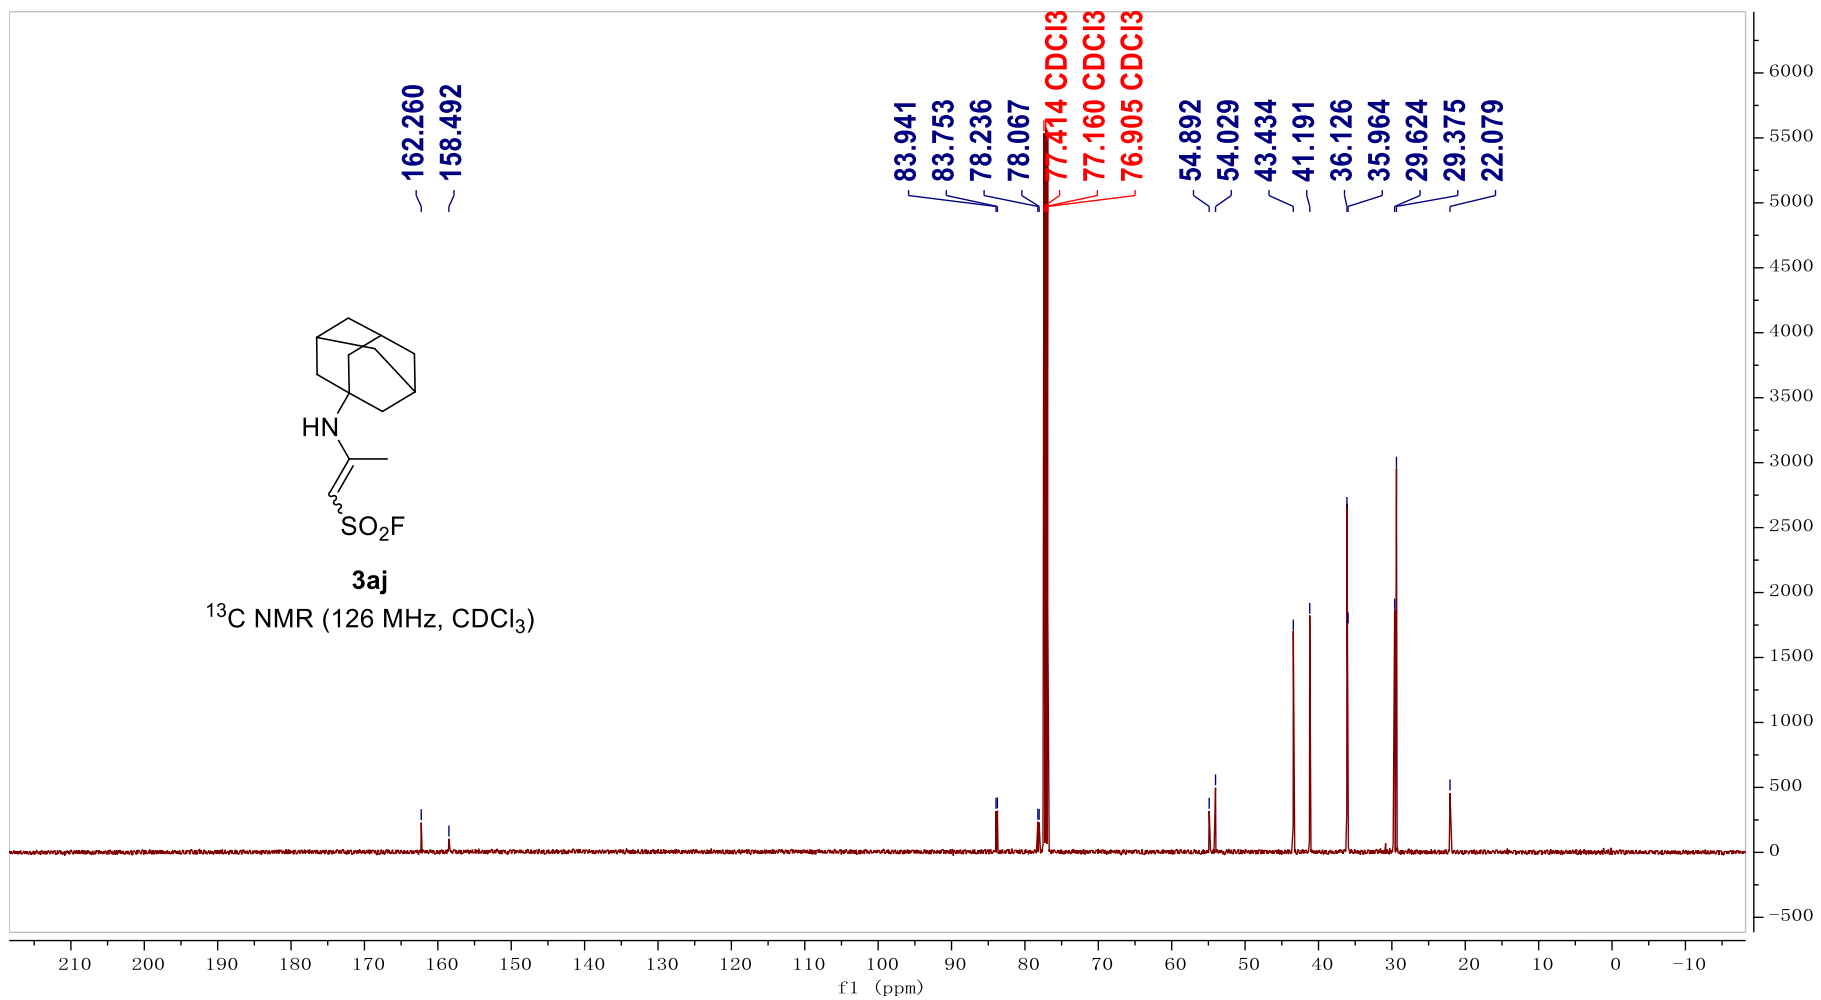



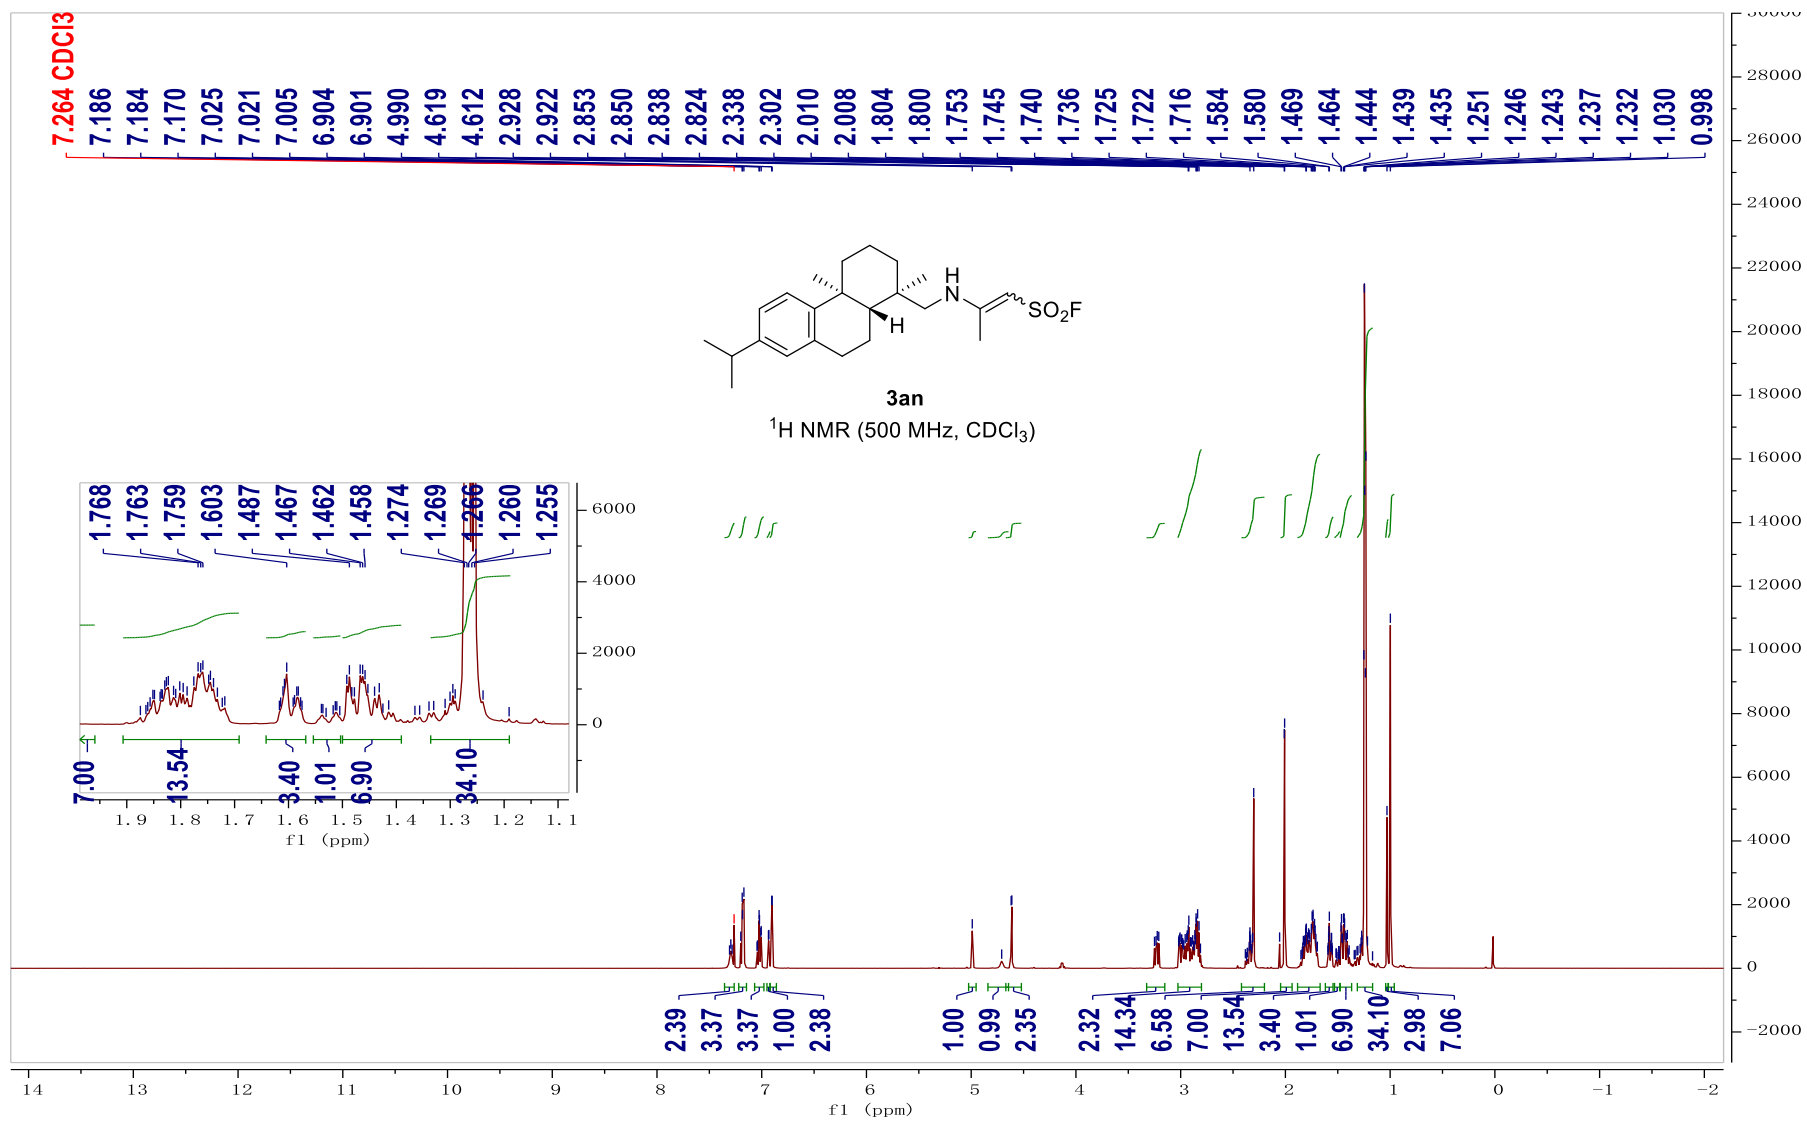

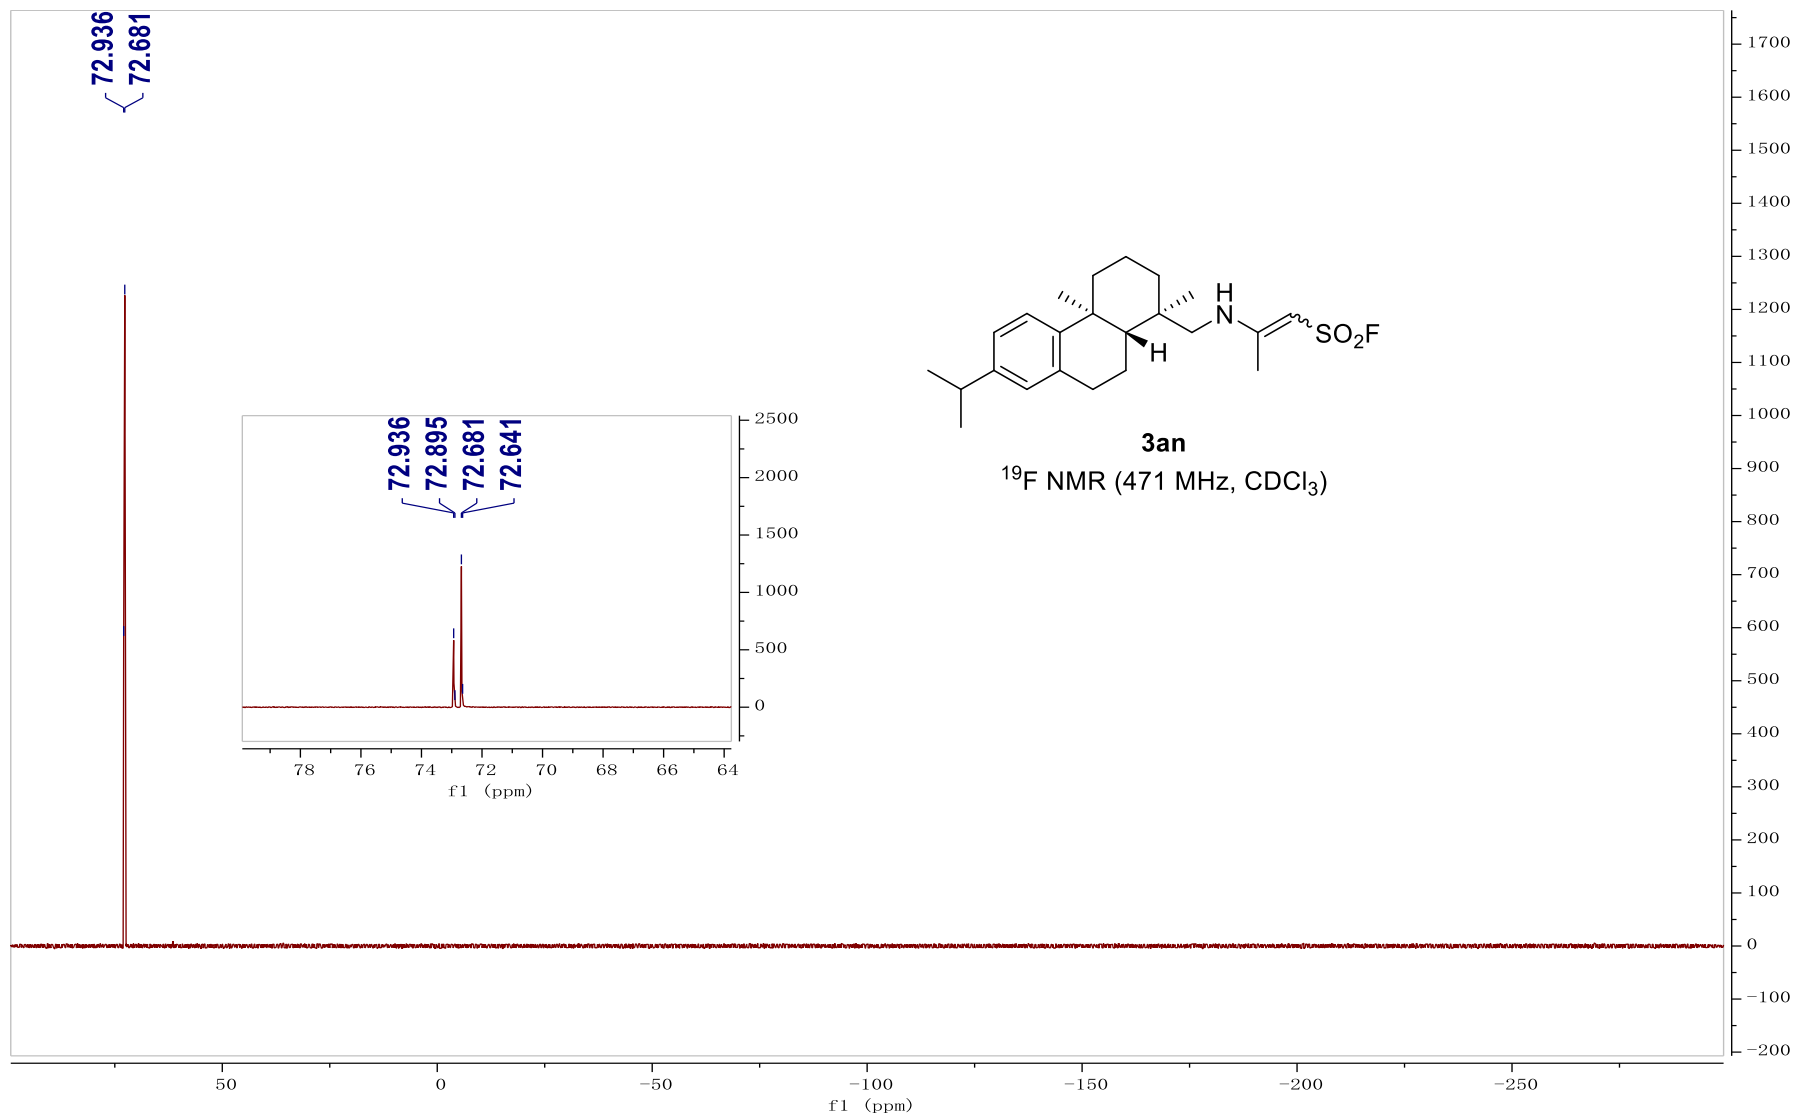

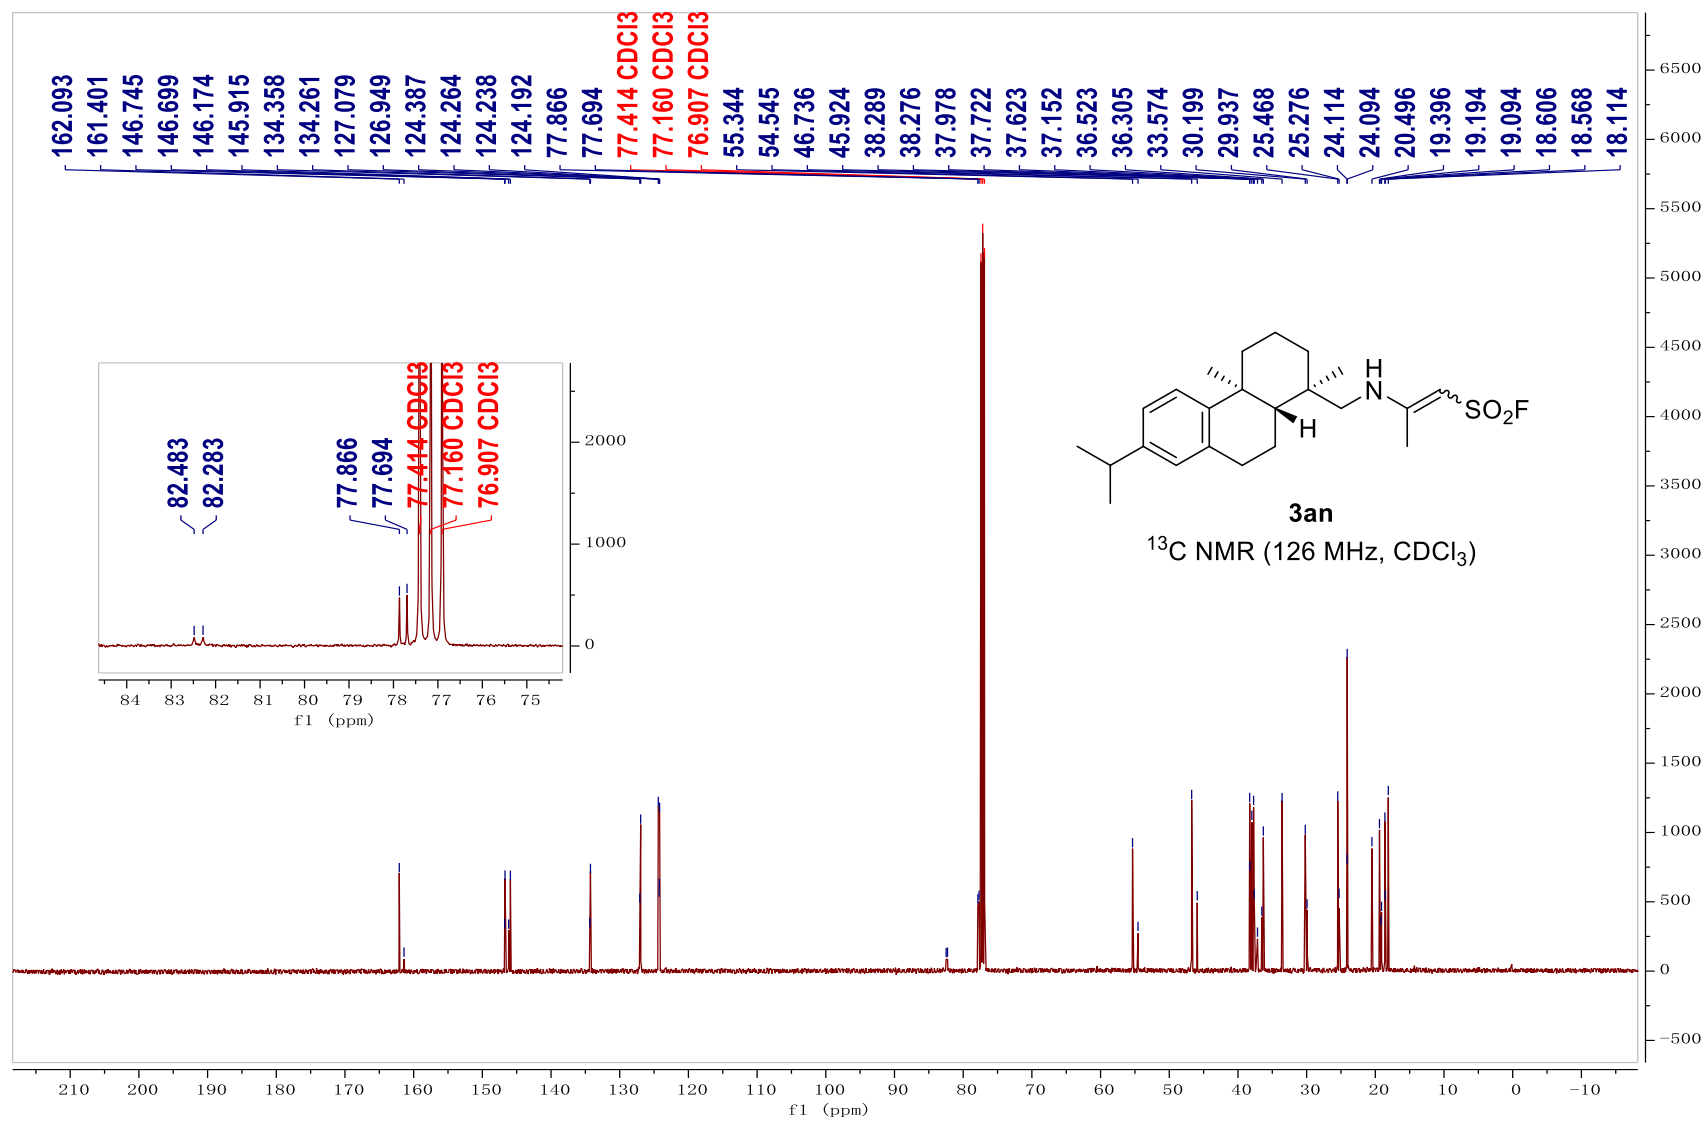

Supplement: d2qo01810a1.pdf [file d2qo01810a1.pdf]
